# Supplementary material for: Catalytic asymmetric construction of bridged bicyclo[m.3.1] rings using an intramolecular Diels–Alder reaction
Source: Royal Society of Chemistry journal article supplement (doi:10.1039/d4cc02850c), 2024-01-01
Supplement: d4cc02850c1.pdf [file d4cc02850c1.pdf]

# Supporting Information

## Catalytic Asymmetric Construction of Bridged Bicyclo[m.3.1] Rings by Intramolecular Diels-Alder Reaction

Kai Li<sup>b</sup>, Zhengxing Zhao<sup>b</sup>, Wenling Qin<sup>b</sup>, Yidong Liu,<sup>\* b</sup> and Hailong Yan<sup>\*ab</sup>

<sup>a</sup>Chongqing University FuLing Hospital, Chongqing University Chongqing 408000, P. R. China;

<sup>b</sup>Chongqing Key Laboratory of Natural Product Synthesis and Drug Research, School of Pharmaceutical Sciences, Chongqing University, Chongqing 401331, P. R. China.

\*Corresponding authors. E-mails: [\\*yidong@cqu.edu.cn](mailto:yidong@cqu.edu.cn), [\\*yhl198151@cqu.edu.cn](mailto:yhl198151@cqu.edu.cn)

### Table of Contents

|       |                                                                                      |     |
|-------|--------------------------------------------------------------------------------------|-----|
| I.    | General information.....                                                             | 2   |
| II.   | General procedure for the synthesis of the substrates .....                          | 2   |
| III.  | Optimization of the reaction conditions (Table S1).....                              | 6   |
| IV.   | General procedure for asymmetric reaction .....                                      | 7   |
| V.    | General procedure for initial experimental.....                                      | 7   |
| VI.   | <sup>1</sup> H, <sup>13</sup> C NMR and HRMS data of compounds ( <b>1a-1x</b> )..... | 7   |
| VII.  | <sup>1</sup> H, <sup>13</sup> C NMR and HRMS data of compounds ( <b>2a-4a</b> )..... | 20  |
| VIII. | Mechanistic studies .....                                                            | 50  |
| 1)    | Control experiments .....                                                            | 50  |
| 2)    | Density Functional Theory (DFT) Experiments.....                                     | 53  |
| IX.   | Gram-scale preparation and transformations.....                                      | 69  |
| X.    | Thermal stability experiments .....                                                  | 79  |
| XI.   | <sup>1</sup> H and <sup>13</sup> C NMR spectra .....                                 | 80  |
| XII.  | X-ray crystallographic information .....                                             | 142 |
|       | References .....                                                                     | 152 |

## I. General information

$^1\text{H}$  and  $^{13}\text{C}$  NMR spectra were recorded on Agilent 400MR DD2 (400 MHz) spectrometer and Agilent 600MR DD2 (600 MHz) spectrometer. Chemical shifts were reported in parts per million (ppm), and tetramethylsilane or the residual solvent peak was used as an internal reference:  $\text{CDCl}_3$  ( $^1\text{H}$  NMR tetramethylsilane  $\delta$  0.00,  $^{13}\text{C}$  NMR  $\delta$  77.00), data are reported as follows: chemical shift, multiplicity (s = singlet, d = doublet, t = triplet, q = quartet, m = multiplet, br = broad or as a combination of them), coupling constants (Hz) and integration. Enantiomeric excesses (ee) were determined by HPLC analysis on Hitachi Chromaster using DAICEL CHIRALCEL AD-H, 4.6mm $\Phi$  $\times$ 250mm, DAICEL CHIRALCEL AS-H, 4.6mm $\Phi$  $\times$ 250mm, DAICEL CHIRALCEL OD-H, 4.6mm $\Phi$  $\times$ 250mm, DAICEL CHIRALCEL IA-H, 4.6mm $\Phi$  $\times$ 250mm, DAICEL CHIRALCEL IB-H, 4.6mm $\Phi$  $\times$ 250mm. High resolution mass spectra (HRMS) were performed on Bruker Solarix 7.0 T and ThermoFisher Q Exactive Plus. X-ray crystallography analysis of single crystal was performed on an Agilent SuperNova-CCD X-Ray diffractometer. Optical rotations were measured on a Rudolph Autopol I polarimeter and are reported as follows:  $[\alpha]_{\text{D}}^{25}$  ( $c$  in g per 100 mL solvent). Unless otherwise stated, all reagents were purchased from commercial suppliers (Adamas, J&K, Sigma-Aldrich, TCI) and used without further purification.

## II. General procedure for the synthesis of the substrates

### Method A: (1a-1n, 1s-1v)

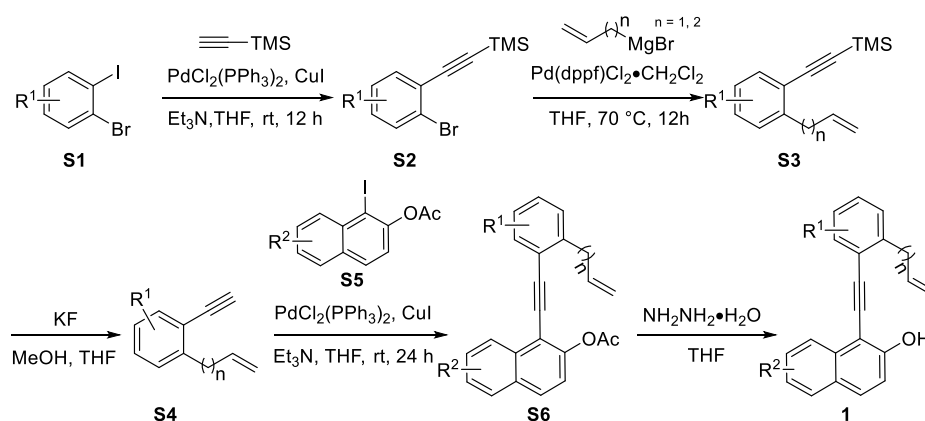

### General procedure for the synthesis of S2:

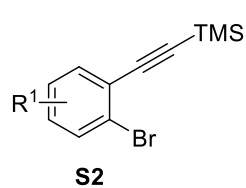

This step was carried out according to a literature method<sup>[1]</sup> with some modifications. To a solution of **S1** (8.0 mmol, 1.0 equiv.) in THF (20 mL) were added  $\text{PdCl}_2(\text{PPh}_3)_2$  (112 mg, 0.16 mmol, 0.02 equiv.),  $\text{CuI}$  (76 mg, 0.40 mmol, 0.05 equiv.), trimethylsilylacetylene (1.4 mL, 8.8 mmol, 1.1 equiv.) and  $\text{Et}_3\text{N}$  (20 mL) under a nitrogen atmosphere at room temperature. After being stirred for 12 h, the mixture was quenched by addition of saturated aqueous  $\text{NH}_4\text{Cl}$  and extracted with hexane. The extract was washed with water and brine, dried and concentrated to dryness. Purification by flash chromatography eluting with hexane to give **S2** (70-90% yield).

### General procedure for the synthesis of S3:

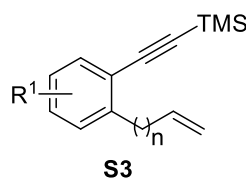

This step was carried out according to a literature method<sup>[2]</sup> with some modifications. **S2** (8 mmol, 1.0 equiv.) was dissolved in dry THF (20 mL) and placed in a pressure vessel. Alkenyl magnesium bromide (16 mL, 1.0 M in THF, 2.0 equiv) was added dropwise under a nitrogen atmosphere. After completion of the addition, Pd-catalyst (2 mol%) was added. The flask was sealed and heated at 70 °C for 12 h. The reaction was carefully quenched with water. The mixture is extracted

with EA and the combined organic layers were passed through MgSO<sub>4</sub> plug to remove residual water. After evaporation of solvents the crude product was purified by flash chromatography eluting with hexane to give **S3** (65-87% yield).

#### General procedure for the synthesis of **S4**:

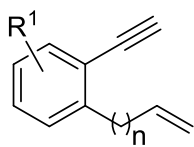

**S4**

This step was carried out according to a literature method<sup>[3]</sup> with some modifications. To a stirred solution of **S3** (6.0 mmol, 1.0 equiv) in MeOH (15 mL) and THF (15 mL) was added KF (1.04 g, 18.0 mmol, 3.0 equiv). The reaction mixture was stirred for 4 hours at room temperature. The reaction mixture was quenched by addition of saturated aqueous NH<sub>4</sub>Cl and extracted with EA. The organic phase was dried (Na<sub>2</sub>SO<sub>4</sub>) and concentrated. Purification by flash chromatography eluting with hexane to give **S4** (68-83% yield).

#### General procedure for the synthesis of **S6**:

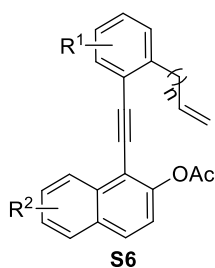

**S6**

This step was carried out according to a literature method<sup>[4]</sup> with some modifications. **S5** (2 mmol, 1.0 equiv), PdCl<sub>2</sub>(PPh<sub>3</sub>)<sub>2</sub> (28 mg, 0.04 mmol, 0.02 equiv) and CuI (19.1 mg, 0.1 mmol, 0.05 equiv) were weighed and added into an oven dried flask, evacuated and backfilled with nitrogen (3 times). Et<sub>3</sub>N (4 mL) and THF (4 mL) was injected into the flask. Then **S4** (310 mg, 2.2 mmol, 1.1 equiv) was added. The resulting mixture kept stirring for 24 h. Then the mixture was filtered through a pad of celite and washed with EA. Removal of solvent under reduced pressure, purified by column chromatography on silica gel (PE/EA = 20:1) to afford **S6** (60-78% yield).

#### General procedure for the synthesis of **1**:

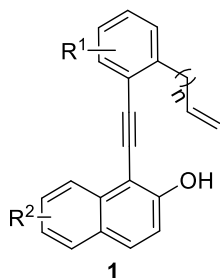

**1**

This step was carried out according to a literature method<sup>[3]</sup> with some modifications. To a stirred solution of **S6** (1.5 mmol, 1.0 equiv) in THF (10 mL) was added hydrazine monohydrate (0.73 mL, 7.5 mmol, 5.0 equiv, 50%) dropwise at rt. Then, the resulting solution was kept stirring until **S6** was consumed. Quenched with sat. aq. NH<sub>4</sub>Cl, extracted with EA, washed with brine, dried over Na<sub>2</sub>SO<sub>4</sub> and filtered, concentrated under reduced pressure and purified by column chromatography on silica gel (PE/EA = 20:1) to afford the desired product **1** (70-88% yield).

#### **Method B: (1a-3(1o), 1p-1r)**

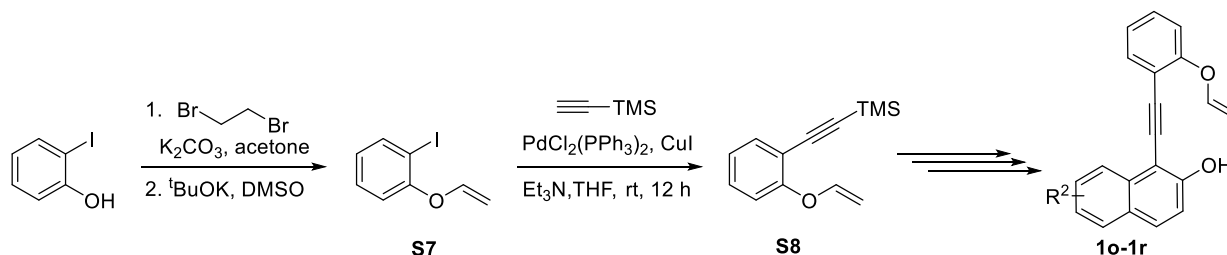

#### General procedure for the synthesis of **S7**:

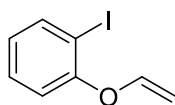

**S7**

This step was carried out according to a literature method<sup>[5]</sup> with some modifications. O-iodophenol (2.2 g, 10 mmol, 1.0 equiv.) was weighed and added into a round bottom flask. Acetone (50ml) was sequentially added. Slowly add 1, 2-dibromoethane (4.3 ml, 50 mmol, 5.0 equiv.). Finally, add potassium carbonate (2.76 g, 20 mmol, 2.0 equiv.), stir at room temperature for 14 hours, then the reaction was stirred at reflux for 6 hours. Quenched with sat. aq. NH<sub>4</sub>Cl, the organic phase is extracted with EA, concentrated and passed through the column to obtain the product. Dissolve the obtained product in dimethyl



### 1-bromo-2-(3-methoxyallyl)benzene(S11)

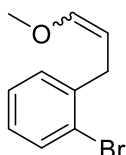

**S11**

This step was carried out according to a literature method<sup>[8]</sup> with some modifications. (Methoxymethyl)triphenylphosphonium chloride (5.70 g, 16.6 mmol, 1.1 equiv.) was weighed and added into a round bottom flask, evacuated and backfilled with nitrogen (3 times). THF (20 mL) was injected into the flask. Potassium tert-butoxide (2.02 g, 18.1 mmol, 1.2 equiv.) was added in portions at 0 °C. The color of the mixture turned from dark orange to red. After stirring for 40 min at 0 °C the reaction was allowed to warm up to room temperature. Then a solution of **S8** (3.0 g, 15.1 mmol, 1.0 equiv.) in THF (10 mL) was added dropwise and the mixture was stirred overnight. The reaction was quenched by addition of sat. aq. NH<sub>4</sub>Cl solution and the aqueous phase was extracted with EA. The combined organic layers were dried over MgSO<sub>4</sub> and the solvents were evaporated. Chromatographic purification (PE/EA = 10:1) of the crude material to give **S11** (2.50 g, 11 mmol, 73% yield) as a yellow oil.

### 1-((2-(3-methoxyallyl)phenyl)ethynyl)naphthalen-2-yl acetate (S12)

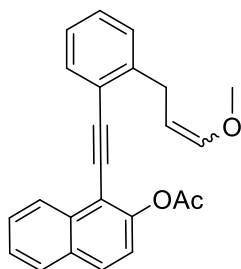

**S12**

This step was carried out according to a literature method<sup>[4]</sup> with some modifications. PdCl<sub>2</sub>(PPh<sub>3</sub>)<sub>2</sub> (140 mg, 0.2 mmol, 0.02 equiv) and CuI (95 mg, 0.5 mmol, 0.05 equiv) were weighed and added into an oven dried flask, evacuated and backfilled with nitrogen (3 times). Triethylamine (15 mL) was injected into the flask. **S11** (2.26 g, 10 mmol, 1.0 equiv) dissolved in THF (15 mL) was added. The mixture was stirred for 30 min at 70 °C. After that, the alkyne (2.31 g, 11 mmol, 1.1 equiv) dissolved in THF (10 mL) was added slowly. The resulting mixture kept stirring for 2 h at 70 °C. Then the mixture was filtered through a pad of celite and washed with EA. Removal of solvent under reduced pressure, purified by flash chromatography on silica gel (PE/EA = 15:1) to afford **S12** (2.56 g, 7.2 mmol, 72% yield) as a yellow oil.

### (Z)-1-((2-(3-methoxyallyl)phenyl)ethynyl)naphthalen-2-ol (1a-1(Z))

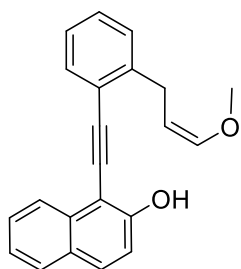

**1a-1(Z)**

This step was carried out according to a literature method<sup>[3]</sup> with some modifications. To a stirred solution of **S12** (2.56 g, 7.2 mmol, 1.0 equiv) in THF (20 mL) was added hydrazine monohydrate (3.5 mL, 36 mmol, 5.0 equiv, 50%) dropwise at rt. Then, the resulting solution was kept stirring until **S12** was consumed. Quenched with sat. aq. NH<sub>4</sub>Cl, extracted with EA, washed with brine, dried over Na<sub>2</sub>SO<sub>4</sub> and filtered, concentrated under reduced pressure and purified by column chromatography on silica gel (PE/EA = 30:1 to 15:1) to afford the desired product **1a-Z** (815 mg, 2.59 mmol, 36% yield) as an orange oil.

### III. Optimization of the reaction conditions (Table S1<sup>a</sup>)

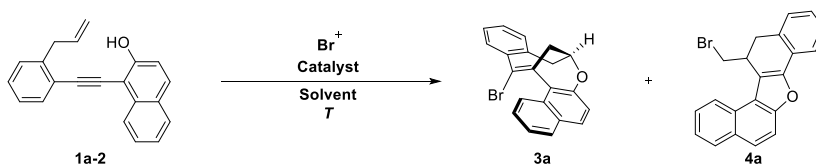

| Entry           | Catalyst  | Solvent           | T (°C) | Br <sup>+</sup> | Yield <sup>b</sup> of <b>3a</b> (%) | ee <sup>c</sup> (%) of <b>3a</b> | ee <sup>d</sup> (%) of <b>4a</b> | <b>3a/4a</b> <sup>e</sup> |
|-----------------|-----------|-------------------|--------|-----------------|-------------------------------------|----------------------------------|----------------------------------|---------------------------|
| 1               | <b>C1</b> | DCM               | -40    | NBS             | 30                                  | 92                               | 90                               | 57/43                     |
| 2               | <b>C2</b> | DCM               | -40    | NBS             | 28                                  | -73                              | -65                              | 60/40                     |
| 3               | <b>C3</b> | DCM               | -40    | NBS             | 30                                  | -10                              | -7                               | 58/42                     |
| 4               | <b>C4</b> | DCM               | -40    | NBS             | 29                                  | 72                               | 58                               | 60/40                     |
| 5               | <b>C5</b> | DCM               | -40    | NBS             | 33                                  | 85                               | 2                                | 58/42                     |
| 6               | <b>C6</b> | DCM               | -40    | NBS             | 34                                  | 92                               | 93                               | 64/36                     |
| 7               | <b>C7</b> | DCM               | -40    | NBS             | 30                                  | 89                               | 80                               | 62/38                     |
| 8               | <b>C6</b> | toluene           | -40    | NBS             | 31                                  | 95                               | 90                               | 62/38                     |
| 9               | <b>C6</b> | acetone           | -40    | NBS             | 40                                  | 52                               | 45                               | 80/20                     |
| 10              | <b>C6</b> | THF               | -40    | NBS             | 45                                  | 41                               | 25                               | 80/20                     |
| 11              | <b>C6</b> | CHCl <sub>3</sub> | -40    | NBS             | 35                                  | 60                               | 88                               | 67/33                     |
| 12              | <b>C6</b> | EA                | -40    | NBS             | 55                                  | 90                               | 69                               | 87/13                     |
| 13              | <b>C6</b> | EA                | -60    | NBS             | 60                                  | 93                               | 91                               | 88/12                     |
| 14              | <b>C6</b> | EA                | -78    | NBS             | 62                                  | 95                               | 93                               | 90/10                     |
| 15              | <b>C6</b> | EA                | -78    | NBP             | 63                                  | 85                               | 83                               | 88/12                     |
| 16              | <b>C6</b> | EA                | -78    | DBDMH           | 57                                  | 65                               | 75                               | 88/12                     |
| 17 <sup>f</sup> | <b>C6</b> | EA                | -78    | NBS             | 60                                  | 93                               | 96                               | 90/10                     |
| 18 <sup>g</sup> | <b>C6</b> | EA                | -78    | NBS             | 65                                  | 97                               | 92                               | 91/9                      |
| 19 <sup>h</sup> | <b>C6</b> | EA                | -78    | NBS             | 65                                  | 92                               | 91                               | 91/9                      |

<sup>a</sup>Reaction conditions: **1a-2** (0.025 mmol, 1.0 equiv), catalyst (0.0025 mmol, 10 mol%) in solvent (1 mL) at corresponding temperature for 30 min, then brominating reagents (1.05 equiv) at corresponding temperature, 0.5-6 h. <sup>b</sup>Isolated yield of **3a**. <sup>c</sup>Enantiomeric excess (ee) of **3a** determined by HPLC. <sup>d</sup>Enantiomeric excess (ee) of **4a** determined by HPLC. <sup>e</sup>The ratio of (**3a**:**4a**) were determined by the <sup>1</sup>H NMR analysis. <sup>f</sup>Reaction in EA (0.5 mL). <sup>g</sup>Reaction in EA (2 mL). <sup>h</sup>Reaction in EA (3.0 mL).

#### IV. General procedure for asymmetric reaction

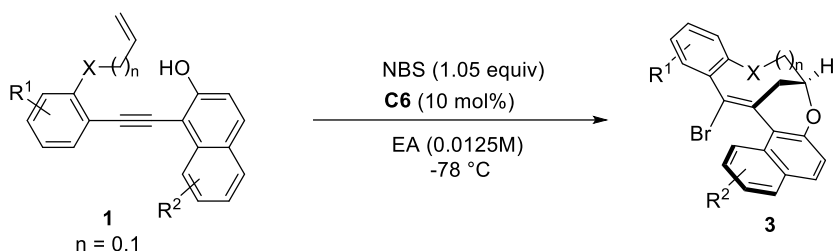

##### Condition[A]:

A solution of **1** (1.0 equiv) and **catalyst-6** (10 mol%) in EA (0.0125M) was stirred at  $-78\text{ }^{\circ}\text{C}$  for 30 min, then NBS (1.05 equiv) was added. After stirring at  $-78\text{ }^{\circ}\text{C}$  for 6-24 h, the reaction mixture was concentrated under reduced pressure. The resulting residue was purified by silica gel flash column chromatography using PE/EA eluent (60:1 to 50:1) to afford the annulation product **3**.

#### V. General procedure for initial experimental

##### Condition[B]:

A solution of **1** (1.0 equiv.) and **catalyst-6** (10 mol%) in DCM (0.025M) was stirred at  $-40\text{ }^{\circ}\text{C}$  for 30 min, then NBS (1.05 equiv) was added. After stirring at  $-40\text{ }^{\circ}\text{C}$  for 6 h, the reaction mixture was concentrated under reduced pressure. The resulting residue was purified by silica gel flash column chromatography using PE/EA eluent (60:1 to 50:1) to afford the annulation product **2, 3, 4**.

#### VI. $^1\text{H}$ , $^{13}\text{C}$ NMR and HRMS data of compounds (1a-1x)

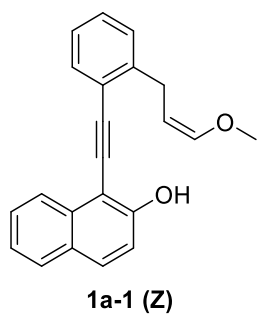

##### (Z)-1-((2-(3-methoxyallyl)phenyl)ethynyl)naphthalen-2-ol (**1a-1 (Z)**)

Compound **1a-1 (Z)** is an unknown compound. The compound was synthesized in 36% yield (815 mg, 2.59 mmol) following the general procedure (**Method D**) and was purified by silica gel column chromatography using PE:EA (30:1 to 15:1) as eluent.

Yellow oil. ( $R_f = 0.5$ , PE/EA = 5:1)

$^1\text{H NMR}$  (400 MHz,  $\text{CDCl}_3$ )  $\delta$  8.24 (d,  $J = 8.3$  Hz, 1H), 7.77 (t,  $J = 8.4$  Hz, 2H), 7.65 (d,  $J = 7.5$  Hz, 1H), 7.56 (t,  $J = 7.4$  Hz, 1H), 7.40 – 7.30 (m, 3H), 7.27 – 7.21 (m, 2H), 6.58 (s, 1H), 6.02 (d,  $J = 6.1$  Hz, 1H), 4.61 (q,  $J = 7.0$  Hz, 1H), 3.73 (d,  $J = 6.6$  Hz, 2H), 3.61 (s, 3H).

$^{13}\text{C NMR}$  (100 MHz,  $\text{CDCl}_3$ )  $\delta$  155.97, 146.80, 142.96, 133.63, 132.39, 130.51, 128.92, 128.88, 128.43, 128.22, 127.31, 126.05, 124.94, 123.97, 122.19, 116.65, 104.65, 103.22, 99.85, 85.52, 59.80, 29.60.

**HRMS (ESI)**  $m/z$  Calcd for  $\text{C}_{22}\text{H}_{17}\text{O}_2$  [M - H] $^-$ : 313.1234, Found: 313.1219.

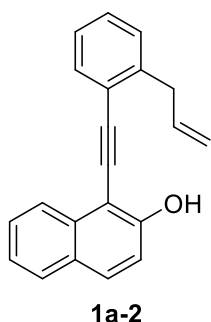

### 1-((2-allylphenyl)ethynyl)naphthalen-2-ol (1a-2)

Compound **1a-2** is an unknown compound. The compound was synthesized in 85% yield (363 mg, 1.28 mmol) following the general procedure (**Method A**) and was purified by silica gel column chromatography using PE:EA (30:1 to 15:1) as eluent.

White solid. ( $R_f = 0.5$ , PE/EA = 5:1)

**$^1\text{H NMR}$**  (400 MHz,  $\text{CDCl}_3$ )  $\delta$  8.18 (d,  $J = 8.3$  Hz, 1H), 7.68 (d,  $J = 8.2$  Hz, 1H), 7.65 (d,  $J = 9.0$  Hz, 1H), 7.57 (d,  $J = 7.5$  Hz, 1H), 7.49 (t,  $J = 7.5$  Hz, 1H), 7.30 (t,  $J = 7.4$  Hz, 1H), 7.24 (d,  $J = 7.2$  Hz, 1H), 7.22 – 7.14 (m, 3H), 6.31 (s, 1H), 6.07 (ddt,  $J = 16.4, 10.1, 6.0$  Hz, 1H), 5.20 – 5.10 (m, 1H), 5.10 – 4.98 (m, 1H), 3.64 (m, 2H).

**$^{13}\text{C NMR}$**  (100 MHz,  $\text{CDCl}_3$ )  $\delta$  155.99, 141.06, 136.26, 133.40, 132.24, 130.58, 129.25, 128.92, 128.32, 128.19, 127.28, 126.30, 124.75, 123.92, 122.33, 116.36, 116.31, 102.89, 99.66, 85.38, 38.72.

**HRMS (ESI)**  $m/z$  Calcd for  $\text{C}_{21}\text{H}_{15}\text{O}^+[\text{M} - \text{H}]$ : 283.1128, Found: 283.1115.

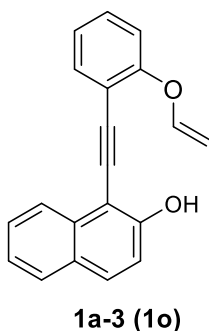

### 1-((2-(allyloxy)phenyl)ethynyl)naphthalen-2-ol (1a-3 (1o))

Compound **1a-3 (1o)** is an unknown compound. The compound was synthesized in 88% yield (378 mg, 1.32 mmol) following the general procedure (**Method B**) and was purified by silica gel column chromatography using PE:EA (30:1 to 15:1) as eluent.

White solid. ( $R_f = 0.5$ , PE/EA = 5:1)

**$^1\text{H NMR}$**  (600 MHz,  $\text{CDCl}_3$ )  $\delta$  8.22 (d,  $J = 8.3$  Hz, 1H), 7.77 (t,  $J = 7.7$  Hz, 2H), 7.62 (d,  $J = 7.6$  Hz, 1H), 7.55 (t,  $J = 7.7$  Hz, 1H), 7.39 – 7.33 (m, 2H), 7.24 (d,  $J = 8.7$  Hz, 1H), 7.14 (t,  $J = 7.6$  Hz, 1H), 7.08 (d,  $J = 8.3$  Hz, 1H), 6.84 (s, 1H), 6.76 (dd,  $J = 13.7, 6.0$  Hz, 1H), 4.97 (dd,  $J = 13.7, 2.0$  Hz, 1H), 4.61 (dd,  $J = 6.0, 2.0$  Hz, 1H).

**$^{13}\text{C NMR}$**  (150 MHz,  $\text{CDCl}_3$ )  $\delta$  156.80, 156.58, 147.65, 133.05, 132.03, 130.71, 129.82, 128.33, 128.22, 127.31, 124.98, 123.98, 123.38, 116.46, 116.04, 113.93, 102.96, 96.95, 96.40, 87.81.

**HRMS (ESI)**  $m/z$  Calcd for  $\text{C}_{20}\text{H}_{13}\text{O}_2^+[\text{M} - \text{H}]$ : 285.0921, Found: 285.0909.



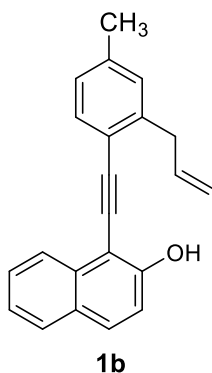

### 1-((2-allyl-4-methylphenyl)ethynyl)naphthalen-2-ol (**1b**)

Compound **1b** is an unknown compound. The compound was synthesized in 78% yield (349 mg, 1.17 mmol) following the general procedure (**Method A**) and was purified by silica gel column chromatography using PE:EA (30:1 to 15:1) as eluent.

Yellow solid. ( $R_f = 0.5$ , PE/EA= 5:1)

**$^1\text{H NMR}$**  (400 MHz,  $\text{CDCl}_3$ )  $\delta$  8.19 (d,  $J = 8.4$  Hz, 1H), 7.77 (t,  $J = 8.7$  Hz, 2H), 7.58 – 7.51 (m, 2H), 7.42 – 7.34 (m, 1H), 7.22 (d,  $J = 8.9$  Hz, 1H), 7.12 – 7.07 (m, 2H), 6.26 (s, 1H), 6.12 (ddt,  $J = 16.5, 9.8, 6.0$  Hz, 1H), 5.17 (dd,  $J = 10.1, 1.9$  Hz, 1H), 5.08 (dd,  $J = 17.1, 2.0$  Hz, 1H), 3.67 (d,  $J = 5.8$  Hz, 2H), 2.39 (s, 3H).

**$^{13}\text{C NMR}$**  (100 MHz,  $\text{CDCl}_3$ )  $\delta$  155.95, 141.13, 139.37, 136.47, 133.47, 132.28, 130.48, 130.19, 128.43, 128.26, 127.33, 127.26, 124.91, 124.00, 119.40, 116.36, 103.15, 99.99, 84.59, 38.83, 21.54.

**HRMS (ESI)**  $m/z$  Calcd for  $\text{C}_{22}\text{H}_{17}\text{O}$  [ $\text{M} - \text{H}$ ] $^-$ : 297.1285, Found: 297.1276.

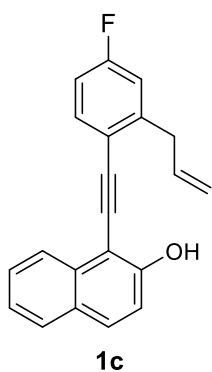

### 1-((2-allyl-4-fluorophenyl)ethynyl)naphthalen-2-ol (**1c**)

Compound **1c** is an unknown compound. The compound was synthesized in 79% yield (358 mg, 1.19 mmol) following the general procedure (**Method A**) and was purified by silica gel column chromatography using PE:EA (30:1 to 15:1) as eluent.

White solid. ( $R_f = 0.5$ , PE/EA= 5:1)

**$^1\text{H NMR}$**  (400 MHz,  $\text{CDCl}_3$ )  $\delta$  8.16 (d,  $J = 8.4$  Hz, 1H), 7.78 (t,  $J = 7.1$  Hz, 2H), 7.68 – 7.47 (m, 2H), 7.38 (t,  $J = 7.6$  Hz, 1H), 7.26 – 7.19 (m, 1H), 7.12 – 6.86 (m, 2H), 6.20 (s, 1H), 6.08 (ddt,  $J = 16.6, 11.3, 6.2$  Hz, 1H), 5.21 (d,  $J = 10.2$  Hz, 1H), 5.10 (d,  $J = 17.1$  Hz, 1H), 3.69 (d,  $J = 6.0$  Hz, 2H).

$^{13}\text{C}$  NMR (100 MHz,  $\text{CDCl}_3$ )  $\delta$  162.83 (d,  $J = 250.7$  Hz), 156.07, 144.14 (d,  $J = 7.7$  Hz), 135.43, 134.12 (d,  $J = 8.4$  Hz), 133.45, 130.78, 128.43, 128.32, 127.43, 124.78, 124.09, 118.51 (d,  $J = 3.0$  Hz), 117.13, 116.45 (d,  $J = 22.2$  Hz), 116.41, 113.76 (d,  $J = 21.9$  Hz), 102.76, 98.64, 85.07, 38.76.

**HRMS (ESI)**  $m/z$  Calcd for  $\text{C}_{21}\text{H}_{14}\text{FO}^-[\text{M} - \text{H}]^-$ : 301.1034, Found: 301.1027.

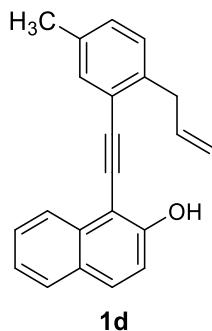

### 1-((2-allyl-5-methylphenyl)ethynyl)naphthalen-2-ol (**1d**)

Compound **1d** is an unknown compound. The compound was synthesized in 82% yield (367 mg, 1.23 mmol) following the general procedure (**Method A**) and was purified by silica gel column chromatography using PE:EA (30:1 to 15:1) as eluent.

White solid. ( $R_f = 0.5$ , PE/EA= 5:1)

$^1\text{H}$  NMR (400 MHz,  $\text{CDCl}_3$ )  $\delta$  8.19 (d,  $J = 8.4$  Hz, 1H), 7.76 (t,  $J = 8.5$  Hz, 2H), 7.54 (t,  $J = 7.6$  Hz, 1H), 7.46 (s, 1H), 7.37 (t,  $J = 7.4$  Hz, 1H), 7.24 – 7.12 (m, 3H), 6.18 – 6.01 (m, 1H), 5.22 – 5.11 (m, 1H), 5.11 – 4.99 (m, 1H), 3.66 (d,  $J = 5.8$  Hz, 2H), 2.36 (s, 3H).

$^{13}\text{C}$  NMR (100 MHz,  $\text{CDCl}_3$ )  $\delta$  156.00, 138.10, 136.57, 135.94, 133.42, 132.71, 130.52, 129.91, 129.24, 128.35, 128.21, 127.28, 124.82, 123.94, 122.14, 116.32, 116.17, 102.99, 99.96, 84.93, 38.36, 20.75.

**HRMS (ESI)**  $m/z$  Calcd for  $\text{C}_{22}\text{H}_{17}\text{O}[\text{M} - \text{H}]^-$ : 297.1285, Found: 297.1274.

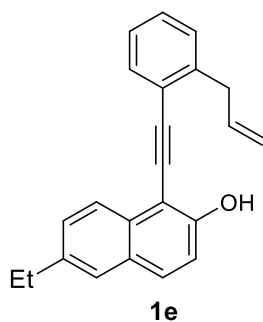

### 1-((2-allylphenyl)ethynyl)-6-ethylnaphthalen-2-ol (**1e**)

Compound **1e** is an unknown compound. The compound was synthesized in 80% yield (375 mg, 1.2 mmol) following the general procedure (**Method A**) and was purified by silica gel column chromatography using PE:EA (30:1 to 15:1) as eluent.

Pale yellow solid. ( $R_f = 0.5$ , PE/EA= 5:1)

$^1\text{H}$  NMR (400 MHz,  $\text{CDCl}_3$ )  $\delta$  8.11 (d,  $J = 8.5$  Hz, 1H), 7.69 (d,  $J = 8.9$  Hz, 1H), 7.63 (d,  $J = 7.2$  Hz, 1H), 7.55 (s, 1H), 7.41 (d,  $J = 8.5$  Hz, 1H), 7.36 – 7.30 (m, 1H), 7.30 – 7.23 (m, 2H), 7.18 (d,  $J = 8.9$  Hz, 1H), 6.18 (s, 1H), 6.16 – 6.04 (m,

1H), 5.17 (d,  $J = 10.2$  Hz, 1H), 5.07 (d,  $J = 17.1$  Hz, 1H), 3.70 (d,  $J = 5.9$  Hz, 2H), 2.78 (q,  $J = 7.6$  Hz, 2H), 1.31 (t,  $J = 7.6$  Hz, 3H).

$^{13}\text{C}$  NMR (100 MHz,  $\text{CDCl}_3$ )  $\delta$  155.52, 141.23, 139.91, 136.33, 132.34, 131.81, 130.22, 129.37, 129.01, 128.63, 128.54, 126.41, 126.07, 124.82, 122.51, 116.44, 116.27, 102.76, 99.50, 85.57, 38.85, 28.69, 15.57.

**HRMS (ESI)**  $m/z$  Calcd for  $\text{C}_{23}\text{H}_{19}\text{O}[\text{M} - \text{H}]^-$ : 311.1441, Found: 311.1432.

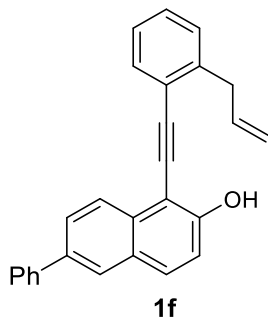

### 1-((2-allylphenyl)ethynyl)-6-phenylnaphthalen-2-ol (**1f**)

Compound **1f** is an unknown compound. The compound was synthesized in 88% yield (476 mg, 1.32mmol) following the general procedure (**Method A**) and was purified by silica gel column chromatography using PE:EA (30:1 to 15:1) as eluent.

White solid. ( $R_f = 0.5$ , PE/EA = 5:1)

$^1\text{H}$  NMR (600 MHz,  $\text{CDCl}_3$ )  $\delta$  8.24 (d,  $J = 8.1$  Hz, 1H), 7.98 (s, 1H), 7.81 (d,  $J = 8.5$  Hz, 2H), 7.70 (d,  $J = 7.6$  Hz, 2H), 7.66 (d,  $J = 6.7$  Hz, 1H), 7.51 – 7.43 (m, 2H), 7.41 – 7.33 (m, 2H), 7.33 – 7.26 (m, 2H), 7.24 (d,  $J = 8.7$  Hz, 1H), 6.20 – 6.07 (m, 1H), 5.18 (d,  $J = 10.3$  Hz, 1H), 5.09 (d,  $J = 17.1$  Hz, 1H), 3.73 (d,  $J = 9.1$  Hz, 2H).

$^{13}\text{C}$  NMR (150 MHz,  $\text{CDCl}_3$ )  $\delta$  156.17, 141.33, 140.82, 136.88, 136.35, 132.70, 132.42, 130.94, 129.43, 129.14, 128.85, 128.72, 127.24, 127.22, 127.01, 126.46, 126.19, 125.45, 122.44, 116.86, 116.49, 102.93, 99.78, 85.34, 38.89.

**HRMS (ESI)**  $m/z$  Calcd for  $\text{C}_{27}\text{H}_{19}\text{O}[\text{M} - \text{H}]^-$ : 359.1441, Found: 359.1434.

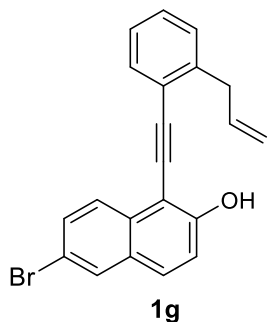

### 1-((2-allylphenyl)ethynyl)-6-bromonaphthalen-2-ol (**1g**)

Compound **1g** is an unknown compound. The compound was synthesized in 81% yield (441 mg, 1.22 mmol) following the general procedure (**Method A**) and was purified by silica gel column chromatography using PE:EA (30:1 to 15:1) as eluent.

White solid. ( $R_f = 0.5$ , PE/EA = 5:1)

$^1\text{H}$  NMR (400 MHz,  $\text{CDCl}_3$ )  $\delta$  8.04 (d,  $J = 8.8$  Hz, 1H), 7.92 (s, 1H), 7.71 – 7.55 (m, 3H), 7.40 – 7.33 (m, 1H), 7.33 – 7.26 (m, 2H), 7.25 – 7.20 (m, 1H), 6.28 (s, 1H), 6.11 (ddt,  $J = 16.4, 10.1, 5.9$  Hz, 1H), 5.23 – 5.12 (m, 1H), 5.12 – 5.00 (m, 1H), 3.69 (d,  $J = 5.8$  Hz, 2H).

$^{13}\text{C}$  NMR (100 MHz,  $\text{CDCl}_3$ )  $\delta$  156.24, 141.28, 136.28, 132.41, 132.02, 130.54, 130.18, 129.58, 129.49, 129.30, 126.69, 126.49, 122.16, 117.73, 117.54, 116.52, 103.25, 100.09, 84.69, 38.83.

**HRMS (ESI)  $m/z$**  Calcd for  $C_{21}H_{14}BrO^-[M - H]^+$ : 361.0234, Found: 361.0225.

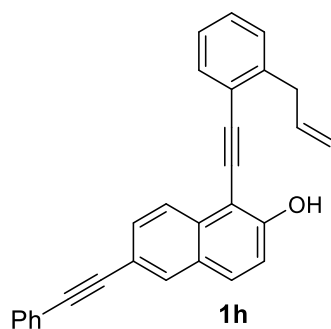

### 1-((2-allylphenyl)ethynyl)-6-(phenylethynyl)naphthalen-2-ol (**1h**)

Compound **1h** is an unknown compound. The compound was synthesized in 83% yield (479 mg, 1.25 mmol) following the general procedure (**Method A**) and was purified by silica gel column chromatography using PE:EA (30:1 to 15:1) as eluent.

Pale yellow solid. ( $R_f$  = 0.4, PE/EA = 5:1)

**$^1H$  NMR** (400 MHz,  $CDCl_3$ )  $\delta$  8.13 (d,  $J$  = 8.6 Hz, 1H), 7.98 (s, 1H), 7.72 (d,  $J$  = 8.9 Hz, 1H), 7.68 – 7.61 (m, 2H), 7.61 – 7.53 (m, 2H), 7.41 – 7.31 (m, 4H), 7.29 (d,  $J$  = 7.7 Hz, 2H), 7.21 (s, 1H), 6.30 (s, 1H), 6.12 (ddt,  $J$  = 16.2, 10.1, 6.0 Hz, 1H), 5.22 – 5.13 (m, 1H), 5.12 – 5.01 (m, 1H), 3.70 (d,  $J$  = 5.7 Hz, 2H).

**$^{13}C$  NMR** (100 MHz,  $CDCl_3$ )  $\delta$  156.66, 141.27, 136.30, 132.97, 132.42, 131.73, 131.58, 130.49, 129.98, 129.45, 129.22, 128.34, 128.22, 128.05, 126.47, 125.01, 123.26, 122.26, 118.76, 117.11, 116.50, 103.24, 99.98, 89.59, 89.47, 84.91, 38.84.

**HRMS (ESI)  $m/z$**  Calcd for  $C_{29}H_{19}O^-[M - H]^+$ : 383.1441, Found: 3831.1436.

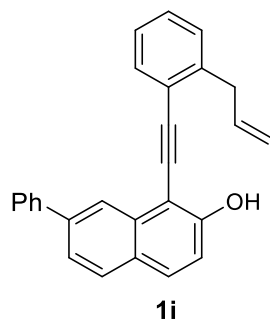

### 1-((2-allylphenyl)ethynyl)-7-phenylnaphthalen-2-ol (**1i**)

Compound **1i** is an unknown compound. The compound was synthesized in 80% yield (433 mg, 1.20 mmol) following the general procedure (**Method A**) and was purified by silica gel column chromatography using PE:EA (30:1 to 15:1) as eluent.

White solid. ( $R_f$  = 0.4, PE/EA = 5:1)

**$^1H$  NMR** (400 MHz,  $CDCl_3$ )  $\delta$  8.39 (s, 1H), 7.88 – 7.69 (m, 4H), 7.63 (d,  $J$  = 8.2 Hz, 2H), 7.47 (t,  $J$  = 7.6 Hz, 2H), 7.41 – 7.23 (m, 4H), 7.20 (d,  $J$  = 8.0 Hz, 1H), 6.28 (s, 1H), 6.20 – 6.02 (m, 1H), 5.23 – 4.95 (m, 2H), 3.73 (d,  $J$  = 6.0 Hz, 2H).

**$^{13}C$  NMR** (100 MHz,  $CDCl_3$ )  $\delta$  156.44, 141.35, 141.03, 140.12, 136.27, 133.79, 132.32, 130.38, 129.32, 129.08, 128.84, 128.81, 127.63, 127.49, 126.43, 123.74, 122.91, 122.43, 116.54, 116.39, 103.25, 100.11, 85.40, 38.88.

**HRMS (ESI)  $m/z$**  Calcd for  $C_{27}H_{19}O^-[M - H]^+$ : 359.1441, Found: 359.1437.

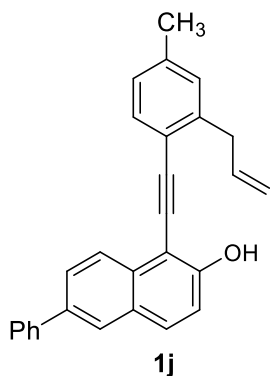

### 1-((2-allyl-4-methylphenyl)ethynyl)-6-phenylnaphthalen-2-ol (1j)

Compound **1j** is an unknown compound. The compound was synthesized in 82% yield (461 mg, 1.23 mmol) following the general procedure (**Method A**) and was purified by silica gel column chromatography using PE:EA (30:1 to 15:1) as eluent.

White solid. ( $R_f$  = 0.5, PE/EA = 5:1)

**$^1\text{H NMR}$**  (400 MHz,  $\text{CDCl}_3$ )  $\delta$  8.25 (d,  $J$  = 8.6 Hz, 1H), 7.98 (s, 1H), 7.81 (d,  $J$  = 8.8 Hz, 2H), 7.71 (d,  $J$  = 7.8 Hz, 2H), 7.55 (d,  $J$  = 7.6 Hz, 1H), 7.48 (t,  $J$  = 7.6 Hz, 2H), 7.37 (t,  $J$  = 7.3 Hz, 1H), 7.26 – 7.22 (m, 1H), 7.11 (d,  $J$  = 9.9 Hz, 2H), 6.29 (s, 1H), 6.13 (ddt,  $J$  = 16.5, 10.7, 6.0 Hz, 1H), 5.23 – 5.14 (m, 1H), 5.13 – 5.03 (m, 1H), 3.69 (d,  $J$  = 5.8 Hz, 2H), 2.39 (s, 3H).

**$^{13}\text{C NMR}$**  (100 MHz,  $\text{CDCl}_3$ )  $\delta$  156.01, 141.16, 140.83, 139.42, 136.79, 136.49, 132.67, 132.30, 130.73, 130.20, 128.84, 128.69, 127.27, 127.21, 126.94, 126.16, 125.49, 119.37, 116.81, 116.38, 100.01, 84.57, 38.86, 21.55.

**HRMS (ESI)**  $m/z$  Calcd for  $\text{C}_{28}\text{H}_{21}\text{O}^+[\text{M} - \text{H}]^+$ : 373.1598, Found: 373.1589.

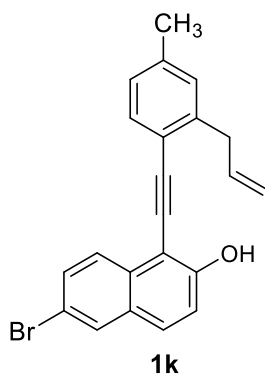

### 1-((2-allyl-4-methylphenyl)ethynyl)-6-bromonaphthalen-2-ol (1k)

Compound **1k** is an unknown compound. The compound was synthesized in 75% yield (424 mg, 1.13 mmol) following the general procedure (**Method A**) and was purified by silica gel column chromatography using PE:EA (30:1 to 15:1) as eluent.

White solid. ( $R_f$  = 0.5, PE/EA = 5:1)

**$^1\text{H NMR}$**  (400 MHz,  $\text{CDCl}_3$ )  $\delta$  8.03 (d,  $J$  = 8.7 Hz, 1H), 7.90 (s, 1H), 7.63 (d,  $J$  = 8.8 Hz, 1H), 7.58 (d,  $J$  = 8.7 Hz, 1H), 7.52 (d,  $J$  = 7.5 Hz, 1H), 7.21 (d,  $J$  = 8.7 Hz, 1H), 7.14 – 7.02 (m, 2H), 6.27 (s, 1H), 6.18 – 6.01 (m, 1H), 5.17 (d,  $J$  = 10.0 Hz, 1H), 5.06 (d,  $J$  = 17.1 Hz, 1H), 3.64 (d,  $J$  = 4.5 Hz, 2H), 2.38 (s, 3H).

$^{13}\text{C}$  NMR (100 MHz,  $\text{CDCl}_3$ )  $\delta$  156.09, 141.13, 139.59, 136.41, 132.29, 132.00, 130.45, 130.24, 130.14, 129.50, 129.35, 127.29, 126.72, 119.11, 117.68, 117.48, 116.40, 103.46, 100.36, 83.98, 38.80, 21.55.

HRMS (ESI)  $m/z$  Calcd for  $\text{C}_{22}\text{H}_{16}\text{BrO}[\text{M} - \text{H}]^-$ : 375.0390, Found: 375.0382.

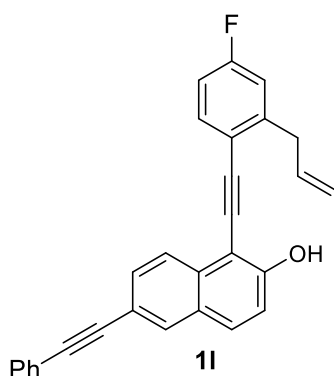

### 1-((2-allyl-4-fluorophenyl)ethynyl)-6-(phenylethynyl)naphthalen-2-ol (**1l**)

Compound **1l** is an unknown compound. The compound was synthesized in 77% yield (465 mg, 1.16 mmol) following the general procedure (**Method A**) and was purified by silica gel column chromatography using PE:EA (30:1 to 15:1) as eluent.

Pale yellow solid. ( $R_f$  = 0.5, PE/EA = 5:1)

$^1\text{H}$  NMR (400 MHz,  $\text{CDCl}_3$ )  $\delta$  8.11 (d,  $J$  = 8.6 Hz, 1H), 8.00 (s, 1H), 7.75 (d,  $J$  = 8.9 Hz, 1H), 7.69 – 7.60 (m, 2H), 7.60 – 7.52 (m, 2H), 7.42 – 7.29 (m, 3H), 7.24 – 7.17 (m, 1H), 7.08 – 6.93 (m, 2H), 6.25 (s, 1H), 6.08 (ddt,  $J$  = 16.4, 11.8, 6.0 Hz, 1H), 5.22 (dd,  $J$  = 10.2, 1.9 Hz, 1H), 5.15 – 5.04 (m, 1H), 3.69 (d,  $J$  = 5.8 Hz, 2H).

$^{13}\text{C}$  NMR (100 MHz,  $\text{CDCl}_3$ )  $\delta$  162.90 (d,  $J$  = 250.9 Hz), 156.65, 144.19 (d,  $J$  = 8.0 Hz), 135.41, 134.19 (d,  $J$  = 8.6 Hz), 132.95, 131.76, 131.58, 130.58, 130.03, 128.36, 128.26, 128.06, 124.94, 123.22, 118.82, 118.34, 117.15 (d,  $J$  = 4.0 Hz), 116.52 (d,  $J$  = 22.1 Hz), 113.81 (d,  $J$  = 22.1 Hz), 103.07, 98.87, 89.52, 84.63, 38.74.

HRMS (ESI)  $m/z$  Calcd for  $\text{C}_{29}\text{H}_{18}\text{FO}[\text{M} - \text{H}]^-$ : 401.1347, Found: 401.1329.

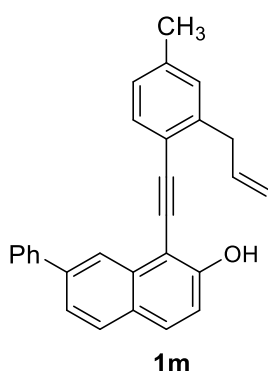

### 1-((2-allyl-4-methylphenyl)ethynyl)-7-phenylnaphthalen-2-ol (**1m**)

Compound **1m** is an unknown compound. The compound was synthesized in 79% yield (444 mg, 1.19 mmol) following the general procedure (**Method A**) and was purified by silica gel column chromatography using PE:EA (30:1 to 15:1) as eluent.

White solid. ( $R_f$  = 0.5, PE/EA = 5:1)

**<sup>1</sup>H NMR** (400 MHz, CDCl<sub>3</sub>) δ 8.39 (s, 1H), 7.84 (d, *J* = 8.4 Hz, 1H), 7.81 – 7.71 (m, 3H), 7.67 – 7.61 (m, 1H), 7.53 (d, *J* = 7.7 Hz, 1H), 7.48 (t, *J* = 7.6 Hz, 2H), 7.38 (t, *J* = 7.3 Hz, 1H), 7.21 (d, *J* = 8.9 Hz, 1H), 7.15 – 7.04 (m, 2H), 6.29 (s, 1H), 6.12 (m, 1H), 5.20 – 5.11 (m, 1H), 5.12 – 5.03 (m, 1H), 3.70 (d, *J* = 6.0 Hz, 2H), 2.38 (s, 3H).

**<sup>13</sup>C NMR** (100 MHz, CDCl<sub>3</sub>) δ 156.28, 141.22, 141.04, 140.03, 139.39, 136.41, 133.76, 132.22, 130.18, 130.11, 128.83, 128.79, 127.62, 127.49, 127.25, 123.70, 122.96, 119.36, 116.43, 116.36, 103.44, 100.32, 84.62, 38.87, 21.55.

**HRMS (ESI)** *m/z* Calcd for C<sub>28</sub>H<sub>21</sub>O<sup>+</sup>[M - H]<sup>+</sup>: 373.1598, Found: 373.1588.

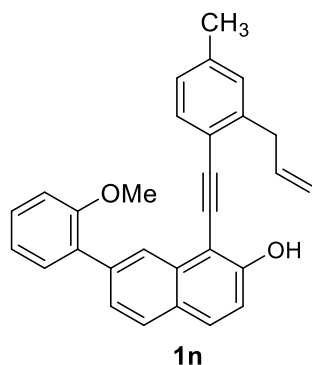

#### 1-((2-allyl-4-methylphenyl)ethynyl)-7-(2-methoxyphenyl)naphthalen-2-ol (1n)

Compound **1n** is an unknown compound. The compound was synthesized in 70% yield (425 mg, 1.05 mmol) following the general procedure (**Method A**) and was purified by silica gel column chromatography using PE:EA (30:1 to 15:1) as eluent.

colorless oil. (*R<sub>f</sub>* = 0.4, PE/EA = 5:1)

**<sup>1</sup>H NMR** (400 MHz, CDCl<sub>3</sub>) δ 8.32 (s, 1H), 7.81 – 7.70 (m, 2H), 7.60 (d, *J* = 8.4 Hz, 1H), 7.48 (d, *J* = 7.8 Hz, 1H), 7.45 (d, *J* = 5.7 Hz, 1H), 7.34 (t, *J* = 7.8 Hz, 1H), 7.20 (d, *J* = 8.9 Hz, 1H), 7.10 – 7.01 (m, 3H), 6.99 (d, *J* = 8.2 Hz, 1H), 6.27 (s, 1H), 6.06 (ddt, *J* = 16.5, 9.9, 6.0 Hz, 1H), 5.12 – 4.97 (m, 2H), 3.80 (s, 3H), 3.64 (d, *J* = 6.0 Hz, 2H), 2.34 (s, 3H).

**<sup>13</sup>C NMR** (100 MHz, CDCl<sub>3</sub>) δ 156.60, 156.02, 141.13, 139.22, 137.83, 136.40, 133.51, 132.18, 131.15, 130.61, 130.14, 130.06, 128.83, 127.52, 127.40, 127.17, 126.26, 125.24, 120.90, 119.43, 116.30, 116.17, 111.19, 103.33, 100.04, 84.80, 55.53, 38.79, 21.50.

**HRMS (ESI)** *m/z* Calcd for C<sub>29</sub>H<sub>23</sub>O<sub>2</sub><sup>+</sup>[M - H]<sup>+</sup>: 403.1704, Found: 403.1700.

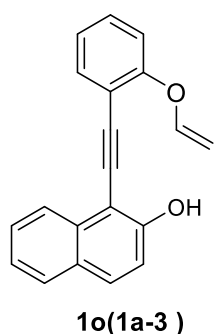

#### 1-((2-vinyloxyphenyl)ethynyl)naphthalen-2-ol (1o (1a-3))

Compound **1a-3 (1o)** is an unknown compound. The compound was synthesized in 88% yield (378 mg, 1.32 mmol) following the general procedure (**Method B**) and was purified by silica gel column chromatography using PE:EA (30:1 to 15:1) as eluent.

White solid. ( $R_f$  = 0.5, PE/EA = 5:1)

$^1\text{H NMR}$  (600 MHz,  $\text{CDCl}_3$ )  $\delta$  8.22 (d,  $J$  = 8.3 Hz, 1H), 7.77 (t,  $J$  = 7.7 Hz, 2H), 7.62 (d,  $J$  = 7.6 Hz, 1H), 7.55 (t,  $J$  = 7.7 Hz, 1H), 7.39 – 7.33 (m, 2H), 7.24 (d,  $J$  = 8.7 Hz, 1H), 7.14 (t,  $J$  = 7.6 Hz, 1H), 7.08 (d,  $J$  = 8.3 Hz, 1H), 6.84 (s, 1H), 6.76 (dd,  $J$  = 13.7, 6.0 Hz, 1H), 4.97 (dd,  $J$  = 13.7, 2.0 Hz, 1H), 4.61 (dd,  $J$  = 6.0, 2.0 Hz, 1H).

$^{13}\text{C NMR}$  (150 MHz,  $\text{CDCl}_3$ )  $\delta$  156.80, 156.58, 147.65, 133.05, 132.03, 130.71, 129.82, 128.33, 128.22, 127.31, 124.98, 123.98, 123.38, 116.46, 116.04, 113.93, 102.96, 96.95, 96.40, 87.81.

**HRMS (ESI)**  $m/z$  Calcd for  $\text{C}_{20}\text{H}_{13}\text{O}_2$  [M - H] $^-$ : 285.0921, Found: 285.0909.

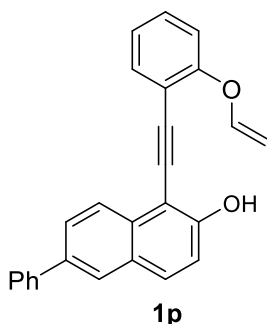

#### 6-phenyl-1-((2-(vinylloxy)phenyl)ethynyl)naphthalen-2-ol (**1p**)

Compound **1p** is an unknown compound. The compound was synthesized in 85% yield (462 mg, 1.28 mmol) following the general procedure (**Method B**) and was purified by silica gel column chromatography using PE:EA (30:1 to 15:1) as eluent.

White solid. ( $R_f$  = 0.5, PE/EA = 5:1)

$^1\text{H NMR}$  (400 MHz,  $\text{CDCl}_3$ )  $\delta$  8.28 (d,  $J$  = 8.6 Hz, 1H), 7.97 (s, 1H), 7.81 (d,  $J$  = 8.8 Hz, 2H), 7.71 (d,  $J$  = 7.6 Hz, 2H), 7.63 (d,  $J$  = 7.1 Hz, 1H), 7.48 (t,  $J$  = 7.6 Hz, 2H), 7.42 – 7.30 (m, 2H), 7.26 (d,  $J$  = 8.9 Hz, 1H), 7.15 (t,  $J$  = 7.5 Hz, 1H), 7.09 (d,  $J$  = 8.2 Hz, 1H), 6.86 (s, 1H), 6.77 (dd,  $J$  = 13.7, 6.0 Hz, 1H), 4.99 (dd,  $J$  = 13.7, 2.0 Hz, 1H), 4.62 (dd,  $J$  = 6.0, 2.1 Hz, 1H).

$^{13}\text{C NMR}$  (100 MHz,  $\text{CDCl}_3$ )  $\delta$  156.87, 156.62, 147.64, 140.90, 136.81, 132.23, 132.05, 130.96, 129.87, 128.84, 128.59, 127.22, 126.93, 126.14, 125.55, 123.39, 116.89, 116.03, 113.88, 102.92, 96.99, 96.45, 87.77.

**HRMS (ESI)**  $m/z$  Calcd for  $\text{C}_{26}\text{H}_{17}\text{O}_2$  [M - H] $^-$ : 361.1234, Found: 361.1231.

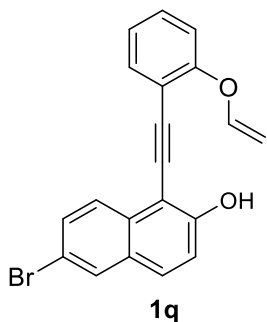

#### 6-bromo-1-((2-(vinylloxy)phenyl)ethynyl)naphthalen-2-ol (**1q**)

Compound **1q** is an unknown compound. The compound was synthesized in 86% yield (471 mg, 1.29 mmol) following the general procedure (**Method B**) and was purified by silica gel column chromatography using PE:EA (30:1 to 15:1) as eluent.



Gray solid. ( $R_f$  = 0.5, PE/EA = 5:1)

**$^1\text{H NMR}$**  (400 MHz,  $\text{CDCl}_3$ )  $\delta$  8.07 (d,  $J$  = 8.8 Hz, 1H), 7.91 (d,  $J$  = 2.0 Hz, 1H), 7.65 (d,  $J$  = 8.9 Hz, 1H), 7.63 – 7.56 (m, 2H), 7.36 (td,  $J$  = 7.9, 1.7 Hz, 1H), 7.24 (d,  $J$  = 7.7 Hz, 1H), 7.14 (td,  $J$  = 7.6, 1.1 Hz, 1H), 7.11 – 7.04 (m, 1H), 6.84 (s, 1H), 6.76 (dd,  $J$  = 13.7, 6.0 Hz, 1H), 4.97 (dd,  $J$  = 13.6, 2.0 Hz, 1H), 4.62 (dd,  $J$  = 6.0, 2.0 Hz, 1H).

**$^{13}\text{C NMR}$**  (100 MHz,  $\text{CDCl}_3$ )  $\delta$  156.93, 156.67, 147.54, 132.02, 131.57, 130.47, 130.15, 130.06, 129.59, 129.44, 126.81, 123.40, 117.67, 117.58, 115.97, 113.59, 103.29, 97.37, 96.58, 87.17.

**HRMS (ESI)**  $m/z$  Calcd for  $\text{C}_{20}\text{H}_{12}\text{BrO}_2$  [ $\text{M} - \text{H}$ ] $^-$ : 363.0026, Found: 363.0012.

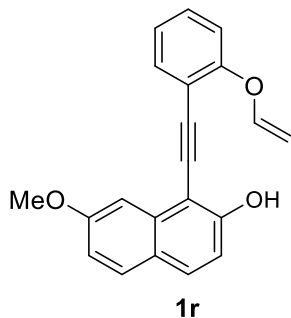

#### 7-methoxy-1-((2-(vinylloxy)phenyl)ethynyl)naphthalen-2-ol (**1r**)

Compound **1r** is an unknown compound. The compound was synthesized in 83% yield (394 mg, 1.25 mmol) following the general procedure (**Method B**) and was purified by silica gel column chromatography using PE:EA (30:1 to 15:1) as eluent.

Gray solid. ( $R_f$  = 0.5, PE/EA = 5:1)

**$^1\text{H NMR}$**  (400 MHz,  $\text{CDCl}_3$ )  $\delta$  7.71 – 7.64 (m, 2H), 7.61 (d,  $J$  = 7.6 Hz, 1H), 7.51 (d,  $J$  = 2.6 Hz, 1H), 7.36 (t,  $J$  = 7.9 Hz, 1H), 7.14 (t,  $J$  = 7.6 Hz, 1H), 7.09 (d,  $J$  = 2.6 Hz, 1H), 7.07 (d,  $J$  = 2.1 Hz, 1H), 7.03 (dd,  $J$  = 8.9, 2.5 Hz, 1H), 6.80 (s, 1H), 6.76 (dd,  $J$  = 13.7, 6.0 Hz, 1H), 4.96 (dd,  $J$  = 13.7, 2.0 Hz, 1H), 4.62 (dd,  $J$  = 6.0, 2.0 Hz, 1H), 3.98 (s, 3H).

**$^{13}\text{C NMR}$**  (100 MHz,  $\text{CDCl}_3$ )  $\delta$  159.14, 157.29, 156.50, 147.60, 134.61, 132.01, 130.53, 129.81, 129.77, 123.58, 123.33, 116.21, 116.01, 113.86, 113.80, 103.89, 102.14, 97.03, 96.65, 87.84, 55.35.

**HRMS (ESI)**  $m/z$  Calcd for  $\text{C}_{20}\text{H}_{15}\text{O}_3$  [ $\text{M} - \text{H}$ ] $^-$ : 315.1027, Found: 315.1014.

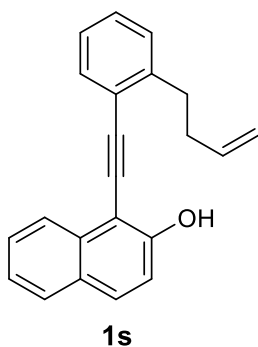

#### 1-((2-(but-3-en-1-yl)phenyl)ethynyl)naphthalen-2-ol (**1s**)

Compound **1s** is an unknown compound. The compound was synthesized in 80% yield (358 mg, 1.2 mmol) following the general procedure (**Method A**) and was purified by silica gel column chromatography using PE:EA (30:1 to 15:1) as eluent.

Pale yellow solid. ( $R_f$  = 0.6, PE/EA = 5:1)

**<sup>1</sup>H NMR** (400 MHz, CDCl<sub>3</sub>) δ 8.19 (d, *J* = 8.3 Hz, 1H), 7.78 (t, *J* = 7.4 Hz, 2H), 7.63 (d, *J* = 7.4 Hz, 1H), 7.54 (t, *J* = 7.6 Hz, 1H), 7.39 (t, *J* = 7.5 Hz, 1H), 7.35 – 7.28 (m, 2H), 7.26 – 7.21 (m, 2H), 6.18 (s, 1H), 5.94 (ddt, *J* = 13.2, 10.2, 6.5 Hz, 1H), 5.07 (dd, *J* = 29.5, 13.7 Hz, 2H), 3.06 (t, *J* = 8.0 Hz, 2H), 2.52 (q, *J* = 7.2, 6.6 Hz, 2H).

**<sup>13</sup>C NMR** (100 MHz, CDCl<sub>3</sub>) δ 155.83, 143.43, 137.70, 133.50, 132.37, 130.65, 129.07, 128.94, 128.47, 128.31, 127.43, 126.13, 124.87, 124.08, 122.09, 116.38, 115.31, 103.07, 100.02, 85.04, 34.83, 34.45.

**HRMS (ESI)** *m/z* Calcd for C<sub>22</sub>H<sub>17</sub>O<sup>+</sup>[M - H]: 297.1285, Found: 297.1276.

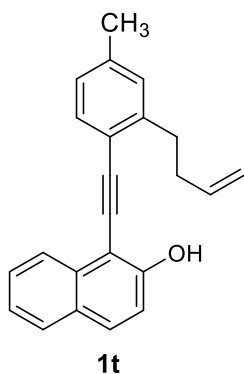

#### 1-((2-(but-3-en-1-yl)-4-methylphenyl)ethynyl)naphthalen-2-ol (**1t**)

Compound **1t** is an unknown compound. The compound was synthesized in 79% yield (370 mg, 1.19 mmol) following the general procedure (**Method A**) and was purified by silica gel column chromatography using PE:EA (30:1 to 15:1) as eluent.

Pale yellow solid. (*R<sub>f</sub>* = 0.6, PE/EA = 5:1)

**<sup>1</sup>H NMR** (400 MHz, CDCl<sub>3</sub>) δ 8.30 (d, *J* = 8.3 Hz, 1H), 7.87 – 7.78 (m, 2H), 7.65 – 7.56 (m, 2H), 7.45 (t, *J* = 7.6 Hz, 1H), 7.32 (d, *J* = 8.9 Hz, 1H), 7.16 (s, 1H), 7.11 (d, *J* = 7.9 Hz, 1H), 6.34 (s, 1H), 6.12 – 5.97 (m, 1H), 5.19 (dd, *J* = 30.7, 13.7 Hz, 2H), 3.09 (t, *J* = 8.0 Hz, 2H), 2.60 (q, *J* = 7.5 Hz, 2H), 2.44 (s, 3H).

**<sup>13</sup>C NMR** (100 MHz, CDCl<sub>3</sub>) δ 155.63, 143.22, 139.03, 137.76, 133.45, 132.17, 130.35, 129.76, 128.41, 128.22, 127.28, 126.89, 124.86, 123.94, 119.00, 116.29, 115.13, 103.26, 100.23, 84.35, 34.86, 34.34, 21.48.

**HRMS (ESI)** *m/z* Calcd for C<sub>23</sub>H<sub>19</sub>O<sup>+</sup>[M - H]: 311.1441, Found: 311.1432.

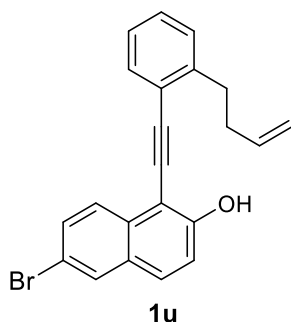

#### 6-bromo-1-((2-(but-3-en-1-yl)phenyl)ethynyl)naphthalen-2-ol (**1u**)

Compound **1u** is an unknown compound. The compound was synthesized in 71% yield (402 mg, 1.07 mmol) following the general procedure (**Method A**) and was purified by silica gel column chromatography using PE:EA (30:1 to 15:1) as eluent.

Pale yellow solid. (*R<sub>f</sub>* = 0.5, PE/EA = 5:1)

**<sup>1</sup>H NMR** (400 MHz, CDCl<sub>3</sub>) δ 8.05 (d, *J* = 8.8 Hz, 1H), 7.94 (d, *J* = 2.0 Hz, 1H), 7.68 (d, *J* = 9.0 Hz, 1H), 7.66 – 7.54 (m, 2H), 7.39 – 7.26 (m, 3H), 7.26 – 7.22 (m, 1H), 6.19 (s, 1H), 5.93 (ddt, *J* = 16.8, 10.0, 6.5 Hz, 1H), 5.16 – 5.00 (m, 2H), 3.09 – 3.00 (m, 2H), 2.51 (q, *J* = 7.6, 7.2 Hz, 2H).

**<sup>13</sup>C NMR** (100 MHz, CDCl<sub>3</sub>) δ 155.92, 143.43, 137.60, 132.35, 131.98, 130.53, 130.18, 129.50, 129.11, 129.05, 126.63, 126.14, 121.75, 117.74, 117.46, 115.33, 103.34, 100.36, 84.39, 34.78, 34.35.

**HRMS (ESI)** *m/z* Calcd for C<sub>22</sub>H<sub>16</sub>BrO<sup>+</sup>[M - H]<sup>+</sup>: 375.0390, Found: 375.0372.

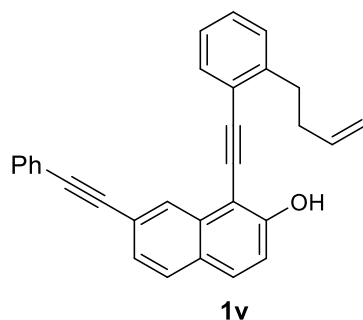

#### 1-((2-(but-3-en-1-yl)phenyl)ethynyl)-7-(phenylethynyl)naphthalen-2-ol (**1v**)

Compound **1v** is an unknown compound. The compound was synthesized in 76% yield (454 mg, 1.14 mmol) following the general procedure (**Method A**) and was purified by silica gel column chromatography using PE:EA (30:1 to 15:1) as eluent.

Pale yellow solid. (*R<sub>f</sub>* = 0.6, PE/EA = 5:1)

**<sup>1</sup>H NMR** (600 MHz, CDCl<sub>3</sub>) δ 8.37 (s, 1H), 7.76 (dd, *J* = 8.7, 3.4 Hz, 2H), 7.66 (d, *J* = 7.6 Hz, 1H), 7.58 (d, *J* = 7.1 Hz, 2H), 7.50 (d, *J* = 8.3 Hz, 1H), 7.38 – 7.33 (m, 4H), 7.31 (d, *J* = 7.4 Hz, 1H), 7.28 (d, *J* = 7.6 Hz, 1H), 7.24 (d, *J* = 8.5 Hz, 1H), 6.21 (s, 1H), 6.01 – 5.92 (m, 1H), 5.10 (d, *J* = 17.0 Hz, 1H), 4.99 (d, *J* = 10.2 Hz, 1H), 3.08 (t, *J* = 7.9 Hz, 2H), 2.56 (q, *J* = 7.4 Hz, 2H).

**<sup>13</sup>C NMR** (150 MHz, CDCl<sub>3</sub>) δ 156.31, 143.52, 137.55, 133.24, 132.47, 131.67, 130.32, 129.09, 129.04, 128.33, 127.85, 126.79, 126.12, 123.21, 122.22, 121.95, 117.02, 115.53, 103.02, 100.50, 90.46, 89.92, 84.67, 34.85, 34.50.

**HRMS (ESI)** *m/z* Calcd for C<sub>30</sub>H<sub>21</sub>O<sup>+</sup>[M - H]<sup>+</sup>: 397.1598, Found: 397.1584.

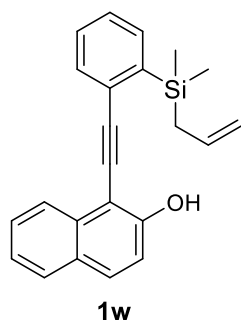

#### 1-((2-(allyldimethylsilyl)phenyl)ethynyl)naphthalen-2-ol (**1w**)

Compound **1w** is an unknown compound. The compound was synthesized in 74% yield (380 mg, 1.11 mmol) following the general procedure (**Method C**) and was purified by silica gel column chromatography using PE:EA (30:1 to 15:1) as eluent.

Orange oil. (*R<sub>f</sub>* = 0.4, PE/EA = 5:1)

**<sup>1</sup>H NMR** (400 MHz, CDCl<sub>3</sub>) δ 8.20 (d, *J* = 8.4 Hz, 1H), 7.78 (dd, *J* = 8.6, 5.2 Hz, 2H), 7.69 (d, *J* = 7.1 Hz, 1H), 7.59 – 7.51 (m, 2H), 7.44 – 7.34 (m, 3H), 7.26 – 7.20 (m, 1H), 6.19 (s, 1H), 5.79 (td, *J* = 17.7, 8.1 Hz, 1H), 4.91 – 4.79 (m, 2H), 2.00 (d, *J* = 8.1 Hz, 2H), 0.44 (s, 6H).

**<sup>13</sup>C NMR** (100 MHz, CDCl<sub>3</sub>) δ 156.12, 140.66, 134.54, 134.36, 133.64, 133.47, 130.77, 129.09, 128.50, 128.33, 128.07, 127.69, 127.40, 124.83, 124.06, 116.45, 113.76, 102.80, 102.27, 84.49, 23.14, -2.92.

**HRMS (ESI)** *m/z* Calcd for C<sub>23</sub>H<sub>21</sub>OSi<sup>[M - H]<sup>-</sup></sup>: 341.1367, Found: 341.1354.

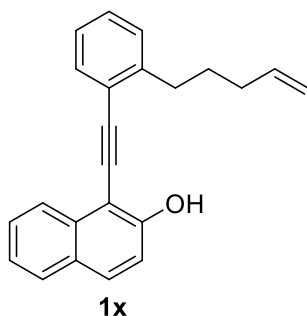

### 1-((2-(pent-4-en-1-yl)phenyl)ethynyl)naphthalen-2-ol (**1x**)

Compound **1x** is an unknown compound. The compound was synthesized in 70% yield (718 mg, 2.3 mmol) following the general procedure (**Method A**) and was purified by silica gel column chromatography using PE:EA (30:1 to 15:1) as eluent. Pale yellow oil. (*R<sub>f</sub>* = 0.6, PE/EA = 5:1)

**<sup>1</sup>H NMR** (400 MHz, CDCl<sub>3</sub>) δ 8.18 (d, *J* = 8.3 Hz, 1H), 7.74 (d, *J* = 9.0 Hz, 2H), 7.58 (d, *J* = 7.5 Hz, 1H), 7.52 (t, *J* = 7.5 Hz, 1H), 7.35 (t, *J* = 7.4 Hz, 1H), 7.31 – 7.10 (m, 4H), 6.20 (s, 1H), 5.83 (ddt, *J* = 16.9, 10.2, 6.6 Hz, 1H), 5.04 (d, *J* = 17.1 Hz, 1H), 4.96 (d, *J* = 10.1 Hz, 1H), 3.00 – 2.83 (m, 2H), 2.17 (q, *J* = 7.1 Hz, 2H), 1.85 (p, *J* = 7.6 Hz, 2H).

**<sup>13</sup>C NMR** (100 MHz, CDCl<sub>3</sub>) δ 155.82, 144.07, 138.25, 133.53, 132.41, 130.60, 128.98, 128.90, 128.49, 128.31, 127.36, 125.97, 124.81, 124.04, 122.03, 116.36, 115.03, 103.13, 100.11, 84.94, 34.45, 33.50, 29.88.

**HRMS (ESI)** *m/z* Calcd for C<sub>23</sub>H<sub>19</sub>O<sup>[M - H]<sup>-</sup></sup>: 311.1441, Found: 311.1434.

### VII. <sup>1</sup>H, <sup>13</sup>C NMR and HRMS data of compounds (**2a-4a**)

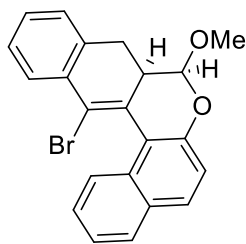

### 14-bromo-8-methoxy-8a,9-dihydro-8H-benzo[f]naphtho[2,3-c]chromene (**2a**)

Compound **2a** was synthesized in 49% yield (116 mg, 0.6 mmol scale) under condition [B]. **2a** was purified by silica gel column chromatography using PE:EA (60:1 to 50:1) as eluent.

White solid. (*R<sub>f</sub>* = 0.5, PE/EA = 20:1)

**<sup>1</sup>H NMR** (400 MHz, CDCl<sub>3</sub>) δ 7.92 (d, *J* = 8.5 Hz, 1H), 7.85 – 7.74 (m, 3H), 7.49 (t, *J* = 7.0 Hz, 1H), 7.37 (t, *J* = 6.9 Hz, 1H), 7.30 – 7.17 (m, 2H), 7.18 – 7.11 (m, 2H), 4.97 (d, *J* = 3.8 Hz, 1H), 3.54 (s, 3H), 3.37 (dd, *J* = 16.3, 8.8 Hz, 1H), 3.27 – 3.20 (m, 1H), 3.14 (dd, *J* = 16.3, 6.3 Hz, 1H).

$^{13}\text{C}$  NMR (100 MHz,  $\text{CDCl}_3$ )  $\delta$  152.26, 133.99, 133.53, 130.25, 129.34, 129.11, 128.16, 128.10, 127.78, 127.66, 127.08, 126.53, 125.48, 123.73, 120.57, 120.08, 117.83, 104.09, 57.12, 42.15, 26.94.

HRMS (ESI)  $m/z$  Calcd for  $\text{C}_{22}\text{H}_{17}\text{BrNaO}_2^+[\text{M} + \text{Na}]^+$ : 415.0304, Found: 415.0305

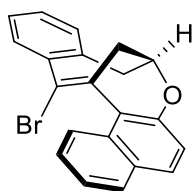

**3a**

**(S)-14-bromo-8,9-dihydro-8,15-methanobenzo[f]naphtho[2,1-b]oxonine (3a)**

Compound **3a** was synthesized in 65% yield (142 mg, 0.6 mmol scale) under condition [A]. **3a** was purified by silica gel column chromatography using PE:EA (60:1 to 50:1) as eluent.

Yellow solid. ( $R_f$  = 0.5, PE/EA = 30:1)

$^1\text{H}$  NMR (400 MHz,  $\text{CDCl}_3$ )  $\delta$  8.00 (d,  $J$  = 8.4 Hz, 1H), 7.77 (d,  $J$  = 8.1 Hz, 1H), 7.71 (d,  $J$  = 8.9 Hz, 1H), 7.57 (d,  $J$  = 7.6 Hz, 1H), 7.52 (t,  $J$  = 7.6 Hz, 1H), 7.41 – 7.32 (m, 2H), 7.27 – 7.20 (m, 1H), 7.14 (d,  $J$  = 7.5 Hz, 1H), 7.09 (d,  $J$  = 8.9 Hz, 1H), 5.34 – 5.25 (m, 1H), 3.26 – 3.11 (m, 2H), 2.81 (d,  $J$  = 12.1 Hz, 1H), 2.54 (dd,  $J$  = 12.2, 3.7 Hz, 1H).

$^{13}\text{C}$  NMR (100 MHz,  $\text{CDCl}_3$ )  $\delta$  151.65, 141.39, 136.09, 135.20, 130.13, 129.40, 129.24, 128.95, 128.64, 128.42, 127.92, 127.79, 126.70, 125.74, 123.46, 121.41, 118.12, 115.01, 84.01, 40.58, 35.24.

HRMS (APCI)  $m/z$  Calcd for  $\text{C}_{21}\text{H}_{16}\text{BrO}^+[\text{M} + \text{H}]^+$ : 363.0379, Found: 363.0366.

Optical Rotation:  $[\alpha]_{\text{D}}^{25} = -360.4^\circ$  ( $c$  = 0.9, DCM).

HPLC analysis: Chiralcel ADAD-H (Hexane/*i*-PrOH = 95:5, flow rate = 1.0 mL/min, wave length = 254 nm),  $t_{\text{R}}$  = 11.179 min (major),  $t_{\text{R}}$  = 12.278 min (minor), 97% ee.

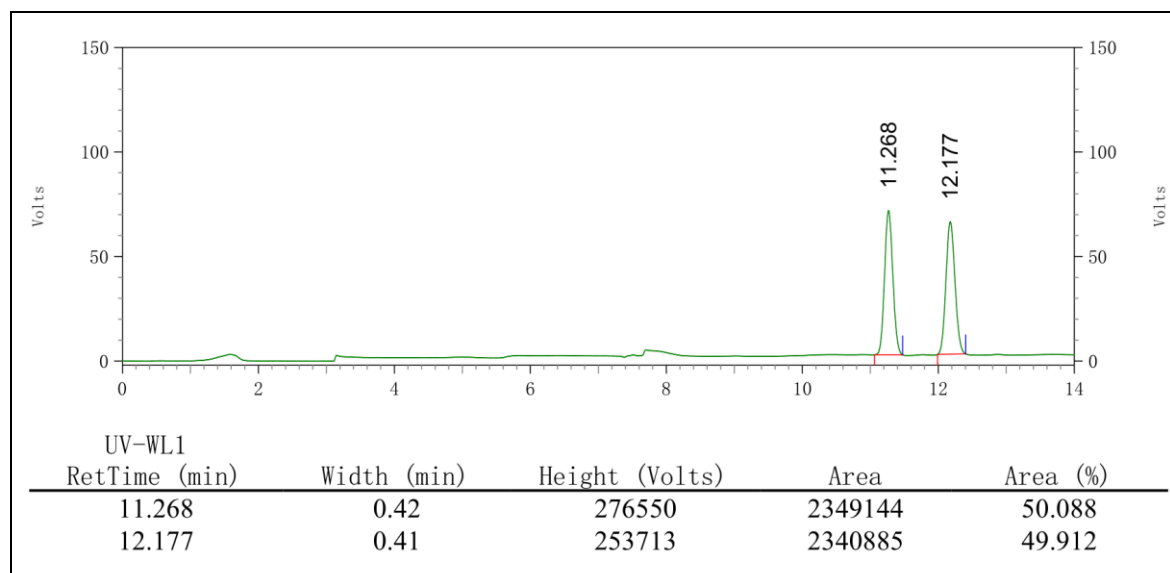

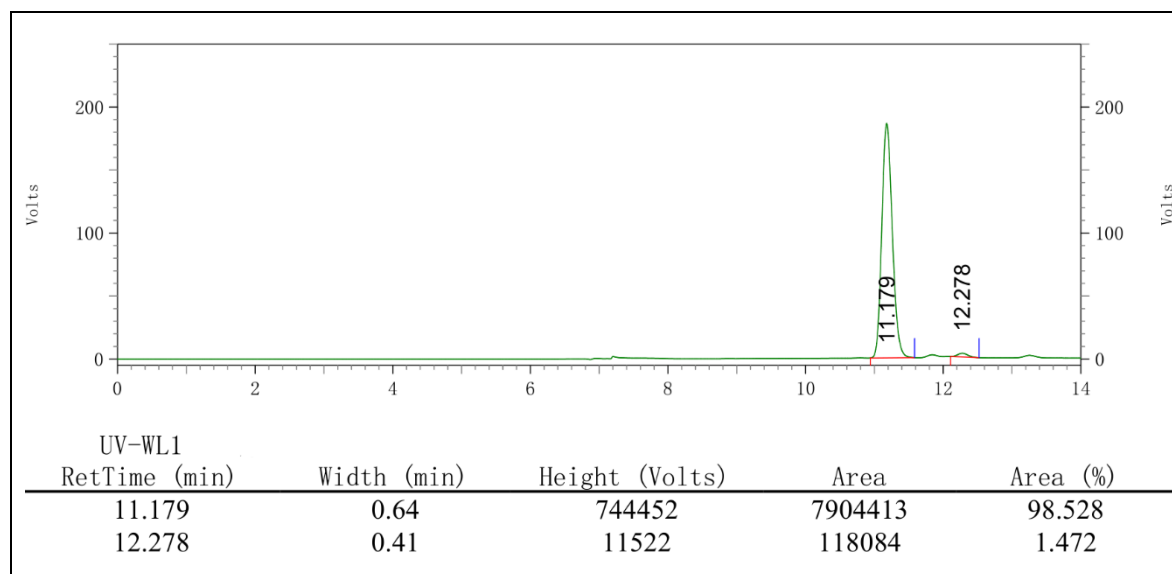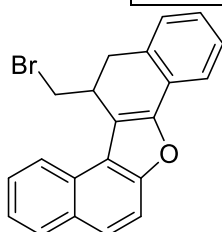

**4a**

### 13-(bromomethyl)-12,13-dihydrodinaphtho[1,2-b:1',2'-d] furan (**4a**)

Compound **4a** was synthesized in 19% yield (41 mg, 0.6 mmol scale) under condition [B]. **4a** was purified by silica gel column chromatography using PE:EA (60:1 to 50:1) as eluent.

Yellow solid. ( $R_f = 0.6$ , PE/EA = 30:1)

$^1\text{H NMR}$  (400 MHz,  $\text{CDCl}_3$ )  $\delta$  8.21 (d,  $J = 8.2$  Hz, 1H), 7.98 (d,  $J = 8.2$  Hz, 1H), 7.79 – 7.68 (m, 3H), 7.68 – 7.61 (m, 1H), 7.52 (td,  $J = 7.4, 6.9, 1.2$  Hz, 1H), 7.41 – 7.32 (m, 2H), 7.31 – 7.26 (m, 1H), 4.07 – 3.97 (m, 1H), 3.76 – 3.68 (m, 1H), 3.55 (dd,  $J = 16.3, 1.5$  Hz, 1H), 3.39 (dd,  $J = 16.2, 6.9$  Hz, 1H), 3.24 (t,  $J = 10.9$  Hz, 1H).

$^{13}\text{C NMR}$  (100 MHz,  $\text{CDCl}_3$ )  $\delta$  152.83, 151.33, 132.40, 130.80, 129.32, 129.18, 128.14, 127.79, 127.27, 126.76, 126.65, 125.62, 124.62, 122.79, 120.97, 120.48, 115.96, 112.54, 35.48, 33.63, 31.67.

**HRMS (APCI)**  $m/z$  Calcd for  $\text{C}_{21}\text{H}_{16}\text{BrO}^+[\text{M} + \text{H}]^+$ : 363.0379, Found: 363.0366.

**HPLC analysis:** Chiralcel AD-H (Hexane/*i*-PrOH = 99:1, flow rate = 1.0 mL/min, wave length = 254 nm),  $t_R = 6.167$  min (major),  $t_R = 7.227$  min (minor), 93% ee.

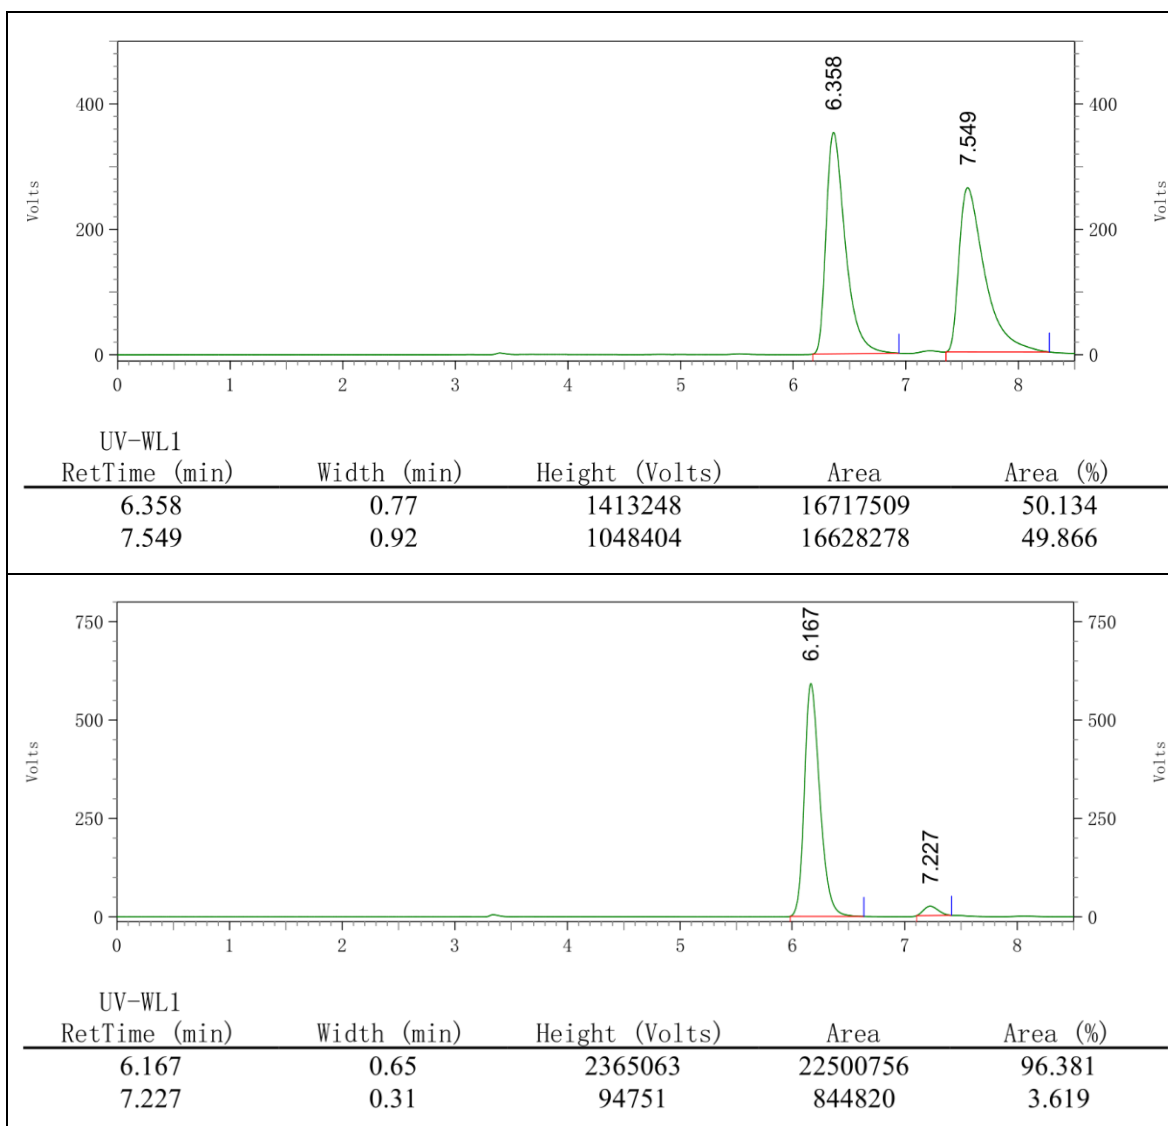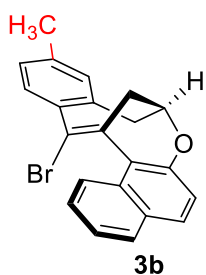

**(S)-14-bromo-11-methyl-8,9-dihydro-8,15-methanobenzo[f]naphtho[2,1-b]oxonine (3b)**

Compound **3b** was synthesized in 65% yield (147 mg, 0.6 mmol scale) under condition [A]. **3b** was purified by silica gel column chromatography using PE:EA (60:1 to 50:1) as eluent.

Yellow solid. ( $R_f$  = 0.5, PE/EA = 30:1)

$^1\text{H NMR}$  (600 MHz,  $\text{CDCl}_3$ )  $\delta$  8.00 (d,  $J$  = 8.3 Hz, 1H), 7.76 (d,  $J$  = 8.2 Hz, 1H), 7.71 (d,  $J$  = 8.8 Hz, 1H), 7.51 (t,  $J$  = 7.6 Hz, 1H), 7.46 (d,  $J$  = 7.7 Hz, 1H), 7.35 (t,  $J$  = 7.5 Hz, 1H), 7.19 (d,  $J$  = 7.7 Hz, 1H), 7.08 (d,  $J$  = 8.9 Hz, 1H), 6.97 (s, 1H), 5.35 – 5.24 (m, 1H), 3.19 – 3.12 (m, 2H), 2.82 (d,  $J$  = 12.1 Hz, 1H), 2.53 (dd,  $J$  = 12.2, 3.6 Hz, 1H), 2.36 (s, 3H).

$^{13}\text{C NMR}$  (150 MHz,  $\text{CDCl}_3$ )  $\delta$  151.62, 139.03, 138.56, 135.95, 134.76, 130.07, 129.99, 129.31, 128.74, 128.47, 128.36, 127.90, 126.78, 125.69, 123.44, 121.54, 118.11, 115.34, 84.03, 40.62, 35.33, 21.39.

**HRMS (APCI)**  $m/z$  Calcd for  $C_{22}H_{18}BrO^+[M + H]^+$ : 377.0536, Found: 377.0525.

**Optical Rotation:**  $[\alpha]_D^{25} = -290.4^\circ$  ( $c = 0.5$ , acetone).

**HPLC analysis:** Chiralcel AD-H (Hexane/*i*-PrOH = 95:5, flow rate = 1.0 mL/min, wave length = 254 nm),  $t_R = 4.277$  min (major),  $t_R = 4.733$  min (minor), 94% ee.

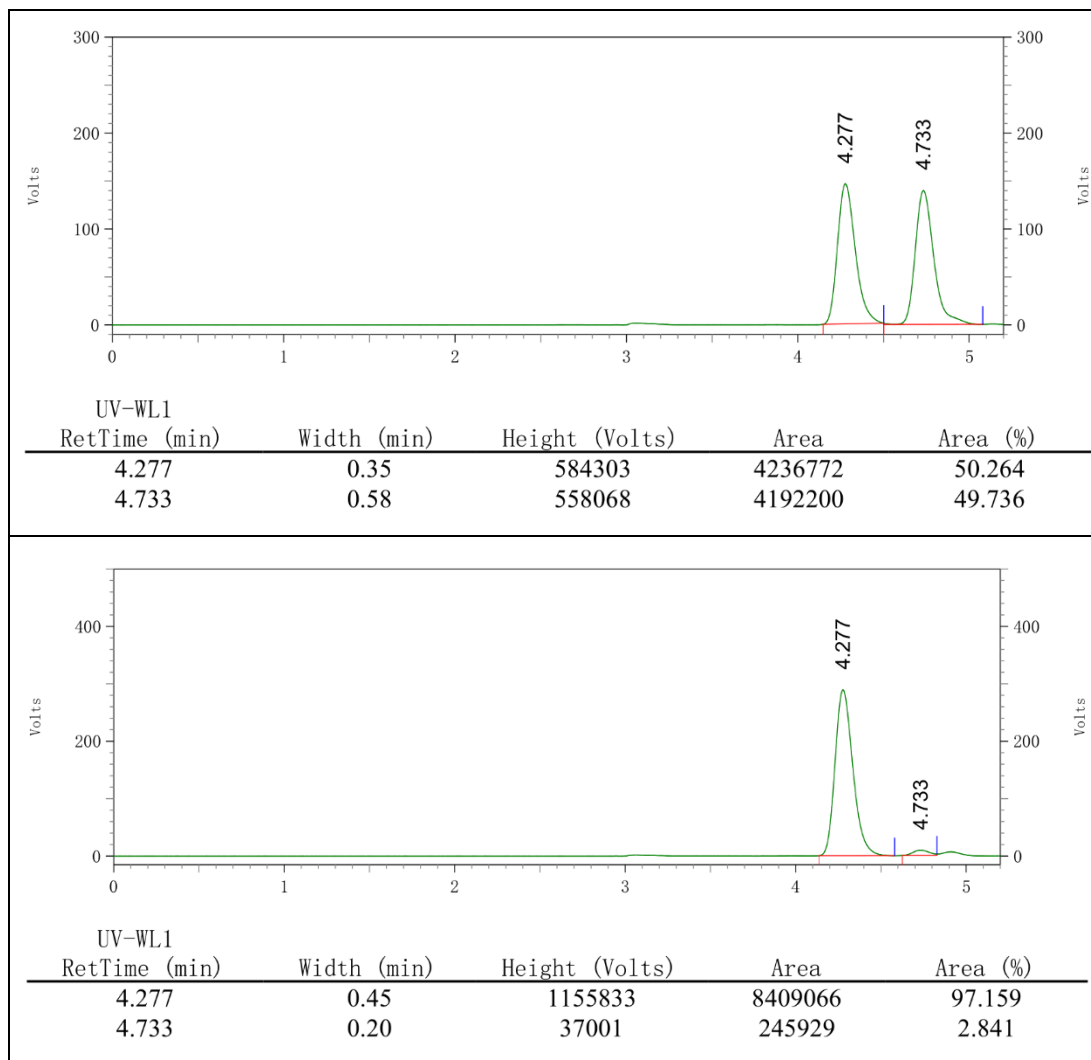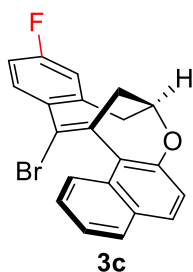

**(S)-14-bromo-11-fluoro-8,9-dihydro-8,15-methanobenzo[f]naphtho[2,1-b]oxonine (3c)**

Compound **3c** was synthesized in 66% yield (151 mg, 0.6 mmol scale) under condition [A]. **3c** was purified by silica gel column chromatography using PE:EA (60:1 to 50:1) as eluent.

Pale yellow solid. ( $R_f = 0.4$ , PE/EA = 30:1)



**<sup>1</sup>H NMR** (400 MHz, CDCl<sub>3</sub>) δ 7.98 (d, *J* = 8.3 Hz, 1H), 7.85 – 7.63 (m, 2H), 7.64 – 7.43 (m, 2H), 7.36 (t, *J* = 7.3 Hz, 1H), 7.08 (d, *J* = 8.7 Hz, 2H), 6.89 (d, *J* = 8.9 Hz, 1H), 5.36 – 5.23 (m, 1H), 3.26 – 3.06 (m, 2H), 2.78 (d, *J* = 12.1 Hz, 1H), 2.56 (d, *J* = 12.1 Hz, 1H).

**<sup>13</sup>C NMR** (100 MHz, CDCl<sub>3</sub>) δ 162.17 (d, *J* = 249.6 Hz), 151.50, 138.71 (d, *J* = 7.9 Hz), 137.37 (d, *J* = 3.1 Hz), 135.50, 131.96 (d, *J* = 8.8 Hz), 129.52, 128.59, 128.47, 127.95, 126.64, 125.80, 123.54, 121.26, 118.07, 116.40 (d, *J* = 21.9 Hz), 114.55 (d, *J* = 21.7 Hz), 114.10, 83.54, 40.64, 35.26.

**HRMS (APCI)** *m/z* Calcd for C<sub>21</sub>H<sub>15</sub>BrFO<sup>+</sup>[M + H]<sup>+</sup>: 381.0285, Found: 381.0276.

**Optical Rotation:** [ $\alpha$ ]<sub>D</sub><sup>25</sup> = -335.8° (*c* = 0.5, acetone).

**HPLC analysis:** Chiralcel IA-H (Hexane/*i*-PrOH = 98:2, flow rate = 1.0 mL/min, wave length = 254 nm), *t*<sub>R</sub> = 5.747 min (major), *t*<sub>R</sub> = 6.239 min (minor), 95% ee.

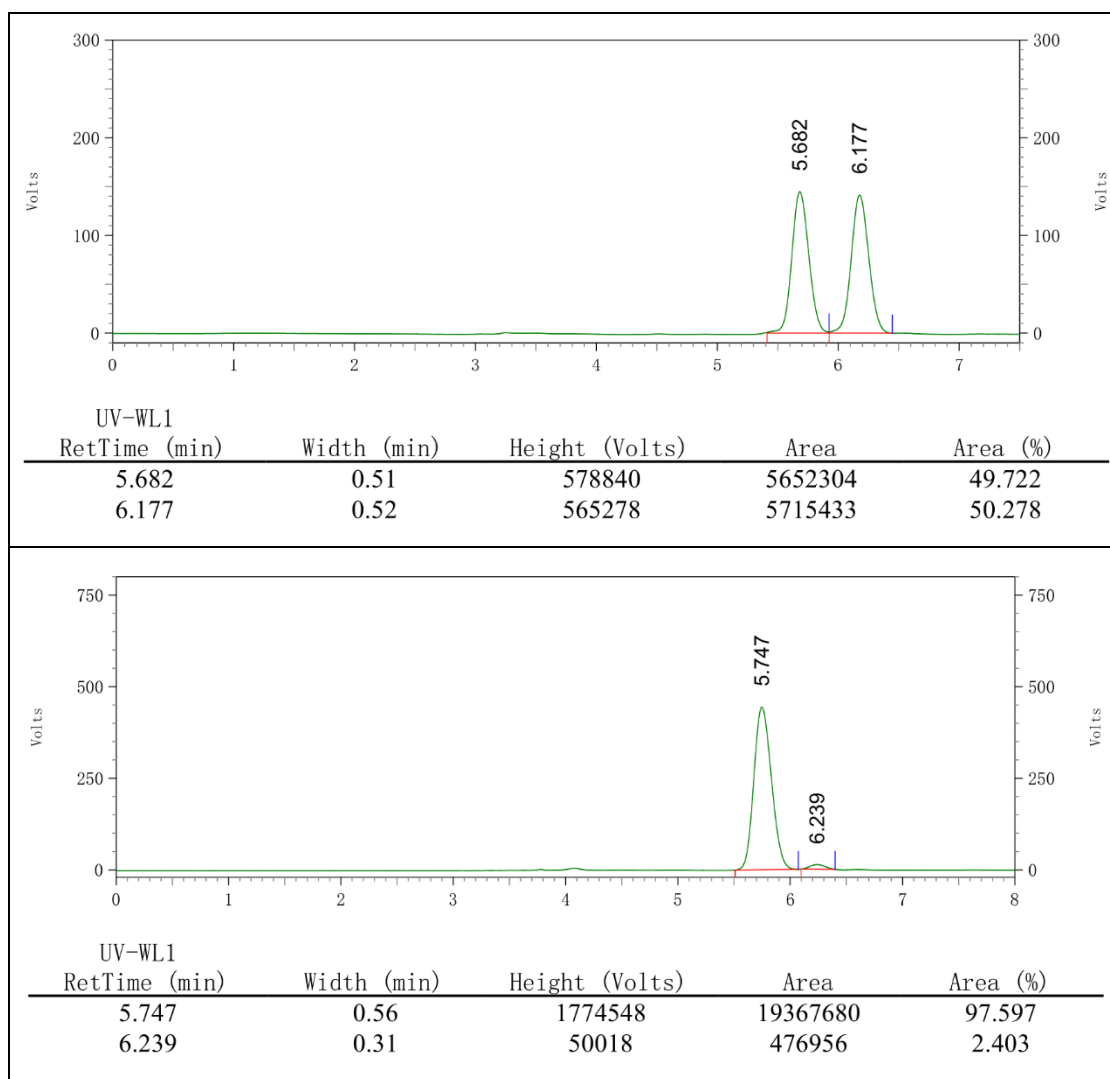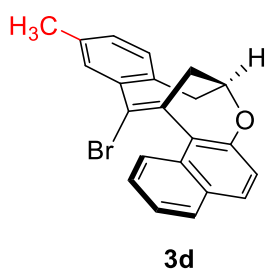

**(S)-14-bromo-12-methyl-8,9-dihydro-8,15-methanobenzof[naphtho[2,1-b]oxonine (3d)**

Compound **3d** was synthesized in 62% yield (140 mg, 0.6 mmol scale) under condition [A]. **3d** was purified by silica gel column chromatography using PE:EA (60:1 to 50:1) as eluent.

Yellow solid. ( $R_f = 0.6$ , PE/EA = 20:1)

$^1\text{H NMR}$  (400 MHz,  $\text{CDCl}_3$ )  $\delta$  7.99 (d,  $J = 8.4$  Hz, 1H), 7.77 (d,  $J = 8.1$  Hz, 1H), 7.71 (d,  $J = 8.9$  Hz, 1H), 7.52 (ddd,  $J = 8.4, 6.8, 1.3$  Hz, 1H), 7.40 (s, 1H), 7.38 – 7.33 (m, 1H), 7.15 – 6.97 (m, 3H), 5.34 – 5.23 (m, 1H), 3.16 (qd,  $J = 14.5, 7.2$  Hz, 2H), 2.82 (dd,  $J = 12.1, 1.8$  Hz, 1H), 2.54 (dd,  $J = 12.1, 3.7$  Hz, 1H), 2.40 (s, 3H).

$^{13}\text{C NMR}$  (100 MHz,  $\text{CDCl}_3$ )  $\delta$  151.69, 141.21, 137.55, 135.04, 133.06, 130.77, 129.67, 129.35, 129.08, 128.71, 128.47, 127.92, 126.73, 125.71, 123.44, 121.53, 118.14, 115.29, 84.05, 40.18, 35.31, 21.12.

**HRMS (APCI)**  $m/z$  Calcd for  $\text{C}_{22}\text{H}_{18}\text{BrO}^+[\text{M} + \text{H}]^+$ : 377.0536, Found: 377.0523.

**Optical Rotation:**  $[\alpha]_{\text{D}}^{25} = -271.4^\circ$  ( $c = 0.5$ , acetone).

**HPLC analysis:** Chiralcel OD-H (Hexane/*i*-PrOH = 90:10, flow rate = 1.0 mL/min, wave length = 254 nm,  $t_{\text{R}} = 5.037$  min (major),  $t_{\text{R}} = 5.743$  min (minor), 92% ee.

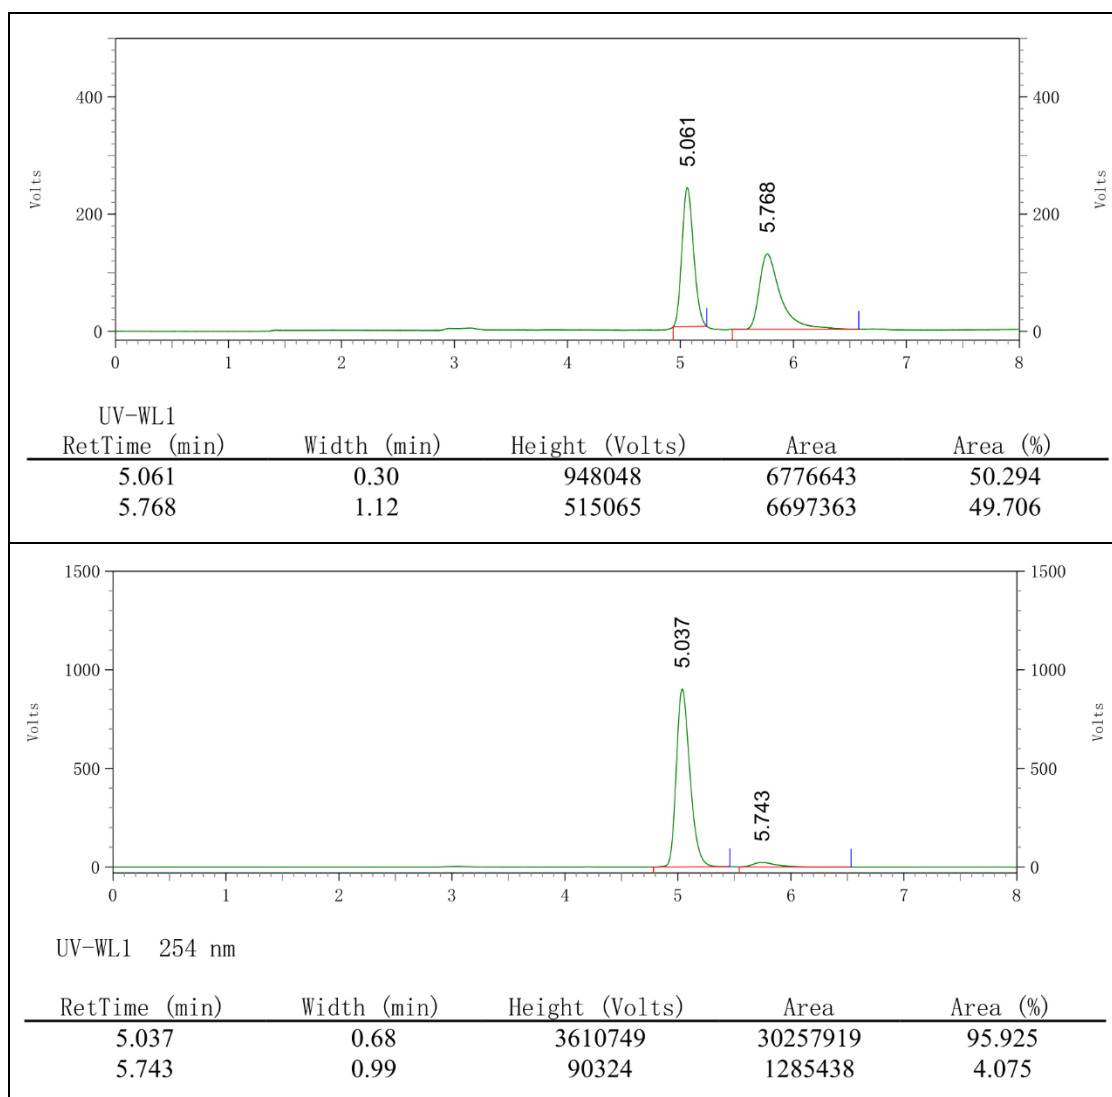

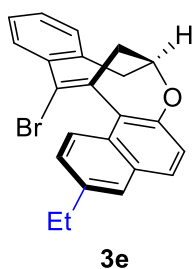

**(S)-14-bromo-3-ethyl-8,9-dihydro-8,15-methanobenzo[f]naphtho[2,1-b]oxonine(3e)**

Compound **3e** was synthesized in 63% yield (148 mg, 0.6 mmol scale) under condition [A]. **3e** was purified by silica gel column chromatography using PE:EA (60:1 to 50:1) as eluent.

White solid. ( $R_f$  = 0.4, PE/EA = 20:1)

$^1\text{H NMR}$  (600 MHz,  $\text{CDCl}_3$ )  $\delta$  7.93 (d,  $J$  = 8.5 Hz, 1H), 7.66 (d,  $J$  = 8.9 Hz, 1H), 7.60 – 7.54 (m, 2H), 7.43 – 7.35 (m, 2H), 7.27 – 7.23 (m, 1H), 7.15 (d,  $J$  = 7.4 Hz, 1H), 7.06 (d,  $J$  = 8.8 Hz, 1H), 5.33 – 5.27 (m, 1H), 3.24 – 3.15 (m, 2H), 2.84 – 2.78 (m, 3H), 2.54 (dd,  $J$  = 12.6, 2.9 Hz, 1H), 1.34 (t,  $J$  = 7.6 Hz, 3H).

$^{13}\text{C NMR}$  (150 MHz,  $\text{CDCl}_3$ )  $\delta$  151.11, 141.50, 139.27, 136.23, 135.46, 130.16, 129.24, 128.93, 128.72, 127.78, 127.06, 127.01, 126.67, 125.64, 121.39, 118.03, 114.84, 83.94, 40.65, 35.34, 28.76, 15.45.

**HRMS (APCI)**  $m/z$  Calcd for  $\text{C}_{23}\text{H}_{20}\text{BrO}^+[\text{M} + \text{H}]^+$ : 391.0692, Found: 391.0678.

**Optical Rotation:**  $[\alpha]_{\text{D}}^{25} = -299.8^\circ$  ( $c$  = 0.5, acetone).

**HPLC analysis:** Chiralcel IA-H (Hexane/*i*-PrOH = 98:2, flow rate = 1.0 mL/min, wave length = 254 nm,  $t_{\text{R}}$  = 5.767 min (major),  $t_{\text{R}}$  = 6.721 min (minor), 95% ee.

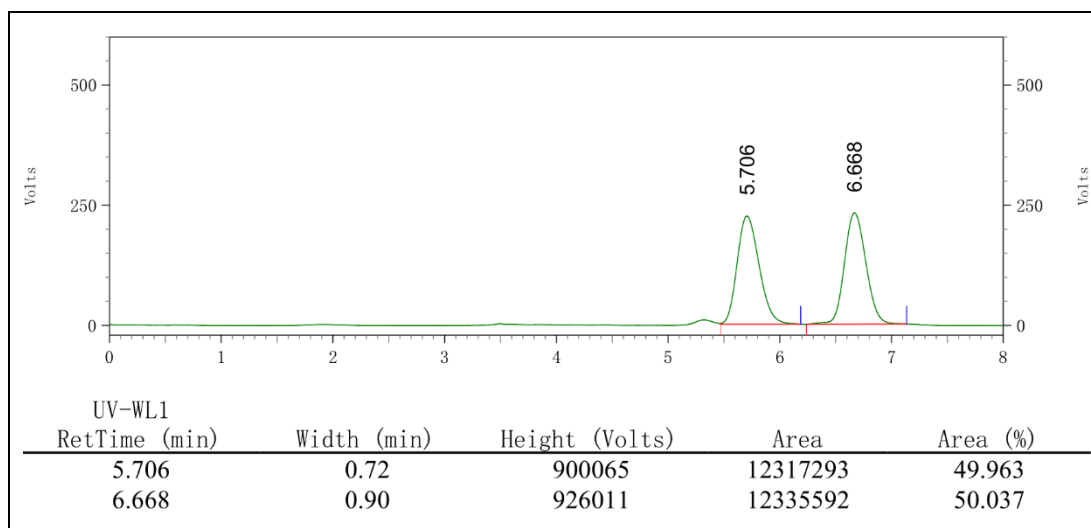

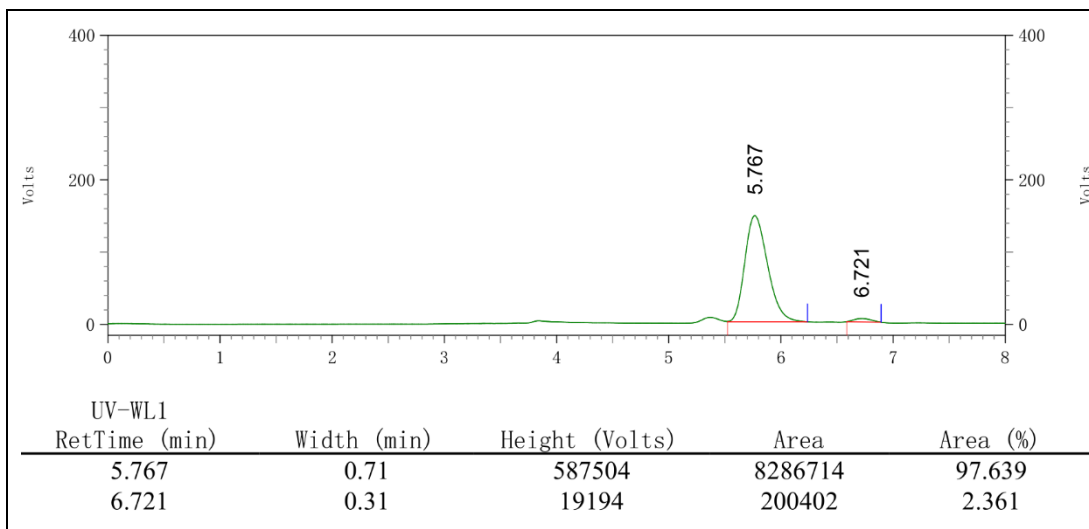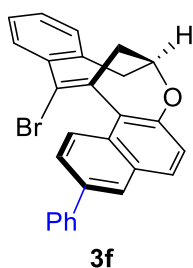

**(S)-14-bromo-3-phenyl-8,9-dihydro-8,15-methanobenzo[f]naphtho[2,1-b]oxonine (3f)**

Compound **3f** was synthesized in 55% yield (145 mg, 0.6 mmol scale) under condition [A]. **3f** was purified by silica gel column chromatography using PE:EA (60:1 to 50:1) as eluent.

White solid. ( $R_f$  = 0.6, PE/EA = 20:1)

$^1\text{H NMR}$  (400 MHz,  $\text{CDCl}_3$ )  $\delta$  8.08 (d,  $J$  = 8.6 Hz, 1H), 7.98 (s, 1H), 7.83 – 7.77 (m, 2H), 7.74 (d,  $J$  = 7.2 Hz, 2H), 7.60 (d,  $J$  = 7.6 Hz, 1H), 7.48 (t,  $J$  = 7.6 Hz, 2H), 7.43 – 7.33 (m, 2H), 7.29 – 7.25 (m, 1H), 7.17 (d,  $J$  = 7.5 Hz, 1H), 7.12 (d,  $J$  = 8.8 Hz, 1H), 5.39 – 5.29 (m, 1H), 3.27 – 3.17 (m, 2H), 2.84 (d,  $J$  = 12.2 Hz, 1H), 2.58 (dd,  $J$  = 12.2, 3.5 Hz, 1H).

$^{13}\text{C NMR}$  (100 MHz,  $\text{CDCl}_3$ )  $\delta$  151.84, 141.43, 141.15, 136.21, 136.16, 135.19, 130.20, 129.74, 129.28, 129.02, 128.80, 128.75, 127.91, 127.85, 127.27, 127.24, 127.23, 127.06, 125.84, 125.47, 121.40, 118.59, 115.19, 84.14, 40.63, 35.32.

**HRMS (APCI)**  $m/z$  Calcd for  $\text{C}_{27}\text{H}_{20}\text{BrO}^+[\text{M} + \text{H}]^+$ : 439.0692, Found: 439.0690.

**Optical Rotation:**  $[\alpha]_{\text{D}}^{25} = -131.4^\circ$  ( $c$  = 0.5, acetone).

**HPLC analysis:** Chiralcel IA-H (Hexane/*i*-PrOH = 95:5, flow rate = 1.0 mL/min, wave length = 254 nm),  $t_{\text{R}}$  = 6.118 min (major),  $t_{\text{R}}$  = 7.532 min (minor), 90% ee.

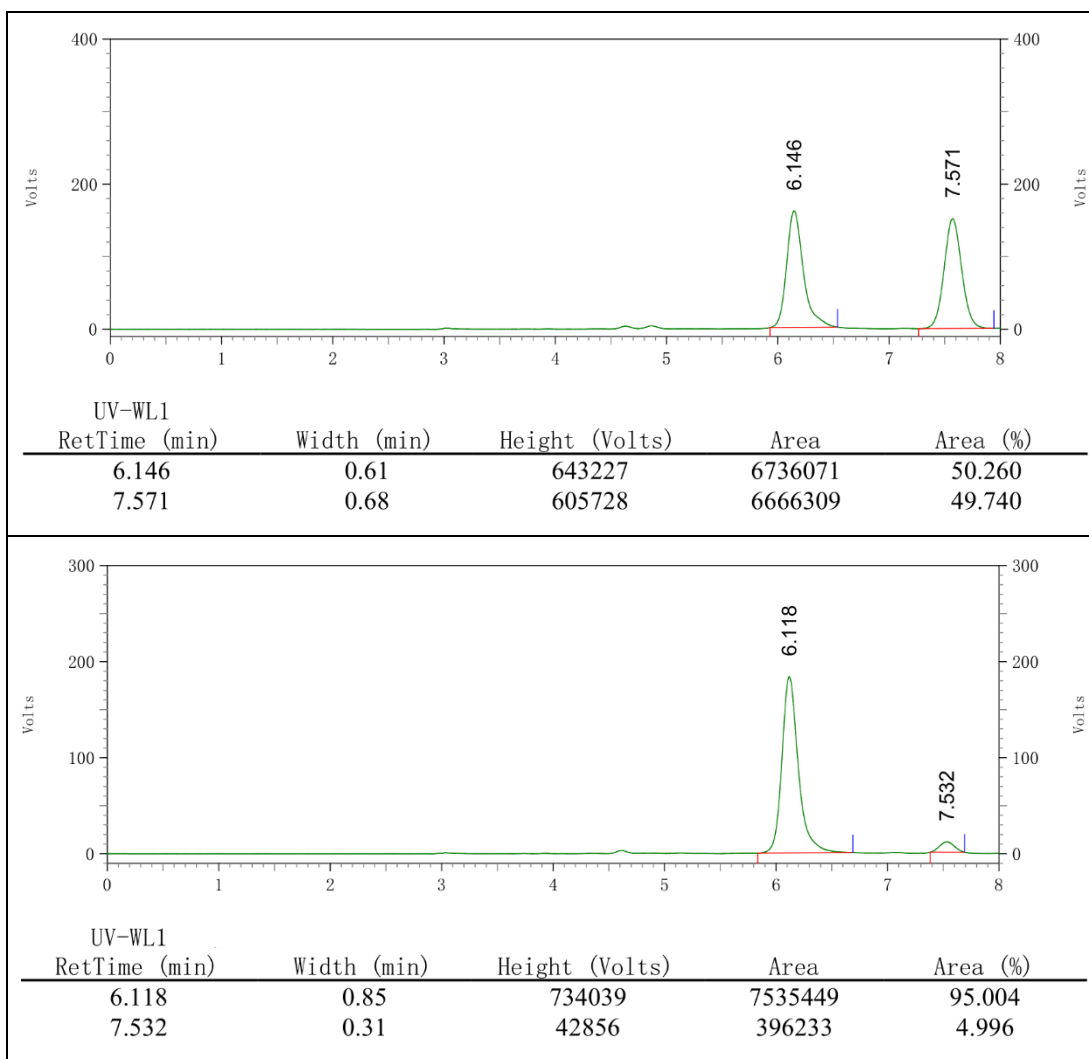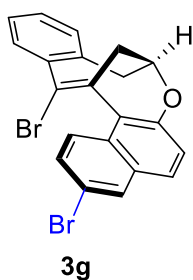

**(S)-3,14-dibromo-8,9-dihydro-8,15-methanobenzo[f]naphtho[2,1-b]oxonine (3g)**

Compound **3g** was synthesized in 59% yield (157 mg, 0.6 mmol scale) under condition [A]. **3g** was purified by silica gel column chromatography using PE:EA (60:1 to 50:1) as eluent.

Yellow solid. ( $R_f$  = 0.4, PE/EA = 20:1)

$^1\text{H NMR}$  (600 MHz,  $\text{CDCl}_3$ )  $\delta$  7.93 (s, 1H), 7.87 (d,  $J$  = 8.9 Hz, 1H), 7.63 (d,  $J$  = 8.9 Hz, 1H), 7.60 – 7.52 (m, 2H), 7.40 (t,  $J$  = 7.6 Hz, 1H), 7.29 – 7.25 (m, 1H), 7.16 (d,  $J$  = 7.5 Hz, 1H), 7.11 (d,  $J$  = 8.9 Hz, 1H), 5.37 – 5.27 (m, 1H), 3.23 (dd,  $J$  = 14.6, 8.3 Hz, 1H), 3.16 (dd,  $J$  = 14.7, 6.3 Hz, 1H), 2.83 (d,  $J$  = 12.2 Hz, 1H), 2.55 (dd,  $J$  = 12.2, 3.2 Hz, 1H).

$^{13}\text{C NMR}$  (100 MHz,  $\text{CDCl}_3$ )  $\delta$  151.98, 141.22, 135.99, 134.66, 130.18, 129.83, 129.58, 129.29, 129.12, 129.04, 128.48, 128.43, 127.89, 127.24, 121.60, 119.26, 117.12, 115.59, 84.23, 40.55, 35.17.

**HRMS (APCI)**  $m/z$  Calcd for Chemical Formula:  $\text{C}_{21}\text{H}_{15}\text{Br}_2\text{O}^+$  [ $\text{M} + \text{H}$ ] $^+$ : 442.9464, Found: 442.9456.

**Optical Rotation:**  $[\alpha]_D^{25} = -320.4^\circ$  ( $c = 0.5$ , acetone).

**HPLC analysis:** Chiralcel AD-H (Hexane/*i*-PrOH = 98:2, flow rate = 1.0 mL/min, wave length = 254 nm),  $t_R = 6.784$  min (major),  $t_R = 8.009$  min (minor), 91% ee.

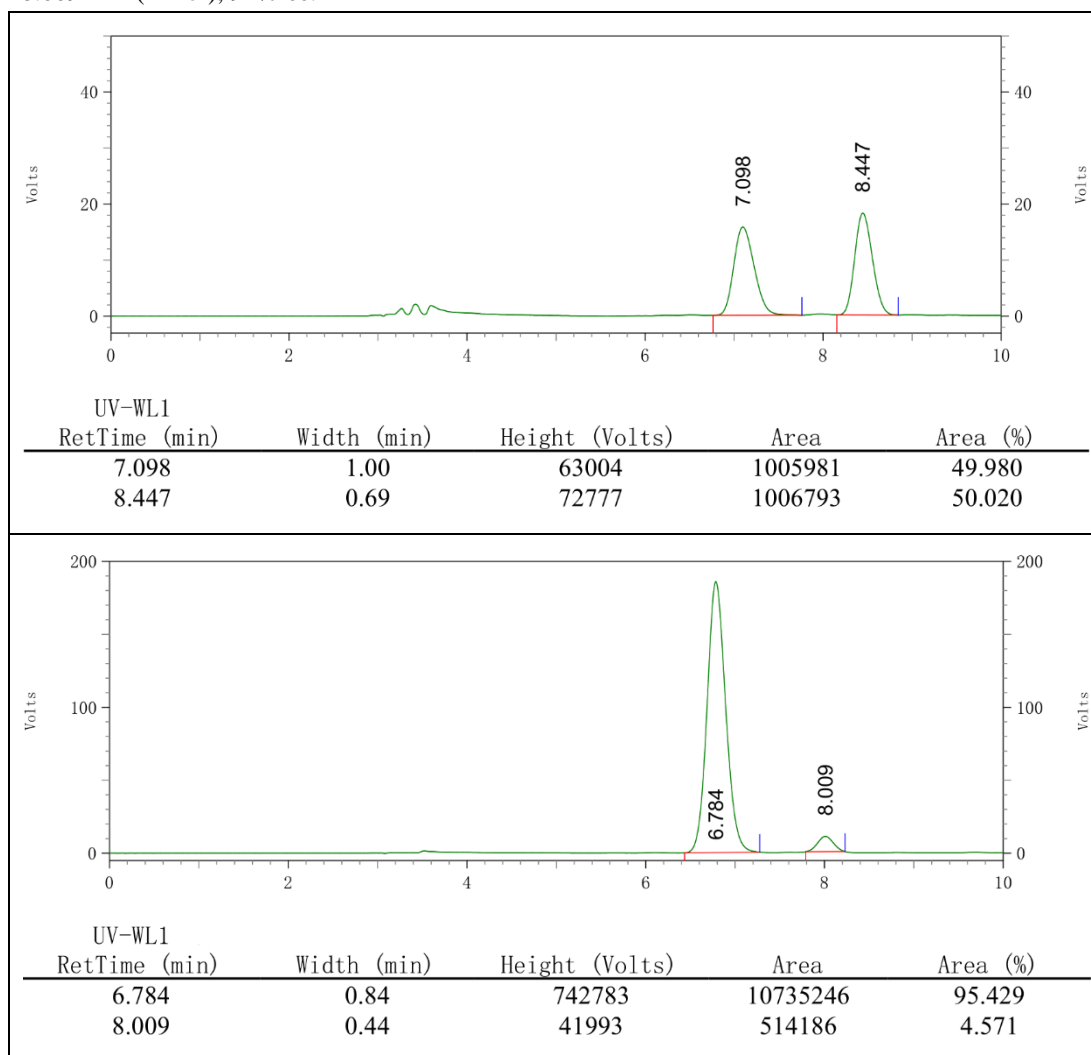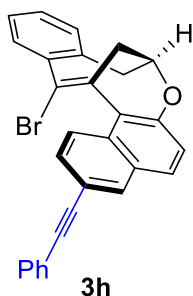

**(S)-14-bromo-3-(phenylethynyl)-8,9-dihydro-8,15-methanobenzo[f]naphtho[2,1-b]oxonine (3h)**

Compound **3h** was synthesized in 61% yield (170 mg, 0.6 mmol scale) under condition [A]. **3h** was purified by silica gel column chromatography using PE : EA (60:1 to 50:1) as eluent.

White solid. ( $R_f = 0.4$ , PE/EA = 20:1)

**<sup>1</sup>H NMR** (600 MHz, CDCl<sub>3</sub>) δ 8.03 – 7.92 (m, 2H), 7.68 (d, *J* = 8.9 Hz, 1H), 7.63 (d, *J* = 8.8 Hz, 1H), 7.61 – 7.52 (m, 3H), 7.42 – 7.30 (m, 4H), 7.25 (t, *J* = 7.9 Hz, 1H), 7.14 (d, *J* = 7.5 Hz, 1H), 7.10 (d, *J* = 8.8 Hz, 1H), 5.36 – 5.27 (m, 1H), 3.24 – 3.13 (m, 2H), 2.81 (d, *J* = 12.3 Hz, 1H), 2.55 (dd, *J* = 12.3, 3.6 Hz, 1H).

**<sup>13</sup>C NMR** (100 MHz, CDCl<sub>3</sub>) δ 152.45, 141.25, 135.98, 134.78, 131.57, 131.50, 130.16, 129.30, 129.26, 129.04, 128.36, 128.33, 128.16, 128.09, 128.03, 127.85, 126.83, 123.45, 121.57, 118.85, 118.00, 115.44, 90.04, 89.16, 84.24, 40.53, 35.16.

**HRMS (APCI)** *m/z* Calcd for C<sub>29</sub>H<sub>20</sub>BrO<sup>+</sup> [M + H]<sup>+</sup>: 463.0692, Found: 463.0683.

**Optical Rotation:** [α]<sub>D</sub><sup>25</sup> = -431.0° (*c* = 0.5, acetone).

**HPLC analysis:** Chiralcel AD-H (Hexane/*i*-PrOH = 98:2, flow rate = 1.0 mL/min, wave length = 254 nm), *t*<sub>R</sub> = 9.516 min (major), *t*<sub>R</sub> = 10.381 min (minor), 93% ee.

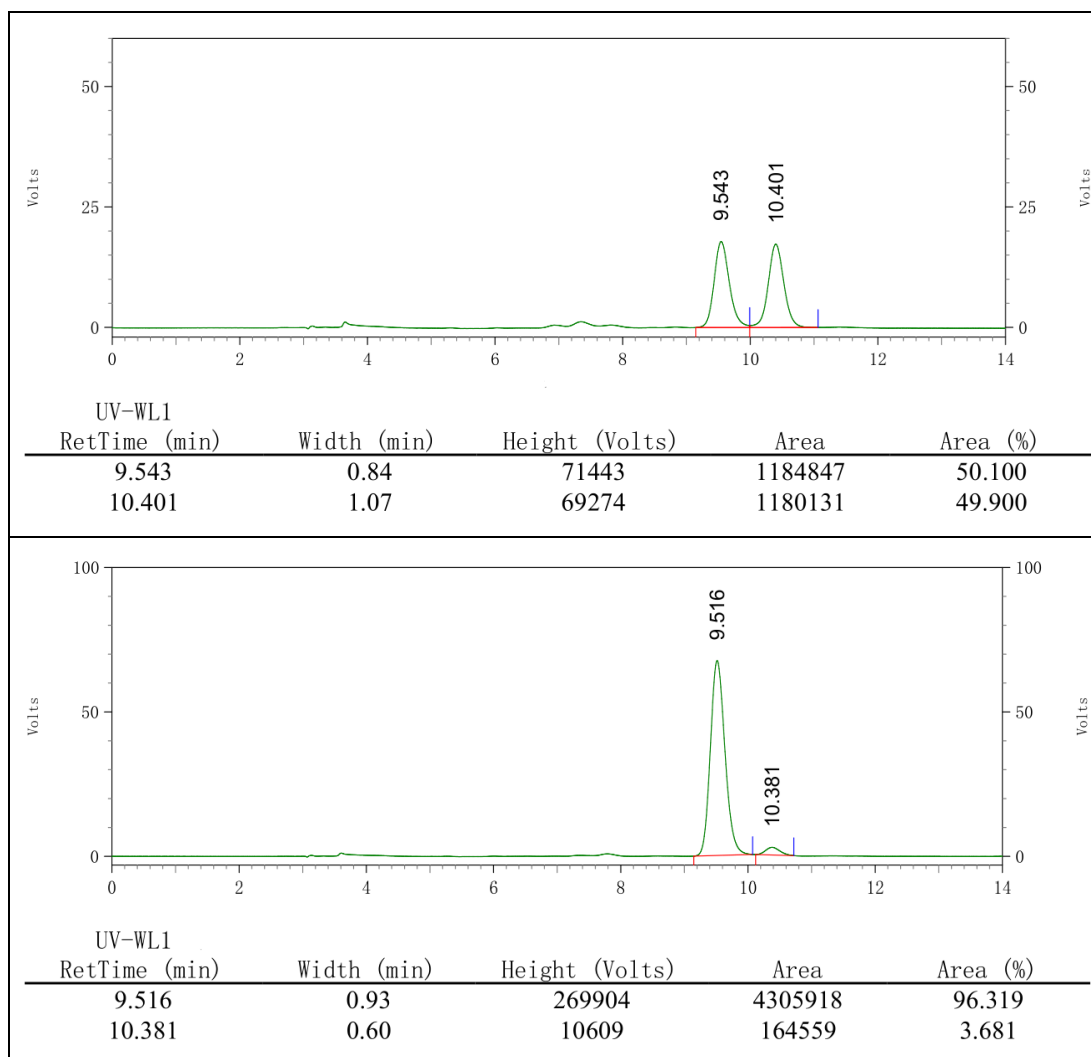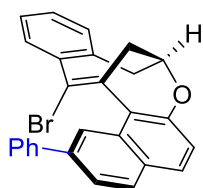

**3i**

**(S)-14-bromo-2-phenyl-8,9-dihydro-8,15-methanobenzo[f]naphtho[2,1-b]oxonine (3i)**

Compound **3i** was synthesized in 57% yield (150 mg, 0.6 mmol scale) under condition [A]. **3i** was purified by silica gel column chromatography using PE:EA (60:1 to 50:1) as eluent.

White solid. ( $R_f = 0.5$ , PE/DCM = 1:1)

**$^1\text{H NMR}$**  (600 MHz,  $\text{CDCl}_3$ )  $\delta$  8.21 (s, 1H), 7.88 – 7.80 (m, 3H), 7.74 (d,  $J = 8.9$  Hz, 1H), 7.63 (t,  $J = 8.4$  Hz, 2H), 7.51 (t,  $J = 7.5$  Hz, 2H), 7.40 (t,  $J = 6.4$  Hz, 2H), 7.25 (d,  $J = 7.7$  Hz, 1H), 7.17 (d,  $J = 7.5$  Hz, 1H), 7.09 (d,  $J = 8.8$  Hz, 1H), 5.35 – 5.30 (m, 1H), 3.24 – 3.20 (m, 2H), 2.84 (d,  $J = 12.2$  Hz, 1H), 2.58 (dd,  $J = 12.2, 3.6$  Hz, 1H).

**$^{13}\text{C NMR}$**  (150 MHz,  $\text{CDCl}_3$ )  $\delta$  152.07, 141.46, 141.44, 138.54, 136.17, 135.24, 130.29, 129.26, 129.15, 129.01, 128.90, 128.78, 128.43, 127.83, 127.67, 127.58, 127.29, 124.90, 123.25, 121.69, 118.19, 115.23, 84.12, 40.63, 35.35.

**HRMS (APCI)**  $m/z$  Calcd for  $\text{C}_{27}\text{H}_{20}\text{BrO}^+[\text{M} + \text{H}]^+$ : 439.0692, Found: 439.0683.

**Optical Rotation:**  $[\alpha]_{\text{D}}^{25} = -276.2^\circ$  ( $c = 0.5$ , acetone).

**HPLC analysis:** Chiralcel AD-H (Hexane/*i*-PrOH = 98:2, flow rate = 1.0 mL/min, wave length = 254 nm),  $t_{\text{R}} = 7.133$  min (major),  $t_{\text{R}} = 8.056$  min (minor), 90% ee.

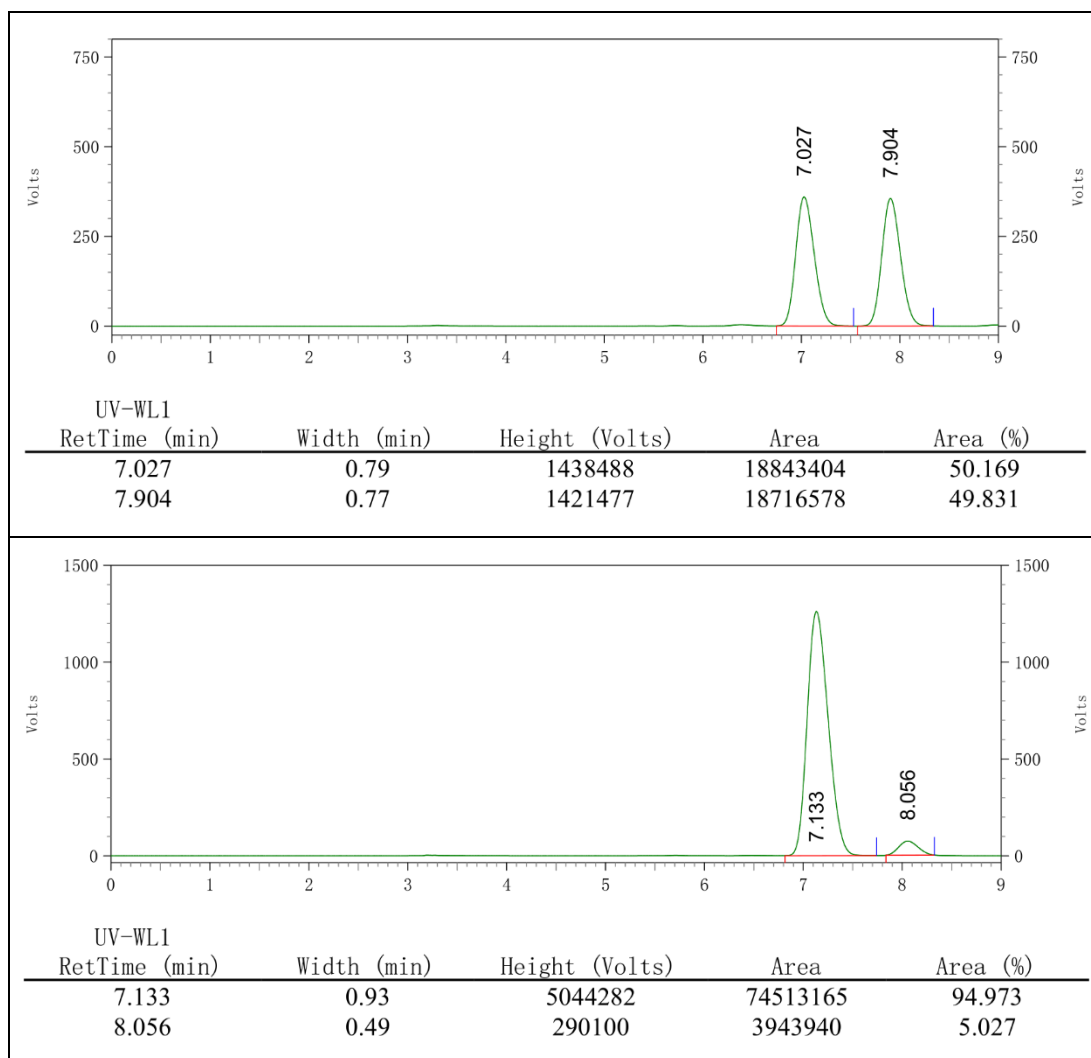



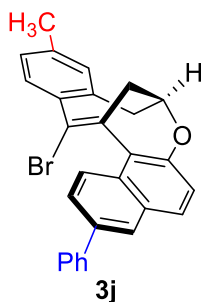

**(S)-14-bromo-11-methyl-3-phenyl-8,9-dihydro-8,15-methanobenzo[f]naphtho[2,1-b]oxonine (3j)**

Compound **3j** was synthesized in 64% yield (174 mg, 0.6 mmol scale) under condition [A]. **3j** was purified by silica gel column chromatography using PE:EA (60:1 to 50:1) as eluent.

Yellow solid. ( $R_f = 0.6$ , PE/EA = 15:1)

**$^1\text{H NMR}$**  (600 MHz,  $\text{CDCl}_3$ )  $\delta$  8.07 (d,  $J = 8.6$  Hz, 1H), 7.97 (s, 1H), 7.80 – 7.76 (m, 2H), 7.73 (d,  $J = 7.6$  Hz, 2H), 7.50 – 7.44 (m, 3H), 7.36 (t,  $J = 7.4$  Hz, 1H), 7.20 (d,  $J = 7.7$  Hz, 1H), 7.11 (d,  $J = 8.8$  Hz, 1H), 6.98 (s, 1H), 5.33 – 5.29 (m, 1H), 3.18 – 3.16 (m, 2H), 2.83 (d,  $J = 12.1$  Hz, 1H), 2.55 (dd,  $J = 12.1, 3.2$  Hz, 1H), 2.36 (s, 3H).

**$^{13}\text{C NMR}$**  (150 MHz,  $\text{CDCl}_3$ )  $\delta$  151.76, 141.15, 139.07, 138.52, 136.14, 135.95, 134.69, 130.09, 130.02, 129.64, 128.77, 128.72, 128.38, 127.95, 127.32, 127.29, 127.21, 127.03, 125.80, 125.39, 121.46, 118.56, 115.46, 84.11, 40.61, 35.34, 21.39.

**HRMS (APCI)**  $m/z$  Calcd for  $\text{C}_{28}\text{H}_{22}\text{BrO}^+[\text{M} + \text{H}]^+$ : 453.0849, Found: 453.0837.

**Optical Rotation:**  $[\alpha]_{\text{D}}^{25} = -298.8^\circ$  ( $c = 0.5$ , acetone).

**HPLC analysis:** Chiralcel AD-H (Hexane/*i*-PrOH = 95:5, flow rate = 1.0 mL/min, wave length = 254 nm),  $t_{\text{R}} = 6.209$  min (major),  $t_{\text{R}} = 7.791$  min (minor), 94% ee.

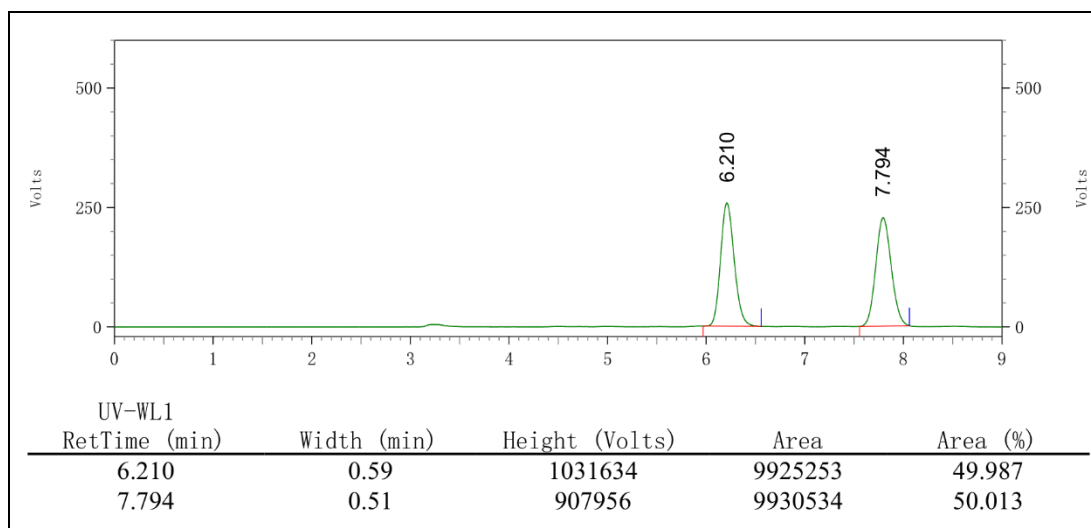

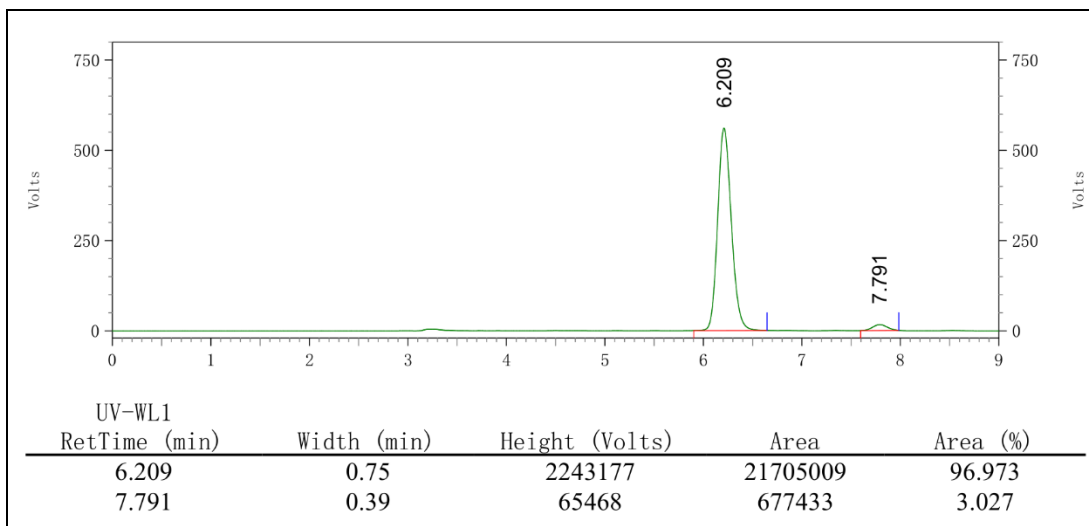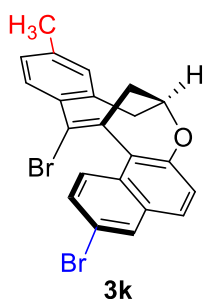

**(S)-3,14-dibromo-11-methyl-8,9-dihydro-8,15-methanobenzo[f]naphtho[2,1-b]oxonine (3k)**

Compound **3k** was synthesized in 52% yield (142 mg, 0.6 mmol scale) under condition [A]. **3k** was purified by silica gel column chromatography using PE:EA (60:1 to 50:1) as eluent.

White solid. ( $R_f$  = 0.5, PE/EA = 20:1)

**$^1\text{H NMR}$**  (600 MHz,  $\text{CDCl}_3$ )  $\delta$  7.91 (s, 1H), 7.87 (d,  $J$  = 8.9 Hz, 1H), 7.61 (d,  $J$  = 8.9 Hz, 1H), 7.57 (d,  $J$  = 8.8 Hz, 1H), 7.45 (d,  $J$  = 7.7 Hz, 1H), 7.19 (d,  $J$  = 7.6 Hz, 1H), 7.09 (d,  $J$  = 8.9 Hz, 1H), 6.98 (s, 1H), 5.34 – 5.27 (m, 1H), 3.20 – 3.08 (m, 2H), 2.82 (d,  $J$  = 12.3 Hz, 1H), 2.52 (d,  $J$  = 12.1 Hz, 1H), 2.36 (s, 3H).

**$^{13}\text{C NMR}$**  (150 MHz,  $\text{CDCl}_3$ )  $\delta$  151.92, 139.23, 138.33, 135.81, 134.18, 130.12, 130.11, 130.02, 129.80, 129.57, 128.97, 128.55, 128.45, 128.34, 127.29, 121.69, 119.24, 117.09, 115.88, 84.21, 40.53, 35.20, 21.39.

**HRMS (APCI)**  $m/z$  Calcd for  $\text{C}_{22}\text{H}_{17}\text{Br}_2\text{O}^+[\text{M} + \text{H}]^+$ : 456.9620, Found: 456.9612.

**Optical Rotation:**  $[\alpha]_{\text{D}}^{25} = -221^\circ$  ( $c$  = 0.5, acetone).

**HPLC analysis:** Chiralcel AD-H (Hexane/*i*-PrOH = 98:2, flow rate = 1.0 mL/min, wave length = 254 nm),  $t_{\text{R}} = 6.083$  min (major),  $t_{\text{R}} = 6.910$  min (minor), 93% ee.

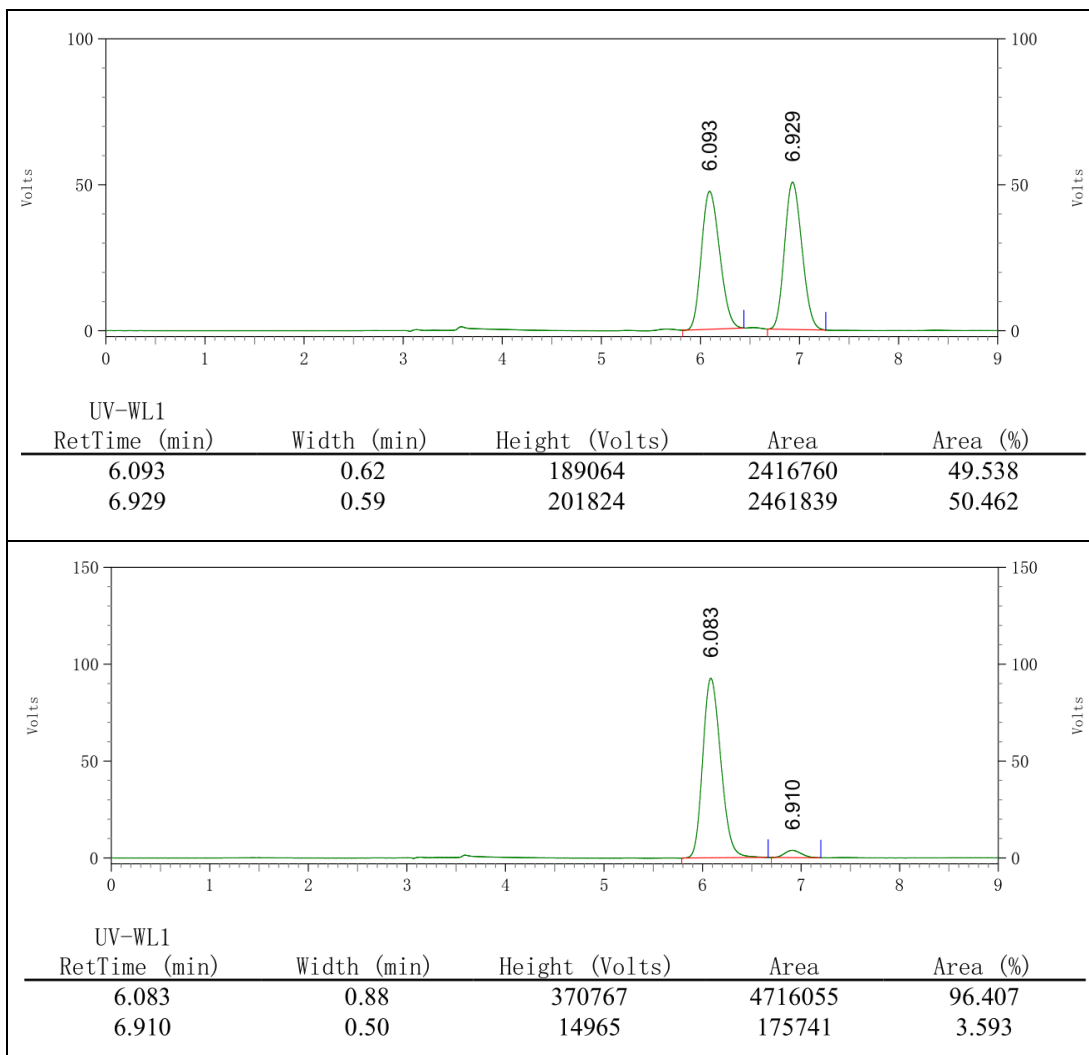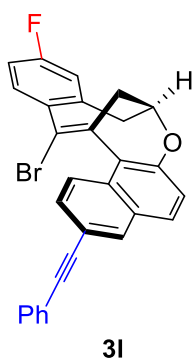

**(S)-14-bromo-11-fluoro-3-(phenylethynyl)-8,9-dihydro-8,15-methanobenzo[f]naphtho[2,1-b]oxonine (3I)**

Compound **3I** was synthesized in 66% yield (191 mg, 0.6 mmol scale) under condition [A]. **3I** was purified by silica gel column chromatography using PE:EA (60:1 to 50:1) as eluent.

Yellow solid. ( $R_f$  = 0.6, PE/EA = 20:1)

$^1\text{H NMR}$  (600 MHz,  $\text{CDCl}_3$ )  $\delta$  7.99 (s, 1H), 7.94 (d,  $J$  = 8.6 Hz, 1H), 7.70 (d,  $J$  = 9.0 Hz, 1H), 7.63 (d,  $J$  = 8.7 Hz, 1H), 7.61 – 7.52 (m, 3H), 7.44 – 7.28 (m, 3H), 7.15 – 7.04 (m, 2H), 6.90 (dd,  $J$  = 9.1, 2.6 Hz, 1H), 5.36 – 5.29 (m, 1H), 3.23 – 3.12 (m, 2H), 2.80 (d,  $J$  = 12.3 Hz, 1H), 2.58 (dd,  $J$  = 12.3, 3.6 Hz, 1H).

$^{13}\text{C}$  NMR (150 MHz,  $\text{CDCl}_3$ )  $\delta$  162.26 (d,  $J = 250.2$  Hz), 152.30, 138.64 (d,  $J = 7.9$  Hz), 137.28 (d,  $J = 3.2$  Hz), 135.10, 132.02 (d,  $J = 8.7$  Hz), 131.59, 131.52, 129.44, 128.45, 128.35, 128.13, 126.78, 123.47, 121.46, 118.82, 118.15, 116.45 (d,  $J = 21.9$  Hz), 114.65 (d,  $J = 21.8$  Hz), 114.55, 89.97, 89.23, 83.79, 40.62, 35.20.

HRMS (APCI)  $m/z$  Calcd for  $\text{C}_{29}\text{H}_{19}\text{BrFO}^+[\text{M} + \text{H}]^+$ : 481.0598, Found: 481.0587.

Optical Rotation:  $[\alpha]_{\text{D}}^{25} = -223.8^\circ$  ( $c = 0.5$ , acetone).

HPLC analysis: Chiralcel OD-H (Hexane/*i*-PrOH = 98:2, flow rate = 1.0 mL/min, wave length = 254 nm),  $t_{\text{R}} = 15.877$  min (major),  $t_{\text{R}} = 18.989$  min (minor), 94% ee.

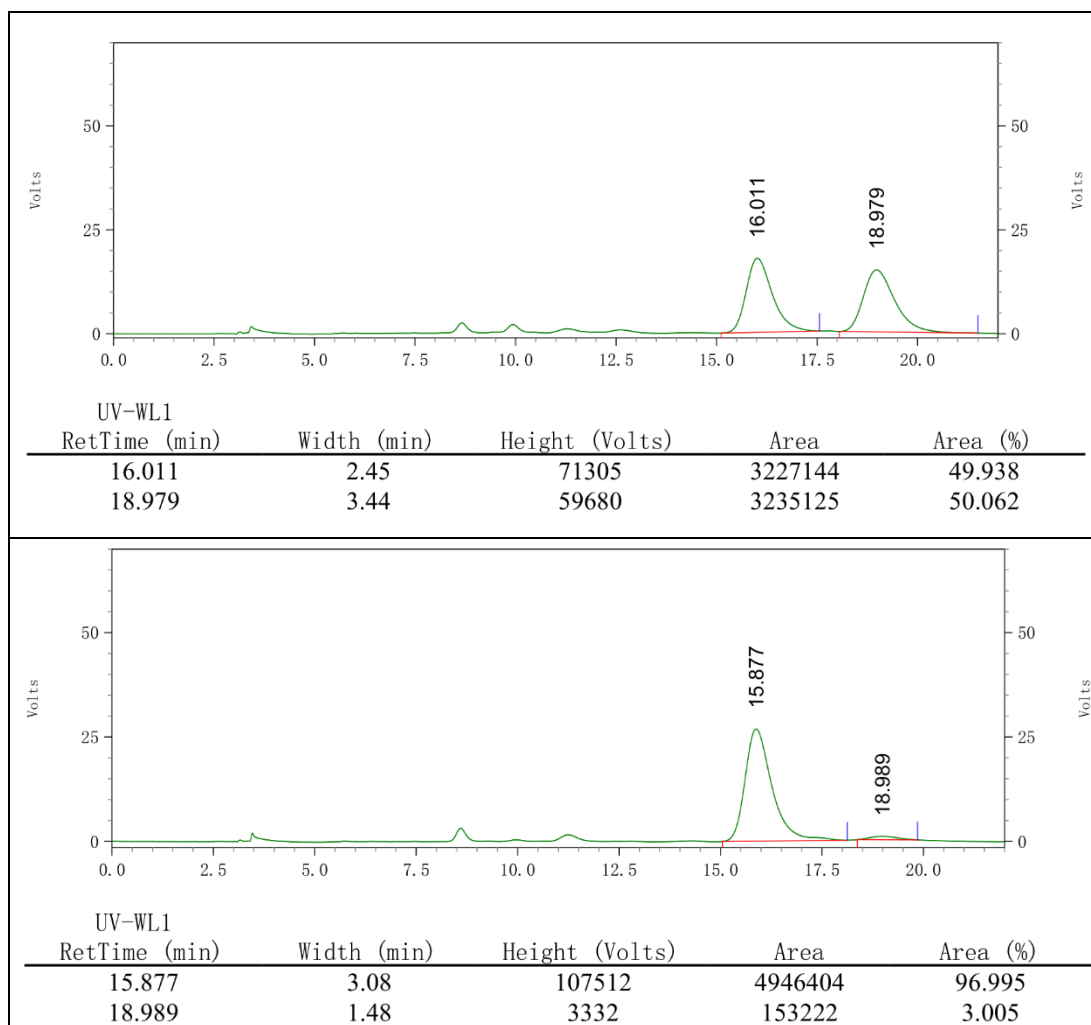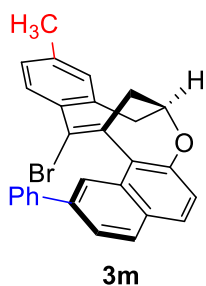

(*S*)-14-bromo-11-methyl-2-phenyl-8,9-dihydro-8,15-methanobenzo[*f*]naphtho[2,1-*b*]oxonine (**3m**)

Compound **3m** was synthesized in 65% yield (177 mg, 0.6 mmol scale) under condition [A]. **3m** was purified by silica gel column chromatography using PE:EA (60:1 to 50:1) as eluent.

Yellow solid. ( $R_f = 0.5$ , PE/EA = 20:1)

**$^1\text{H}$  NMR** (600 MHz,  $\text{CDCl}_3$ )  $\delta$  8.21 (d,  $J = 1.7$  Hz, 1H), 7.85 – 7.82 (m, 3H), 7.73 (d,  $J = 8.8$  Hz, 1H), 7.62 (dd,  $J = 8.4$ , 1.8 Hz, 1H), 7.53 – 7.49 (m, 3H), 7.41 – 7.37 (m, 1H), 7.21 (dd,  $J = 7.8$ , 1.7 Hz, 1H), 7.08 (d,  $J = 8.8$  Hz, 1H), 6.99 (d,  $J = 1.7$  Hz, 1H), 5.33 – 5.30 (m, 1H), 3.18 (d,  $J = 7.3$  Hz, 2H), 2.84 (dd,  $J = 12.2$ , 1.7 Hz, 1H), 2.57 – 2.55 (m, 1H), 2.37 (s, 3H).

**$^{13}\text{C}$  NMR** (150 MHz,  $\text{CDCl}_3$ )  $\delta$  152.00, 141.46, 139.09, 138.55, 138.45, 135.98, 134.74, 130.11, 130.09, 129.06, 128.94, 128.77, 128.39, 127.66, 127.57, 127.27, 124.97, 123.20, 121.76, 118.16, 115.51, 84.10, 40.61, 35.38, 21.39.

**HRMS (APCI)**  $m/z$  Calcd for  $\text{C}_{28}\text{H}_{22}\text{BrO}^+ [\text{M} + \text{H}]^+$ : 453.0849, Found: 453.0839.

**Optical Rotation:**  $[\alpha]_{\text{D}}^{25} = -457.4^\circ$  ( $c = 0.5$ , acetone).

**HPLC analysis:** Chiralcel AD-H (Hexane/*i*-PrOH = 98:2, flow rate = 1.0 mL/min, wave length = 254 nm),  $t_{\text{R}} = 6.358$  min (major),  $t_{\text{R}} = 7.395$  min (minor), 93% ee.

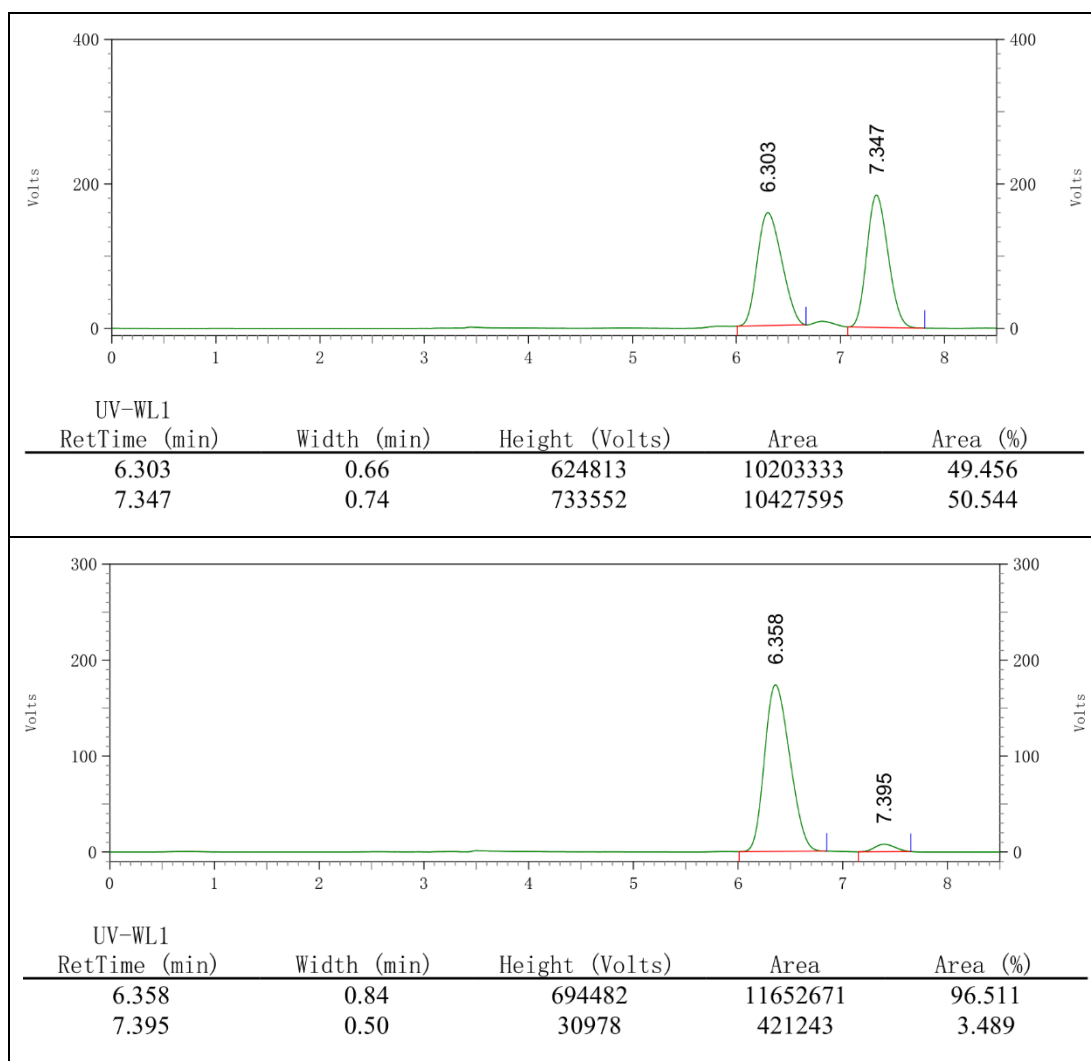

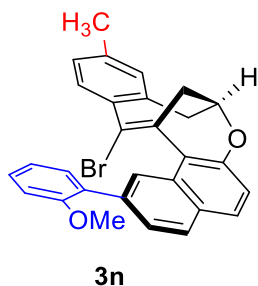

**(S)-14-bromo-2-(2-methoxyphenyl)-11-methyl-8,9-dihydro-8,15-methanobenzo[f]naphtho[2,1-b]oxonine (3n)**

Compound **3n** synthesized in 62% yield (180 mg, 0.6 mmol scale) under condition [A]. **3n** was purified by silica gel column chromatography using PE:EA (60:1 to 50:1) as eluent.

Yellow solid. ( $R_f = 0.5$ , PE/EA = 20:1)

$^1\text{H NMR}$  (600 MHz,  $\text{CDCl}_3$ )  $\delta$  8.08 (s, 1H), 7.78 (d,  $J = 8.4$  Hz, 1H), 7.72 (d,  $J = 8.8$  Hz, 1H), 7.58 (d,  $J = 7.9$  Hz, 2H), 7.46 (d,  $J = 7.7$  Hz, 1H), 7.37 (t,  $J = 7.9$  Hz, 1H), 7.18 (d,  $J = 7.8$  Hz, 1H), 7.11 (t,  $J = 7.4$  Hz, 1H), 7.07 (d,  $J = 8.8$  Hz, 1H), 7.03 (d,  $J = 8.3$  Hz, 1H), 6.98 (s, 1H), 5.33 – 5.27 (m, 1H), 3.85 (s, 3H), 3.17 (d,  $J = 7.2$  Hz, 2H), 2.80 (d,  $J = 12.1$  Hz, 1H), 2.52 (dd,  $J = 12.2, 3.5$  Hz, 1H), 2.36 (s, 3H).

$^{13}\text{C NMR}$  (150 MHz,  $\text{CDCl}_3$ )  $\delta$  156.76, 151.68, 138.99, 138.59, 136.41, 136.00, 134.88, 131.47, 131.11, 130.06, 130.02, 129.02, 128.84, 128.67, 128.33, 127.48, 127.08, 126.93, 125.81, 121.77, 120.89, 117.96, 115.31, 111.24, 84.03, 55.59, 40.66, 35.32, 21.38.

**HRMS (APCI)**  $m/z$  Calcd for  $\text{C}_{29}\text{H}_{24}\text{BrO}_2^+[\text{M} + \text{H}]^+$ : 483.0954, Found: 483.0941.

**Optical Rotation:**  $[\alpha]_{\text{D}}^{25} = -343.8^\circ$  ( $c = 0.5$ , acetone).

**HPLC analysis:** Chiralcel AD-H (Hexane/*i*-PrOH = 98:2, flow rate = 1.0 mL/min, wave length = 254 nm),  $t_{\text{R}} = 7.791$  min (major),  $t_{\text{R}} = 11.510$  min (minor), 97% ee.

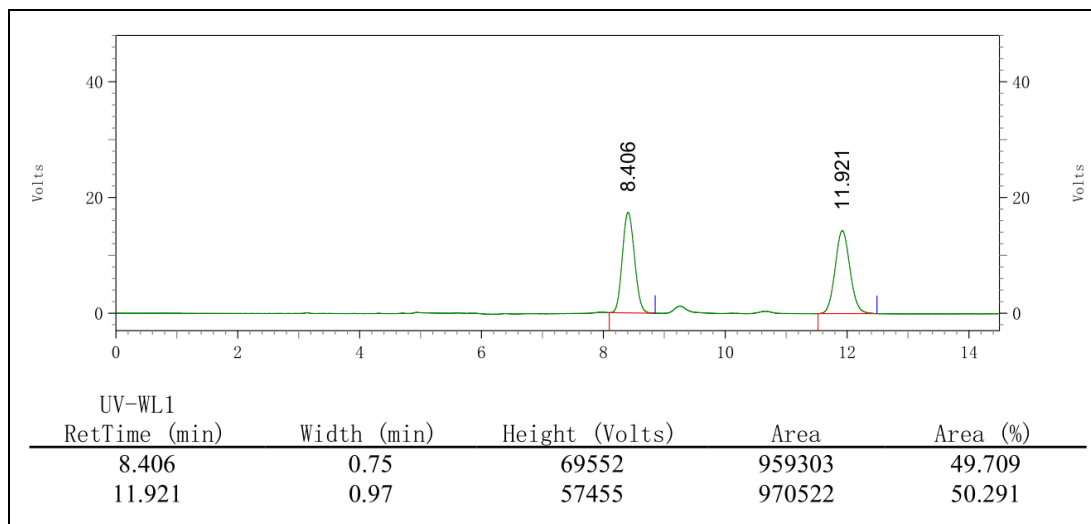

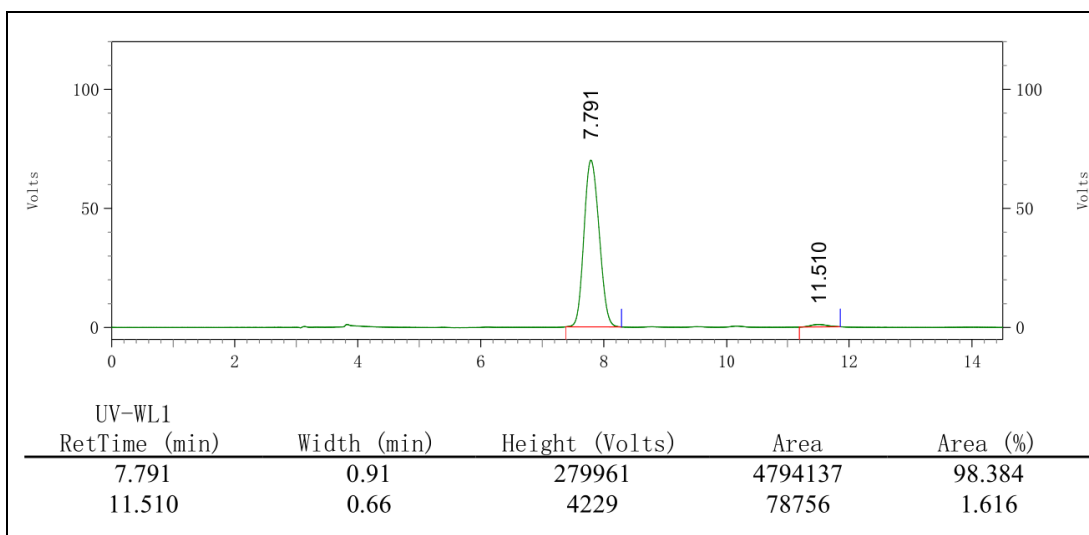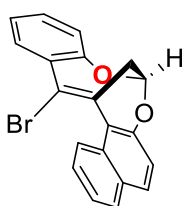

**3o (3a-3)**

**(S)-14-bromo-8,15-methanobenzo[d]naphtho[1,2-h][1,3]dioxonine (3o (3a-3))**

Compound **3o (3a-3)** was synthesized in 85% yield (186 mg, 0.6 mmol scale) under condition [A]. **3o (3a-3)** was purified by silica gel column chromatography using PE:EA (60:1 to 50:1) as eluent.

White solid. ( $R_f = 0.5$ , PE/EA = 20:1)

$^1\text{H NMR}$  (600 MHz,  $\text{CDCl}_3$ )  $\delta$  8.03 (d,  $J = 8.3$  Hz, 1H), 7.82 (d,  $J = 8.2$  Hz, 1H), 7.78 (d,  $J = 8.8$  Hz, 1H), 7.62 (d,  $J = 7.7$  Hz, 1H), 7.55 (t,  $J = 7.6$  Hz, 1H), 7.41 (t,  $J = 7.5$  Hz, 1H), 7.34 (t,  $J = 7.7$  Hz, 1H), 7.26 – 7.22 (m, 2H), 7.12 (d,  $J = 8.0$  Hz, 1H), 6.62 (s, 1H), 3.08 (d,  $J = 13.3$  Hz, 1H), 2.53 (d,  $J = 13.3$  Hz, 1H).

$^{13}\text{C NMR}$  (150 MHz,  $\text{CDCl}_3$ )  $\delta$  151.42, 148.35, 133.63, 131.82, 131.35, 130.75, 129.36, 129.17, 128.42, 128.04, 126.65, 126.05, 124.58, 124.14, 123.77, 122.00, 117.40, 115.75, 110.81, 34.94.

**HRMS (APCI)**  $m/z$  Calcd for  $\text{C}_{20}\text{H}_{14}\text{BrO}_2^+[\text{M} + \text{H}]^+$ : 365.0172, Found: 365.0160.

**Optical Rotation:**  $[\alpha]_D^{25} = -388^\circ$  ( $c = 0.5$ , acetone).

**HPLC analysis:** Chiralcel IA-H (Hexane/*i*-PrOH = 95:5, flow rate = 1.0 mL/min, wave length = 254 nm),  $t_R = 5.530$  min (major),  $t_R = 6.333$  min (minor), 96% ee.

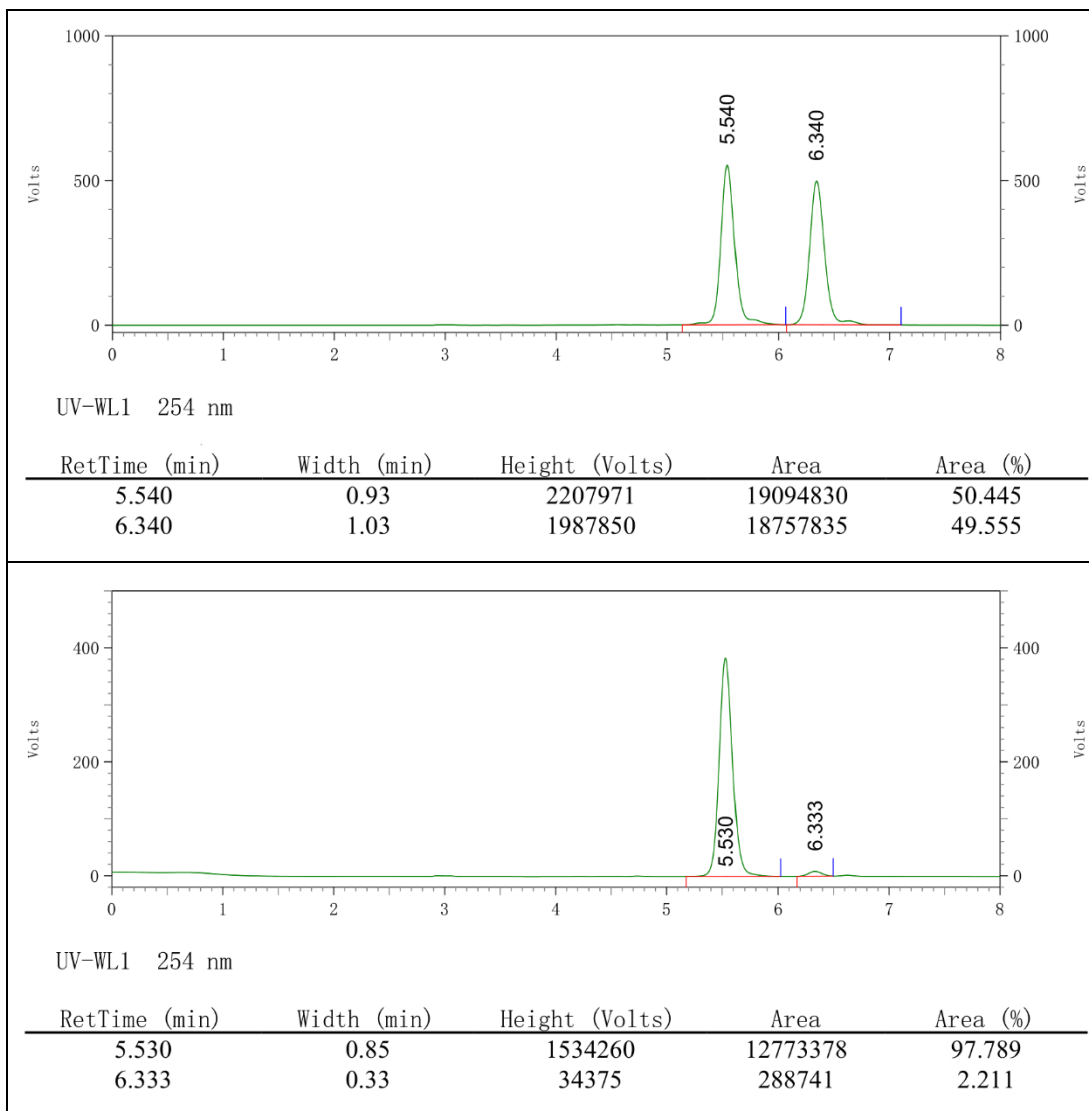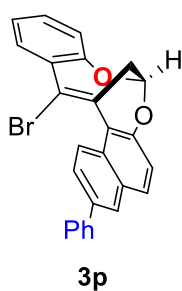

**(S)-14-bromo-3-phenyl-8,15-methanobenzo[d]naphtho[1,2-h][1,3]dioxinine (3p)**

Compound **3p** was synthesized in 85% yield (225 mg, 0.6 mmol scale) under condition [A]. **3p** was purified by silica gel column chromatography using PE:EA (60:1 to 50:1) as eluent.

Pale yellow solid. ( $R_f = 0.4$ , PE/DCM = 1:1)

$^1\text{H NMR}$  (400 MHz,  $\text{CDCl}_3$ )  $\delta$  8.09 (d,  $J = 8.6$  Hz, 1H), 8.01 (s, 1H), 7.83 (d,  $J = 8.6$  Hz, 2H), 7.73 (d,  $J = 8.0$  Hz, 2H), 7.63 (d,  $J = 7.6$  Hz, 1H), 7.48 (t,  $J = 7.5$  Hz, 2H), 7.41 – 7.30 (m, 2H), 7.29 – 7.24 (m, 2H), 7.12 (d,  $J = 8.1$  Hz, 1H), 6.62 (s, 1H), 3.08 (d,  $J = 13.2$  Hz, 1H), 2.53 (d,  $J = 13.2$  Hz, 1H).



$^{13}\text{C}$  NMR (100 MHz,  $\text{CDCl}_3$ )  $\delta$  151.41, 148.45, 140.99, 136.89, 133.59, 131.75, 131.35, 130.78, 129.65, 129.42, 128.82, 127.59, 127.27, 127.21, 127.17, 125.91, 125.80, 124.60, 123.68, 122.01, 117.83, 115.86, 110.85, 34.93.

HRMS (APCI)  $m/z$  Calcd for  $\text{C}_{26}\text{H}_{18}\text{BrO}_2^+[\text{M} + \text{H}]^+$ : 441.0485, Found: 441.0478.

Optical Rotation:  $[\alpha]_{\text{D}}^{25} = -265.4^\circ$  ( $c = 0.5$ , acetone).

HPLC analysis: Chiralcel AS-H (Hexane/*i*-PrOH = 94:6, flow rate = 1.0 mL/min, wave length = 254 nm),  $t_{\text{R}} = 10.868$  min (major),  $t_{\text{R}} = 14.490$  min (minor), 93% ee.

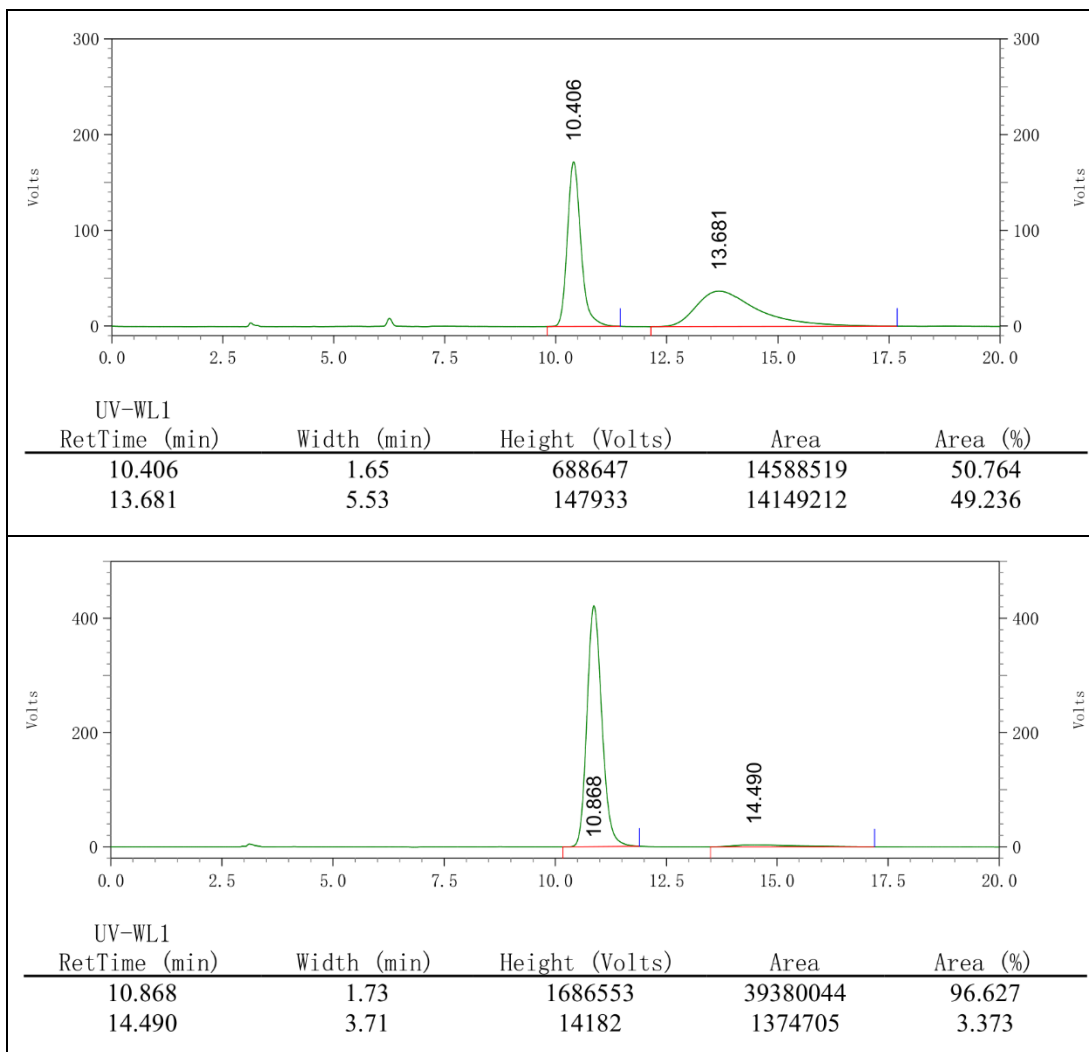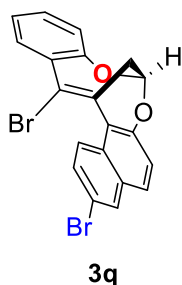

**(S)-3,14-dibromo-8,15-methanobenzo[d]naphtho[1,2-h][1,3]dioxine (3q)**

Compound **3q** was synthesized in 79% yield (211 mg, 0.6 mmol scale) under condition [A]. **3q** was purified by silica gel column chromatography using PE:EA (60:1 to 50:1) as eluent.

Gray solid. ( $R_f = 0.6$ , PE/EA = 20:1)

$^1\text{H NMR}$  (400 MHz,  $\text{CDCl}_3$ )  $\delta$  7.97 (s, 1H), 7.89 (d,  $J = 8.9$  Hz, 1H), 7.68 (d,  $J = 8.9$  Hz, 1H), 7.61 (d,  $J = 7.9$  Hz, 2H), 7.34 (t,  $J = 7.2$  Hz, 1H), 7.28 – 7.21 (m, 2H), 7.12 (d,  $J = 8.0$  Hz, 1H), 6.61 (s, 1H), 3.07 (d,  $J = 13.2$  Hz, 1H), 2.51 (d,  $J = 13.2$  Hz, 1H).

$^{13}\text{C NMR}$  (100 MHz,  $\text{CDCl}_3$ )  $\delta$  151.31, 148.61, 133.42, 131.35, 131.19, 130.91, 130.21, 129.96, 129.38, 128.38, 126.95, 124.69, 123.89, 122.02, 118.51, 117.90, 116.28, 110.83, 34.79.

**HRMS (APCI)**  $m/z$  Calcd for  $\text{C}_{20}\text{H}_{13}\text{Br}_2\text{O}_2^+[\text{M} + \text{H}]^+$ : 444.9256, Found: 444.9247

**Optical Rotation:**  $[\alpha]_{\text{D}}^{25} = -345.4^\circ$  ( $c = 0.5$ , acetone).

**HPLC analysis:** Chiralcel AD-H (Hexane/*i*-PrOH = 98:2, flow rate = 1.0 mL/min, wave length = 254 nm),  $t_{\text{R}} = 8.791$  min (major),  $t_{\text{R}} = 13.349$  min (minor), 96% ee.

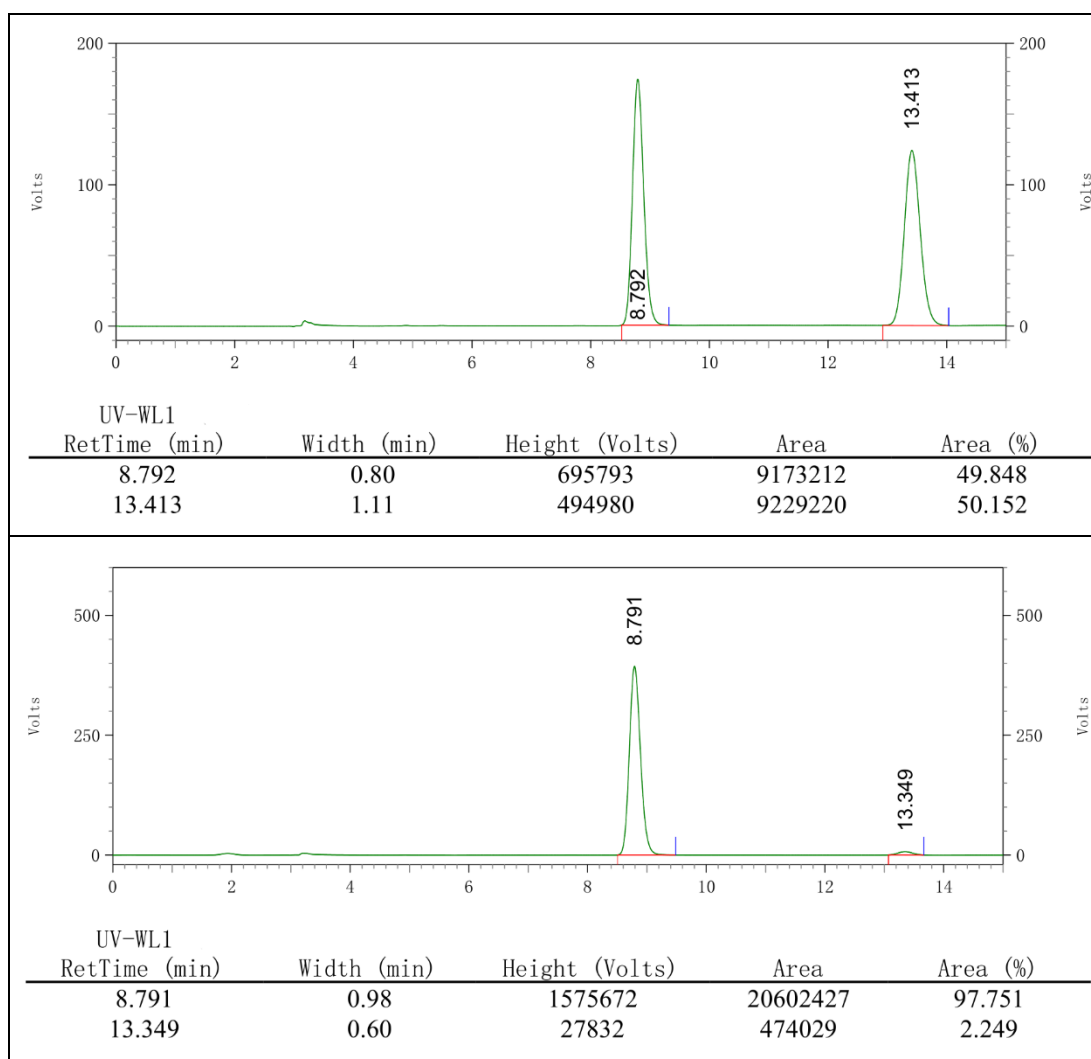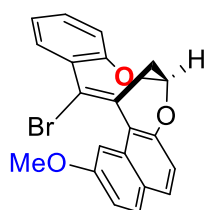

**3r**

**(S)-14-bromo-2-methoxy-8,15-methanobenzo[d]naphtho[1,2-h][1,3]dioxonine (3r)**

Compound **3r** was synthesized in 84% yield (199 mg, 0.6 mmol scale) under condition [A]. **3r** was purified by silica gel column chromatography using PE:EA (60:1 to 50:1) as eluent.

White solid. ( $R_f$  = 0.5, PE/EA = 20:1)

**$^1\text{H}$  NMR** (400 MHz,  $\text{CDCl}_3$ )  $\delta$  7.70 (d,  $J$  = 8.9 Hz, 2H), 7.64 (dd,  $J$  = 7.6, 1.8 Hz, 1H), 7.37 – 7.30 (m, 1H), 7.30 – 7.26 (m, 1H), 7.25 (s, 1H), 7.12 (d,  $J$  = 8.0 Hz, 1H), 7.10 – 7.02 (m, 2H), 6.61 (d,  $J$  = 1.9 Hz, 1H), 4.00 (s, 3H), 3.07 (d,  $J$  = 13.2 Hz, 1H), 2.53 (dd,  $J$  = 13.2, 2.1 Hz, 1H).

**$^{13}\text{C}$  NMR** (100 MHz,  $\text{CDCl}_3$ )  $\delta$  157.97, 151.51, 148.98, 133.67, 132.04, 131.29, 130.74, 129.66, 129.47, 129.07, 124.61, 124.53, 122.91, 122.02, 116.99, 115.57, 114.83, 110.75, 105.20, 55.47, 35.14.

**HRMS (APCI)**  $m/z$  Calcd for  $\text{C}_{21}\text{H}_{16}\text{BrO}_3^+[\text{M} + \text{H}]^+$ : 395.0277, Found: 395.0265.

**Optical Rotation:**  $[\alpha]_{\text{D}}^{25} = -199.6^\circ$  ( $c$  = 0.5, acetone).

**HPLC analysis:** Chiralcel AD-H (Hexane/*i*-PrOH = 95:5, flow rate = 1.0 mL/min, wave length = 254 nm),  $t_{\text{R}}$  = 8.998 min (major),  $t_{\text{R}}$  = 11.038 min (minor), 93% ee.

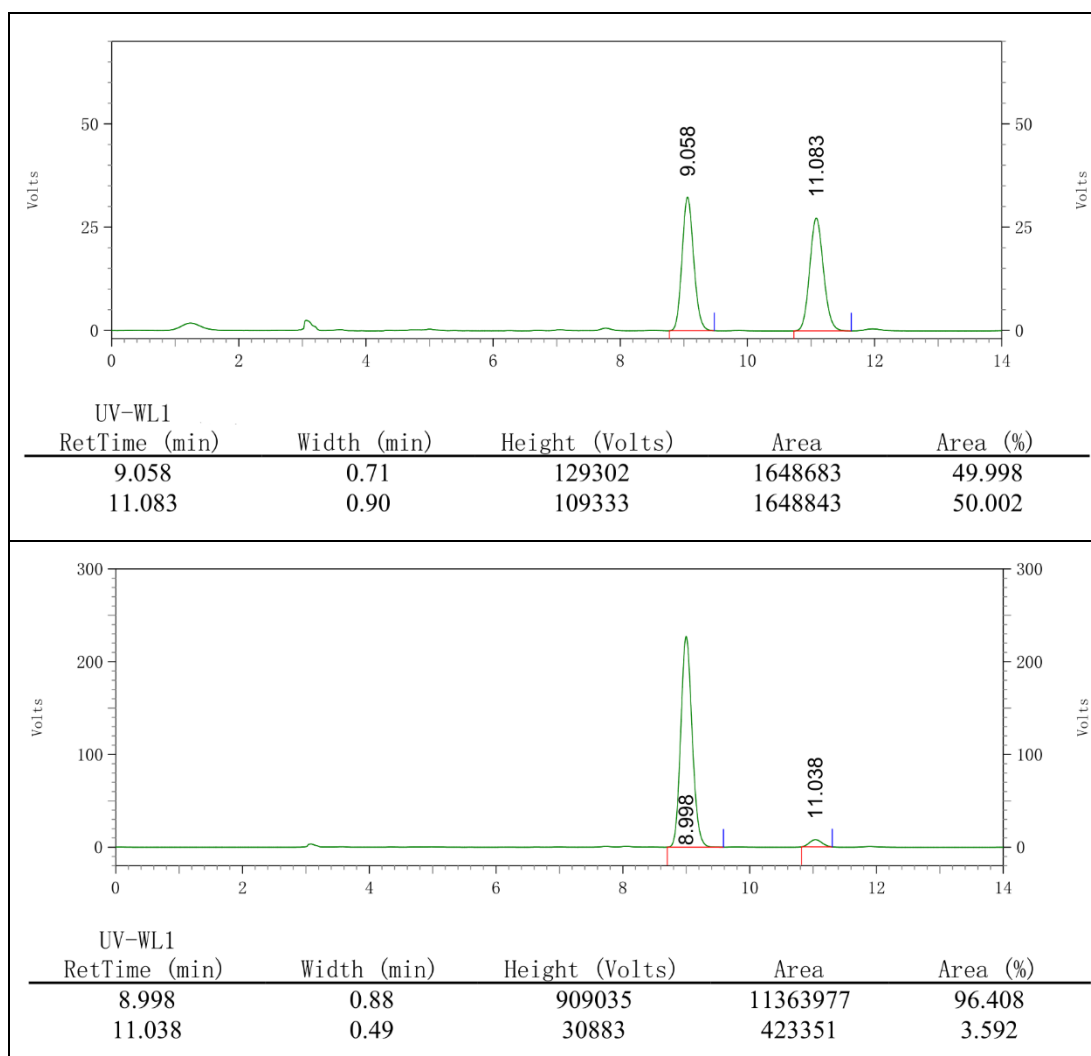

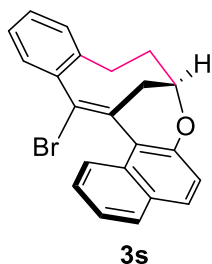

**(S, Z)-15-bromo-9,10-dihydro-8H-8,16-methanobenzo[f]naphtho[2,1-b]oxecine (3s)**

Compound **3s** was synthesized in 33% yield (75 mg, 0.6 mmol scale) under condition [A]. **3s** was purified by silica gel column chromatography using PE:EA (60:1 to 50:1) as eluent.

Yellow solid. ( $R_f = 0.5$ , PE/EA = 20:1)

**$^1\text{H NMR}$**  (600 MHz,  $\text{CDCl}_3$ )  $\delta$  8.08 (d,  $J = 8.4$  Hz, 1H), 7.81 (d,  $J = 8.2$  Hz, 1H), 7.77 (d,  $J = 8.8$  Hz, 1H), 7.61 – 7.52 (m, 2H), 7.38 (t,  $J = 7.5$  Hz, 1H), 7.35 – 7.29 (m, 3H), 7.18 (d,  $J = 8.8$  Hz, 1H), 4.73 – 4.70 (m, 1H), 3.07 (t,  $J = 13.5$  Hz, 1H), 2.72 – 2.67 (m, 1H), 2.63 (d,  $J = 12.6$  Hz, 1H), 2.52 – 2.43 (m, 2H), 1.81 – 1.74 (m, 1H).

**$^{13}\text{C NMR}$**  (150 MHz,  $\text{CDCl}_3$ )  $\delta$  152.97, 141.81, 140.15, 130.40, 129.49, 129.45, 129.18, 128.92, 128.59, 128.38, 128.15, 126.50, 126.48, 125.73, 123.54, 122.59, 118.64, 118.43, 73.90, 36.14, 35.34, 27.53.

**HRMS (APCI)**  $m/z$  Calcd for  $\text{C}_{22}\text{H}_{18}\text{BrO}^+[\text{M} + \text{H}]^+$ : 377.0536, Found: 377.0521.

**Optical Rotation:**  $[\alpha]_{\text{D}}^{25} = -442.4^\circ$  ( $c = 0.55$ , DCM).

**HPLC analysis:** Chiralcel OD-H (Hexane/*i*-PrOH = 99:1, flow rate = 1.0 mL/min, wave length = 254 nm),  $t_{\text{R}} = 8.891$  min (major),  $t_{\text{R}} = 12.790$  min (minor), 93% ee.

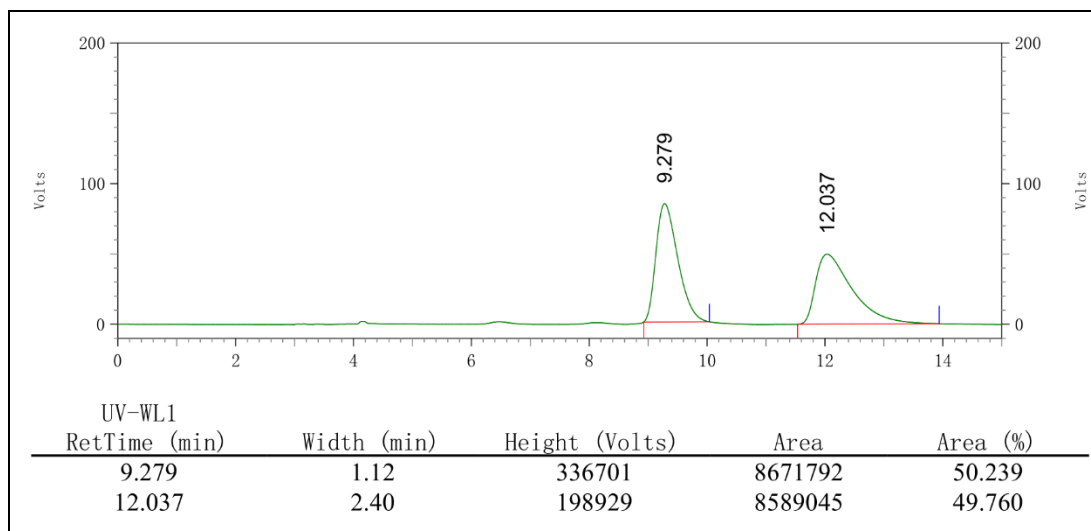

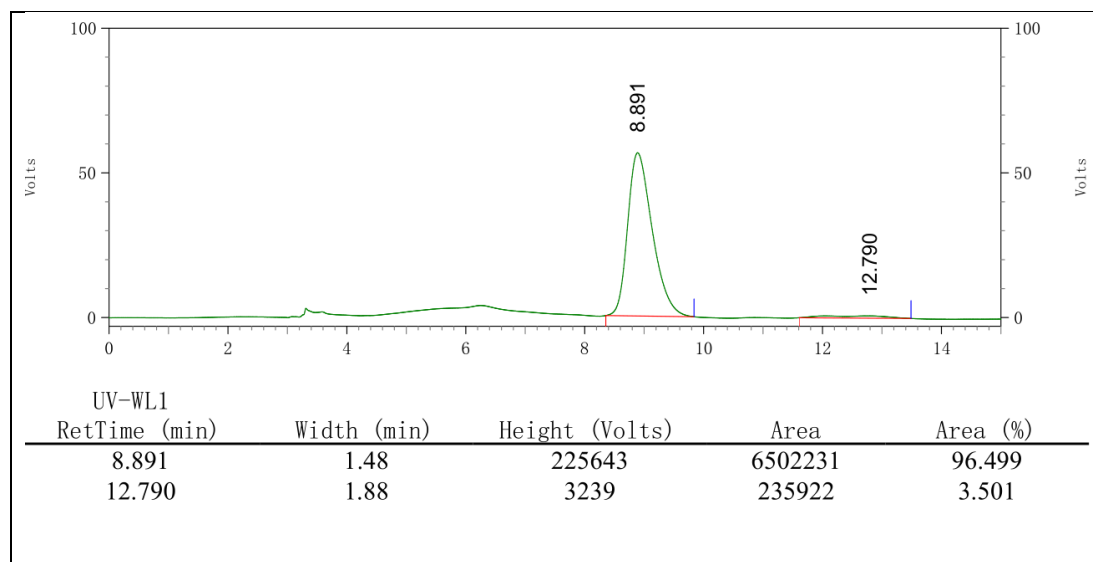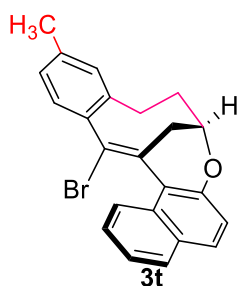

**(*S, Z*)-15-bromo-12-methyl-9,10-dihydro-8H-8,16-methanobenzo[*f*]naphtho[2,1-*b*]oxecine (3t)**

Compound **3t** was synthesized in 35% yield (82 mg, 0.6 mmol scale) under condition [A]. **3t** was purified by silica gel column chromatography using PE:EA (60:1 to 50:1) as eluent.

Yellow solid. ( $R_f = 0.5$ , PE/EA = 20:1)

**$^1\text{H NMR}$**  (600 MHz,  $\text{CDCl}_3$ )  $\delta$  8.08 (d,  $J = 8.4$  Hz, 1H), 7.81 (d,  $J = 8.2$  Hz, 1H), 7.76 (d,  $J = 8.8$  Hz, 1H), 7.55 (t,  $J = 7.6$  Hz, 1H), 7.44 (d,  $J = 7.7$  Hz, 1H), 7.38 (t, 1H), 7.18 (d,  $J = 8.8$  Hz, 1H), 7.16 – 7.09 (m, 2H), 4.73 – 4.69 (m, 1H), 3.03 (t,  $J = 13.5$  Hz, 1H), 2.67 – 2.62 (m, 2H), 2.50 – 2.42 (m, 2H), 2.38 (s, 3H), 1.76 (t,  $J = 14.0$  Hz, 1H).

**$^{13}\text{C NMR}$**  (150 MHz,  $\text{CDCl}_3$ )  $\delta$  152.99, 141.67, 139.08, 137.42, 130.17, 130.13, 129.41, 128.91, 128.44, 128.41, 128.12, 127.29, 126.54, 125.67, 123.50, 122.70, 118.91, 118.43, 74.02, 36.12, 35.39, 27.50, 21.34.

**HRMS (APCI)**  $m/z$  Calcd for  $\text{C}_{23}\text{H}_{20}\text{BrO}^+[\text{M} + \text{H}]^+$ : 391.0692, Found: 391.0683.

**Optical Rotation:**  $[\alpha]_{\text{D}}^{25} = -266.6^\circ$  ( $c = 0.5$ , DCM).

**HPLC analysis:** Chiralcel AD-H (Hexane/*i*-PrOH = 98:2, flow rate = 1.0 mL/min, wave length = 254 nm),  $t_R = 4.950$  min (major),  $t_R = 5.573$  min (minor), 94% ee.

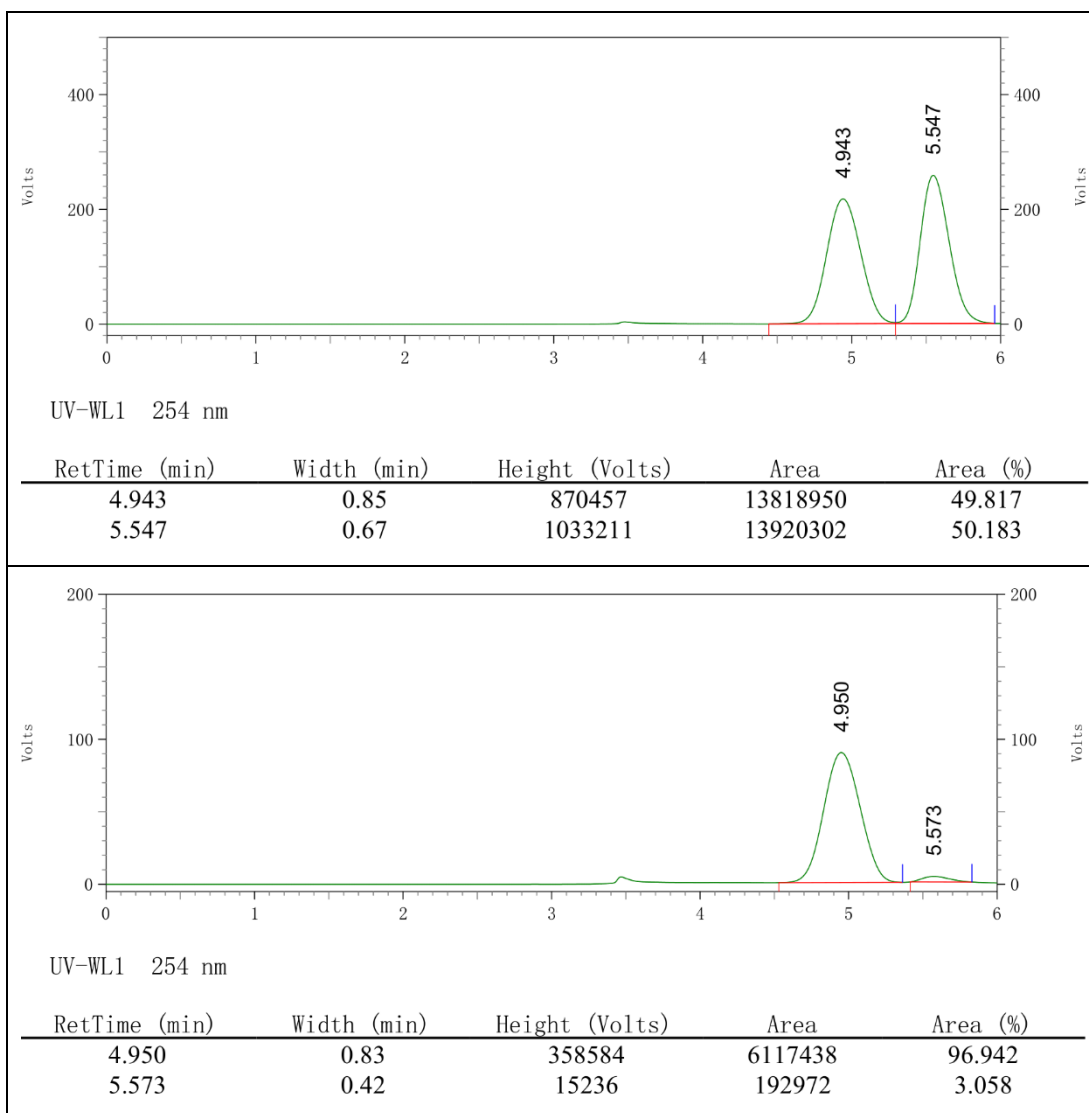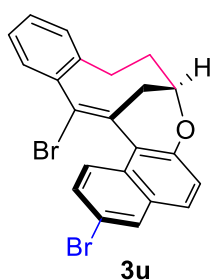

**(S, Z)-3,15-dibromo-9,10-dihydro-8H-8,16-methanobenzo[f]naphtho[2,1-b]oxecine (3u)**

Compound **3u** was synthesized in 32% yield (88 mg, 0.6 mmol scale) under condition [A]. **3u** was purified by silica gel column chromatography using PE:EA (60:1 to 50:1) as eluent.

White solid. ( $R_f = 0.5$ , PE/EA = 20:1)

$^1\text{H NMR}$  (600 MHz,  $\text{CDCl}_3$ )  $\delta$  8.02 – 7.86 (m, 2H), 7.67 (d,  $J = 8.8$  Hz, 1H), 7.61 (dd,  $J = 8.8, 1.9$  Hz, 1H), 7.58 – 7.51 (m, 1H), 7.37 – 7.28 (m, 3H), 7.19 (d,  $J = 8.8$  Hz, 1H), 4.75 – 4.70 (m, 1H), 3.03 (t,  $J = 13.5$  Hz, 1H), 2.69 (dd,  $J = 14.1$ ,

7.0 Hz, 1H), 2.63 (d,  $J = 12.7$  Hz, 1H), 2.49 (dd,  $J = 15.2, 6.9$  Hz, 1H), 2.44 (dd,  $J = 12.7, 8.7$  Hz, 1H), 1.78 (t,  $J = 14.1$  Hz, 1H).

$^{13}\text{C}$  NMR (150 MHz,  $\text{CDCl}_3$ )  $\delta$  153.29, 141.71, 139.93, 130.04, 130.01, 129.92, 129.48, 129.31, 129.01, 128.55, 128.53, 128.27, 126.93, 126.56, 122.66, 119.56, 119.13, 117.23, 74.09, 36.08, 35.18, 27.49.

HRMS (APCI)  $m/z$  Calcd for  $\text{C}_{22}\text{H}_{17}\text{Br}_2\text{O}^+[\text{M} + \text{H}]^+$ : 456.9620, Found: 456.9609.

Optical Rotation:  $[\alpha]_{\text{D}}^{25} = -388^\circ$  ( $c = 0.3$ , DCM).

HPLC analysis: Chiralcel ADAD-H (Hexane/*i*-PrOH = 99:1, flow rate = 1.0 mL/min, wave length = 254 nm),  $t_{\text{R}} = 16.659$  min (minor),  $t_{\text{R}} = 19.382$  min (major), 93% ee.

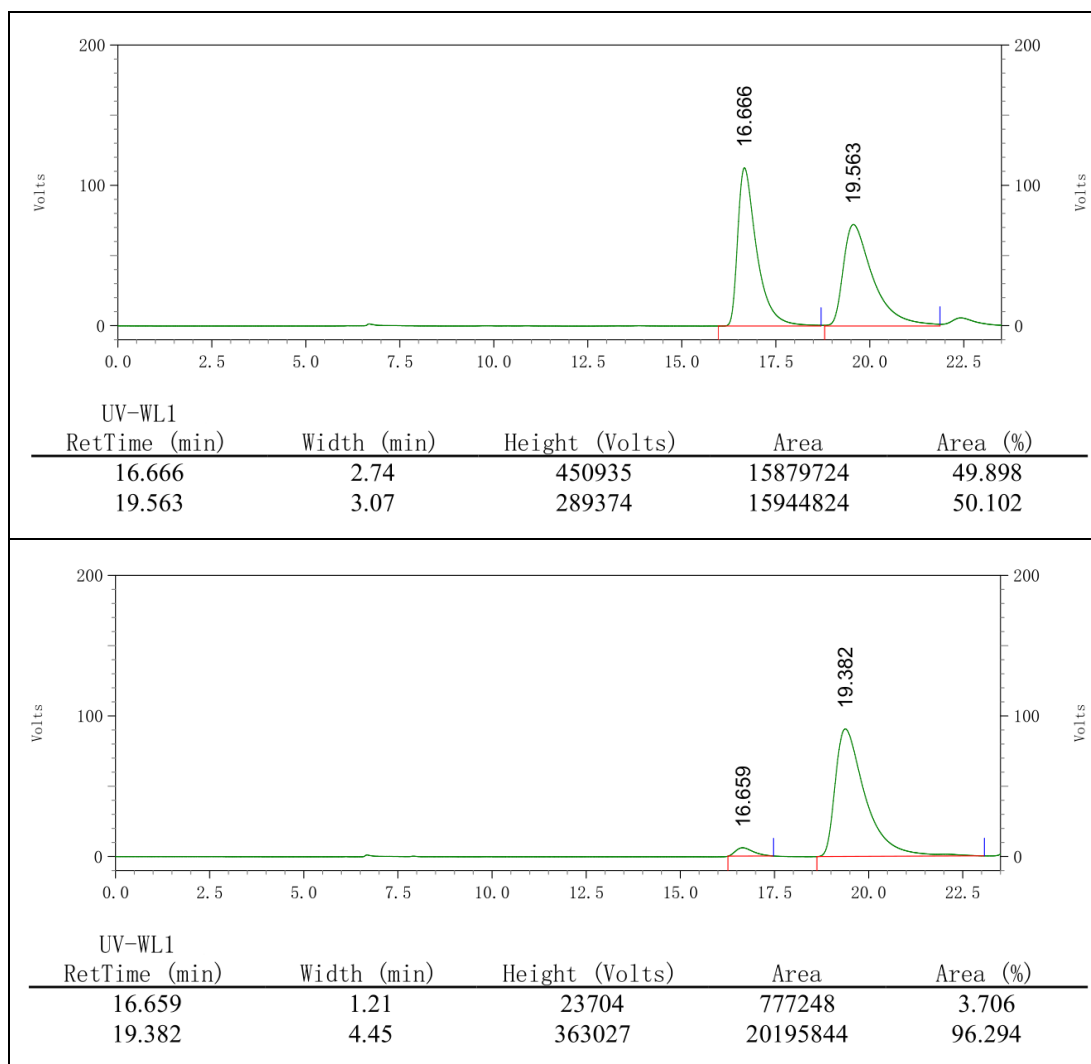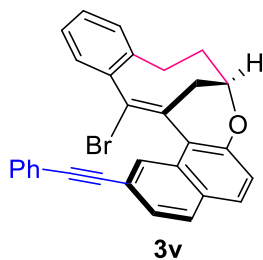

(*S, Z*)-15-bromo-2-(phenylethynyl)-9,10-dihydro-8H-8,16-methanobenzo[*f*]naphtho[2,1-*b*]oxecine (**3v**)

Compound **3v** was synthesized in 33% yield (95 mg, 0.6 mmol scale) under condition [A]. **3v** was purified by silica gel column chromatography using PE:EA (60:1 to 50:1) as eluent.

White solid. ( $R_f = 0.5$ , PE/EA = 20:1)

**<sup>1</sup>H NMR** (600 MHz, CDCl<sub>3</sub>)  $\delta$  8.27 (s, 1H), 7.76 (dd,  $J = 16.8, 8.6$  Hz, 2H), 7.63 (d,  $J = 7.2$  Hz, 3H), 7.49 (d,  $J = 8.4$  Hz, 1H), 7.41 – 7.35 (m, 3H), 7.33 (d,  $J = 5.7$  Hz, 3H), 7.19 (d,  $J = 8.7$  Hz, 1H), 4.74 – 4.72 (m, 1H), 3.05 (s, 1H), 2.70 (d,  $J = 7.1$  Hz, 1H), 2.64 (s, 1H), 2.51 – 2.45 (m, 2H), 1.79 (d,  $J = 14.2$  Hz, 1H).

**<sup>13</sup>C NMR** (150 MHz, CDCl<sub>3</sub>)  $\delta$  153.56, 141.71, 140.05, 131.75, 129.98, 129.93, 129.44, 129.29, 129.24, 128.73, 128.35, 128.29, 128.24, 128.13, 126.54, 126.24, 123.47, 122.45, 120.55, 119.18, 119.08, 90.39, 89.63, 74.07, 36.14, 35.21, 27.50.

**HRMS (APCI)**  $m/z$  Calcd for C<sub>30</sub>H<sub>22</sub>BrO<sup>+</sup>[M + H]<sup>+</sup>: 477.0849, Found: 477.0841.

**Optical Rotation:**  $[\alpha]_D^{25} = -411.4^\circ$  ( $c = 0.5$ , DCM).

**HPLC analysis:** Chiralcel ADAD-H (Hexane/*i*-PrOH = 95:5, flow rate = 1.0 mL/min, wave length = 254 nm),  $t_R = 10.129$  min (major),  $t_R = 10.547$  min (minor), 92% ee.

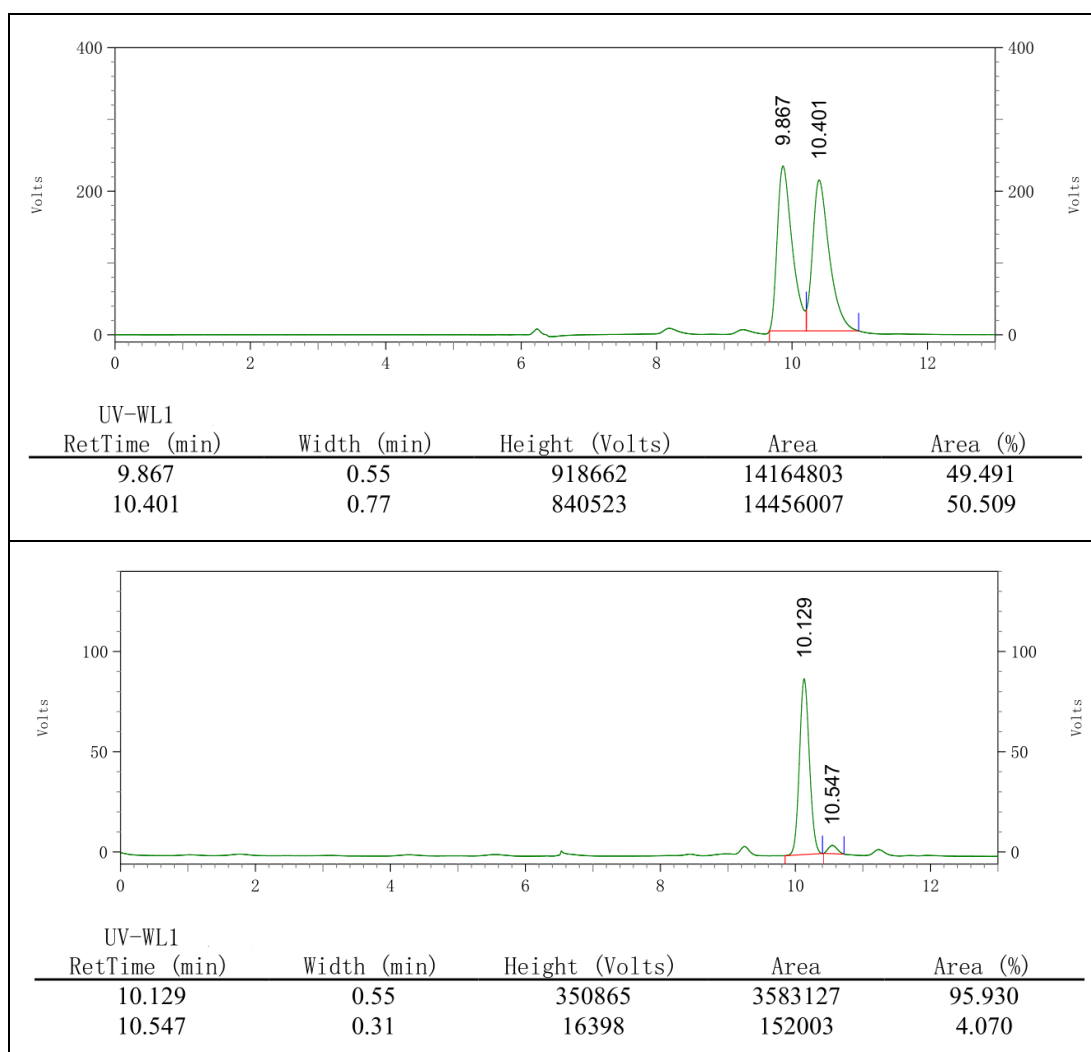



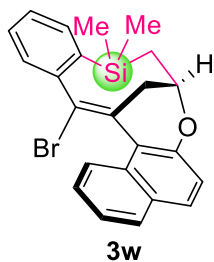

**(R, Z)-16-bromo-5,5-dimethyl-6,7-dihydro-5H-7,15-methanobenzo[e]naphtho[1,2-i][1,4]oxasilecine (3w)**

Compound **3w** was synthesized in 52% yield (131 mg, 0.6 mmol scale) under condition [A]. **3w** was purified by silica gel column chromatography using PE:EA (60:1 to 50:1) as eluent.

White solid. ( $R_f$  = 0.5, PE/EA = 20:1)

**$^1\text{H NMR}$**  (600 MHz,  $\text{CDCl}_3$ )  $\delta$  8.12 (d,  $J$  = 8.4 Hz, 1H), 7.88 – 7.70 (m, 2H), 7.65 (d,  $J$  = 7.8 Hz, 1H), 7.56 (t,  $J$  = 7.7 Hz, 1H), 7.52 (d,  $J$  = 7.5 Hz, 1H), 7.48 (t,  $J$  = 7.6 Hz, 1H), 7.41 – 7.28 (m, 2H), 7.10 (d,  $J$  = 8.8 Hz, 1H), 4.99 – 4.90 (m, 1H), 2.88 (d,  $J$  = 12.6 Hz, 1H), 2.54 (dd,  $J$  = 12.6, 5.9 Hz, 1H), 1.51 (dd,  $J$  = 14.7, 7.4 Hz, 1H), 1.29 (dd,  $J$  = 14.7, 4.9 Hz, 1H), 0.39 (s, 3H), 0.24 (s, 3H).

**$^{13}\text{C NMR}$**  (150 MHz,  $\text{CDCl}_3$ )  $\delta$  152.28, 145.87, 138.59, 133.85, 130.36, 130.33, 129.36, 129.03, 128.82, 128.71, 128.18, 127.77, 126.60, 125.66, 123.32, 121.63, 119.10, 118.58, 75.09, 35.96, 23.81, -0.93, -1.74.

**HRMS (APCI)**  $m/z$  Calcd for  $\text{C}_{23}\text{H}_{22}\text{BrOSi}^+[\text{M} + \text{H}]^+$ : 421.0618, Found: 421.0607.

**Optical Rotation:**  $[\alpha]_{\text{D}}^{25} = -323.3^\circ$  ( $c$  = 0.75, DCM).

**HPLC analysis:** Chiralcel ADAD-H (Hexane/*i*-PrOH = 90:10, flow rate = 1.0 mL/min, wave length = 254 nm),  $t_{\text{R}} = 7.426$  min (major),  $t_{\text{R}} = 7.768$  min (minor), 97% ee.

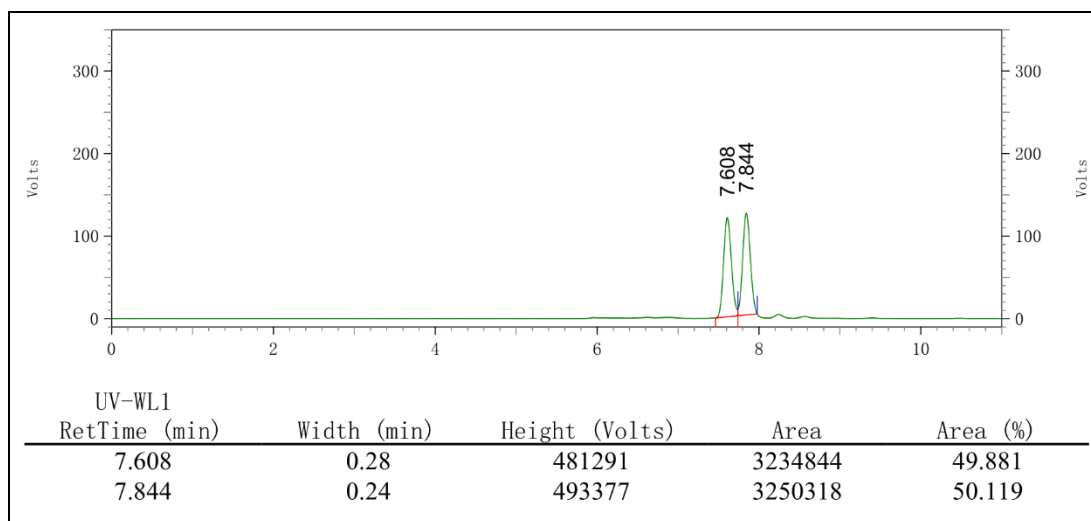

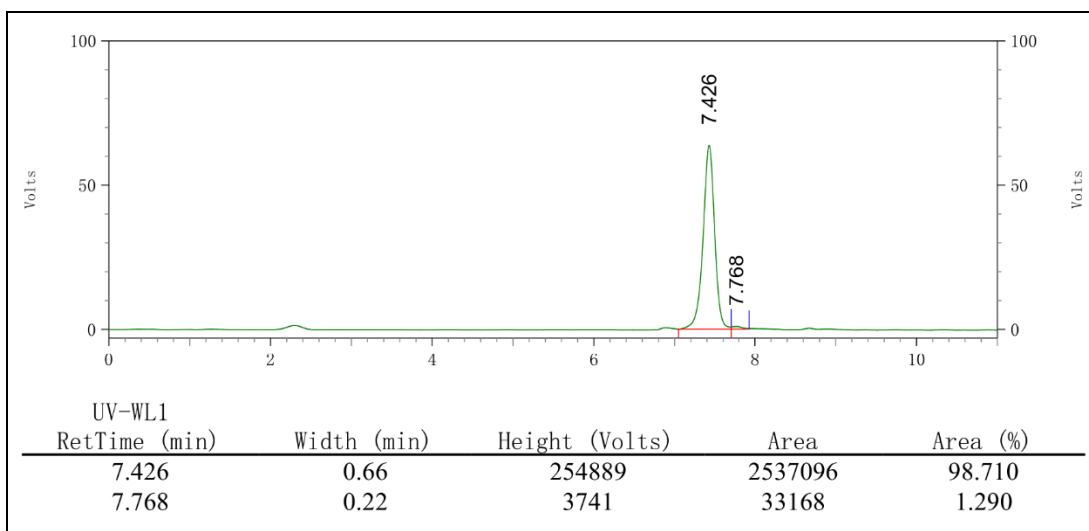

### Unsuccessful attempt for the construction of the [6.3.1] ring system

We synthesized substrate **1x** and evaluated the construction of the [6.3.1] ring system under the standard reaction conditions. Unfortunately, we did not observe the trace of the generation of the [6.3.1] ring system.

## VIII. Mechanistic studies

### 1) Control experiments

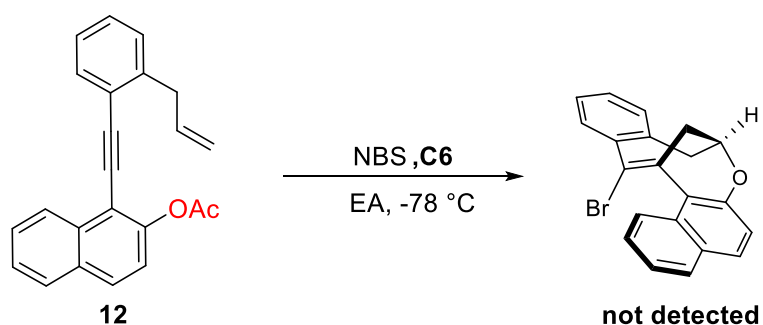

Compound **12** was prepared according to the general procedure. The control experiment was carried out following the general procedure (Condition [A]).

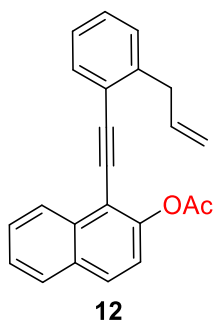

### 1-((2-allylphenyl)ethynyl)naphthalen-2-yl acetate (**12**)

Compound **12** is an unknown compound, and was synthesized in 43% yield (280 mg, 2 mmol scale) following the general procedure (**Method A**).

yellow solid. ( $R_f = 0.5$ , PE/EA = 5:1)

$^1\text{H NMR}$  (400 MHz,  $\text{CDCl}_3$ )  $\delta$  8.39 (d,  $J = 8.4$  Hz, 1H), 7.76 – 7.66 (m, 2H), 7.60 (d,  $J = 7.5$  Hz, 1H), 7.51 (t,  $J = 7.6$  Hz, 1H), 7.39 (t,  $J = 7.6$  Hz, 1H), 7.27 – 7.12 (m, 4H), 6.06 (ddt,  $J = 16.8, 10.1, 6.6$  Hz, 1H), 5.19 – 5.03 (m, 2H), 3.70 (d,  $J = 6.7$  Hz, 2H), 2.33 (s, 3H).

$^{13}\text{C NMR}$  (100 MHz,  $\text{CDCl}_3$ )  $\delta$  168.66, 149.94, 141.54, 136.14, 133.53, 132.18, 131.00, 129.45, 128.74, 128.69, 128.01, 127.14, 126.04, 125.93, 125.83, 122.39, 121.00, 116.20, 113.07, 97.85, 86.26, 38.57, 20.75.

**HRMS (ESI)**  $m/z$  Calcd for  $\text{C}_{23}\text{H}_{16}\text{NaO}_2^+[\text{M} + \text{Na}]^+$ : 349.1199, Found: 349.1186.

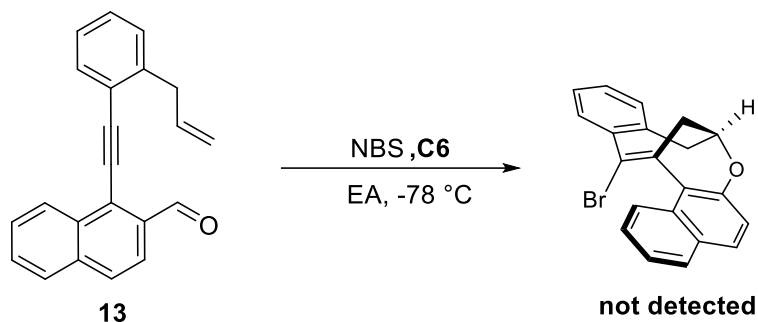

Compound **13** was prepared according to the general procedure as described for **S6**. The control experiment was carried out following the general procedure (Condition [A]).

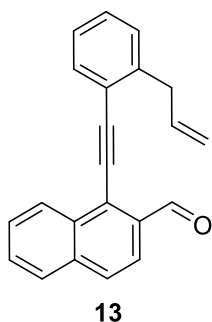

### 1-(2-allylphenyl)ethynyl-2-naphthaldehyde (**13**)

Compound **13** was synthesized following the general procedure (**Method A**).

Pale yellow solid. ( $R_f = 0.6$ , PE/EA = 10:1)

$^1\text{H NMR}$  (400 MHz,  $\text{CDCl}_3$ )  $\delta$  10.88 (s, 1H), 8.61 (dd,  $J = 6.3, 3.4$  Hz, 1H), 7.99 (d,  $J = 8.6$  Hz, 1H), 7.93 – 7.82 (m, 2H), 7.74 – 7.62 (m, 3H), 7.39 (t,  $J = 7.4$  Hz, 1H), 7.31 (dd,  $J = 13.9, 7.1$  Hz, 2H), 6.16 – 6.03 (m, 1H), 5.20 – 5.01 (m, 2H), 3.75 (d,  $J = 6.0$  Hz, 2H).

$^{13}\text{C NMR}$  (100 MHz,  $\text{CDCl}_3$ )  $\delta$  192.09, 142.12, 136.16, 135.79, 134.19, 133.14, 132.71, 129.59, 129.34, 129.31, 128.86, 128.47, 127.67, 127.56, 127.27, 126.43, 122.08, 121.99, 116.56, 101.05, 86.57, 38.89.

**HRMS (ESI)**  $m/z$  Calcd for  $\text{C}_{22}\text{H}_{16}\text{NaO}^+[\text{M} + \text{Na}]^+$ : 319.1093, Found: 319.1105.

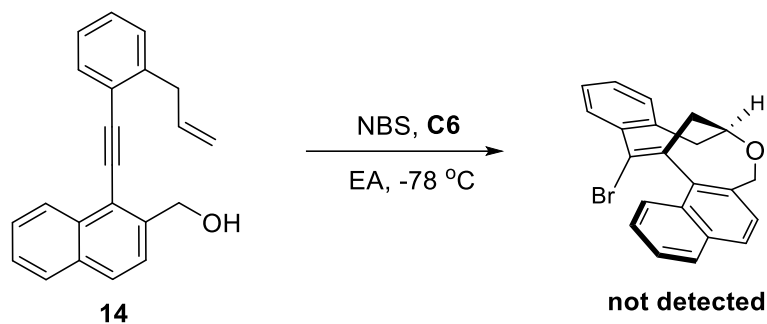

Compound **14** was prepared according to the general procedure as following. The control experiment was carried out following the general procedure (Condition [A]).

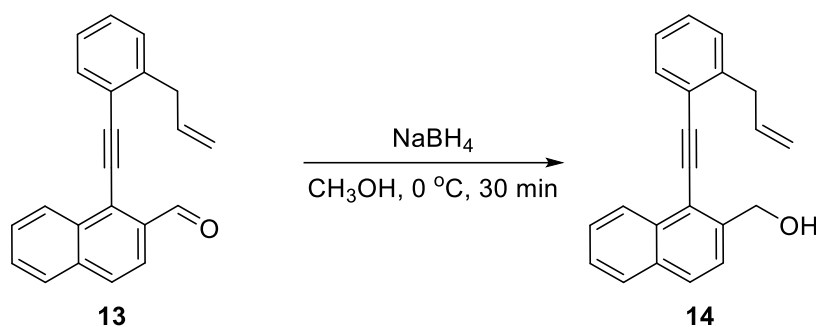

General procedure for the synthesis of **14**:

To a solution of the **13** (1.48 g, 5.0 mmol, 1.0 equiv.) in methanol (0.5 M) was added NaBH<sub>4</sub> (190 mg, 5 mmol, 1.0 equiv.) under a nitrogen atmosphere at 0°C. After 30 min, the mixture was quenched with saturated aqueous NH<sub>4</sub>Cl solution, extracted with EA, and then washed 3 times with brine, dried over Na<sub>2</sub>SO<sub>4</sub>, and concentrated in vacuo. The crude product was purified by column chromatography on silica gel (PE/EA = 10:1) to afford compound **14** (90% yield).

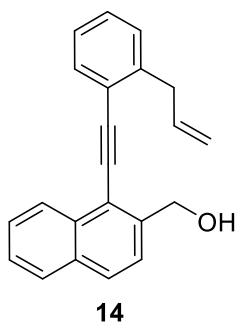

**(1-((2-allylphenyl)ethynyl)naphthalen-2-yl)methanol (14)**

Pale yellow solid. ( $R_f$  = 0.4, PE/EA = 5:1)

<sup>1</sup>H NMR (400 MHz, CDCl<sub>3</sub>) δ 8.43 (d,  $J$  = 8.3 Hz, 1H), 7.82 (d,  $J$  = 8.5 Hz, 2H), 7.71 – 7.44 (m, 4H), 7.36 – 7.19 (m, 3H), 6.18 – 6.02 (m, 1H), 5.26 – 4.96 (m, 4H), 3.73 (d,  $J$  = 6.3 Hz, 2H), 2.28 (s, 1H).

<sup>13</sup>C NMR (100 MHz, CDCl<sub>3</sub>) δ 141.59, 141.19, 136.44, 133.27, 132.54, 132.48, 129.12, 128.90, 128.80, 128.18, 126.97, 126.27, 126.14, 125.11, 122.69, 118.40, 116.28, 98.30, 88.55, 64.32, 38.82.

HRMS (ESI)  $m/z$  Calcd for C<sub>22</sub>H<sub>17</sub>O<sup>+</sup>[M - H]<sup>+</sup>: 297.1285, Found: 297.1279.

## 2) Density Functional Theory (DFT) Experiments

### Computational Methods.

All density functional theory (DFT) calculations were performed with the Gaussian 09<sup>1</sup> software package. Geometries were optimized in toluene with the SMD solvation model<sup>2</sup> using the B3-LYP-D3<sup>3</sup> functional and a basis set of 6-31G(d)<sup>4</sup>. Vibrational frequencies were computed at the same level to evaluate its zero-point vibrational energy and thermal corrections at 298 K, and to check whether each optimized structure is a transition state or not. The single-point energies and solvent effects in ethylethanoate were computed at the M06-2X level of theory with the 6-311+G(d,p)<sup>5</sup> basis set, using the solvent-phase optimized structures. Intrinsic reaction coordinate (IRC) calculations have demonstrated that the transition state connects two corresponding intermediates along the reaction coordinate.

### B3-LYP-D3 and M06-2X calculated absolute energies, and free energies of all structures

| Geometry | $E_{(\text{elec-B3-LYP-D3})}^1$ | $G_{(\text{corr-B3-LYP-D3})}^2$ | $H_{(\text{corr-B3-LYP-D3})}^3$ | $E_{(\text{solv-M06-2X})}^4$ | IF <sup>5</sup>  |
|----------|---------------------------------|---------------------------------|---------------------------------|------------------------------|------------------|
| VQM      | -3495.19                        | 0.2686                          | 0.3444                          | -3497.78                     |                  |
| TS1      | -5193.34                        | 0.7559                          | 0.8985                          | -5195.68                     | -326.12 <i>i</i> |
| TS2      | -3495.17                        | 0.2717                          | 0.3429                          | -3497.75                     | -382.09 <i>i</i> |
| TS3      | -3495.17                        | 0.2733                          | 0.3431                          | -3497.74                     | -388.57 <i>i</i> |
| P1       | -3495.25                        | 0.2818                          | 0.3482                          | -3497.85                     |                  |
| P2       | -3495.27                        | 0.2813                          | 0.3482                          | -3497.86                     |                  |
| cat      | -1698.13                        | 0.4576                          | 0.5532                          | -1697.90                     |                  |
| int1     | -5193.35                        | 0.7493                          | 0.9001                          | -5195.70                     |                  |
| OMe-TS2  | -3609.70                        | 0.3035                          | 0.3786                          | -3612.27                     | -368.24 <i>i</i> |
| OMe-TS3  | -3609.71                        | 0.3026                          | 0.3792                          | -3612.28                     | -184.53 <i>i</i> |
| O-TS2    | -3531.07                        | 0.2470                          | 0.3185                          | -3533.66                     | -314.23 <i>i</i> |
| O-TS3    | -3531.06                        | 0.2486                          | 0.3182                          | -3533.65                     | -406.59 <i>i</i> |

<sup>1</sup>The electronic energy calculated by B3-LYP-D3 in ethylethanoate solvent. <sup>2</sup>The thermal correction to Gibbs free energy calculated by B3-LYP-D3 in ethylethanoate solvent. <sup>3</sup>The thermal correction to enthalpy calculated by B3-LYP-D3 in ethylethanoate solvent. <sup>4</sup>The electronic energy calculated by M06-2X in ethylethanoate solvent. <sup>5</sup>The B3-LYP-D3 calculated imaginary frequencies for the transition states.

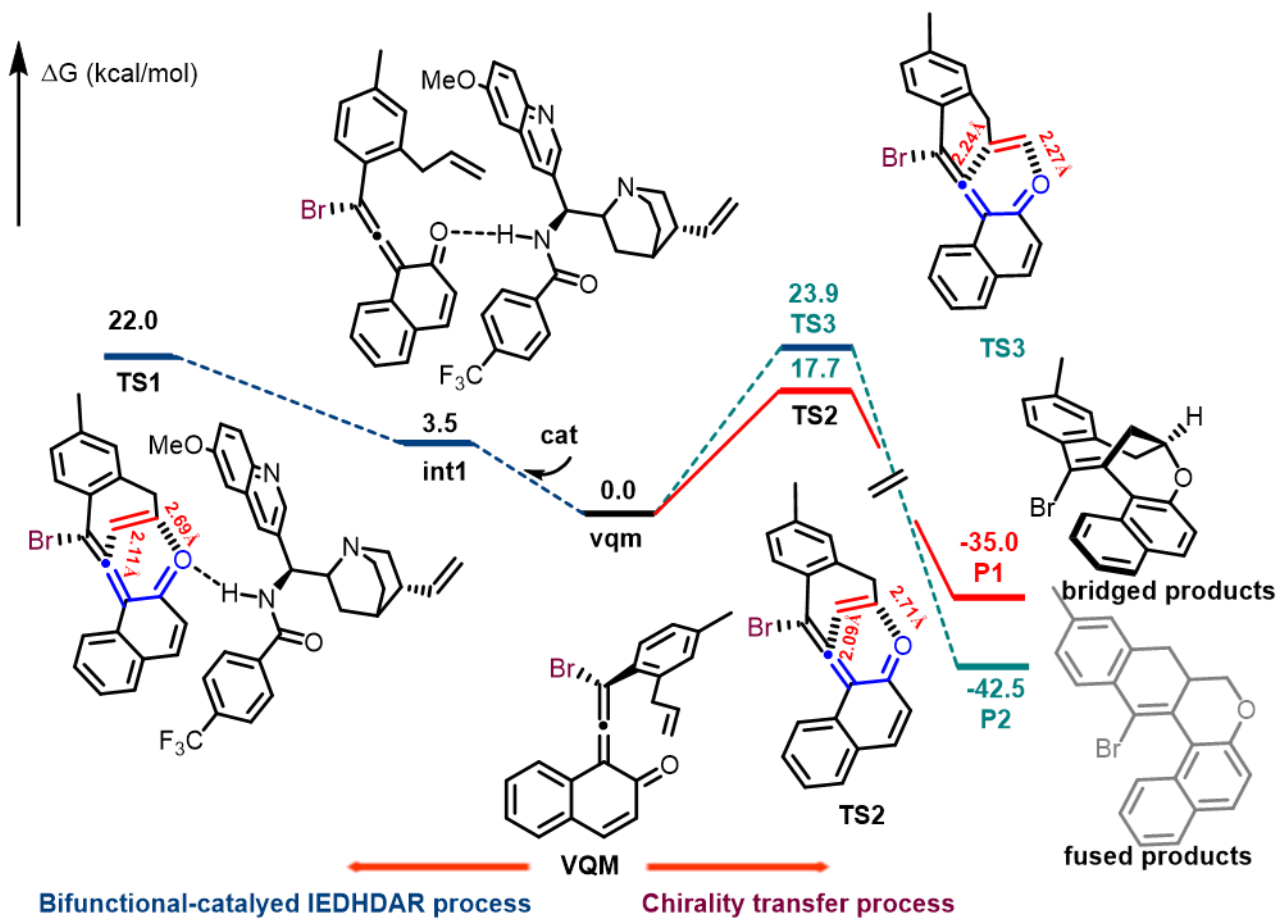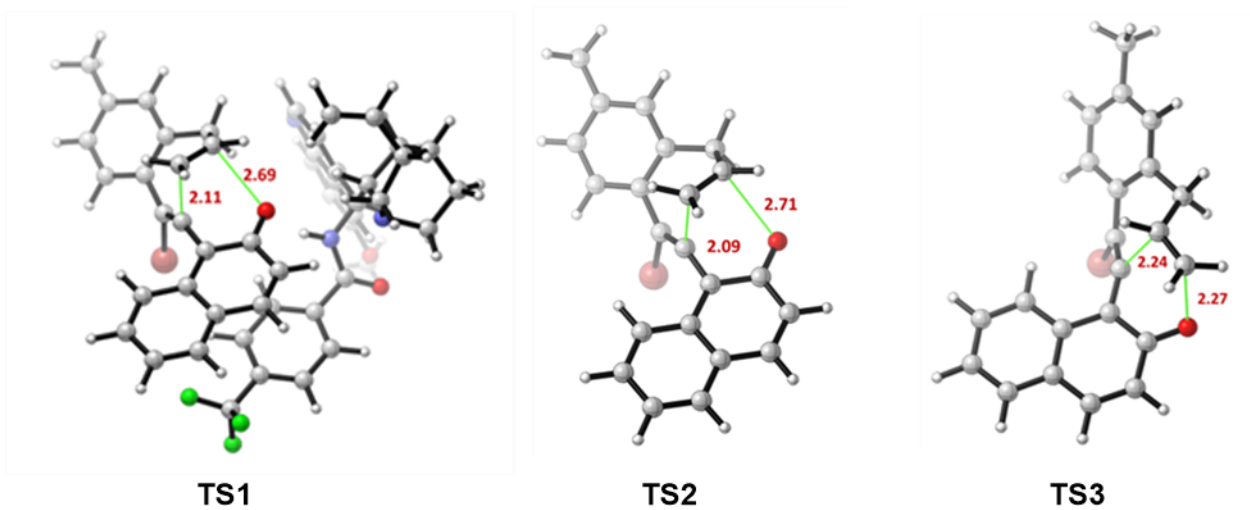

b. Optimized transition state structures associated with pathway A-1 and pathway A-2 for three different substituted VQM intermediates

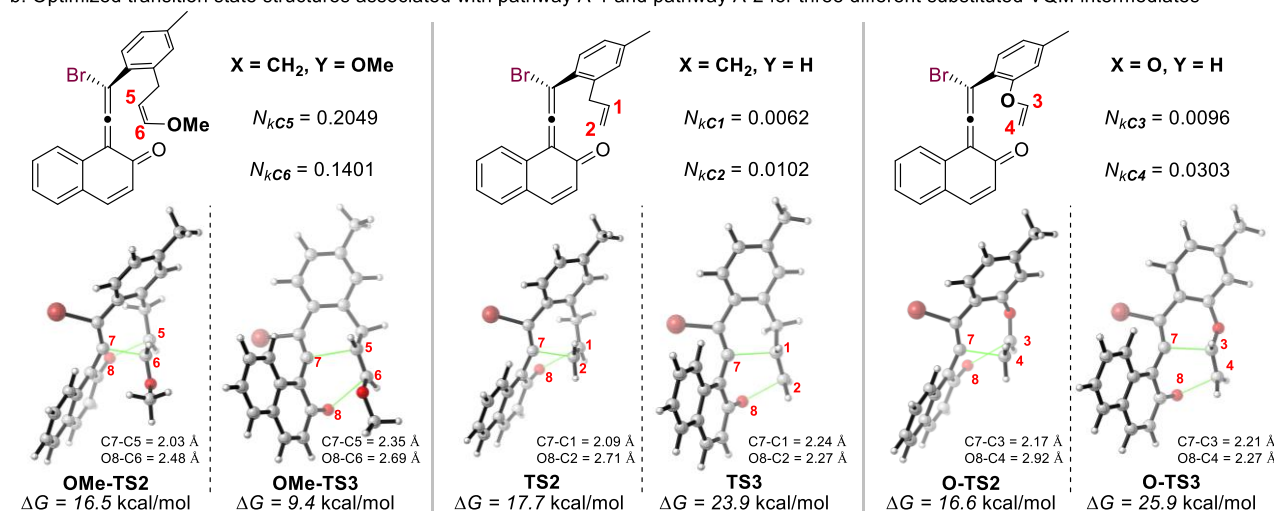

#### References:

- 9 Gaussian 09, Revision D.01, M. J. Frisch, G. W. Trucks, H. B. Schlegel, G. E. Scuseria, M. A. Robb, J. R. Cheeseman, G. Scalmani, V. Barone, G. A. Petersson, H. Nakatsuji, X. Li, M. Caricato, A. Marenich, J. Bloino, B. G. Janesko, R. Gomperts, B. Mennucci, H. P. Hratchian, J. V. Ortiz, A. F. Izmaylov, J. L. Sonnenberg, D. Williams-Young, F. Ding, F. Lipparini, F. Egidi, J. Goings, B. Peng, A. Petrone, T. Henderson, D. Ranasinghe, V. G. Zakrzewski, J. Gao, N. Rega, G. Zheng, W. Liang, M. Hada, M. Ehara, K. Toyota, R. Fukuda, J. Hasegawa, M. Ishida, T. Nakajima, Y. Honda, O. Kitao, H. Nakai, T. Vreven, K. Throssell, J. A. Montgomery, Jr., J. E. Peralta, F. Ogliaro, M. Bearpark, J. J. Heyd, E. Brothers, K. N. Kudin, V. N. Staroverov, T. Keith, R. Kobayashi, J. Normand, K. Raghavachari, A. Rendell, J. C. Burant, S. S. Iyengar, J. Tomasi, M. Cossi, J. M. Millam, M. Klene, C. Adamo, R. Cammi, J. W. Ochterski, R. L. Martin, K. Morokuma, O. Farkas, J. B. Foresman, D. J. Fox, Gaussian, Inc., Wallingford CT, **2016**.
- A. V. Marenich, C. J. Cramer, D. G. Truhlar, *J. Phys. Chem. B* **2009**, *113*, 6378–6396.
- A. D. Becke, *J. Chem. Phys.* **1993**, *98*, 5648–5652; (b) C. Lee, W. Yang, R. G. Parr, *Phys. Rev. B* **1988**, *37*, 785–789.
- (a) Ditchfield, R.; Hehre, W. J.; Pople, J. A. *J. Chem. Phys.* **1971**, *54*, 724–728. (b) Hariharan, P. C.; Pople, J. A. *Theor. Chim. Acta* **1973**, *28*, 213–222. (c) Hehre, W. J.; Ditchfield, R.; Pople, J. A. *J. Chem. Phys.* **1972**, *56*, 2257–2261.
- Krishnan, R., Binkley, J. S., Seeger, R. & Pople, J. A. *J. Chem. Phys.* **1980**, *72*, 650–654.

#### Cartesian coordinates of the structures

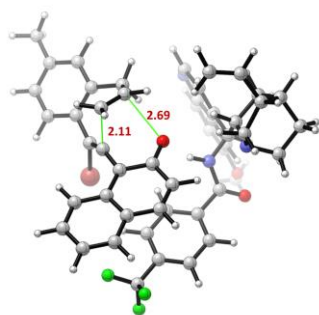

**TS1**

|   |             |             |             |
|---|-------------|-------------|-------------|
| C | -3.91548500 | 2.42402200  | -0.33569900 |
| C | -4.33148900 | 1.68027000  | 1.79159100  |
| C | -3.88788000 | 0.35060000  | 1.48183400  |
| C | -3.43897100 | 0.09423400  | 0.14069200  |
| C | -3.45294800 | 1.14849900  | -0.74692000 |
| H | -5.10344000 | 2.97636700  | 3.32356600  |
| H | -3.92324900 | 3.24256100  | -1.05508700 |
| C | -4.77237700 | 1.96460300  | 3.10779800  |
| C | -3.89984000 | -0.62801400 | 2.50307700  |
| H | -3.11172600 | 1.03191100  | -1.76876700 |
| C | -4.33690100 | -0.31699000 | 3.78212100  |
| C | -4.77854100 | 0.99746200  | 4.08879200  |
| H | -3.55391400 | -1.63954500 | 2.32039900  |
| H | -5.11817400 | 1.24972100  | 5.08650900  |
| N | -4.34385900 | 2.69894100  | 0.87801500  |
| O | -4.30884800 | -1.33418500 | 4.68596000  |
| C | -4.70411400 | -1.07190600 | 6.03042500  |
| H | -5.75394900 | -0.75668800 | 6.09189200  |
| H | -4.58462400 | -2.01743000 | 6.56392700  |
| H | -4.06618800 | -0.31160800 | 6.49935900  |
| C | -2.89089800 | -1.28422800 | -0.21692500 |
| H | -3.53042800 | -2.04362600 | 0.23683800  |
| N | -1.57586500 | -1.41550500 | 0.40109300  |
| H | -0.85416200 | -0.87034000 | -0.07127300 |
| C | -1.21237700 | -2.51422700 | 1.10860700  |
| C | -2.79908600 | -1.55622100 | -1.73387700 |
| C | -4.18896100 | -1.53567800 | -2.43298000 |
| H | -2.15553900 | -0.78450900 | -2.16072300 |
| C | -2.96590600 | -3.99258700 | -1.78650400 |
| C | -1.69909400 | -2.81092000 | -3.44299500 |
| C | -4.19540000 | -2.64543000 | -3.50173500 |
| H | -4.99479200 | -1.71869500 | -1.70966500 |
| H | -4.38105700 | -0.55835400 | -2.88469300 |
| H | -2.35329400 | -4.89462500 | -1.89408400 |
| H | -3.29809700 | -3.96435700 | -0.74590100 |
| C | -4.16646700 | -4.00650600 | -2.78082400 |
| C | -2.91402900 | -2.52273000 | -4.38252800 |
| H | -1.26898600 | -3.79058800 | -3.67776500 |
| H | -0.90022700 | -2.07638600 | -3.57235300 |



|    |             |             |             |
|----|-------------|-------------|-------------|
| H  | -5.08832800 | -2.56276300 | -4.13198300 |
| H  | -4.06466100 | -4.81752600 | -3.51324700 |
| H  | -5.11203800 | -4.16765200 | -2.24884300 |
| H  | -2.97505400 | -3.31366600 | -5.14408700 |
| N  | -2.09061800 | -2.82639700 | -2.02092500 |
| C  | -2.89739700 | -1.20476900 | -5.12294800 |
| C  | -2.04567000 | -0.18372800 | -4.98800400 |
| H  | -3.71627500 | -1.09553500 | -5.83794700 |
| H  | -2.15943300 | 0.72167200  | -5.58014900 |
| H  | -1.20556300 | -0.20371500 | -4.29868100 |
| O  | -2.00169900 | -3.39200700 | 1.47728100  |
| C  | 0.25688800  | -2.59977700 | 1.42201400  |
| C  | 1.04546400  | -1.46488400 | 1.65082800  |
| C  | 0.85030700  | -3.86938100 | 1.43803200  |
| C  | 2.41788600  | -1.59234200 | 1.85569600  |
| H  | 0.59878600  | -0.47620400 | 1.66037600  |
| C  | 2.22238800  | -3.99995200 | 1.62382600  |
| H  | 0.22726500  | -4.74298700 | 1.27696300  |
| C  | 3.00579700  | -2.85655500 | 1.82232500  |
| H  | 3.02686400  | -0.70964500 | 2.00744600  |
| H  | 2.68779900  | -4.98068300 | 1.60159500  |
| C  | 4.48741400  | -3.01737600 | 2.00423800  |
| F  | 5.01441200  | -3.85450900 | 1.07401300  |
| F  | 4.79523000  | -3.55614900 | 3.21187300  |
| F  | 5.15474100  | -1.84737500 | 1.91438500  |
| Br | 2.21562200  | 2.18078200  | 1.80542400  |
| O  | 0.10410300  | 0.06628800  | -1.40140700 |
| C  | 1.36165700  | 4.08953600  | -0.21277300 |
| C  | 1.27215600  | -0.41958000 | -1.40649100 |
| C  | 3.76870900  | -0.08545200 | -1.17658600 |
| C  | 1.86849600  | 2.71190800  | -0.05405300 |
| C  | 2.01466300  | 5.16223700  | 0.41490100  |
| H  | 2.89795300  | 4.96794400  | 1.01567700  |
| C  | 2.10367700  | 1.76458600  | -0.94318100 |
| C  | 1.58573200  | 2.56148500  | -2.83390400 |
| H  | 2.09974500  | 1.91140400  | -3.53583400 |
| H  | 2.10425400  | 3.48340800  | -2.58399700 |
| C  | 4.90071700  | 0.71326600  | -0.91149900 |
| H  | 4.76489300  | 1.77120300  | -0.70489600 |

|   |             |             |             |
|---|-------------|-------------|-------------|
| C | 1.52805700  | -1.82291800 | -1.67111000 |
| H | 0.66172100  | -2.46233800 | -1.81188800 |
| C | 0.23173500  | 2.43827200  | -2.66245200 |
| H | -0.31134700 | 1.66187100  | -3.19008500 |
| C | 2.41826800  | 0.43585700  | -1.13960200 |
| C | 1.54873700  | 6.46474600  | 0.27560600  |
| H | 2.07759400  | 7.27877900  | 0.76500600  |
| C | 3.95067000  | -1.47479800 | -1.43591800 |
| C | 5.25269400  | -2.01476800 | -1.42381400 |
| H | 5.38096000  | -3.07808300 | -1.60733600 |
| C | -0.55357000 | 3.22661700  | -1.66378700 |
| H | -1.46645500 | 3.61331900  | -2.13437300 |
| H | -0.89419900 | 2.48922000  | -0.91868600 |
| C | 6.17263300  | 0.15883000  | -0.90720400 |
| H | 7.03335000  | 0.78832900  | -0.69765700 |
| C | 0.40230500  | 6.73703400  | -0.48425200 |
| C | -0.13632100 | 8.14117900  | -0.60212000 |
| H | -0.80249200 | 8.37485800  | 0.23954300  |
| H | -0.71442800 | 8.27485700  | -1.52277000 |
| H | 0.67075000  | 8.88215300  | -0.59176100 |
| C | 0.20281100  | 4.34417000  | -0.98290900 |
| C | 2.79729600  | -2.31026500 | -1.67305100 |
| H | 2.97069000  | -3.37081400 | -1.84236400 |
| C | 6.35343200  | -1.21188400 | -1.16412500 |
| H | 7.35111700  | -1.64135500 | -1.15134300 |
| C | -0.24612300 | 5.66276900  | -1.10470700 |
| H | -1.13834900 | 5.85514100  | -1.69665800 |

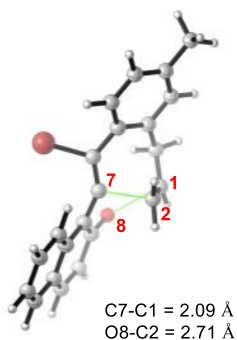

### TS2

|    |             |             |             |
|----|-------------|-------------|-------------|
| Br | 0.28872400  | -1.66783500 | 1.72118600  |
| O  | -1.02579100 | 2.60678300  | 1.20027400  |
| C  | 2.15794200  | -0.28984800 | -0.03773800 |

|   |             |             |             |
|---|-------------|-------------|-------------|
| C | -1.94173900 | 1.88058900  | 0.74676900  |
| C | -2.69250400 | -0.19122500 | -0.51956400 |
| C | 0.72977600  | -0.35260800 | 0.33304800  |
| C | 2.87213700  | -1.46600300 | -0.32193800 |
| H | 2.36267900  | -2.42287300 | -0.26151400 |
| C | -0.30210100 | 0.35023400  | -0.10045500 |
| C | 0.40895500  | 1.67792600  | -1.54598300 |
| H | -0.47970500 | 1.95101900  | -2.10738700 |
| H | 1.01184400  | 0.88839900  | -1.98706100 |
| C | -2.42881400 | -1.40032200 | -1.19917000 |
| H | -1.39940500 | -1.72775800 | -1.31337500 |
| C | -3.34883100 | 2.25619400  | 0.83315300  |
| H | -3.57590000 | 3.18936200  | 1.34116300  |
| C | 0.95080800  | 2.57274500  | -0.65910000 |
| H | 0.45733600  | 3.52090700  | -0.47599300 |
| C | -1.64413600 | 0.62080400  | 0.06349700  |
| C | 4.21484800  | -1.42085800 | -0.67575000 |
| H | 4.74381600  | -2.34486900 | -0.89691500 |
| C | -4.04568900 | 0.22908300  | -0.36837200 |
| C | -5.08173900 | -0.57069900 | -0.89194800 |
| H | -6.11125000 | -0.24263600 | -0.76696000 |
| C | 2.11921500  | 2.25123400  | 0.21888200  |
| H | 2.82875400  | 3.08818500  | 0.21446200  |
| H | 1.70519800  | 2.21463100  | 1.24032100  |
| C | -3.46481700 | -2.16734400 | -1.71228300 |
| H | -3.24099400 | -3.09442300 | -2.23366700 |
| C | 4.89620400  | -0.19636800 | -0.74572700 |
| C | 6.35948600  | -0.15243400 | -1.11039000 |
| H | 6.97147800  | -0.64225800 | -0.34180200 |
| H | 6.71849300  | 0.87614300  | -1.21835600 |
| H | 6.54924000  | -0.67987800 | -2.05336100 |
| C | 2.82862300  | 0.95355500  | -0.09919200 |
| C | -4.32819700 | 1.46819600  | 0.31891300  |
| H | -5.37117400 | 1.76538000  | 0.41229000  |
| C | -4.80076100 | -1.75503000 | -1.55855800 |
| H | -5.60821400 | -2.36187400 | -1.95878800 |
| C | 4.18196500  | 0.97105800  | -0.45696300 |
| H | 4.69502300  | 1.92923100  | -0.50355700 |

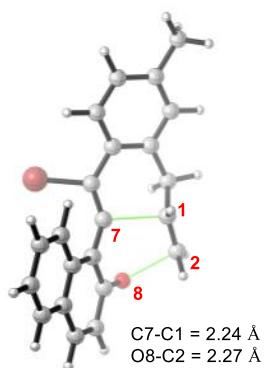

### TS3

|    |             |             |             |
|----|-------------|-------------|-------------|
| Br | 0.26080300  | -1.57895800 | 1.88228900  |
| O  | -1.53935800 | 2.79123000  | 1.14372500  |
| C  | 2.13581100  | -0.23925700 | 0.07896200  |
| C  | -2.25243400 | 1.88518700  | 0.63075000  |
| C  | -2.45029500 | -0.34268800 | -0.54866100 |
| C  | 0.73475500  | -0.21370200 | 0.53633600  |
| C  | 2.82838300  | -1.44687700 | -0.09141500 |
| H  | 2.33835800  | -2.38494100 | 0.14734100  |
| C  | -0.26884400 | 0.56947900  | 0.18651000  |
| C  | -0.11814500 | 3.39713900  | -0.52203100 |
| H  | -0.97347500 | 3.58213500  | -1.16230100 |
| H  | 0.13989000  | 4.18105600  | 0.18096900  |
| C  | -1.90771100 | -1.52611700 | -1.09280600 |
| H  | -0.83678100 | -1.69004900 | -1.05094700 |
| C  | -3.68562100 | 2.04624300  | 0.46538400  |
| H  | -4.12492800 | 2.96348500  | 0.84637600  |
| C  | 0.73144100  | 2.34153700  | -0.75438000 |
| C  | -1.63786000 | 0.66928600  | 0.12216900  |
| C  | 4.13760700  | -1.45951700 | -0.56730500 |
| H  | 4.64868600  | -2.41014500 | -0.69816800 |
| C  | -3.85865600 | -0.13890100 | -0.63286200 |
| C  | -4.66913400 | -1.12339900 | -1.23591400 |
| H  | -5.74234900 | -0.95607200 | -1.28884800 |
| C  | 2.06758200  | 2.28349300  | -0.04133000 |
| H  | 2.70685900  | 3.10047000  | -0.39870900 |
| H  | 1.89511600  | 2.46292400  | 1.02943100  |
| C  | -2.72398700 | -2.47805200 | -1.68683400 |
| H  | -2.28189700 | -3.38076300 | -2.09991700 |
| C  | 4.80126700  | -0.26617200 | -0.87449700 |

|   |             |             |             |
|---|-------------|-------------|-------------|
| C | 6.23132100  | -0.26161600 | -1.35537100 |
| H | 6.91714100  | 0.01941700  | -0.54455600 |
| H | 6.37956200  | 0.46117000  | -2.16628000 |
| H | 6.53710100  | -1.24897000 | -1.71728300 |
| C | 2.78916600  | 0.97315300  | -0.22994700 |
| C | -4.43965500 | 1.07383700  | -0.10866500 |
| H | -5.51737300 | 1.19619500  | -0.19573900 |
| C | -4.11399700 | -2.28207500 | -1.75720000 |
| H | -4.74865600 | -3.03258700 | -2.22016200 |
| C | 4.10267200  | 0.93698600  | -0.69794600 |
| H | 4.59992000  | 1.87682900  | -0.93050900 |
| H | 0.64760400  | 1.80571900  | -1.69830300 |

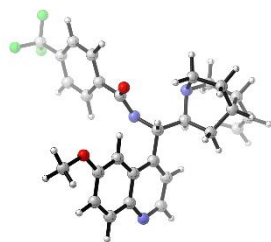

### Cat 6

|   |             |             |             |
|---|-------------|-------------|-------------|
| C | 3.43183000  | 1.53371400  | 2.78828200  |
| C | 2.63589800  | 3.19858400  | 1.42754300  |
| C | 2.01109900  | 2.26134400  | 0.53722400  |
| C | 2.15325400  | 0.86316800  | 0.83997400  |
| C | 2.86007300  | 0.52399200  | 1.97347000  |
| H | 3.00697200  | 5.27756100  | 1.83232000  |
| H | 3.99048700  | 1.24512300  | 3.67806700  |
| C | 2.52440300  | 4.58388100  | 1.14999000  |
| C | 1.29525800  | 2.75372500  | -0.57892900 |
| H | 3.00148500  | -0.51058700 | 2.26551600  |
| C | 1.20324600  | 4.11643700  | -0.82122000 |
| C | 1.82745700  | 5.04399500  | 0.05469000  |
| H | 0.79278600  | 2.08545400  | -1.26944600 |
| H | 1.76097700  | 6.10989500  | -0.12908300 |
| N | 3.33779300  | 2.82296900  | 2.53991100  |
| O | 0.49372300  | 4.47890400  | -1.92361200 |
| C | 0.37277100  | 5.86415900  | -2.24073400 |
| H | 1.35220400  | 6.32611800  | -2.42009900 |
| H | -0.21581600 | 5.90766800  | -3.15956900 |

|   |             |             |             |
|---|-------------|-------------|-------------|
| H | -0.15290400 | 6.41623400  | -1.45094500 |
| C | 1.48573500  | -0.17334700 | -0.05838200 |
| H | 1.59828000  | 0.14991000  | -1.09413800 |
| N | 0.04856200  | -0.16853800 | 0.20617100  |
| H | -0.23926500 | -0.53611500 | 1.10413900  |
| C | -0.87961400 | -0.06811800 | -0.78222000 |
| C | 2.07603400  | -1.59389100 | 0.06136200  |
| C | 3.57849600  | -1.64035400 | -0.35036700 |
| H | 1.97554000  | -1.91370600 | 1.10494500  |
| C | 1.53913600  | -2.44890600 | -2.16485600 |
| C | 1.69834300  | -3.92655200 | -0.28309600 |
| C | 3.80056500  | -2.91052400 | -1.19329900 |
| H | 3.84721900  | -0.75723300 | -0.94473200 |
| H | 4.22230400  | -1.63792200 | 0.53352500  |
| H | 0.86134400  | -3.14278400 | -2.67442100 |
| H | 1.24697600  | -1.44371600 | -2.47708900 |
| C | 3.02578500  | -2.75877100 | -2.51473900 |
| C | 3.23994000  | -4.14888900 | -0.42912000 |
| H | 1.15636900  | -4.64988700 | -0.90137400 |
| H | 1.36067700  | -4.07571600 | 0.74693600  |
| H | 4.86984700  | -3.05015900 | -1.38990800 |
| H | 3.10934100  | -3.68004500 | -3.10479300 |
| H | 3.46427100  | -1.95034100 | -3.11258600 |
| H | 3.41384400  | -5.02245400 | -1.07382100 |
| N | 1.28765400  | -2.57712700 | -0.71363300 |
| C | 4.02167000  | -4.38565800 | 0.84177400  |
| C | 3.61101600  | -4.28881500 | 2.10908600  |
| H | 5.06882100  | -4.64180800 | 0.66454900  |
| H | 4.29635800  | -4.47155900 | 2.93373800  |
| H | 2.59045000  | -4.03648500 | 2.38527000  |
| O | -0.59022100 | 0.17270100  | -1.95893000 |
| C | -2.31404500 | -0.23944900 | -0.36142100 |
| C | -2.76786600 | 0.03672800  | 0.93668200  |
| C | -3.22735300 | -0.66716200 | -1.33388500 |
| C | -4.11230800 | -0.12912100 | 1.26091800  |
| H | -2.08405900 | 0.40887700  | 1.69356500  |
| C | -4.57015300 | -0.84318000 | -1.01251800 |
| H | -2.87028100 | -0.86083100 | -2.33970600 |
| C | -5.00984200 | -0.57622400 | 0.28726500  |

|   |             |             |             |
|---|-------------|-------------|-------------|
| H | -4.46214600 | 0.08901300  | 2.26486600  |
| H | -5.27190300 | -1.18812000 | -1.76452400 |
| C | -6.46713100 | -0.70179000 | 0.63237200  |
| F | -7.11292700 | -1.57379700 | -0.17429400 |
| F | -7.11397900 | 0.48561900  | 0.52020800  |
| F | -6.65069900 | -1.12006800 | 1.90707600  |

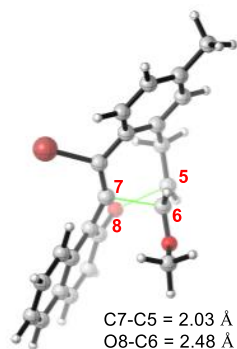

#### OMe-TS2

|    |             |             |             |
|----|-------------|-------------|-------------|
| Br | 0.42836000  | 2.35337200  | -1.23070500 |
| O  | -0.88520400 | -1.99667900 | -2.02577300 |
| C  | 2.23774500  | 0.42317500  | 0.00262100  |
| C  | -1.82651000 | -1.42389200 | -1.40893100 |
| C  | -2.61357200 | 0.29224600  | 0.26729500  |
| C  | 0.82204000  | 0.64090200  | -0.34958500 |
| C  | 2.98252200  | 1.40851500  | 0.67112200  |
| H  | 2.50836700  | 2.35383700  | 0.91704100  |
| C  | -0.20151200 | -0.18012500 | -0.19023400 |
| C  | 0.39252400  | -1.88677800 | 0.73748100  |
| H  | 1.03133700  | -1.32494700 | 1.41903300  |
| C  | -2.37420000 | 1.33552300  | 1.19151900  |
| H  | -1.35221100 | 1.65623700  | 1.36980300  |
| C  | -3.21710300 | -1.81923700 | -1.57339600 |
| H  | -3.42132700 | -2.62663400 | -2.27109700 |
| C  | 0.93496600  | -2.46427900 | -0.40090900 |
| H  | 0.48737100  | -3.36384800 | -0.80249800 |
| C  | -1.55144600 | -0.35756400 | -0.46310900 |
| C  | 4.30983300  | 1.18880100  | 1.01917200  |
| H  | 4.86370400  | 1.96462400  | 1.54250600  |
| C  | -3.95935600 | -0.11485700 | 0.02743900  |
| C  | -5.01033600 | 0.53206500  | 0.71173600  |
| H  | -6.03315000 | 0.21607400  | 0.51858400  |
| C  | 2.12275600  | -1.88378800 | -1.09512200 |
| H  | 2.81149300  | -2.69410400 | -1.36340800 |
| H  | 1.74207300  | -1.48306800 | -2.04899500 |

|   |             |             |             |
|---|-------------|-------------|-------------|
| C | -3.42371800 | 1.94977900  | 1.85718300  |
| H | -3.21854900 | 2.74989400  | 2.56375600  |
| C | 4.94359100  | -0.02216600 | 0.70150200  |
| C | 6.39183700  | -0.24799300 | 1.05950600  |
| H | 7.05005500  | 0.38340300  | 0.44800400  |
| H | 6.68995000  | -1.28962400 | 0.90162600  |
| H | 6.58696500  | 0.00770400  | 2.10799900  |
| C | 2.86249000  | -0.79961700 | -0.33473900 |
| C | -4.21680800 | -1.18219300 | -0.90721200 |
| H | -5.25295400 | -1.47537300 | -1.06600500 |
| C | -4.75232200 | 1.54954100  | 1.61779400  |
| H | -5.57087600 | 2.03845600  | 2.13879700  |
| C | 4.19971300  | -0.99728800 | 0.02825400  |
| H | 4.67653000  | -1.93946500 | -0.23326300 |
| O | -0.69158100 | -2.49665900 | 1.28291800  |
| C | -1.10418900 | -1.95721900 | 2.54330100  |
| H | -1.27990800 | -0.87791500 | 2.47774300  |
| H | -2.03882600 | -2.45733300 | 2.80441800  |
| H | -0.35202600 | -2.16055100 | 3.31735300  |

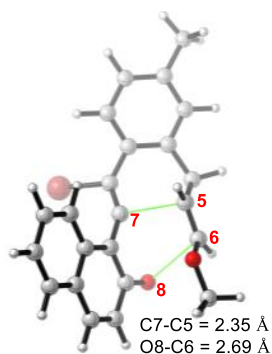

#### OMe-TS3

|    |             |             |             |
|----|-------------|-------------|-------------|
| Br | -0.74218600 | -2.14861300 | -1.65862900 |
| O  | 1.59308600  | 1.83733000  | -1.96851600 |
| C  | -2.35449200 | -0.26608400 | -0.08413000 |
| C  | 2.21948900  | 1.03937200  | -1.23913600 |
| C  | 2.26330700  | -0.76613700 | 0.55926400  |
| C  | -0.97602700 | -0.52080200 | -0.55121800 |
| C  | -3.22067800 | -1.32853400 | 0.21591100  |
| H  | -2.88419900 | -2.35004500 | 0.07683600  |
| C  | 0.15480200  | 0.11989500  | -0.34991600 |
| C  | 0.42615700  | 2.97411900  | 0.17051500  |
| H  | 0.38665700  | 3.63934400  | -0.68782200 |
| C  | 1.63123700  | -1.65469500 | 1.45239800  |
| H  | 0.54718900  | -1.68081700 | 1.49779900  |
| C  | 3.67871200  | 1.00625200  | -1.20859600 |
| H  | 4.19466500  | 1.68458500  | -1.88213900 |



|   |             |             |             |
|---|-------------|-------------|-------------|
| C | -0.61048800 | 2.16040500  | 0.51814900  |
| C | 1.51773700  | 0.10765600  | -0.34460000 |
| C | -4.51019200 | -1.09869300 | 0.69108200  |
| H | -5.15246200 | -1.94553300 | 0.91994600  |
| C | 3.68570400  | -0.73921800 | 0.51858300  |
| C | 4.42235700  | -1.59723800 | 1.35918300  |
| H | 5.50868600  | -1.56813400 | 1.31498400  |
| C | -1.93204200 | 2.24087800  | -0.20719600 |
| H | -2.46736000 | 3.16035400  | 0.06237700  |
| H | -1.74015800 | 2.29102900  | -1.28816300 |
| C | 2.37636300  | -2.48995400 | 2.27478200  |
| H | 1.86647600  | -3.16605100 | 2.95601700  |
| C | -4.98434700 | 0.20359200  | 0.87490600  |
| C | -6.37669100 | 0.47772900  | 1.38728500  |
| H | -6.94622400 | 1.09378700  | 0.67988700  |
| H | -6.34830100 | 1.02684000  | 2.33728700  |
| H | -6.93472500 | -0.44972700 | 1.55178500  |
| C | -2.81982800 | 1.05745500  | 0.09914900  |
| C | 4.35617000  | 0.16581600  | -0.38794100 |
| H | 5.44460500  | 0.15817800  | -0.39159200 |
| C | 3.77992900  | -2.46607300 | 2.23045900  |
| H | 4.35860300  | -3.12280900 | 2.87407400  |
| C | -4.11695800 | 1.26213400  | 0.56999600  |
| H | -4.46483500 | 2.28475600  | 0.70386800  |
| H | -0.57777600 | 1.67805700  | 1.49193100  |
| O | 1.57274300  | 2.91959300  | 0.85325400  |
| C | 2.60118600  | 3.82602900  | 0.41728800  |
| H | 2.34606300  | 4.85166200  | 0.70799800  |
| H | 3.51780000  | 3.51527800  | 0.91986300  |
| H | 2.72676800  | 3.76192200  | -0.66811800 |

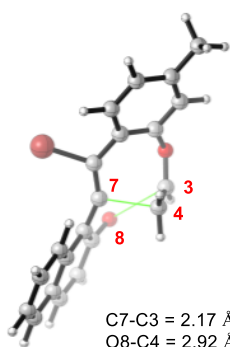

#### O-TS2

|    |             |             |            |
|----|-------------|-------------|------------|
| Br | 0.33193300  | -1.59755000 | 1.84853100 |
| O  | -1.18336700 | 2.60709400  | 1.31243900 |
| C  | 2.12891400  | -0.25721400 | 0.00214100 |

|   |             |             |             |
|---|-------------|-------------|-------------|
| C | -2.04707000 | 1.84690100  | 0.82757500  |
| C | -2.68077800 | -0.20436700 | -0.54856600 |
| C | 0.71724900  | -0.30507300 | 0.42608100  |
| C | 2.86996200  | -1.43439400 | -0.20921100 |
| H | 2.38407000  | -2.39195300 | -0.05294900 |
| C | -0.33729000 | 0.36353700  | -0.00305300 |
| C | 0.44031300  | 1.71173600  | -1.51840400 |
| H | -0.47122300 | 2.08713100  | -1.96716500 |
| H | 0.96909500  | 0.93173500  | -2.05572900 |
| C | -2.35179100 | -1.36116300 | -1.28673100 |
| H | -1.30882500 | -1.64976300 | -1.38220600 |
| C | -3.47552900 | 2.14701800  | 0.89957400  |
| H | -3.75642600 | 3.04385400  | 1.44474000  |
| C | 1.05045700  | 2.49178300  | -0.57894300 |
| H | 0.61562900  | 3.40202200  | -0.18761300 |
| C | -1.68071200 | 0.61136900  | 0.11962300  |
| C | 4.19951900  | -1.39509500 | -0.60864600 |
| H | 4.73612100  | -2.32655500 | -0.76930900 |
| C | -4.05221100 | 0.16096200  | -0.42892900 |
| C | -5.03939100 | -0.63698500 | -1.04039400 |
| H | -6.08320000 | -0.34872300 | -0.93808700 |
| C | -3.34062300 | -2.12828700 | -1.88759100 |
| H | -3.06378800 | -3.01337900 | -2.45449200 |
| C | 4.86192500  | -0.17225800 | -0.80396300 |
| C | 6.30757600  | -0.13970600 | -1.23032200 |
| H | 6.94548300  | -0.64041300 | -0.49127900 |
| H | 6.67044100  | 0.88562200  | -1.35113600 |
| H | 6.44755000  | -0.66505600 | -2.18324900 |
| C | 2.80522700  | 0.95938900  | -0.20029100 |
| C | -4.40492700 | 1.34895200  | 0.31572700  |
| H | -5.46179900 | 1.59889000  | 0.39147500  |
| C | -4.69410400 | -1.76970200 | -1.76499100 |
| H | -5.46452400 | -2.37536900 | -2.23394800 |
| C | 4.14103400  | 1.00524900  | -0.59102500 |
| H | 4.60680400  | 1.97718500  | -0.72231600 |
| O | 2.19717200  | 2.18579200  | 0.05214800  |

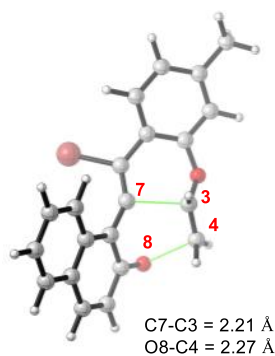

O-TS3

|    |             |             |             |
|----|-------------|-------------|-------------|
| Br | 0.26446900  | -1.78877300 | 1.67717500  |
| O  | -1.35148100 | 2.70206700  | 1.31214600  |
| C  | 2.12968500  | -0.28824900 | 0.00201900  |
| C  | -2.14739900 | 1.87398100  | 0.78674100  |
| C  | -2.53273100 | -0.25441500 | -0.52229400 |
| C  | 0.72735800  | -0.32532700 | 0.44182300  |
| C  | 2.92221600  | -1.44010600 | -0.12853000 |
| H  | 2.48462100  | -2.40895600 | 0.08565000  |
| C  | -0.27003300 | 0.49195700  | 0.16287600  |
| C  | 0.04361200  | 3.30094000  | -0.38083800 |
| H  | -0.83471400 | 3.53622100  | -0.96646600 |
| H  | 0.41354300  | 4.04243600  | 0.31542500  |
| C  | -2.08493900 | -1.42764800 | -1.16600600 |
| H  | -1.02467900 | -1.65510000 | -1.18119400 |
| C  | -3.57321900 | 2.12965400  | 0.70007600  |
| H  | -3.93922000 | 3.04364800  | 1.15835600  |
| C  | 0.80501300  | 2.20773500  | -0.71064300 |
| C  | -1.63391000 | 0.65915500  | 0.17403100  |
| C  | 4.25550500  | -1.36308900 | -0.51974400 |
| H  | 4.83500000  | -2.27739600 | -0.61588300 |
| C  | -3.92839300 | 0.03570700  | -0.52544200 |
| C  | -4.82137000 | -0.85817300 | -1.15264300 |
| H  | -5.88406300 | -0.62764000 | -1.14457600 |
| C  | -2.98145400 | -2.28866700 | -1.78213000 |
| H  | -2.61332500 | -3.18570600 | -2.27271000 |
| C  | 4.86214800  | -0.12598300 | -0.78003900 |
| C  | 6.31968800  | -0.03253800 | -1.15580400 |
| H  | 6.94249200  | 0.11921000  | -0.26377300 |
| H  | 6.50831600  | 0.81033200  | -1.82961200 |
| H  | 6.66658100  | -0.94901100 | -1.64501600 |
| C  | 2.74263100  | 0.94699400  | -0.28252000 |
| C  | -4.41040600 | 1.24224300  | 0.10277900  |
| H  | -5.48139500 | 1.43245200  | 0.07652600  |

|   |             |             |             |
|---|-------------|-------------|-------------|
| C | -4.35900800 | -2.00815000 | -1.77420400 |
| H | -5.05701900 | -2.68782400 | -2.25496700 |
| C | 4.07913600  | 1.02806200  | -0.66120300 |
| H | 4.49849100  | 2.01066200  | -0.85740100 |
| H | 0.69919500  | 1.70803200  | -1.67188400 |
| O | 2.05960300  | 2.13183500  | -0.13757800 |

## IX. Gram-scale preparation and transformations

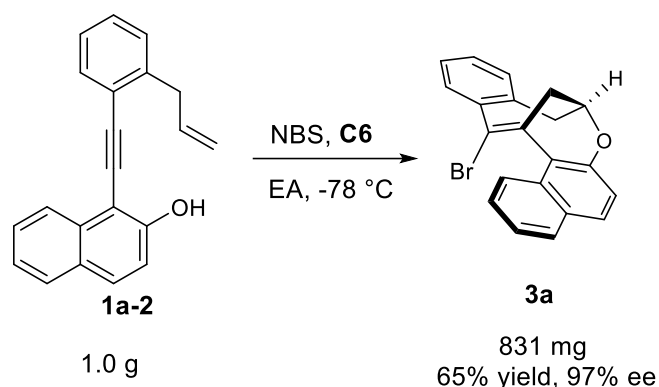

A solution of **1a-2** (1.0 g, 3.52 mmol, 1.0 equiv.) and **C6** (10 mol%) in EA (0.0125M) was stirred at -78 °C for 30 min, then NBS (660 mg, 3.70 mmol, 1.05 equiv.) was added in 10 portions. After stirring at -78 °C for 12 h, the reaction mixture was concentrated under reduced pressure. The resulting residue was purified by silica gel flash column chromatography using PE/EA eluent (30:1 to 15:1) to afford the product **3a** (831 mg, 65% yield) as a pale yellow solid.

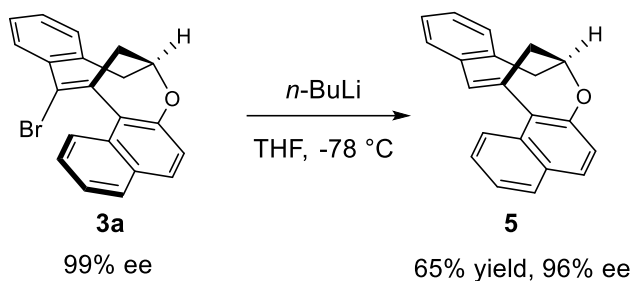

**3a** (73 mg, 0.2 mmol, 1.0 equiv.) was dissolved in freshly distilled THF (2mL) at room temperature under nitrogen atmosphere. The solution was cooled to -78 °C. Titrated *n*-BuLi (0.25 mmol, 1.25 equiv.) was added dropwise. After stirred for 30 min at -78 °C, the reaction was allowed to warm to room temperature. Solvent was removed under reduced pressure. The product was then dried under vacuum and flash chromatography on a silica column (PE: EA = 20:1) to afford compound **5** as a yellow oil in 65% yield.

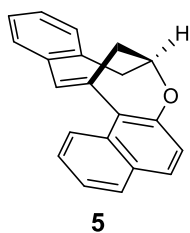

### 8,9-dihydro-8,15-methanobenzo[f]naphtho[2,1-b]oxonine(**5**)

Yellow oil. ( $R_f$  = 0.6, PE/EA = 20:1)

**<sup>1</sup>H NMR** (600 MHz, CDCl<sub>3</sub>)  $\delta$  8.19 (d,  $J$  = 8.2 Hz, 1H), 7.79 (d,  $J$  = 7.8 Hz, 1H), 7.64 (d,  $J$  = 8.8 Hz, 1H), 7.52 (t,  $J$  = 7.0 Hz, 1H), 7.39 – 7.33 (m, 2H), 7.31 (t,  $J$  = 6.4 Hz, 1H), 7.20 – 7.16 (m, 2H), 7.09 (d,  $J$  = 8.8 Hz, 1H), 6.76 (s, 1H), 5.54 – 5.40 (m, 1H), 3.18 (dd,  $J$  = 14.2, 6.3 Hz, 1H), 3.10 (dd,  $J$  = 14.1, 8.3 Hz, 1H), 2.97 (d,  $J$  = 11.5 Hz, 1H), 2.47 (d,  $J$  = 11.6 Hz, 1H).

**<sup>13</sup>C NMR** (150 MHz, CDCl<sub>3</sub>)  $\delta$  151.28, 139.53, 137.72, 137.49, 129.81, 129.63, 128.63, 128.28, 128.20, 127.82, 127.33, 127.26, 126.44, 125.69, 123.68, 123.43, 121.86, 118.41, 85.99, 40.97, 32.66.

**HRMS (APCI)**  $m/z$  Calcd for C<sub>21</sub>H<sub>17</sub>O<sup>+</sup>[M + H]<sup>+</sup>: 285.1274, Found: 285.1265.

**Optical Rotation:**  $[\alpha]_D^{25} = -126.4^\circ$  ( $c = 0.5$ , acetone).

**HPLC analysis:** Chiralcel AD-H (Hexane/*i*-PrOH = 98:2, flow rate = 1.0 mL/min, wave length = 254 nm),  $t_R = 5.213$ min (major),  $t_R = 5.934$  min (minor), 96% ee.

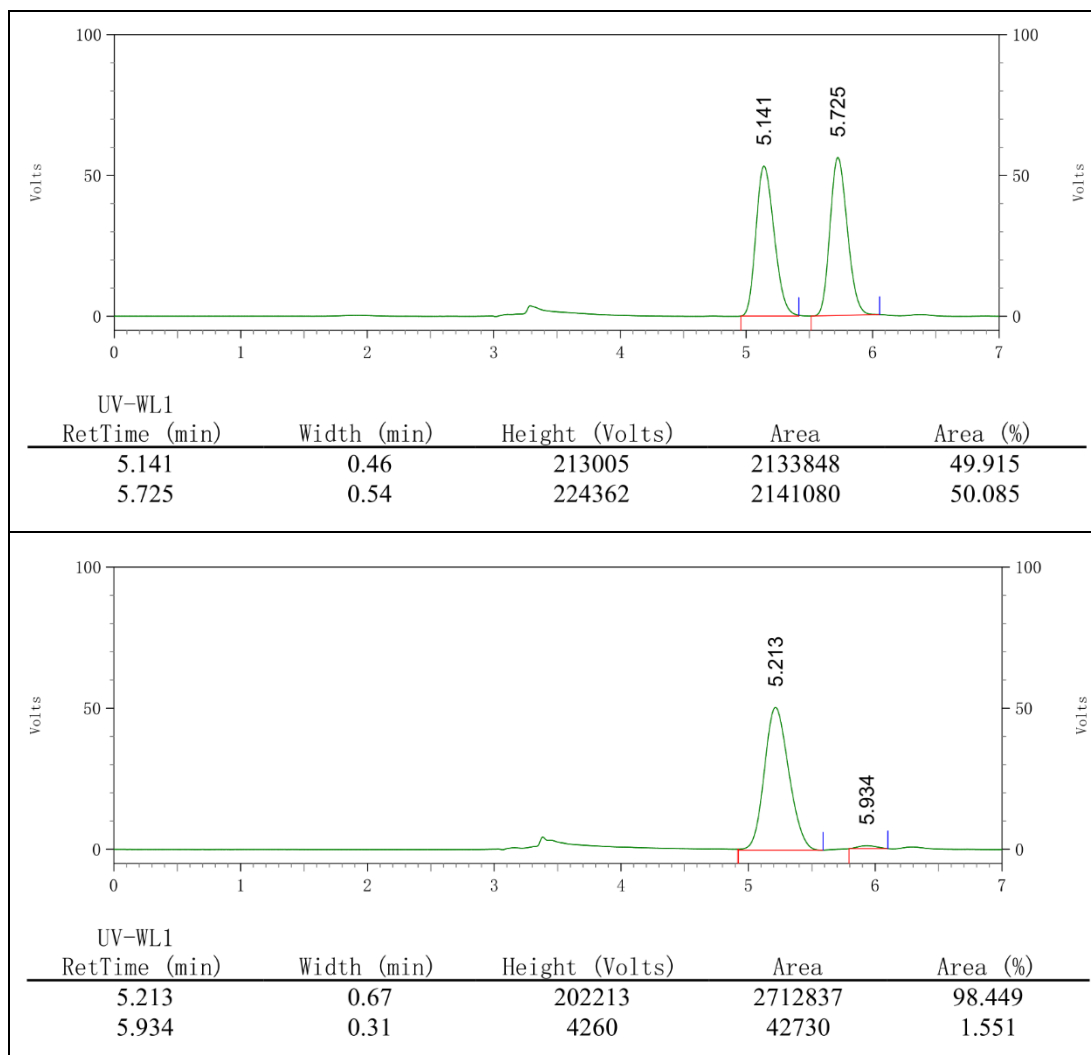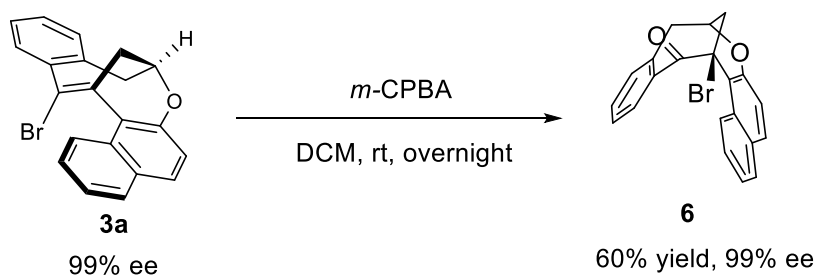

**3a** (73 mg, 0.2 mmol, 1.0 equiv.) and *m*-CPBA (138 mg, 0.8 mmol, 4 equiv.) was dissolved in DCM (4 mL). The mixture was stirred overnight at room temperature. Removal of solvent under reduced pressure, purified by flash chromatography on silica gel (PE/EA = 5:1) to afford the product **6** (45.5 mg, 0.12 mmol, 60% yield) as a white solid.

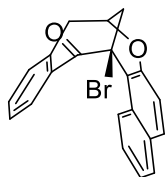

6

White solid. ( $R_f = 0.4$ , PE/EA = 5:1)

$^1\text{H NMR}$  (400 MHz,  $\text{CDCl}_3$ )  $\delta$  8.16 (d,  $J = 8.6$  Hz, 1H), 7.60 (dd,  $J = 8.0, 1.4$  Hz, 1H), 7.55 (d,  $J = 9.0$  Hz, 1H), 7.52 – 7.47 (m, 1H), 7.32 – 7.27 (m, 1H), 7.21 (dd,  $J = 7.6, 1.5$  Hz, 1H), 7.07 (td,  $J = 7.5, 1.4$  Hz, 1H), 7.00 (d,  $J = 7.5$  Hz, 1H), 6.95 – 6.84 (m, 2H), 4.87 – 4.81 (m, 1H), 3.65 – 3.57 (m, 1H), 3.36 – 3.29 (m, 1H), 3.27 – 3.18 (m, 2H).

$^{13}\text{C NMR}$  (101 MHz,  $\text{CDCl}_3$ )  $\delta$  199.59, 151.79, 136.97, 132.59, 131.99, 131.58, 131.10, 130.05, 129.37, 128.81, 128.41, 126.90, 126.03, 125.29, 123.72, 118.84, 114.02, 71.42, 65.39, 43.45, 40.98.

**HRMS (ESI)**  $m/z$  Calcd for  $\text{C}_{21}\text{H}_{15}\text{BrNaO}_2^+[\text{M} + \text{Na}]^+$ : 401.0148, Found: 401.0148.

**Optical Rotation:**  $[\alpha]_{\text{D}}^{25} = +34.6^\circ$  ( $c = 0.5$ , acetone).

**HPLC analysis:** Chiralcel AD-H (Hexane/*i*-PrOH = 80:20, flow rate = 1.0 mL/min, wave length = 254 nm),  $t_{\text{R}} = 8.899$  min (major),  $t_{\text{R}} = 10.046$  min (minor), 99% ee.

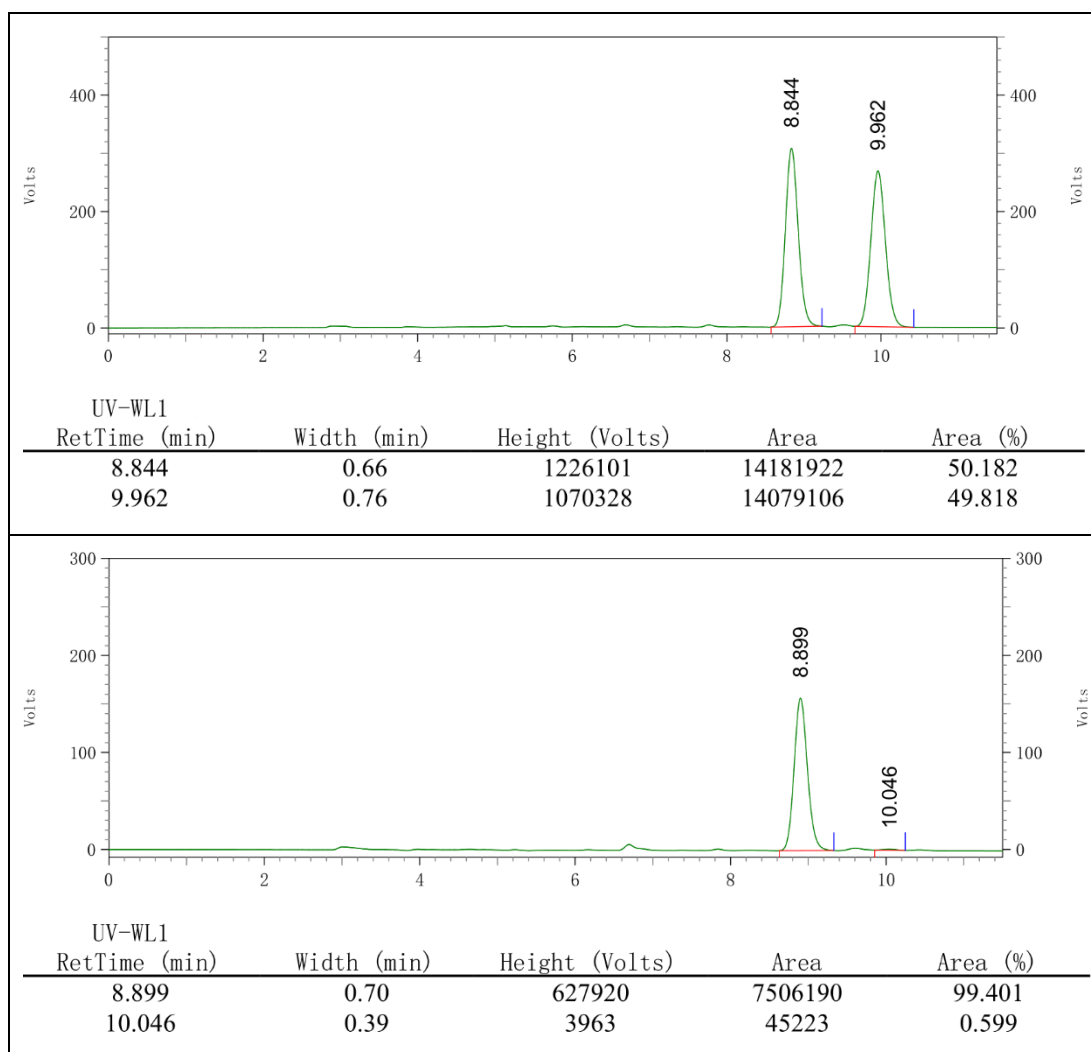

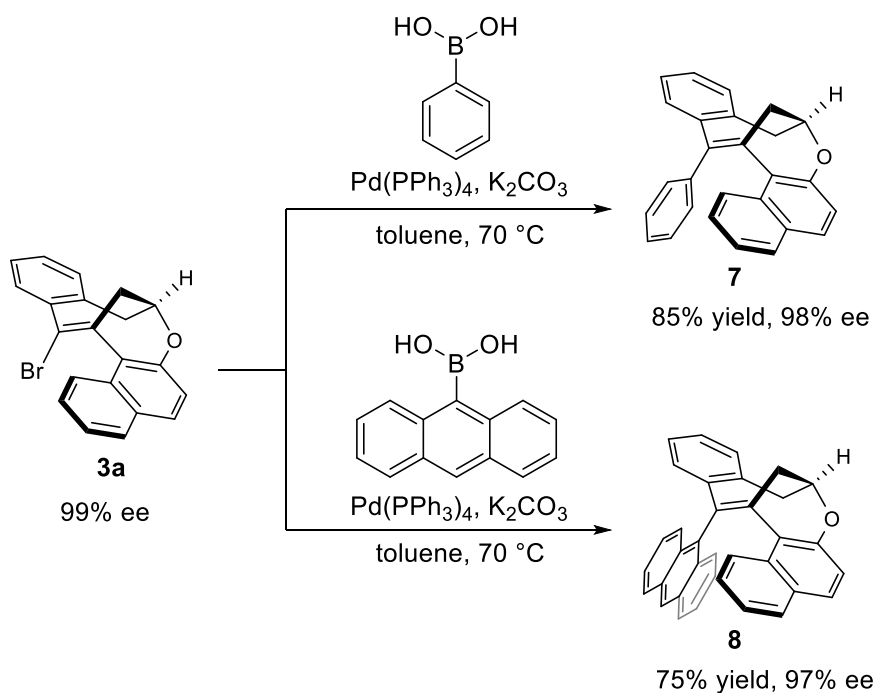

$\text{Pd(PPh}_3)_4$  (12 mg, 0.01 mmol, 0.05 equiv.),  $\text{K}_2\text{CO}_3$  (138 mg, 1 mmol, 5.0 equiv.), **3a** (73 mg, 0.2 mmol, 1.0 equiv.) and the boronic acid (0.24 mmol, 1.2 equiv.) was dissolved in THF (2 mL) and  $\text{H}_2\text{O}$  (0.5 mL) under nitrogen atmosphere. The mixture was stirred for 4 hours at  $70^\circ\text{C}$ . Then the mixture was filtered through a pad of celite and washed with EA. Removal of solvent under reduced pressure, purified by flash chromatography on silica gel (PE/EA = 20:1) to afford the product.

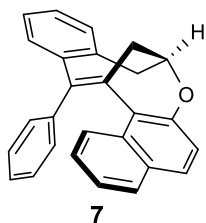

**(S)-14-phenyl-8,9-dihydro-8,15-methanobenzo[f]naphtho[2,1-b]oxonine(7)**

White solid. ( $R_f$  = 0.5, PE/EA = 15:1)

$^1\text{H NMR}$  (400 MHz,  $\text{CDCl}_3$ )  $\delta$  7.69 – 7.54 (m, 3H), 7.51 (d,  $J$  = 8.4 Hz, 1H), 7.29 (t,  $J$  = 7.4 Hz, 1H), 7.22 – 7.13 (m, 4H), 7.09 (t,  $J$  = 10.2 Hz, 2H), 7.05 – 6.90 (m, 4H), 5.51 – 5.42 (m, 1H), 3.38 (dd,  $J$  = 14.4, 6.3 Hz, 1H), 3.25 (dd,  $J$  = 14.4, 8.1 Hz, 1H), 2.94 (d,  $J$  = 11.9 Hz, 1H), 2.49 (d,  $J$  = 11.5 Hz, 1H).

$^{13}\text{C NMR}$  (100 MHz,  $\text{CDCl}_3$ )  $\delta$  152.19, 142.50, 141.10, 136.68, 134.75, 132.04, 129.55, 128.85, 128.76, 128.41, 128.13, 127.99, 127.79, 127.48, 127.29, 126.49, 125.41, 125.08, 122.86, 121.23, 118.11, 84.83, 41.53, 34.27.

**HRMS (ESI)**  $m/z$  Calcd for  $\text{C}_{27}\text{H}_{21}\text{O}^+[\text{M} + \text{H}]^+$ : 361.1587, Found: 361.1595.

**Optical Rotation:**  $[\alpha]_{\text{D}}^{25} = -176.6^\circ$  ( $c$  = 0.5, acetone).

**HPLC analysis:** Chiralcel AD-H (Hexane/*i*-PrOH = 98:2, flow rate = 1.0 mL/min, wave length = 254 nm),  $t_{\text{R}}$  = 8.421 min (minor),  $t_{\text{R}}$  = 9.627 min (major), 98% ee.



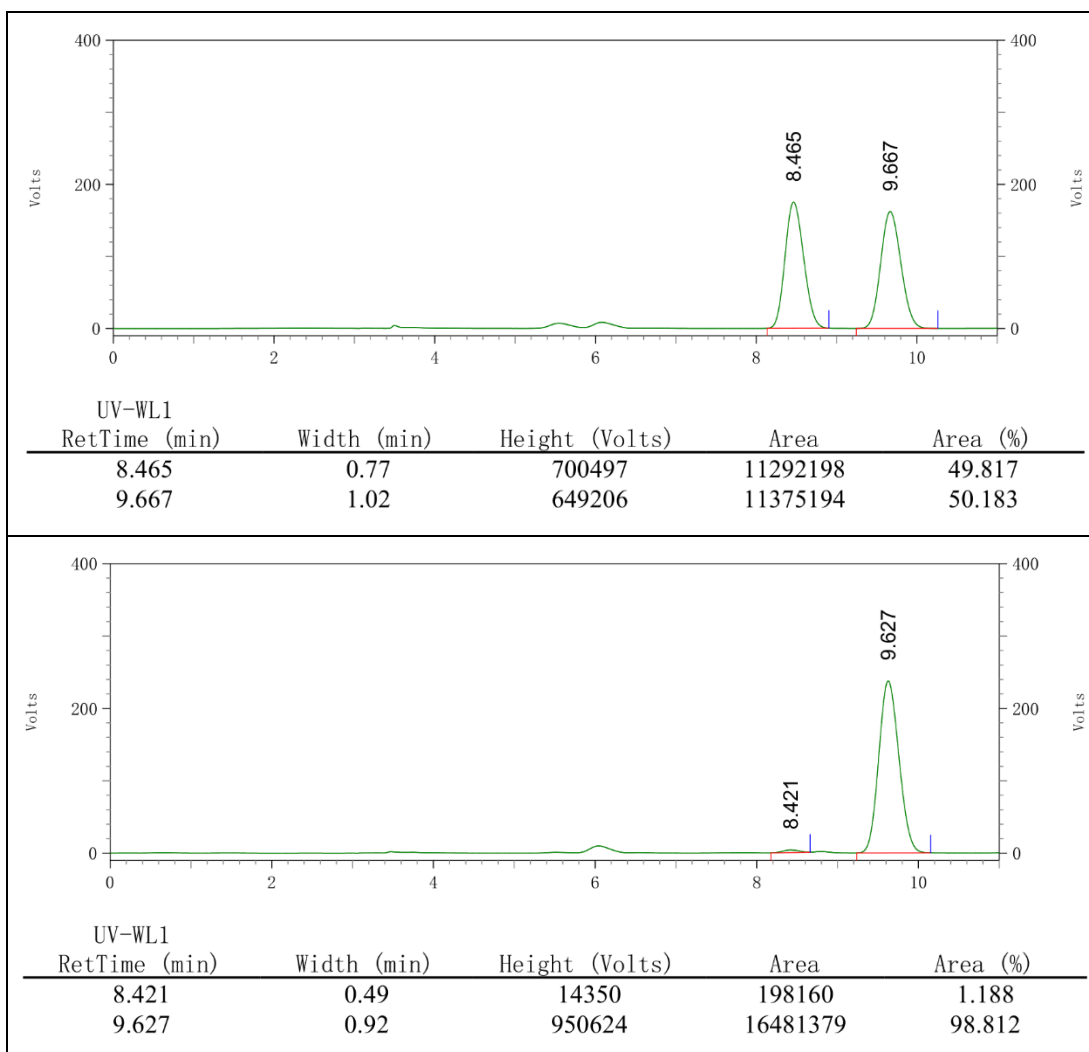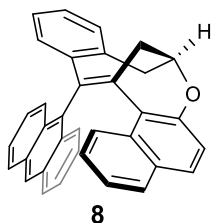

**(S)-14-(anthracen-9-yl)-8,9-dihydro-8,15-methanobenzo[f]naphtho[2,1-b]oxonine(8)**

White solid. ( $R_f = 0.5$ , PE/EA = 15:1)

$^1\text{H NMR}$  (400 MHz,  $\text{CDCl}_3$ )  $\delta$  8.88 (d,  $J = 8.7$  Hz, 1H), 8.19 (s, 1H), 8.01 (d,  $J = 8.5$  Hz, 1H), 7.79 – 7.71 (m, 1H), 7.70 – 7.49 (m, 3H), 7.42 – 7.29 (m, 2H), 7.23 (t, 2H), 7.19 – 6.88 (m, 6H), 6.71 (t,  $J = 7.4$  Hz, 1H), 6.20 (t,  $J = 7.6$  Hz, 1H), 5.80 – 5.70 (m, 1H), 3.96 (dd,  $J = 15.8, 4.8$  Hz, 1H), 3.61 (dd,  $J = 15.9, 8.9$  Hz, 1H), 3.45 (d,  $J = 11.3$  Hz, 1H), 2.81 (dd,  $J = 11.5, 4.6$  Hz, 1H).

$^{13}\text{C NMR}$  (100 MHz,  $\text{CDCl}_3$ )  $\delta$  152.40, 141.76, 138.16, 136.31, 135.94, 134.02, 131.72, 131.62, 131.27, 130.64, 129.85, 128.89, 128.80, 128.67, 128.24, 128.13, 127.82, 127.52, 127.10, 126.88, 126.68, 126.00, 125.70, 125.35, 125.01, 124.79, 124.65, 124.00, 123.66, 122.50, 117.82, 86.68, 44.06, 35.39.

**HRMS (ESI)**  $m/z$  Calcd for  $\text{C}_{35}\text{H}_{24}\text{NaO}^+$  [ $\text{M} + \text{Na}$ ] $^+$ : 483.1719, Found: 483.1743.

**Optical Rotation:**  $[\alpha]_D^{25} = -307.3^\circ$  ( $c = 0.3$ , DCM).

**HPLC analysis:** Chiralcel IA-H (Hexane/*i*-PrOH = 98:2, flow rate = 1.0 mL/min, wave length = 254 nm),  $t_R$  = 6.962 min (minor),  $t_R$  = 8.522 min (major), 97% ee.

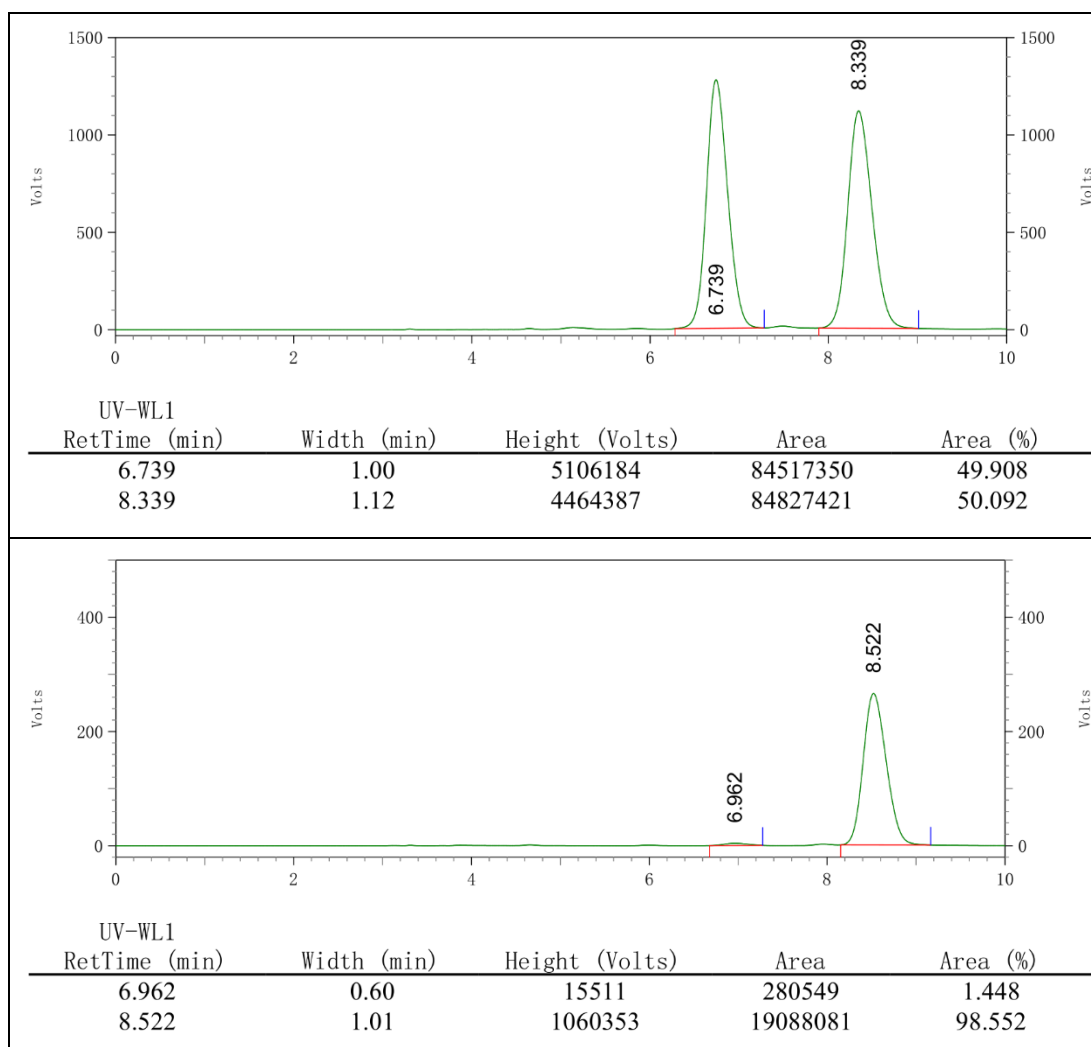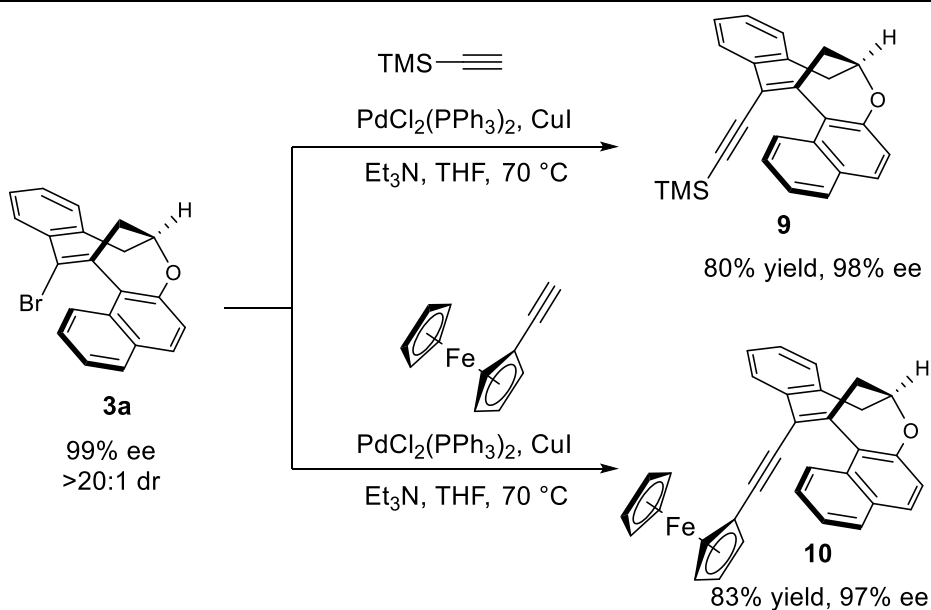

$\text{PdCl}_2(\text{PPh}_3)_2$  (7 mg, 0.01 mmol, 0.05 equiv.),  $\text{CuI}$  (4 mg, 0.02 mmol, 0.1 equiv.), and **3a** (73 mg, 0.2 mmol, 1.0 equiv.) were weighed and added into a schlenk tube, evacuated and backfilled with nitrogen (3 times). THF (1.0 mL) and  $\text{Et}_3\text{N}$

(1.0 mL) were injected into the flask. Then, the mixture was stirred for 2h at 70 °C. After that, the alkyne (0.22 mmol, 1.1 equiv.) dissolved in THF (1.0 mL) was added. The resulting mixture kept stirring for 4 h at 70 °C. Then the mixture was filtered through a pad of celite. Removal of the solvent under reduced pressure afforded a residue which is purified by chromatography on silica gel (PE/EA = 20:1) to afford the product.

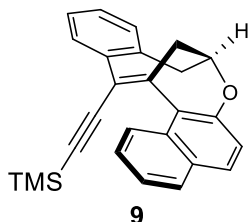

**(S)-((8,9-dihydro-8,15-methanobenzof[naphtho[2,1-b]oxonin-14-yl)ethynyl)trimethylsilane (9)**

Yellow solid. ( $R_f$  = 0.6, PE/EA = 15:1)

**$^1\text{H NMR}$**  (600 MHz,  $\text{CDCl}_3$ )  $\delta$  8.11 (d,  $J$  = 8.4 Hz, 1H), 7.76 (d,  $J$  = 8.1 Hz, 1H), 7.70 (d,  $J$  = 8.9 Hz, 1H), 7.59 (d,  $J$  = 7.6 Hz, 1H), 7.48 (t,  $J$  = 7.6 Hz, 1H), 7.42 – 7.31 (m, 2H), 7.27 – 7.22 (m, 1H), 7.17 (d,  $J$  = 7.6 Hz, 1H), 7.09 (d,  $J$  = 8.9 Hz, 1H), 5.45 – 5.37 (m, 1H), 3.23 (dd,  $J$  = 14.6, 6.5 Hz, 1H), 3.15 (dd,  $J$  = 14.5, 8.3 Hz, 1H), 2.87 (d,  $J$  = 11.8 Hz, 1H), 2.57 (dd,  $J$  = 11.9, 3.7 Hz, 1H), -0.13 (s, 9H).

**$^{13}\text{C NMR}$**  (150 MHz,  $\text{CDCl}_3$ )  $\delta$  151.80, 142.24, 140.16, 137.00, 129.40, 129.36, 129.00, 128.93, 128.41, 128.03, 127.66, 127.60, 127.28, 125.26, 123.27, 122.10, 118.37, 117.97, 103.93, 100.57, 84.67, 40.46, 34.10, -0.37.

**HRMS (ESI)**  $m/z$  Calcd for  $\text{C}_{26}\text{H}_{25}\text{OSi}^+[\text{M} + \text{H}]^+$ : 381.1669, Found: 381.1676.

**Optical Rotation:**  $[\alpha]_{\text{D}}^{25} = -146.0^\circ$  ( $c$  = 1.0, acetone).

**HPLC analysis:** Chiralcel IB-H (Hexane/*i*-PrOH = 98:2, flow rate = 1.0 mL/min, wave length = 254 nm),  $t_{\text{R}}$  = 4.970 min (minor),  $t_{\text{R}}$  = 5.742 min (major), 98% ee.

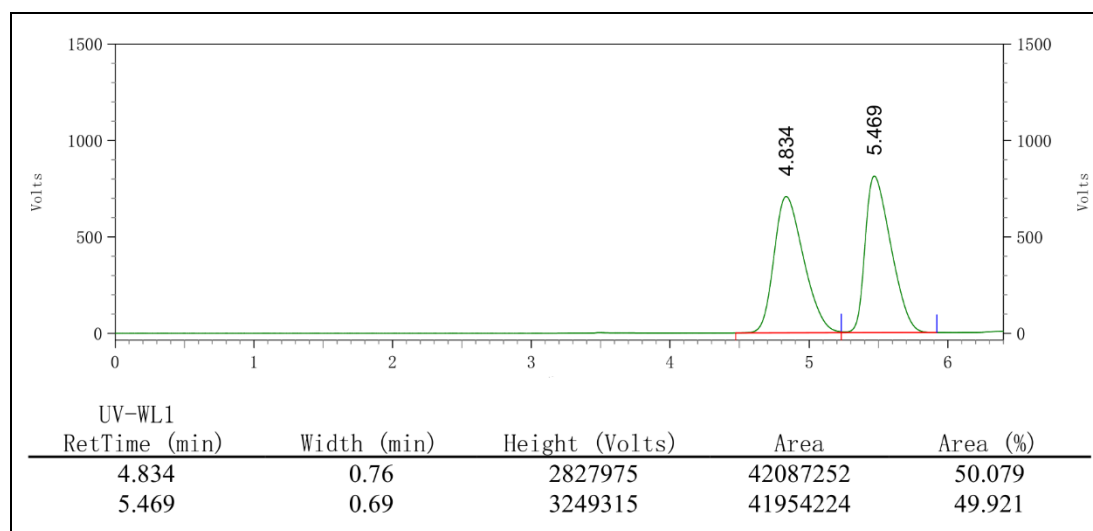

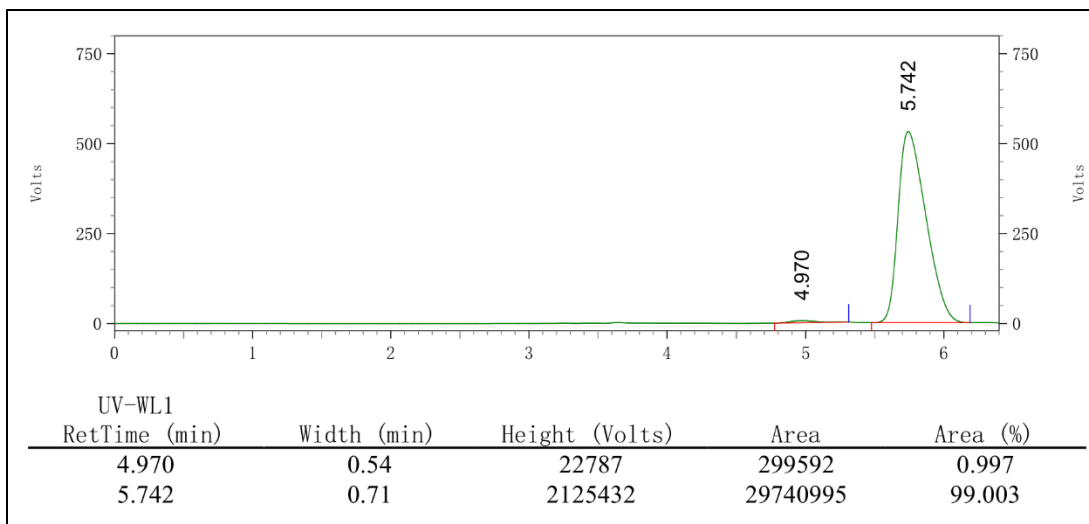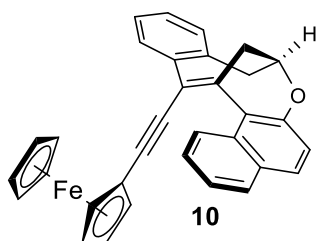

**(S)-((8,9-dihydro-8,15-methanobenzo[f]naphtho[2,1-b]oxonin-14-yl)ethynyl)ferrocene (10)**

Red solid. ( $R_f = 0.6$ , PE/EA = 15:1)

**$^1\text{H NMR}$**  (400 MHz,  $\text{CDCl}_3$ )  $\delta$  8.25 (d,  $J = 8.4$  Hz, 1H), 7.84 (d,  $J = 8.1$  Hz, 1H), 7.70 (d,  $J = 8.9$  Hz, 1H), 7.64 (t,  $J = 7.6$  Hz, 1H), 7.59 (d,  $J = 7.4$  Hz, 1H), 7.46 (t,  $J = 7.4$  Hz, 1H), 7.38 (t,  $J = 7.4$  Hz, 1H), 7.29 – 7.23 (m, 1H), 7.20 (d,  $J = 7.3$  Hz, 1H), 7.11 (d,  $J = 8.9$  Hz, 1H), 5.46 – 5.39 (m, 1H), 4.06 – 3.99 (m, 4H), 3.70 (s, 5H), 3.30 – 3.15 (m, 2H), 2.90 (d,  $J = 13.1$  Hz, 1H), 2.57 (dd,  $J = 11.8, 3.7$  Hz, 1H).

**$^{13}\text{C NMR}$**  (100 MHz,  $\text{CDCl}_3$ )  $\delta$  151.55, 140.41, 139.10, 136.97, 129.48, 129.40, 129.23, 128.81, 128.56, 128.01, 127.87, 127.66, 127.27, 125.29, 123.38, 122.37, 118.95, 118.31, 94.17, 85.50, 84.77, 71.61, 70.71, 69.91, 68.70, 40.53, 33.81.

**HRMS (ESI)**  $m/z$  Calcd for  $\text{C}_{33}\text{H}_{24}\text{FeNaO}^+$  [ $\text{M} + \text{Na}$ ] $^+$ : 515.1069, Found: 515.1085.

**Optical Rotation:**  $[\alpha]_D^{25} = -171.0^\circ$  ( $c = 0.2$ , acetone).

**HPLC analysis:** Chiralcel IA-H (Hexane/*i*-PrOH = 98:2, flow rate = 1.0 mL/min, wave length = 254 nm),  $t_R = 6.142$  min (major),  $t_R = 6.744$  min (minor), 97% ee.

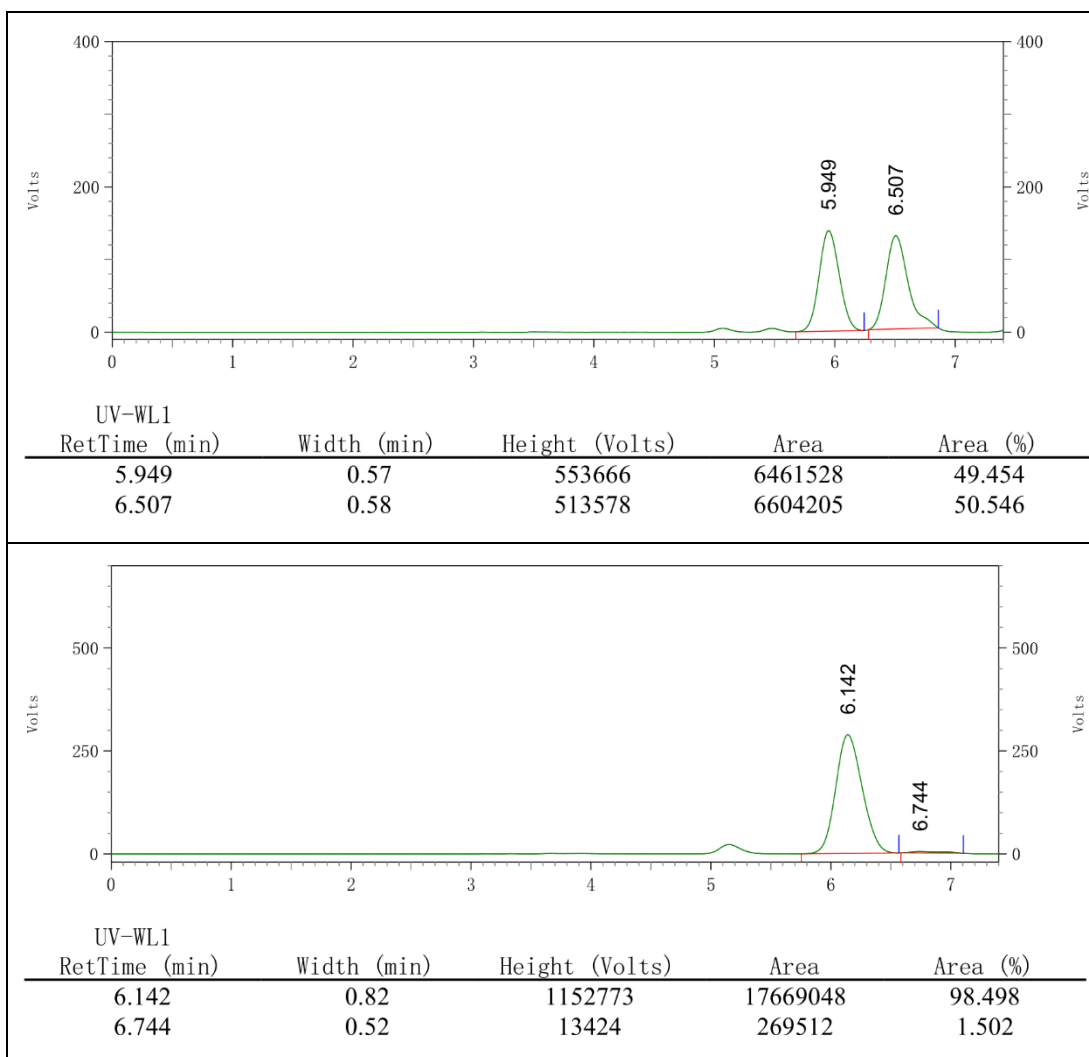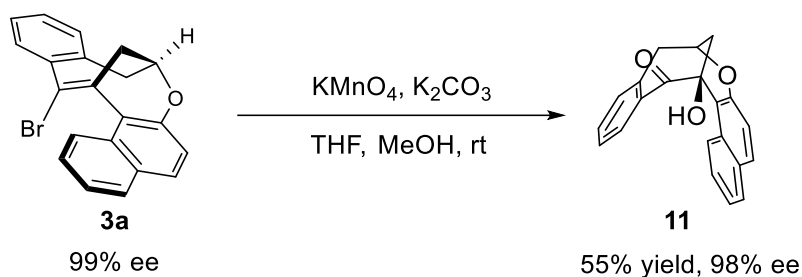

**3a** (73 mg, 0.2 mmol, 1.0 equiv.)  $\text{KMnO}_4$  (126 mg, 0.8 mmol, 4 equiv.) and  $\text{K}_2\text{CO}_3$  (110 mg, 0.8 mmol, 4 equiv.) was dissolved in THF (2 mL) and MeOH (2 mL). The mixture was stirred overnight at room temperature. Removal of solvent under reduced pressure, purified by flash chromatography on silica gel (PE/EA = 5:1) to afford the product **11** (34.8 mg, 0.11 mmol, 55% yield) as a white solid.

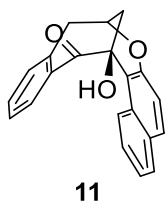

**(15S)-15-hydroxy-8,9-dihydro-8,15-methanobenzo[f]naphtho[2,1-b]oxonin-14(15H)-one (11)**

Yellow solid. ( $R_f = 0.5$ , PE/EA = 3:1)

**$^1\text{H NMR}$**  (600 MHz,  $\text{CDCl}_3$ )  $\delta$  7.86 (d,  $J = 8.7$  Hz, 1H), 7.52 (d,  $J = 8.0$  Hz, 1H), 7.43 (d,  $J = 8.9$  Hz, 1H), 7.35 (t,  $J = 7.8$  Hz, 1H), 7.18 (t,  $J = 8.5$  Hz, 2H), 7.10 – 6.99 (m, 2H), 6.92 – 6.81 (m, 2H), 4.96 (s, 1H), 4.91 – 4.85 (m, 1H), 3.39 (dd,  $J = 16.2, 5.6$  Hz, 1H), 3.15 (d,  $J = 16.2$  Hz, 1H), 3.04 (dd,  $J = 14.0, 5.7$  Hz, 1H), 2.58 (d,  $J = 14.0$  Hz, 1H).

**$^{13}\text{C NMR}$**  (150 MHz,  $\text{CDCl}_3$ )  $\delta$  206.62, 153.22, 136.41, 133.73, 131.52, 131.14, 130.90, 130.84, 129.14, 128.64, 128.37, 127.00, 126.47, 123.92, 123.01, 118.34, 114.36, 74.51, 71.82, 42.34, 39.75.

**HRMS (ESI)**  $m/z$  Calcd for  $\text{C}_{21}\text{H}_{16}\text{NaO}_3^+$  [ $\text{M} + \text{Na}$ ] $^+$ : 339.0992, Found: 339.0990.

**Optical Rotation:**  $[\alpha]_D^{25} = +44.8^\circ$  ( $c = 0.5$ , acetone).

**HPLC analysis:** Chiralcel AD-H (Hexane/*i*-PrOH = 80:20, flow rate = 1.0 mL/min, wave length = 254 nm),  $t_R = 11.834$  min (major),  $t_R = 15.593$  min (minor), 98% ee.

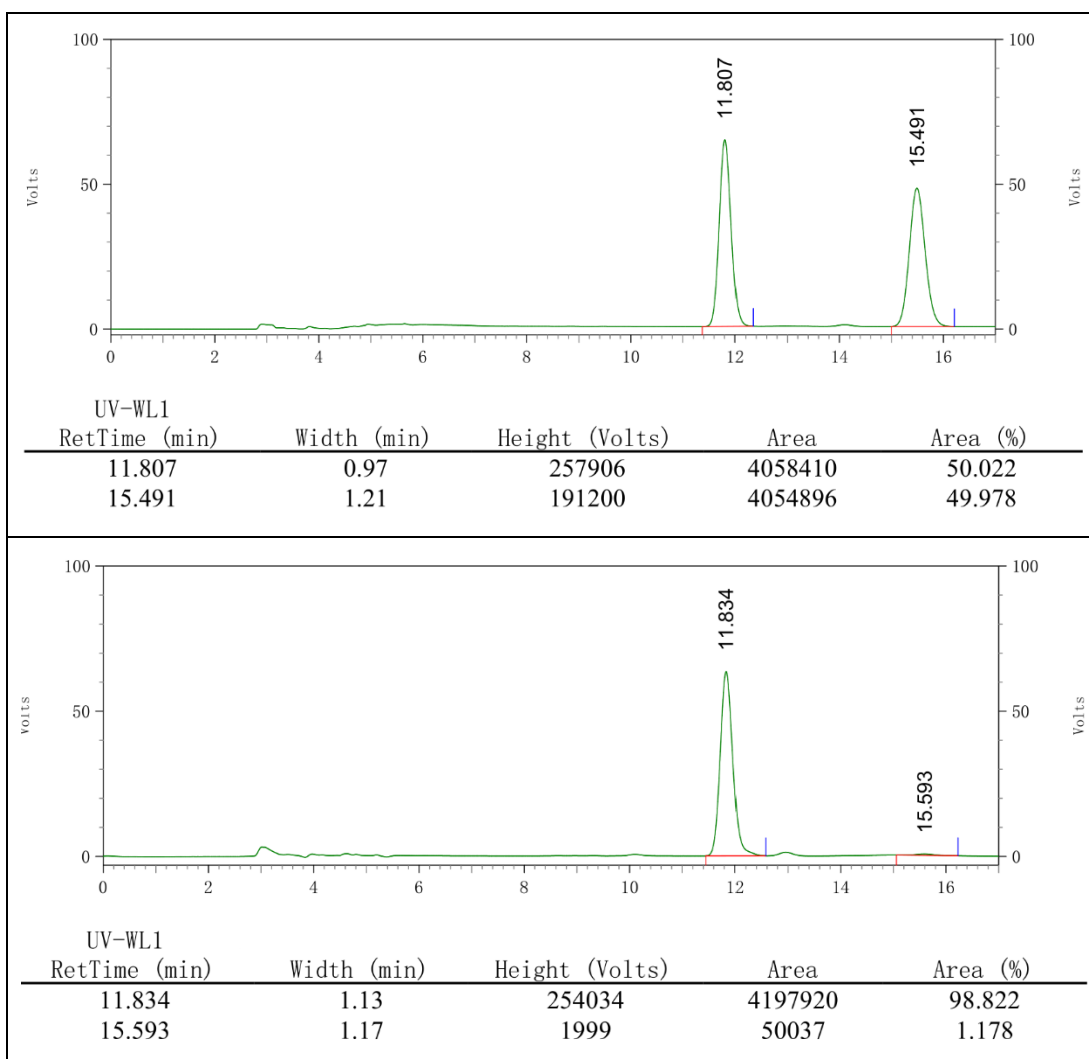

## X. Thermal stability experiments

### Thermal stability of 3a:

A solution of **3a** (5 mg, 99% ee after recrystallization) in DMF (1 mL) was heated at 120 °C. At intervals, the enantiomeric excess was determined by HPLC.

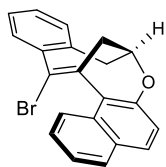

**3a**, 99% ee  
120 °C after one week  
99% ee

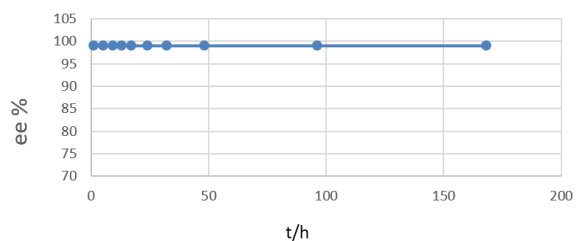

### Thermal stability of 3s:

A solution of **3s** (5 mg, 98% ee, after recrystallization) in DMF (1 mL) was heated at 120 °C. At intervals, the enantiomeric excess was determined by HPLC.

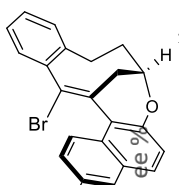

**3s**, 98% ee  
120 °C after one week  
98% ee

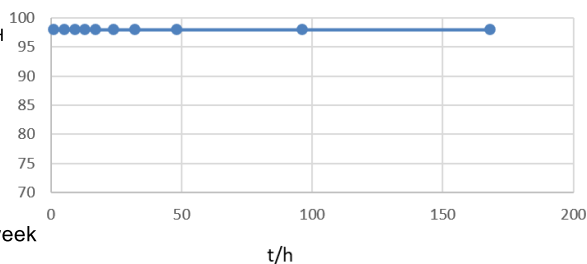

# XI. <sup>1</sup>H and <sup>13</sup>C NMR spectra

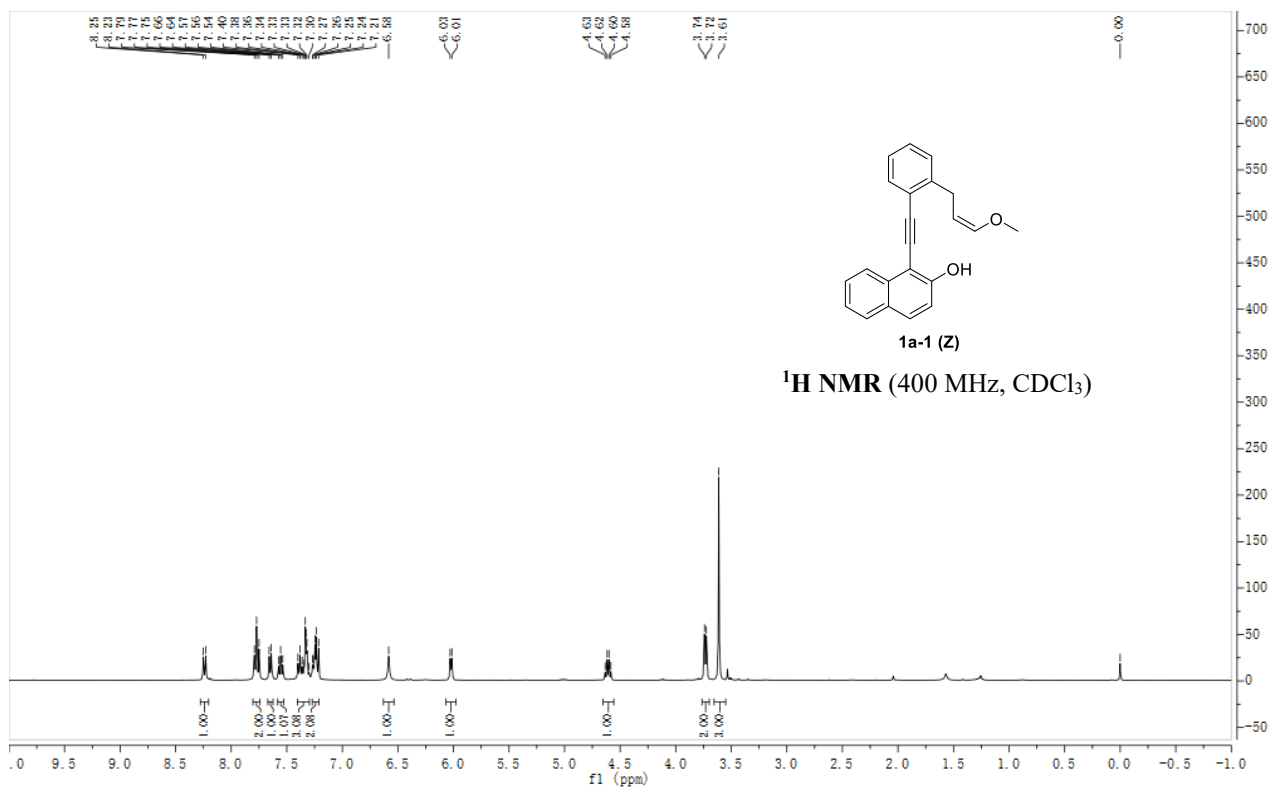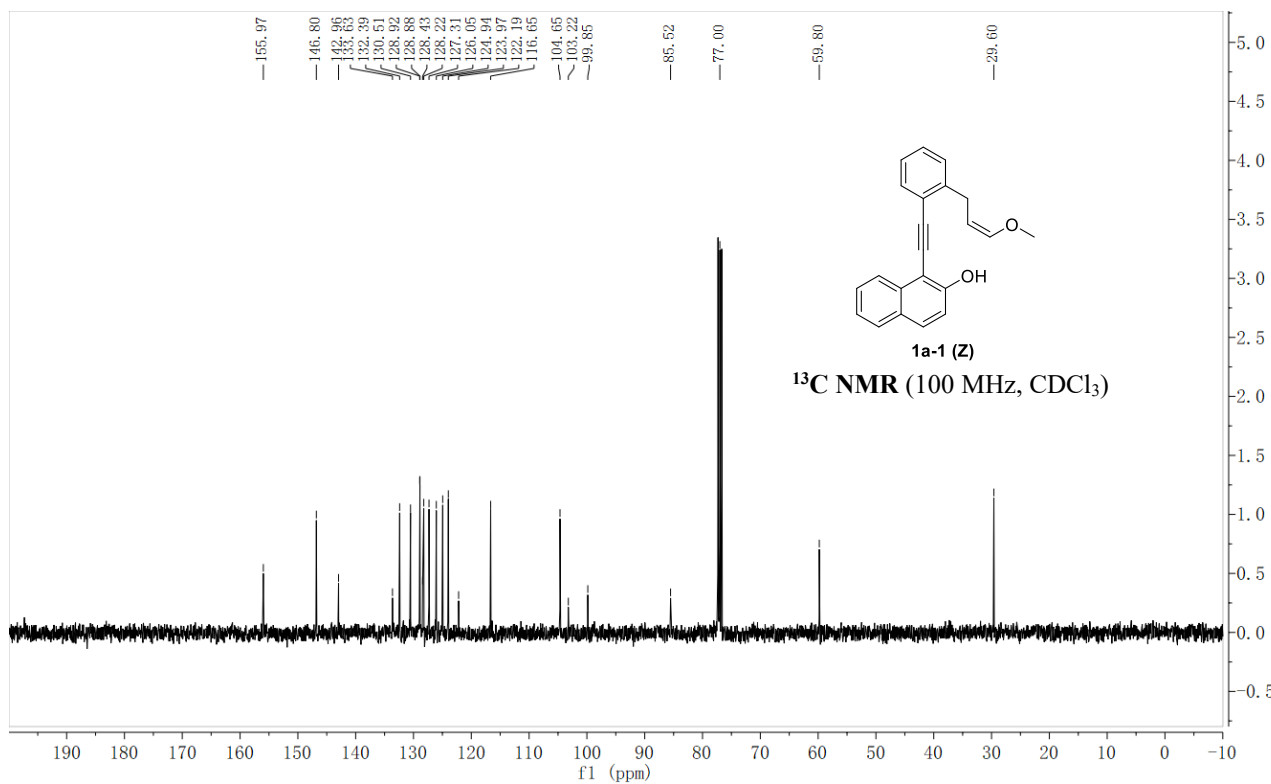



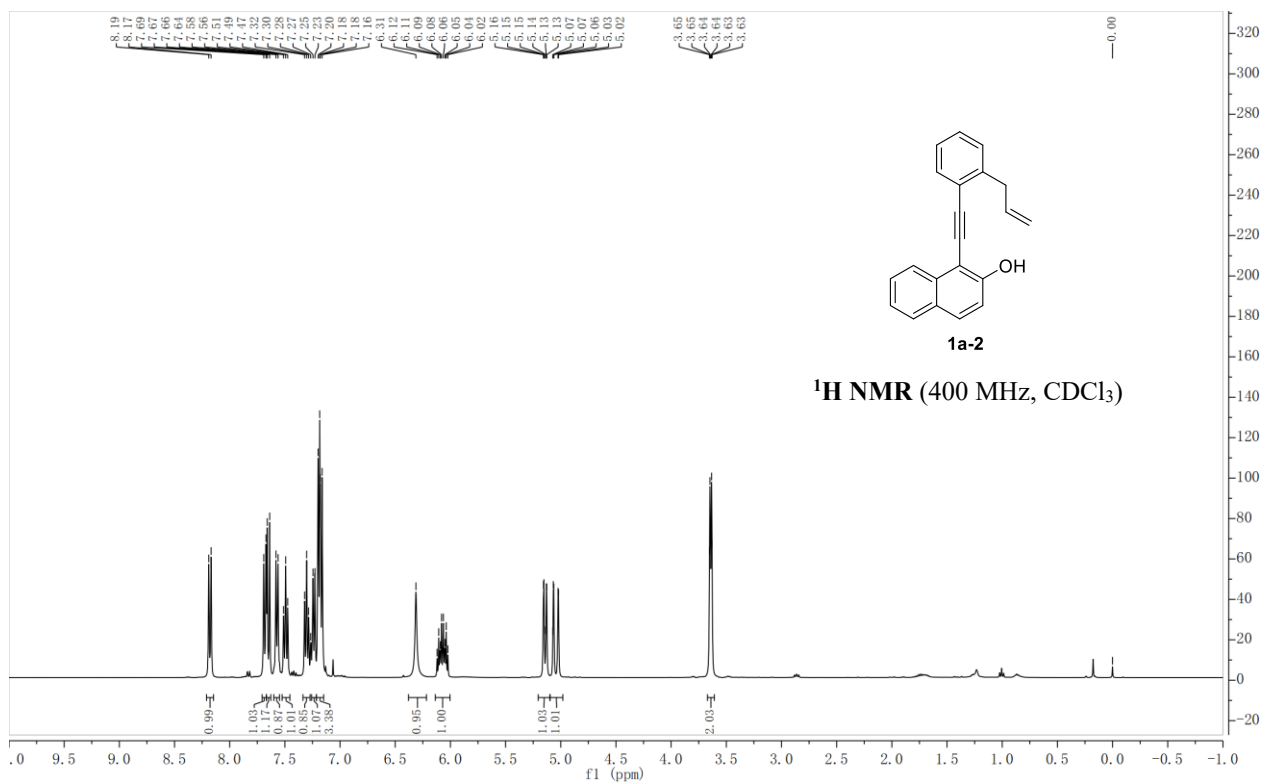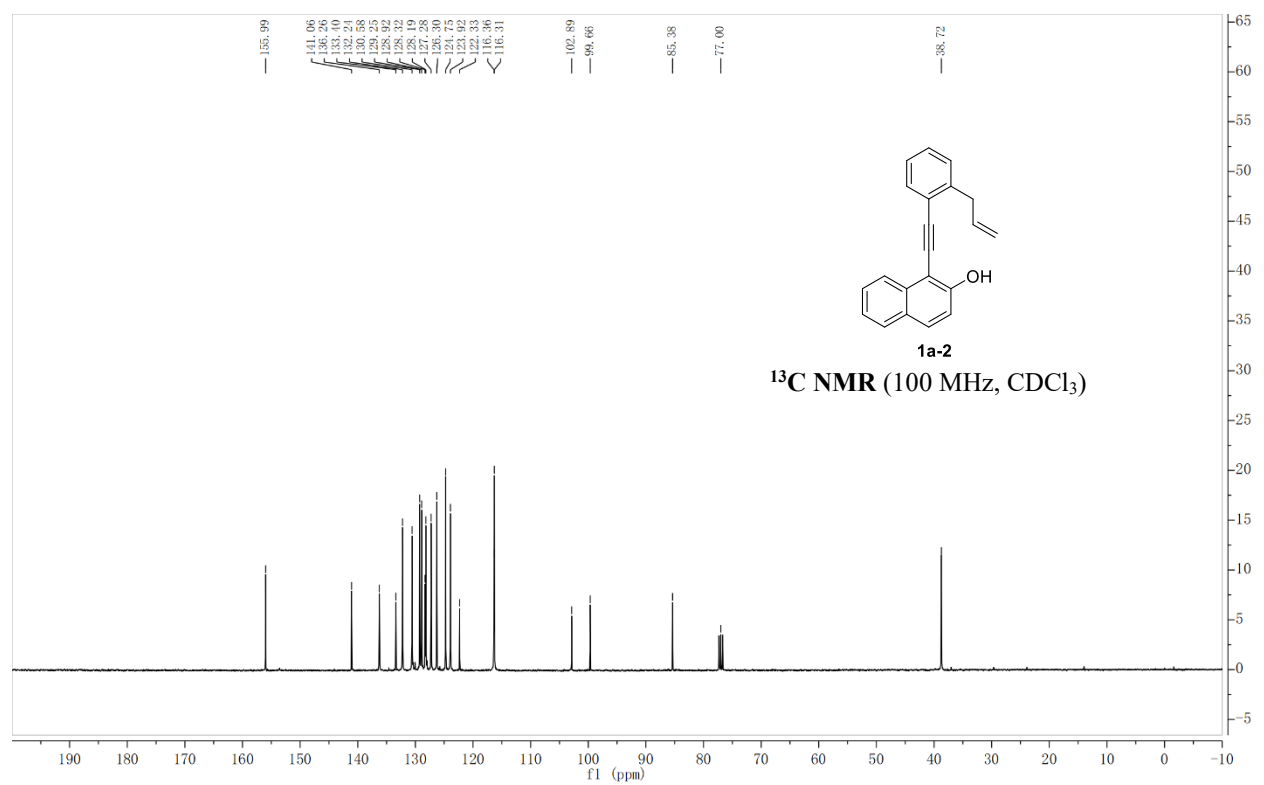

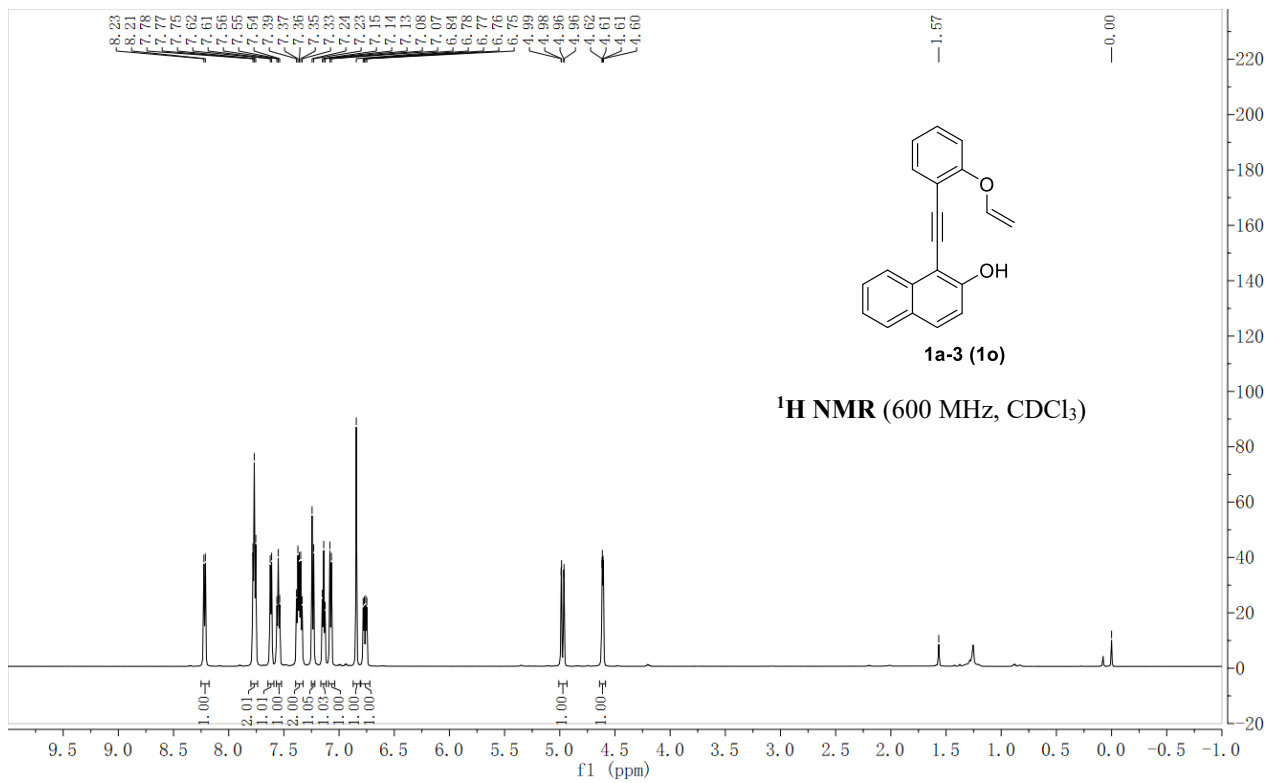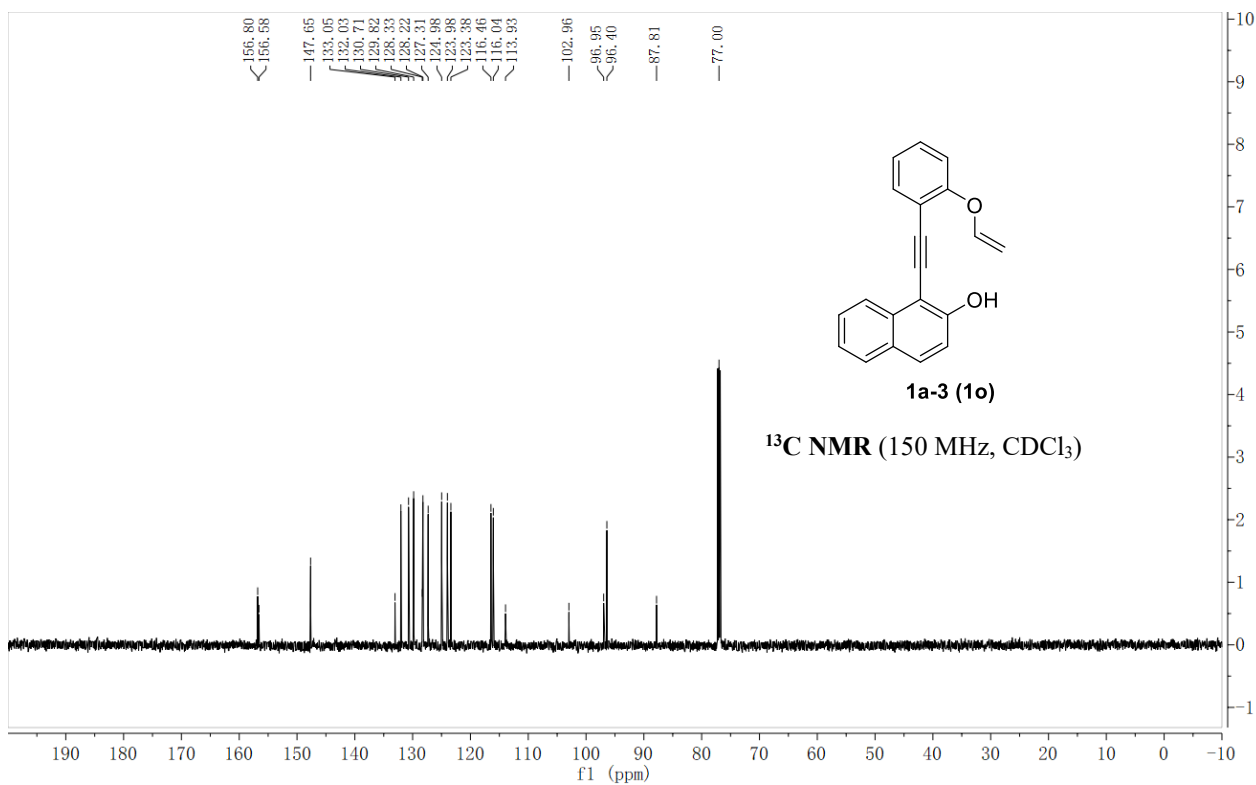

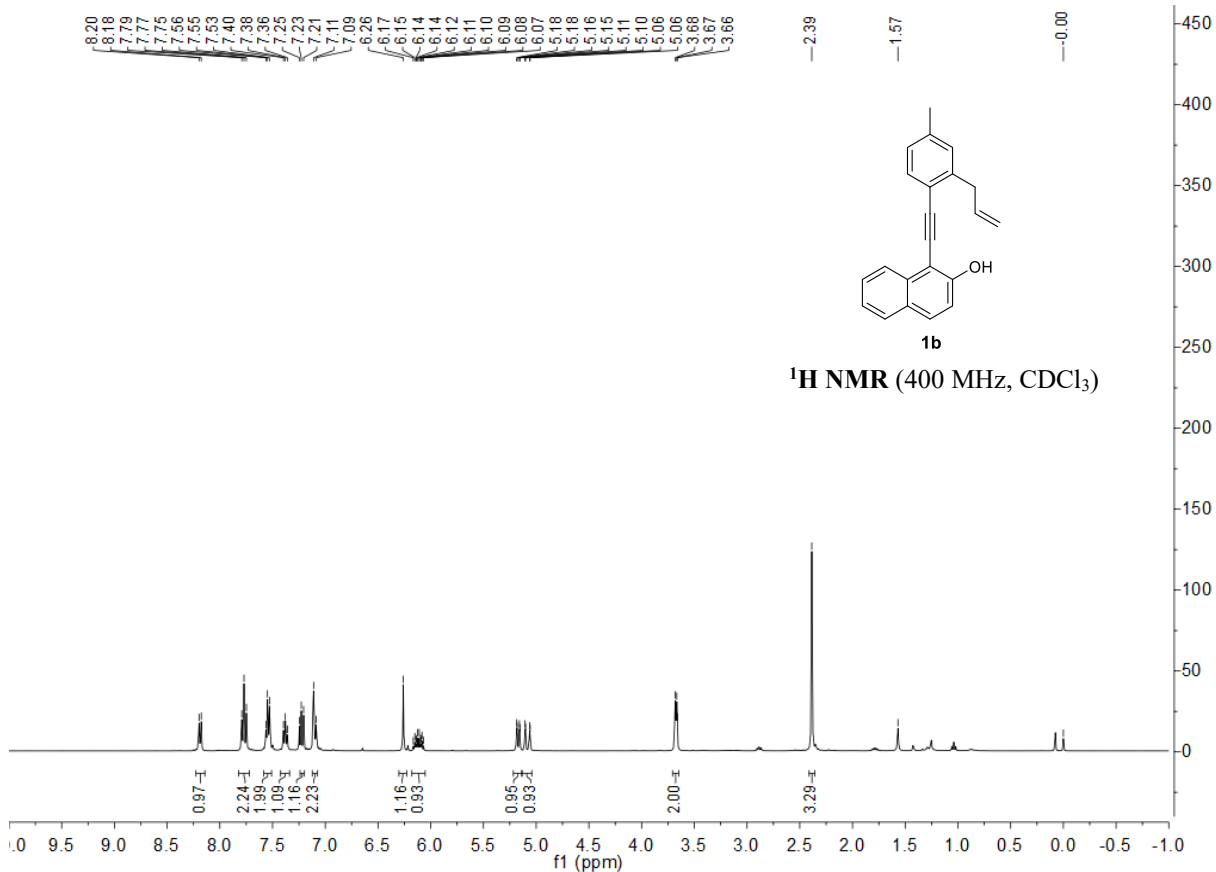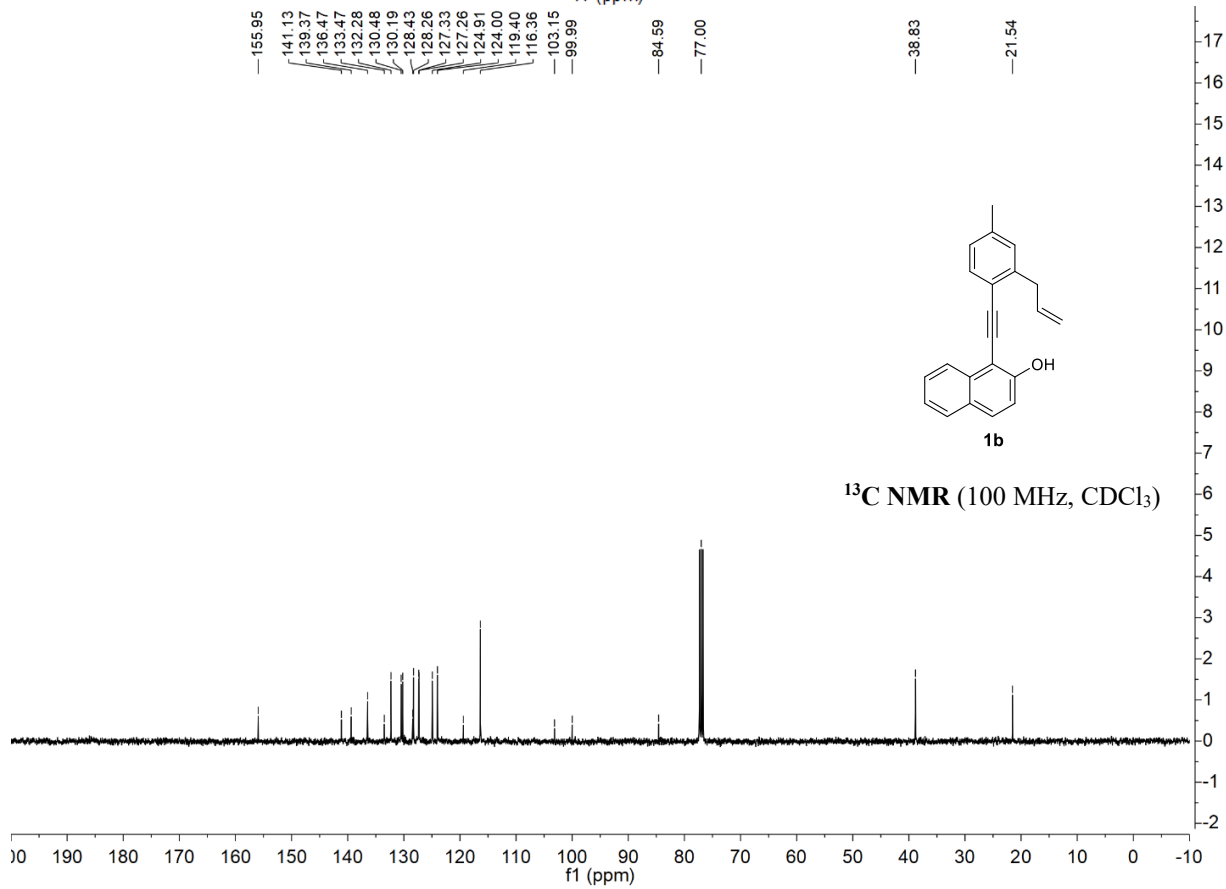

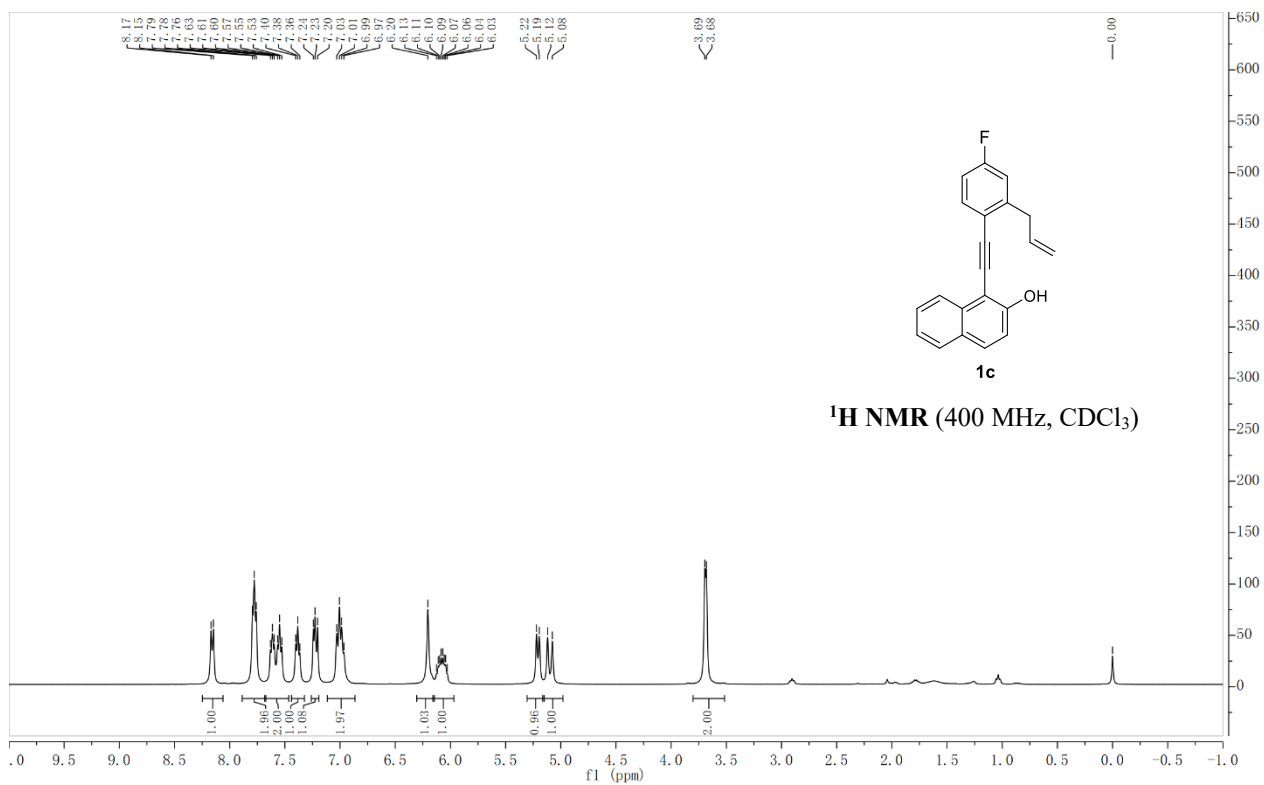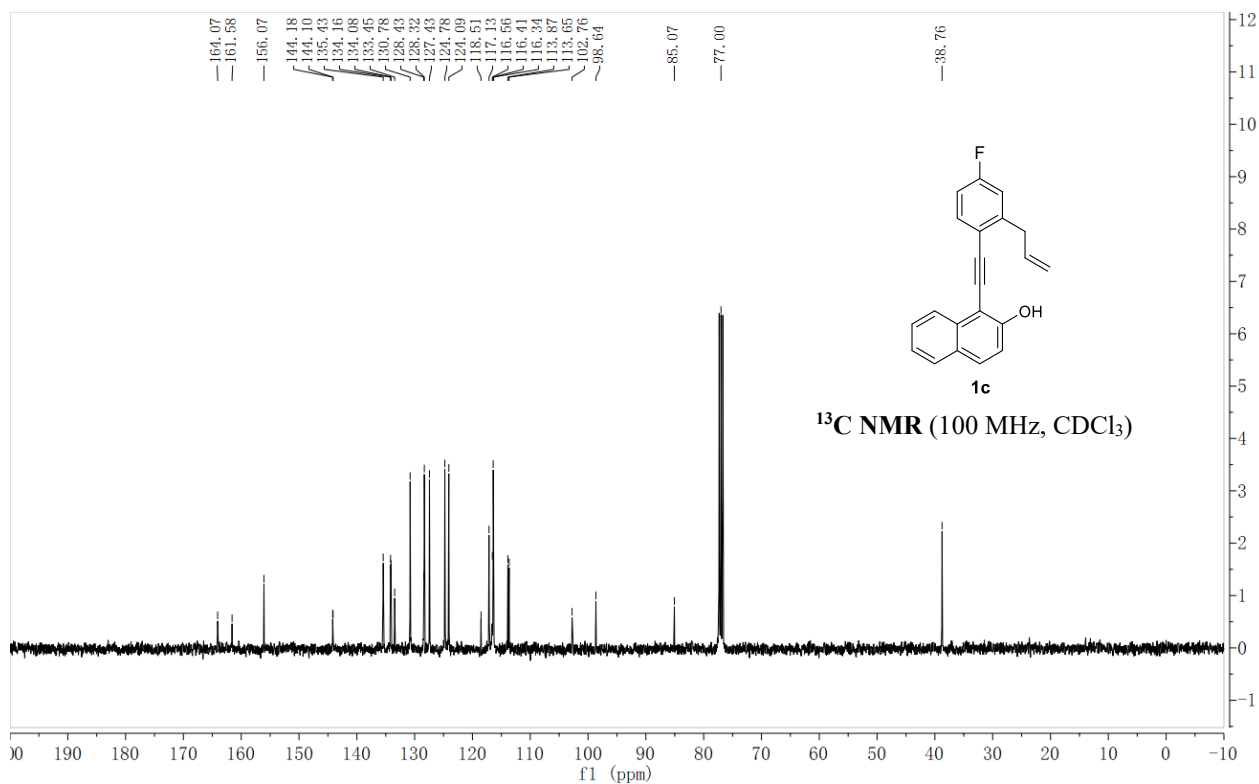

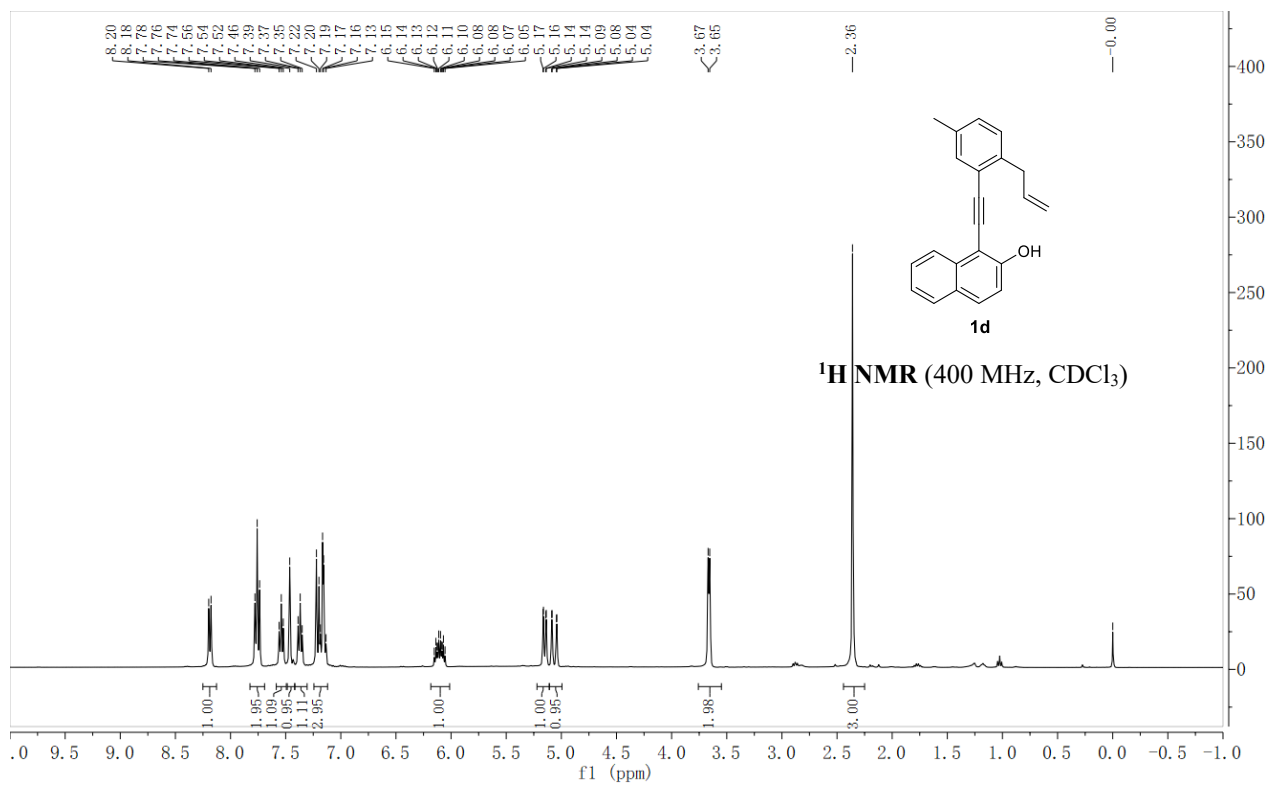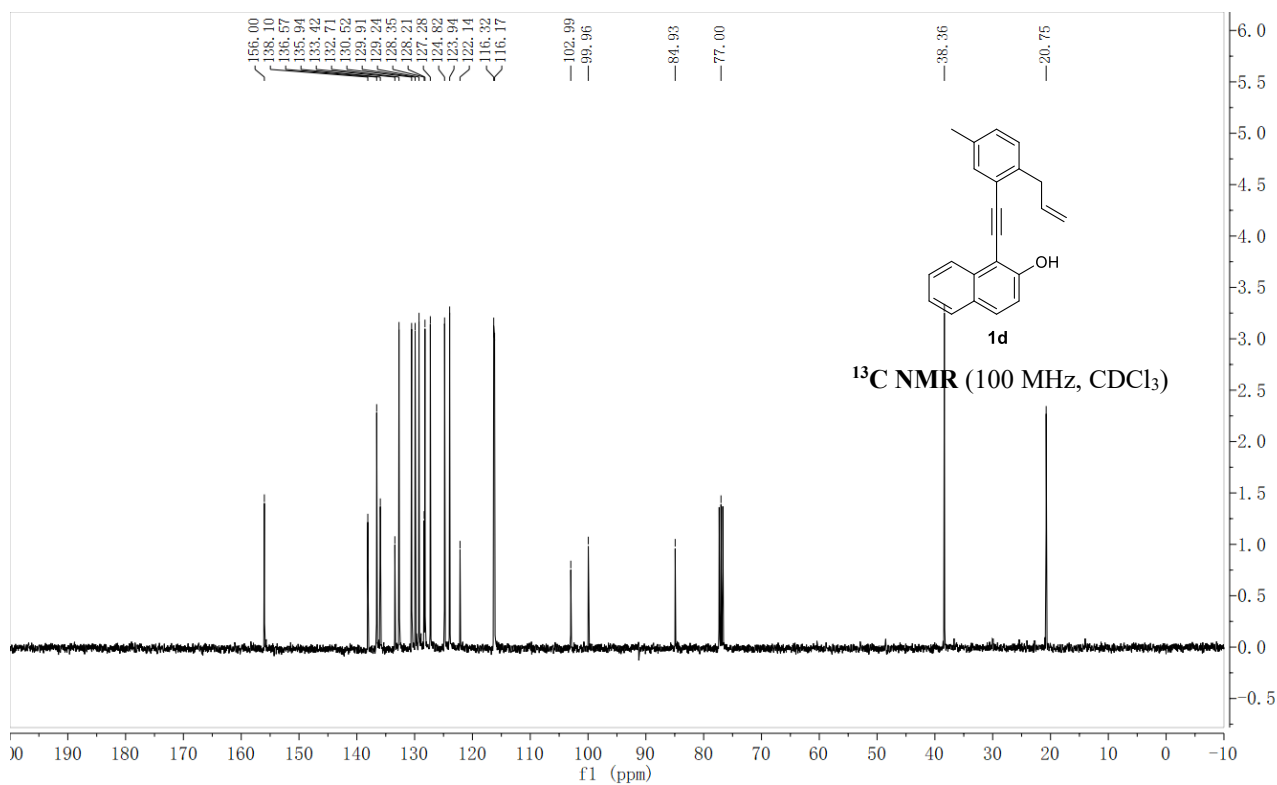

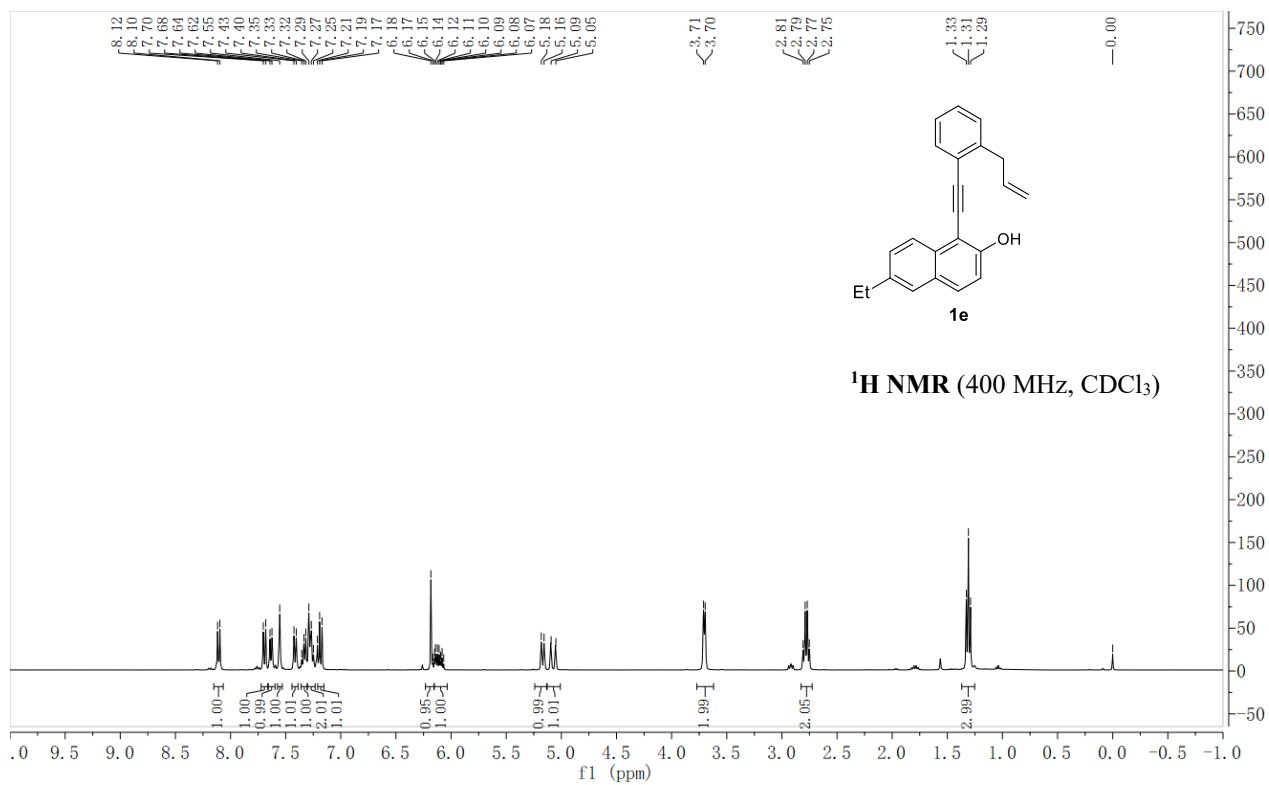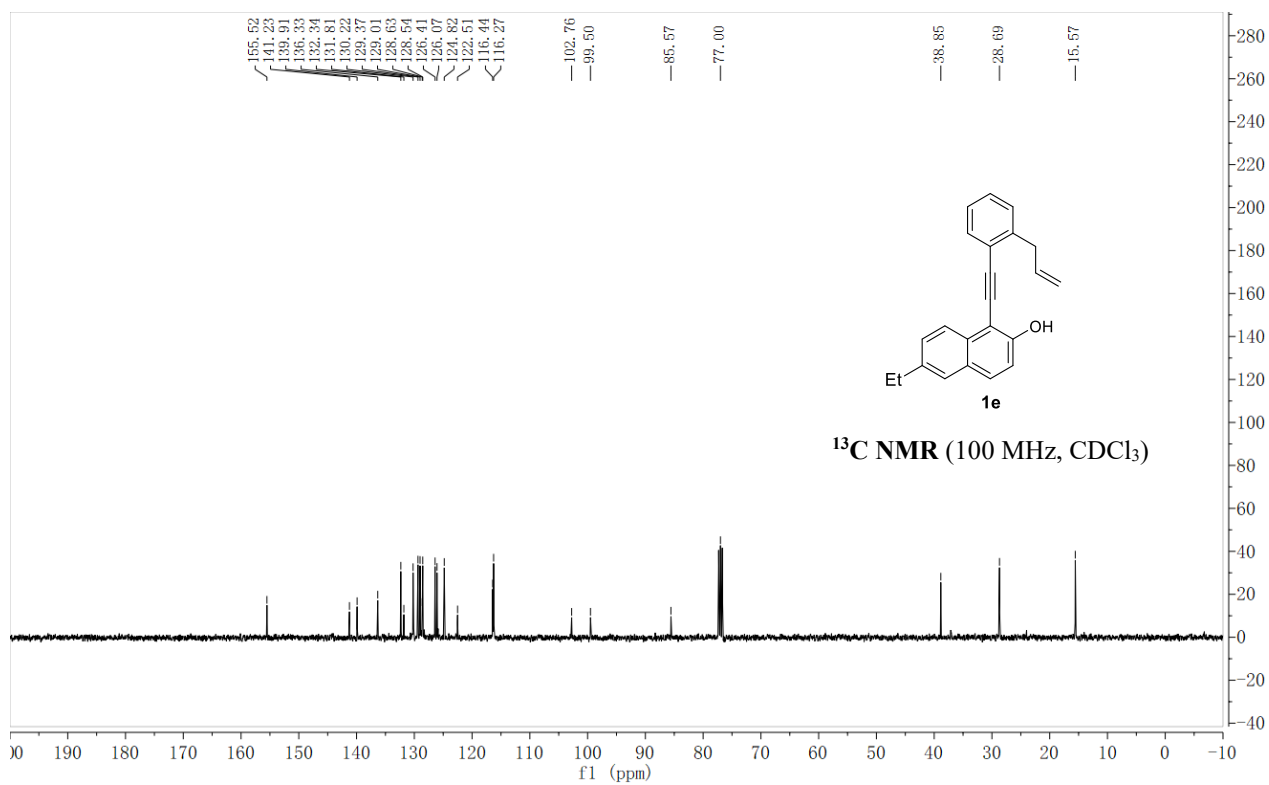

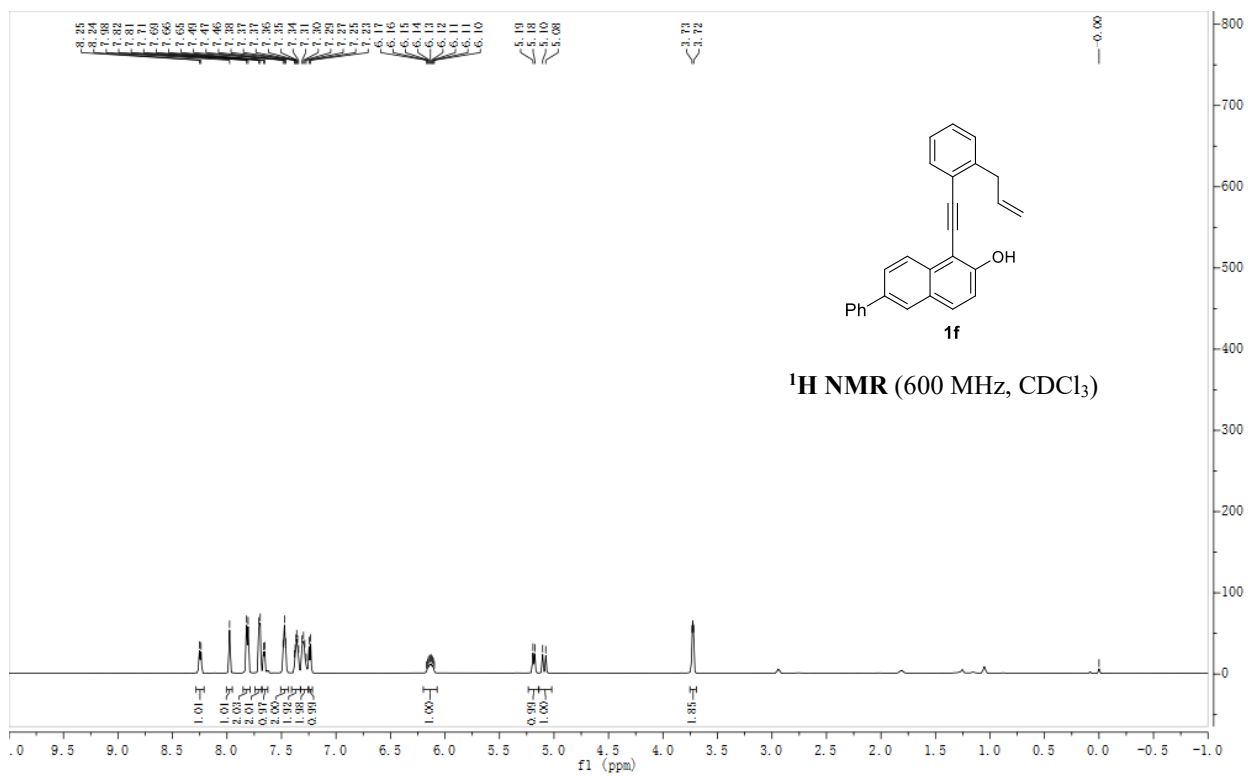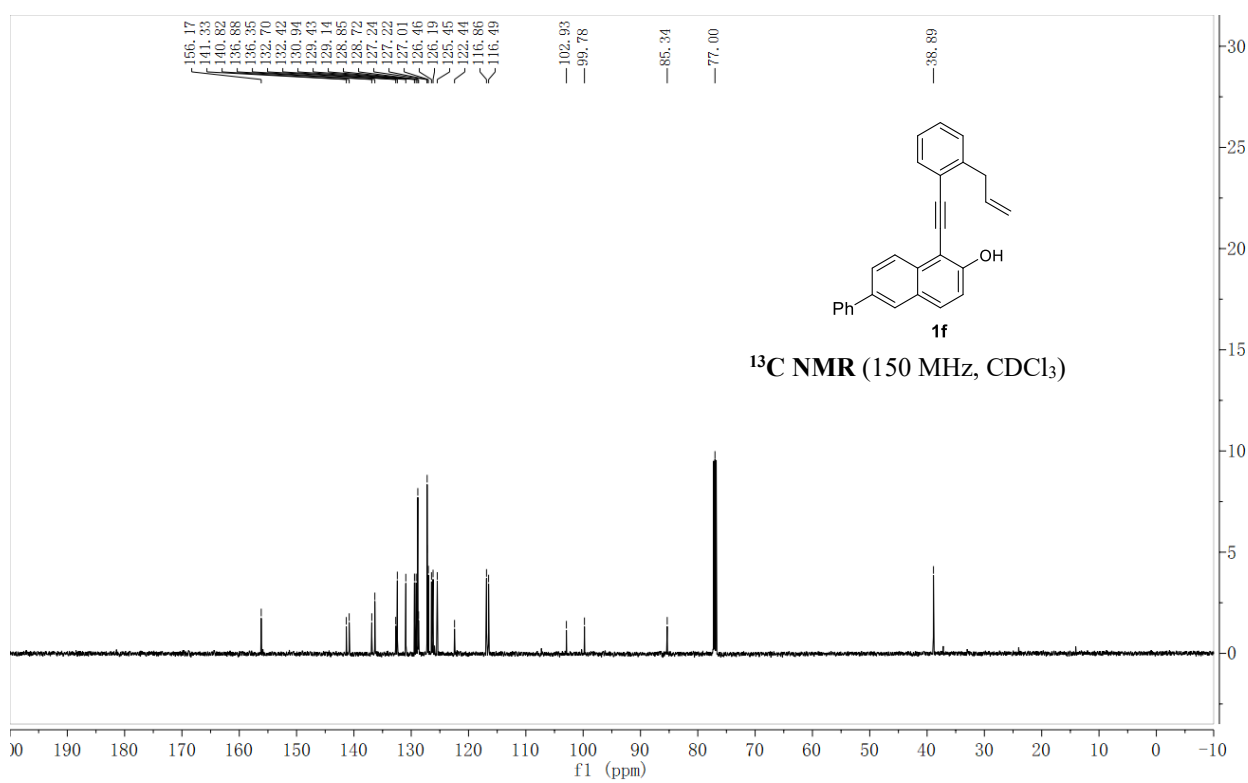

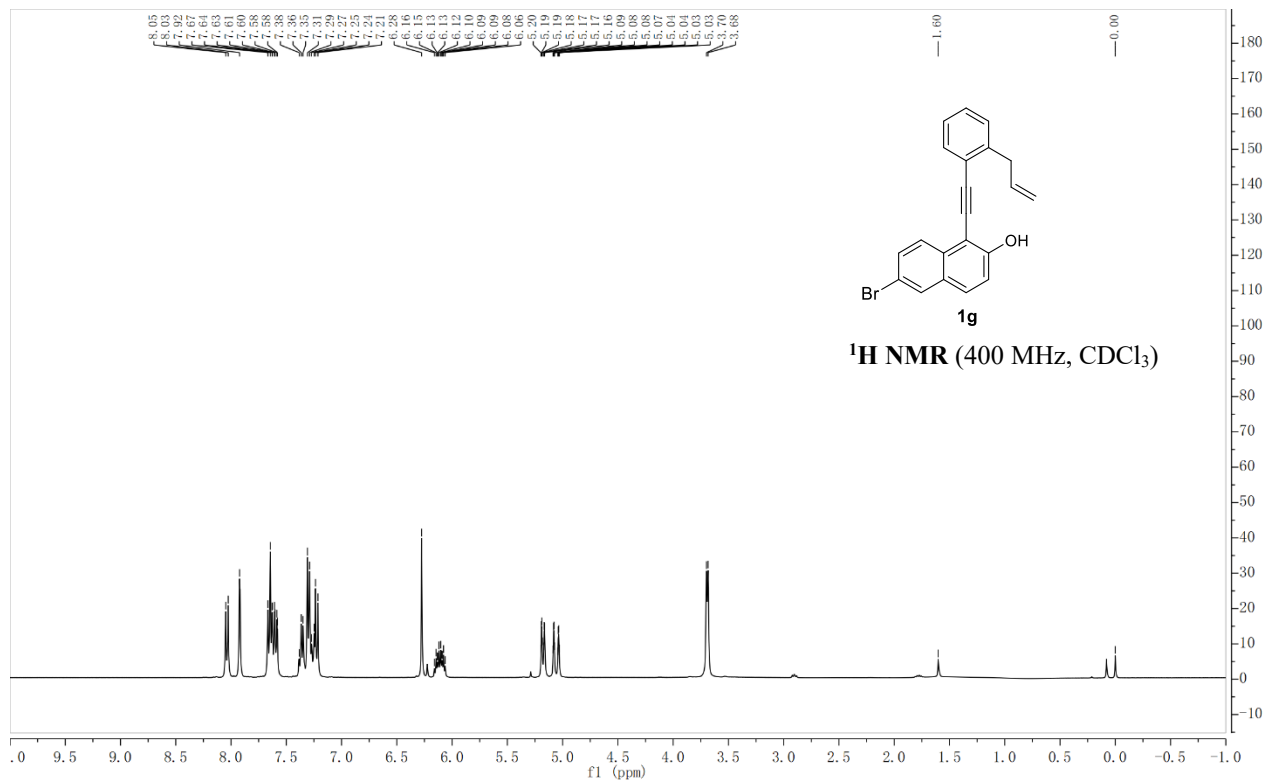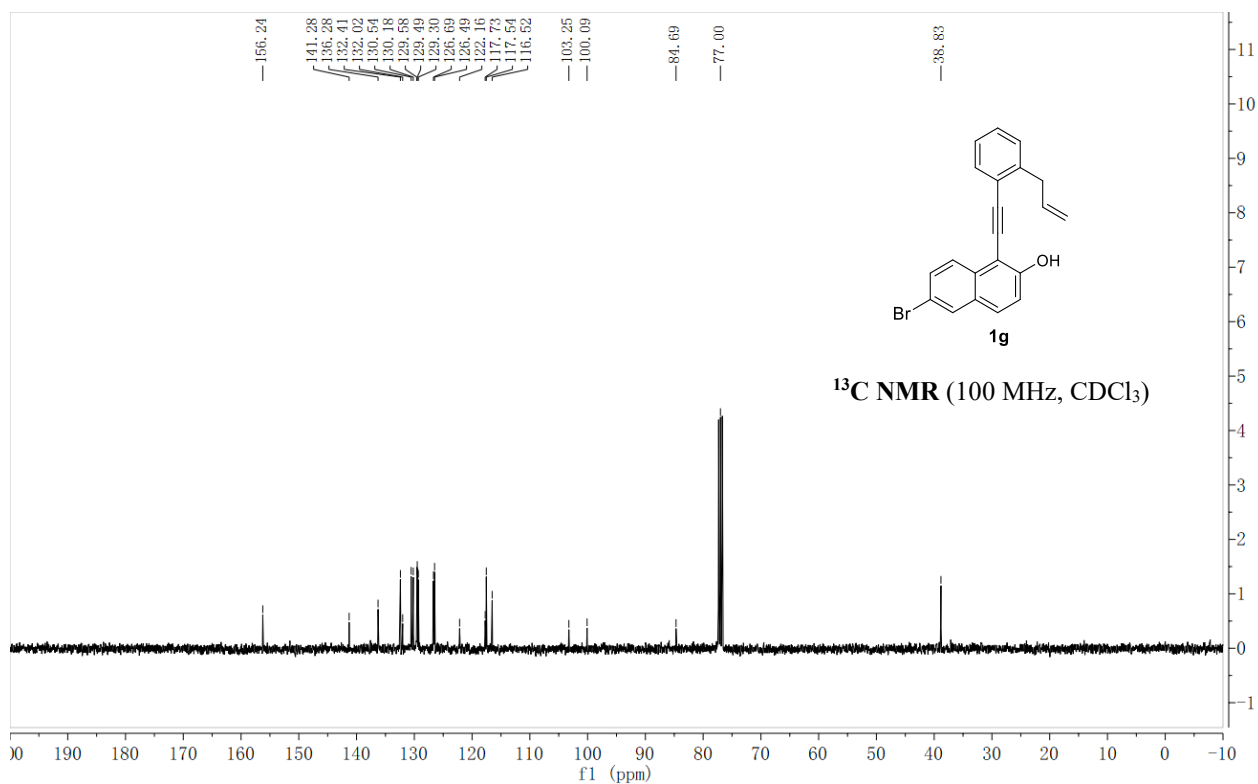



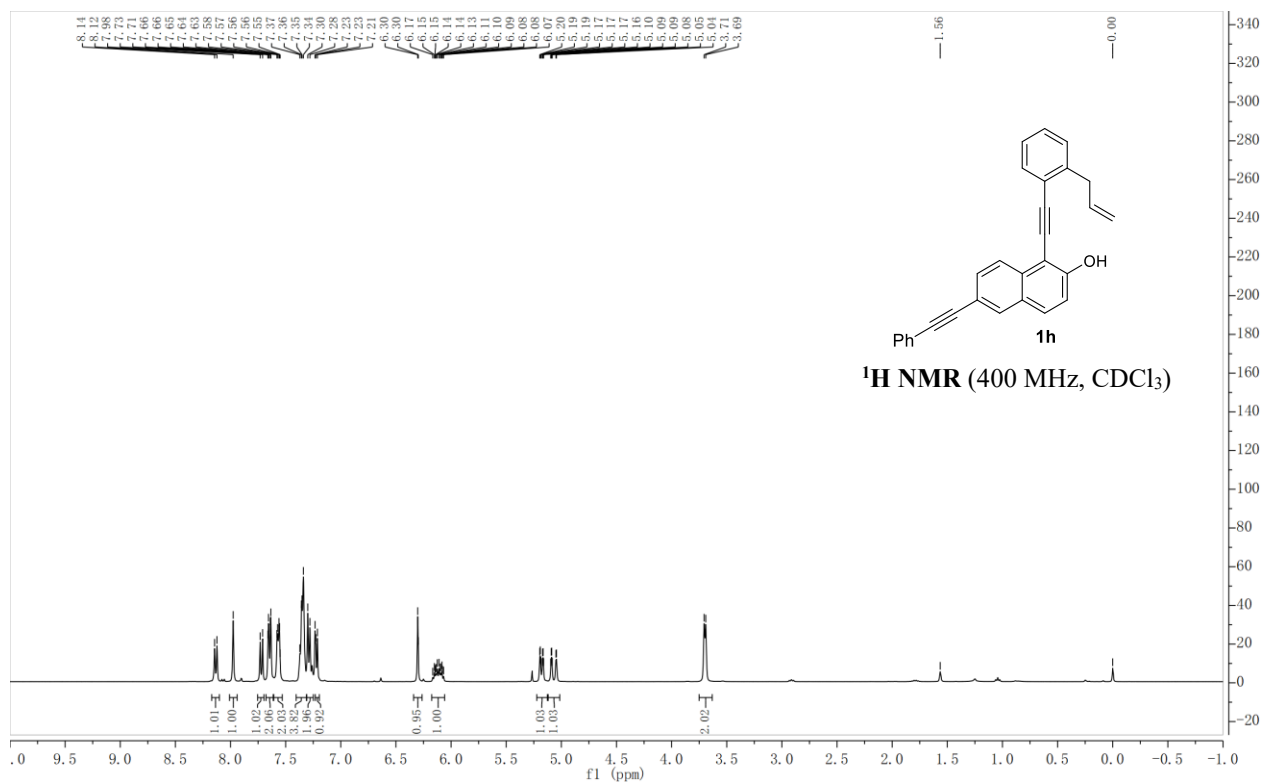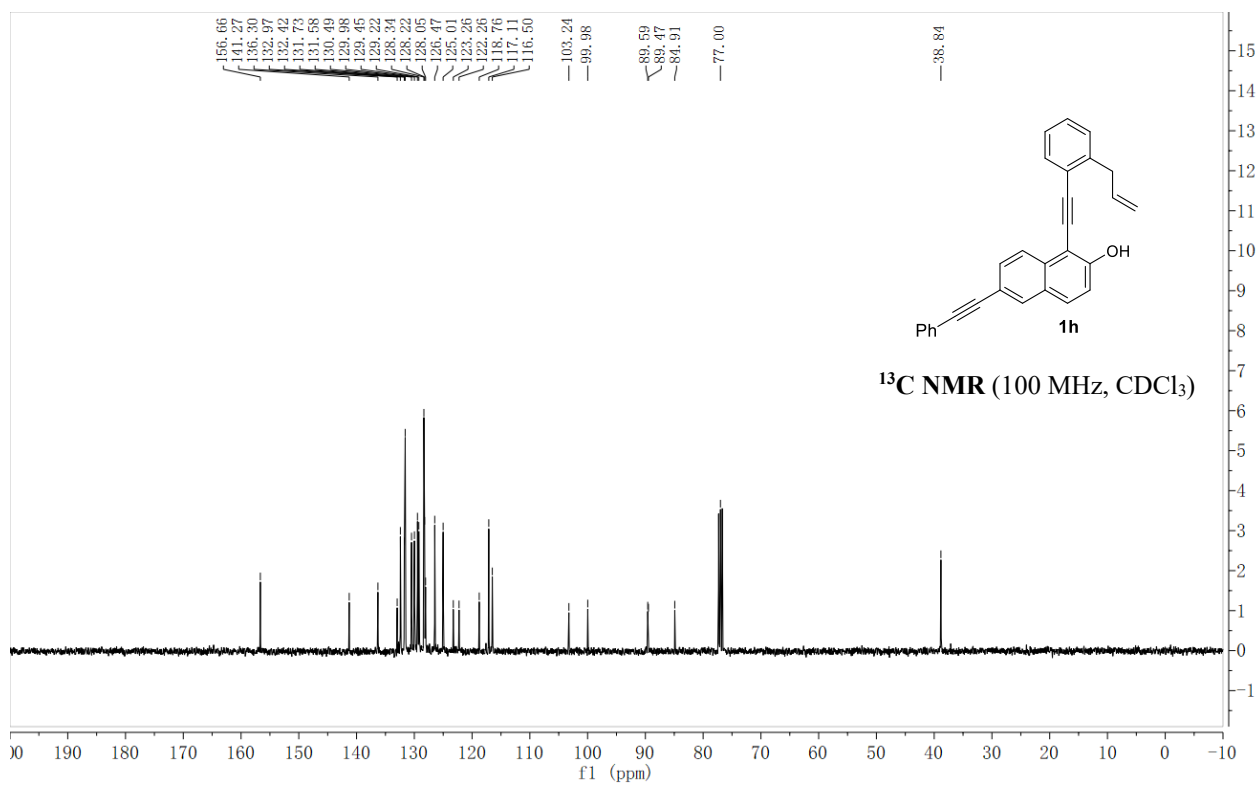

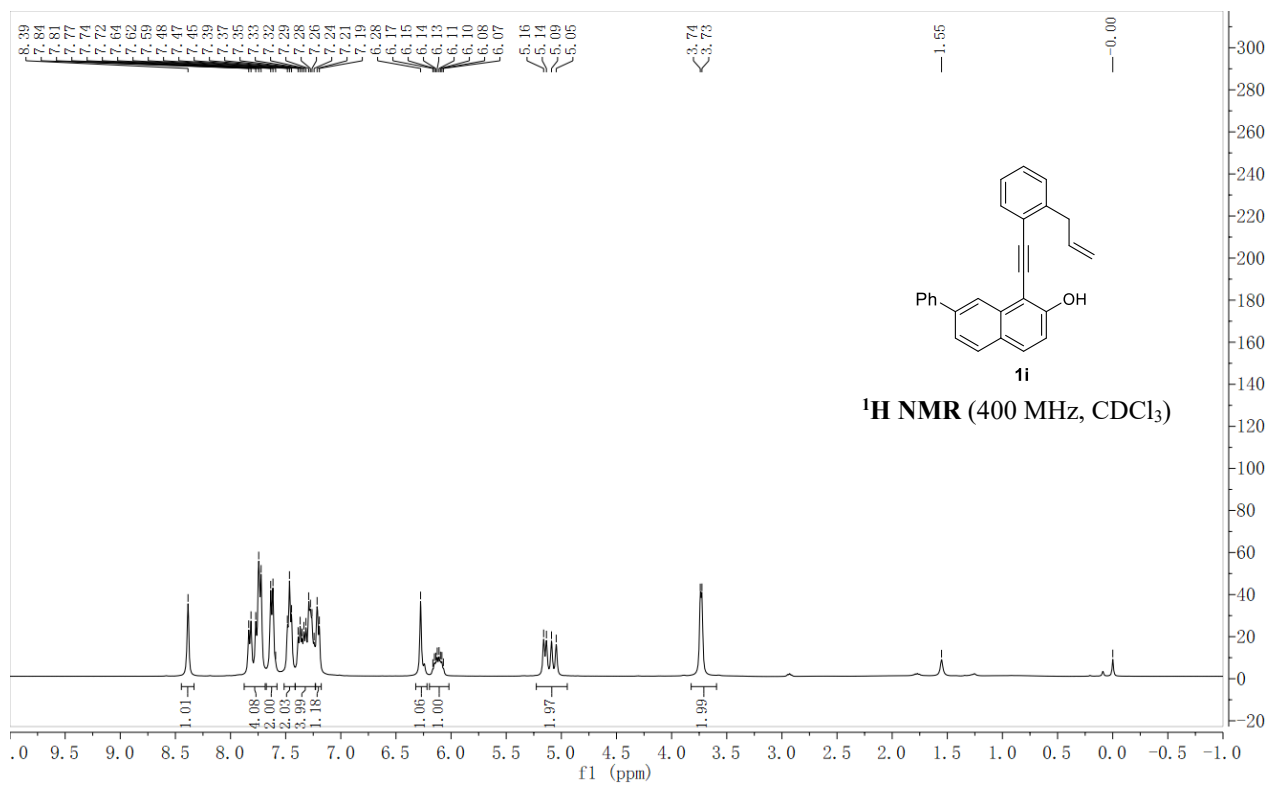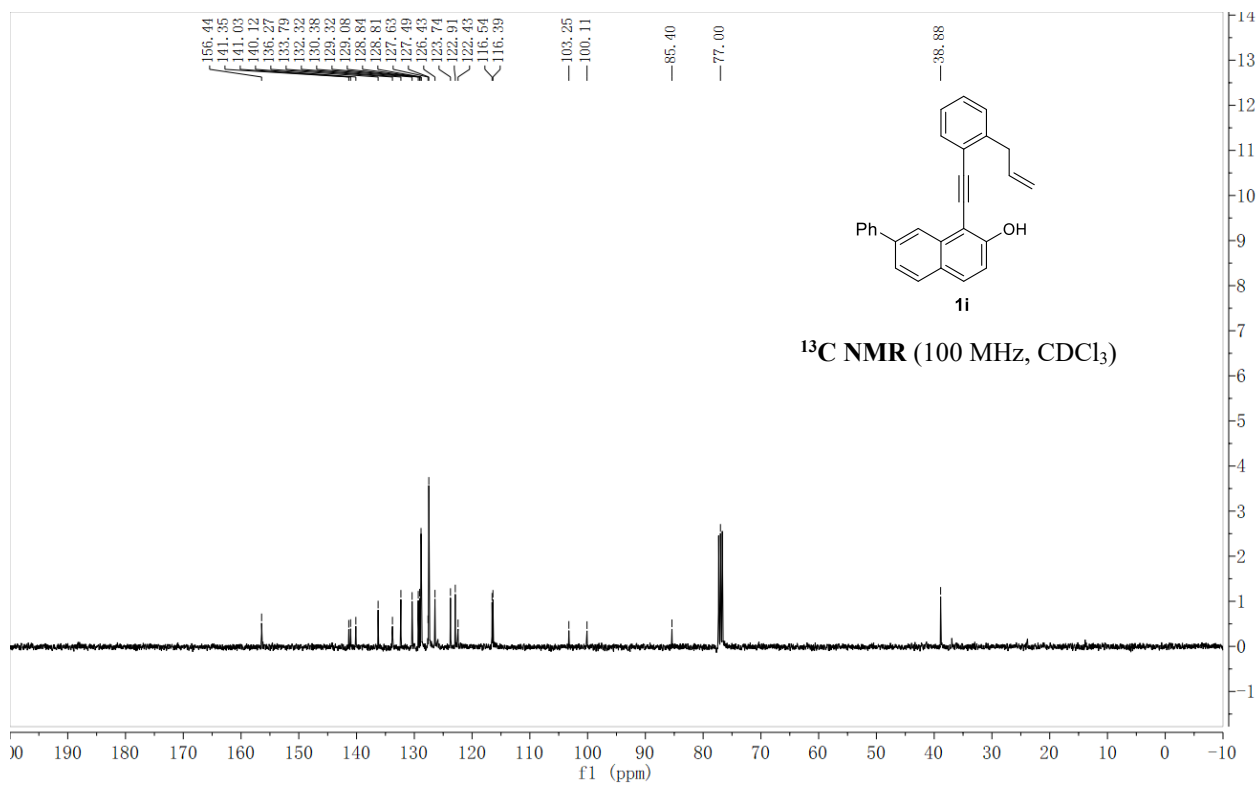

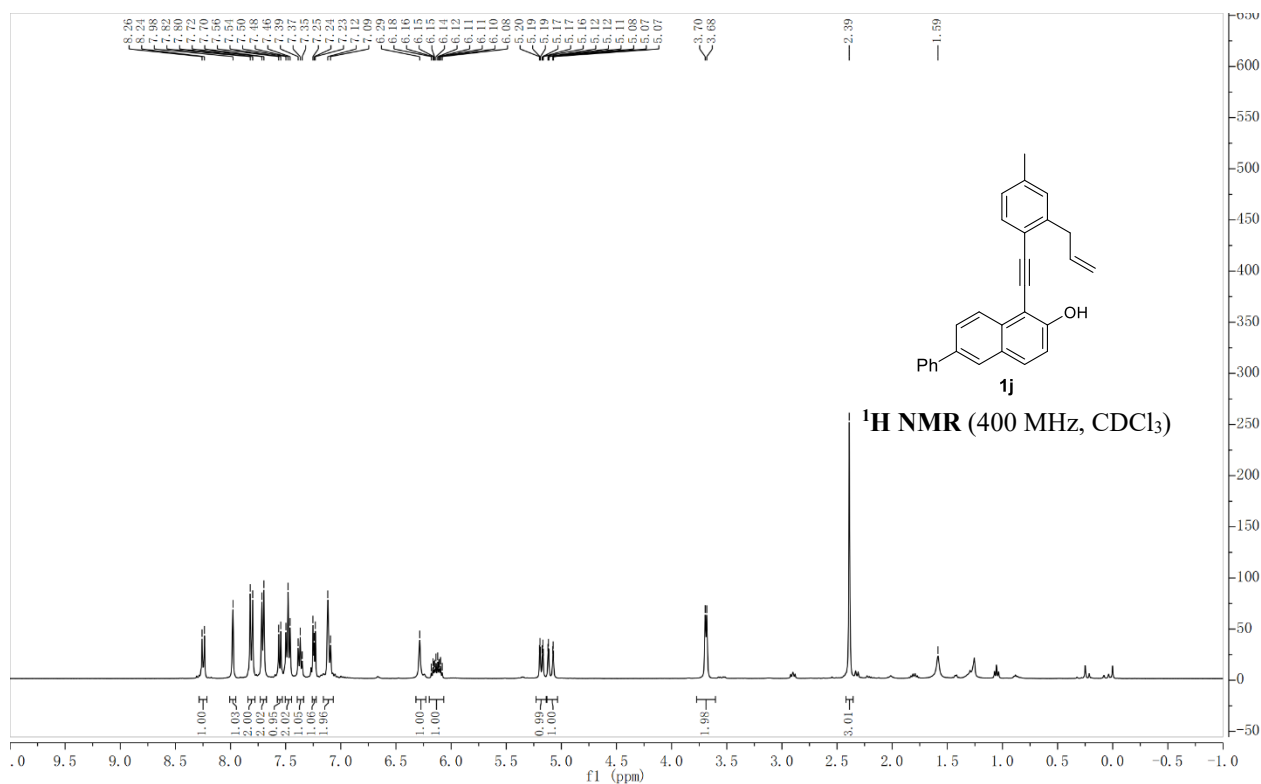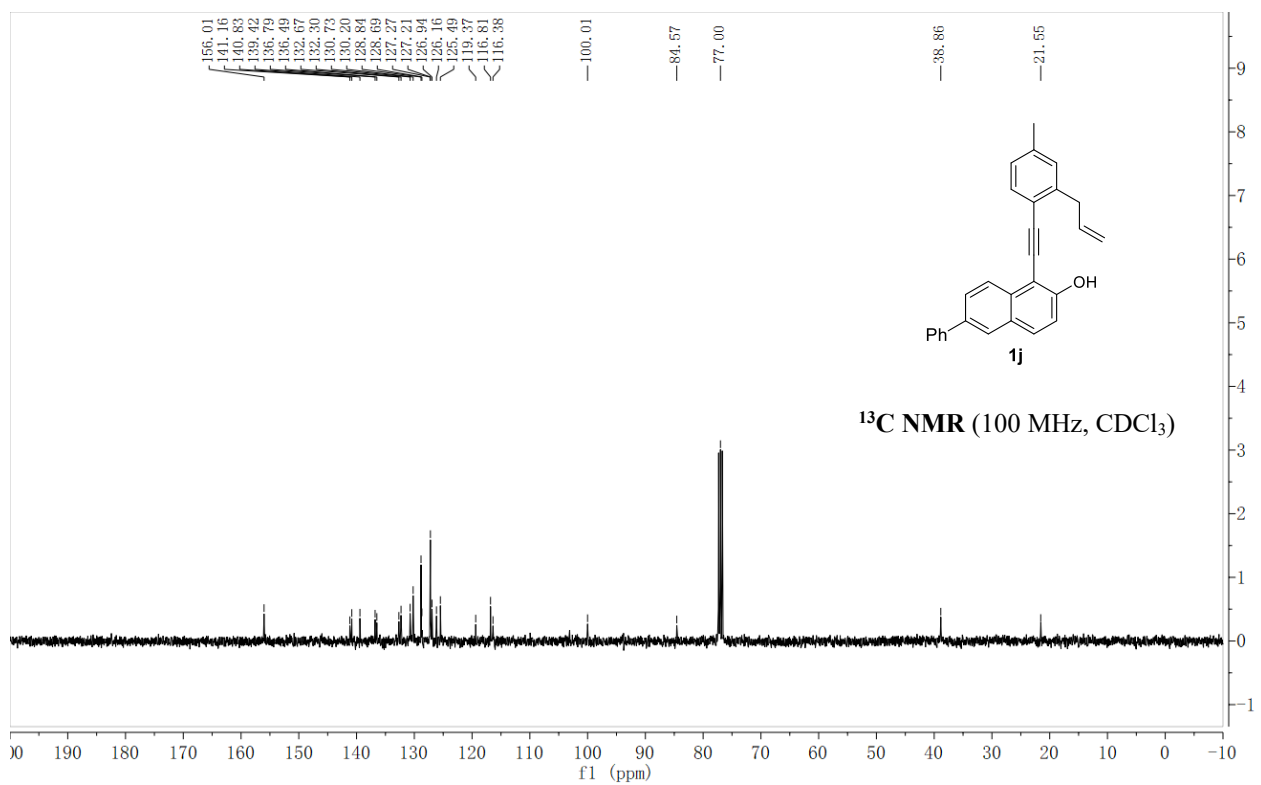

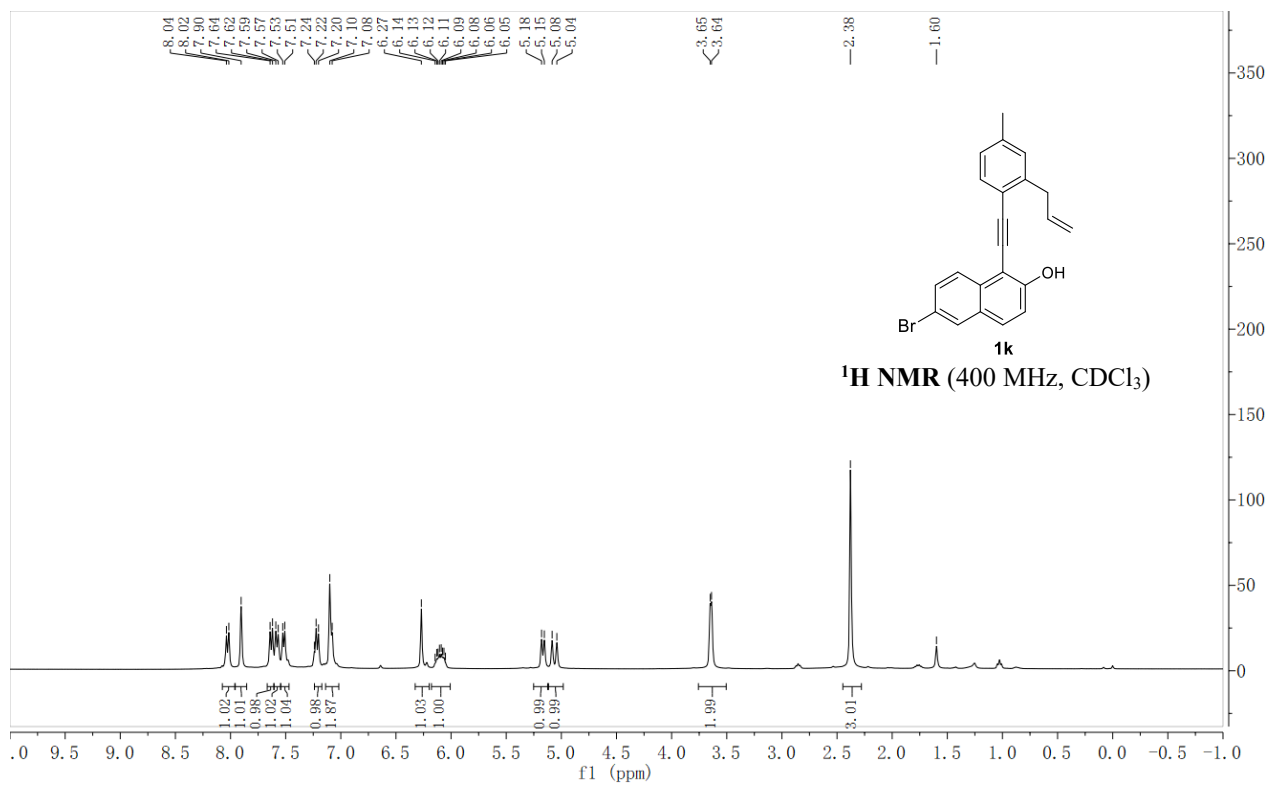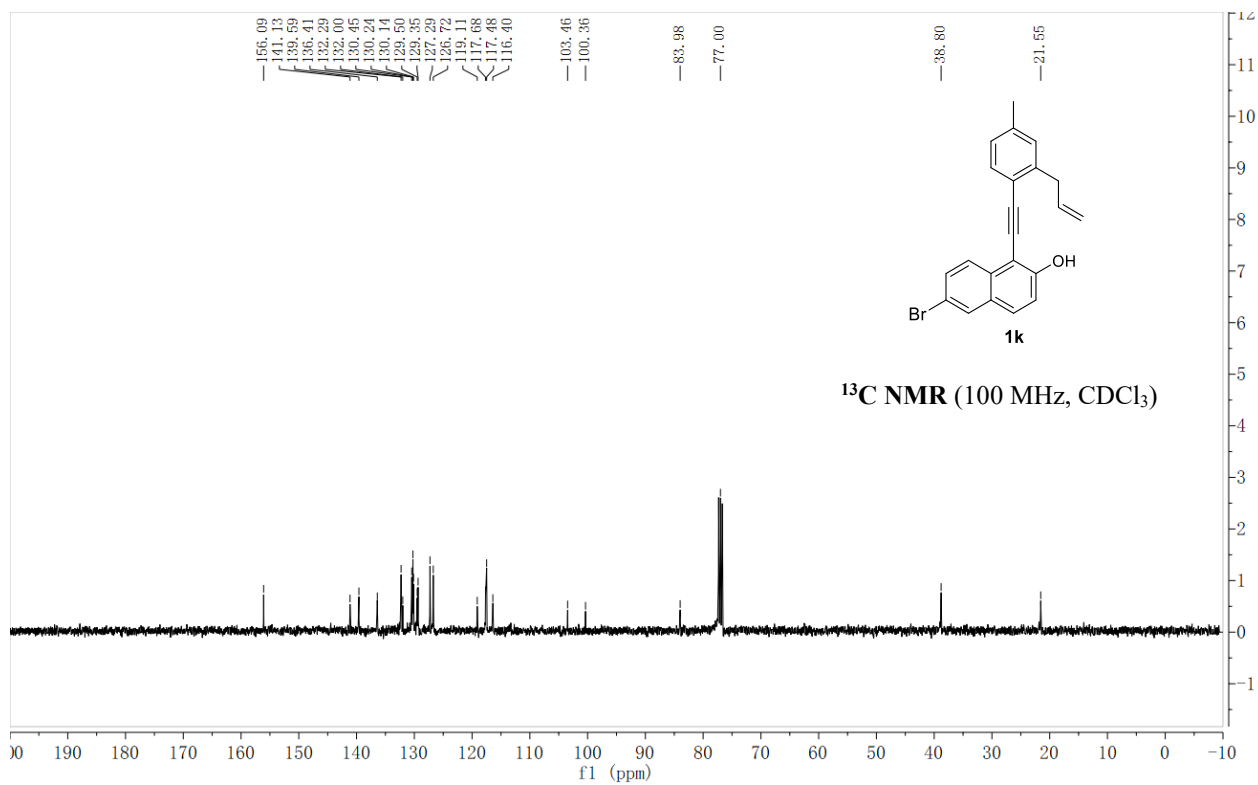

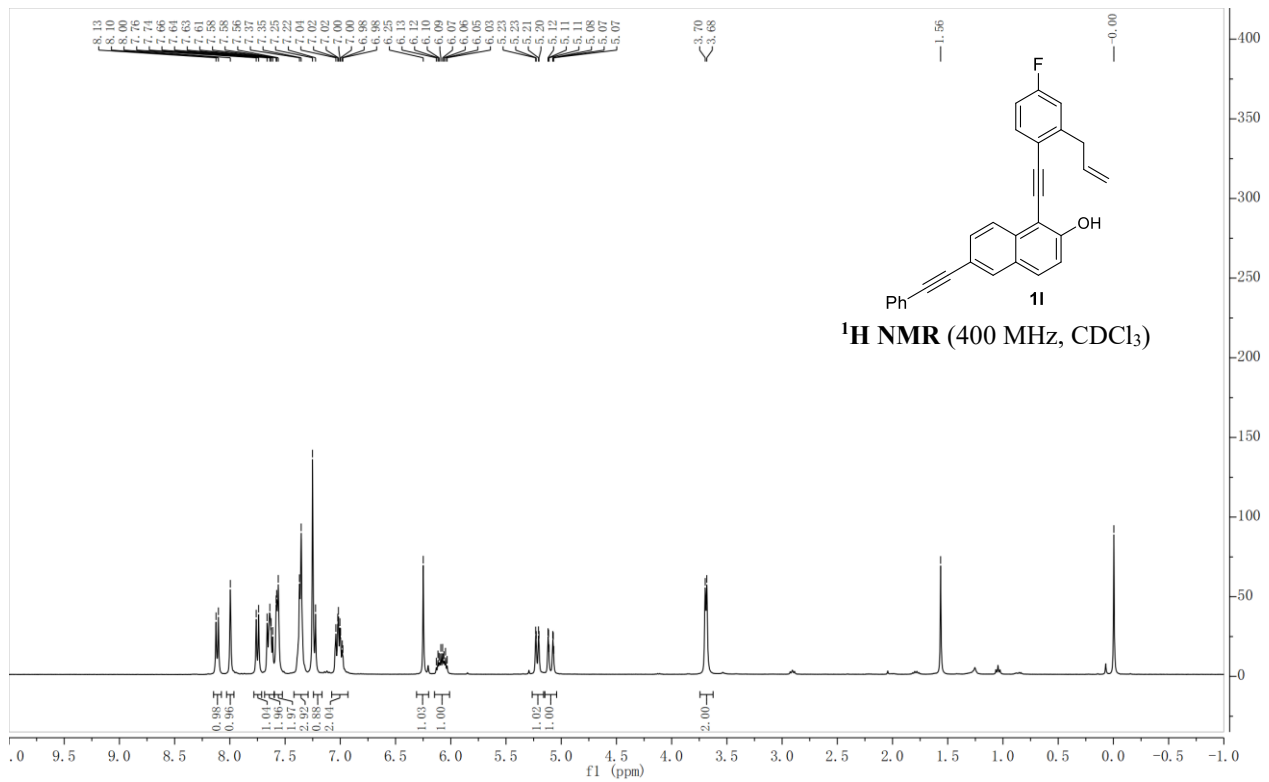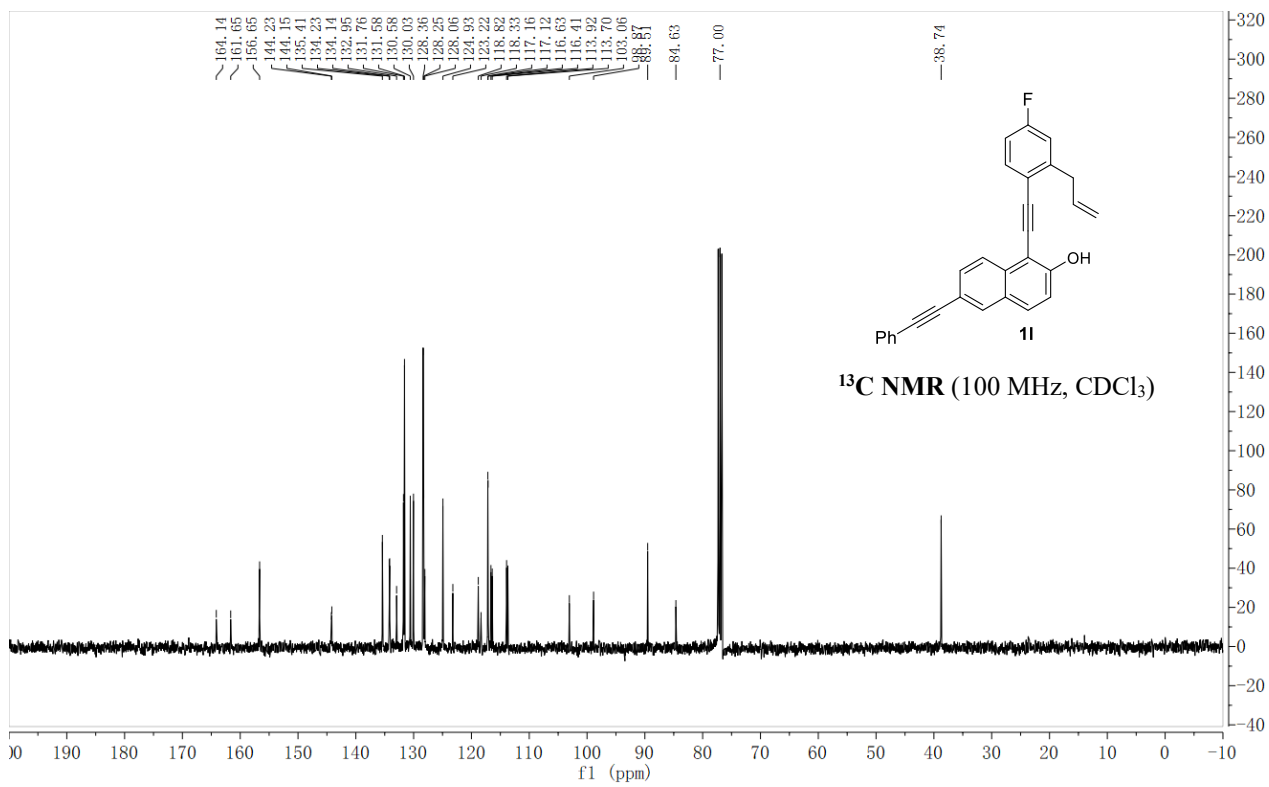

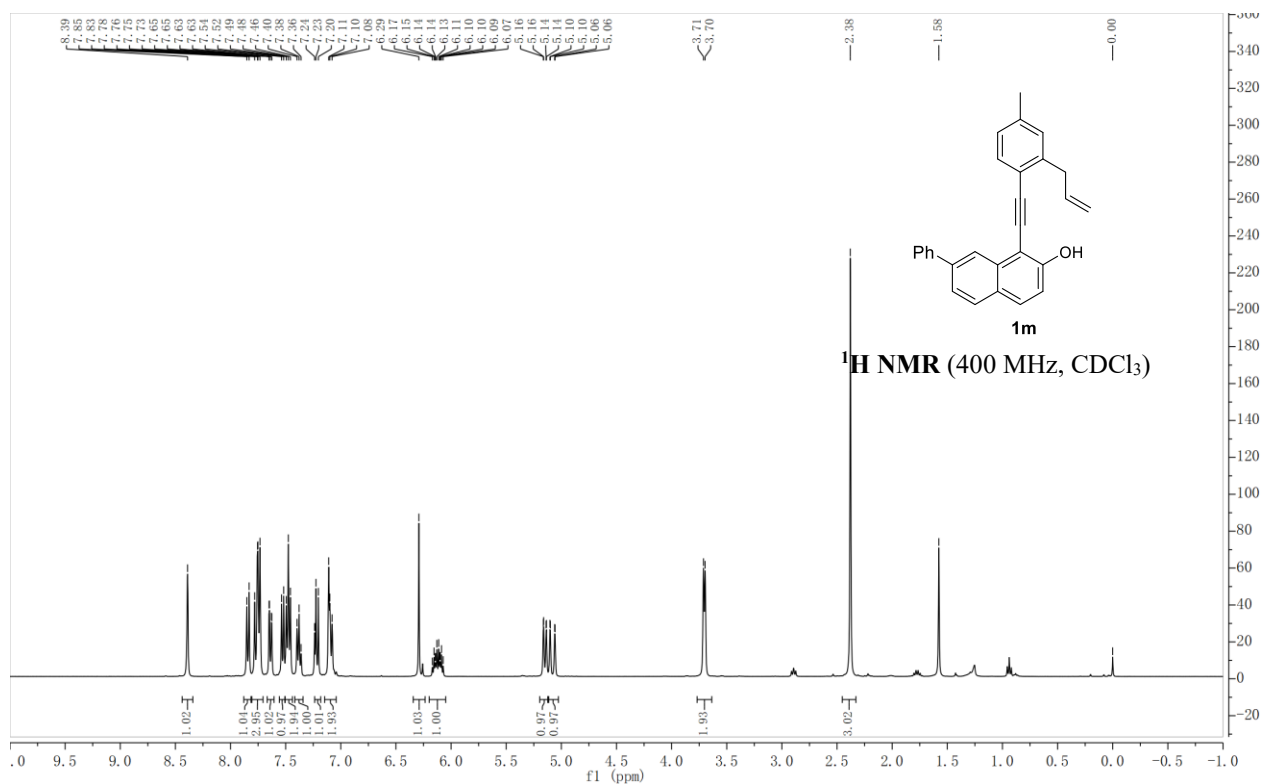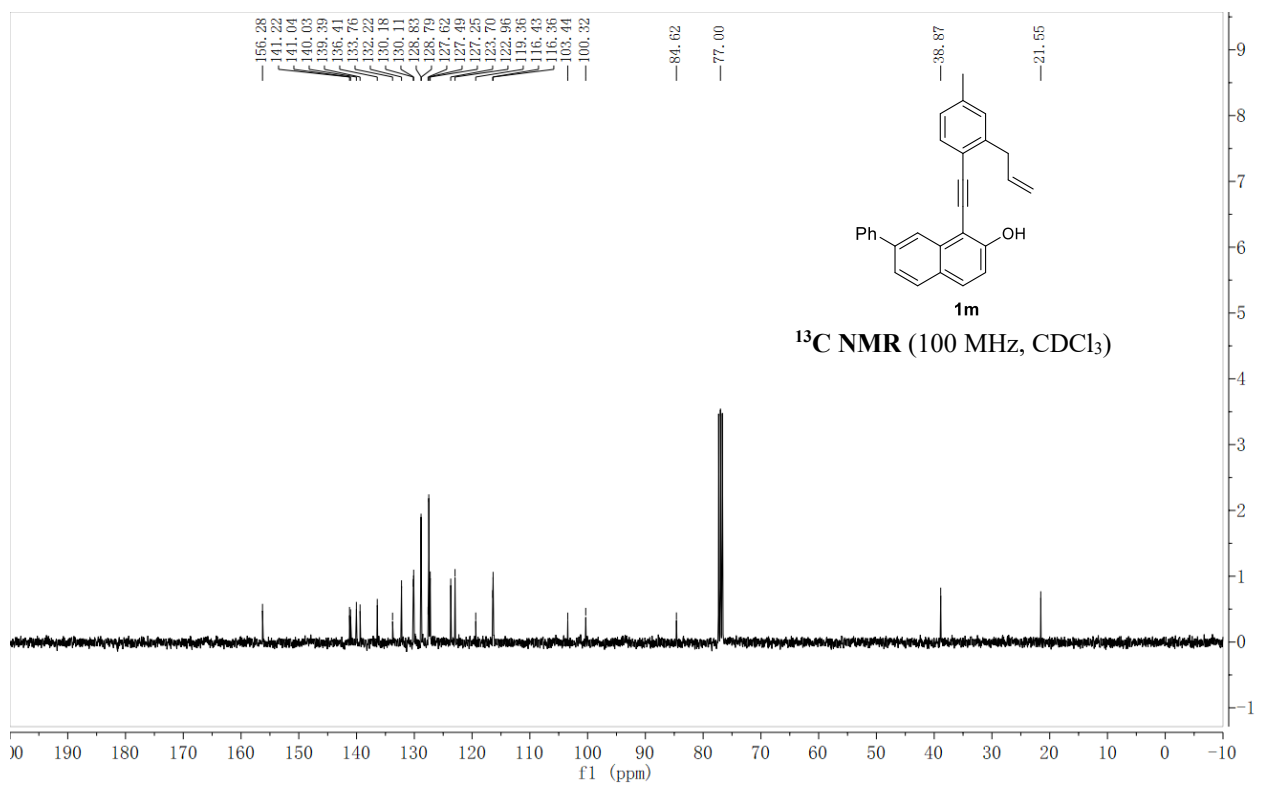

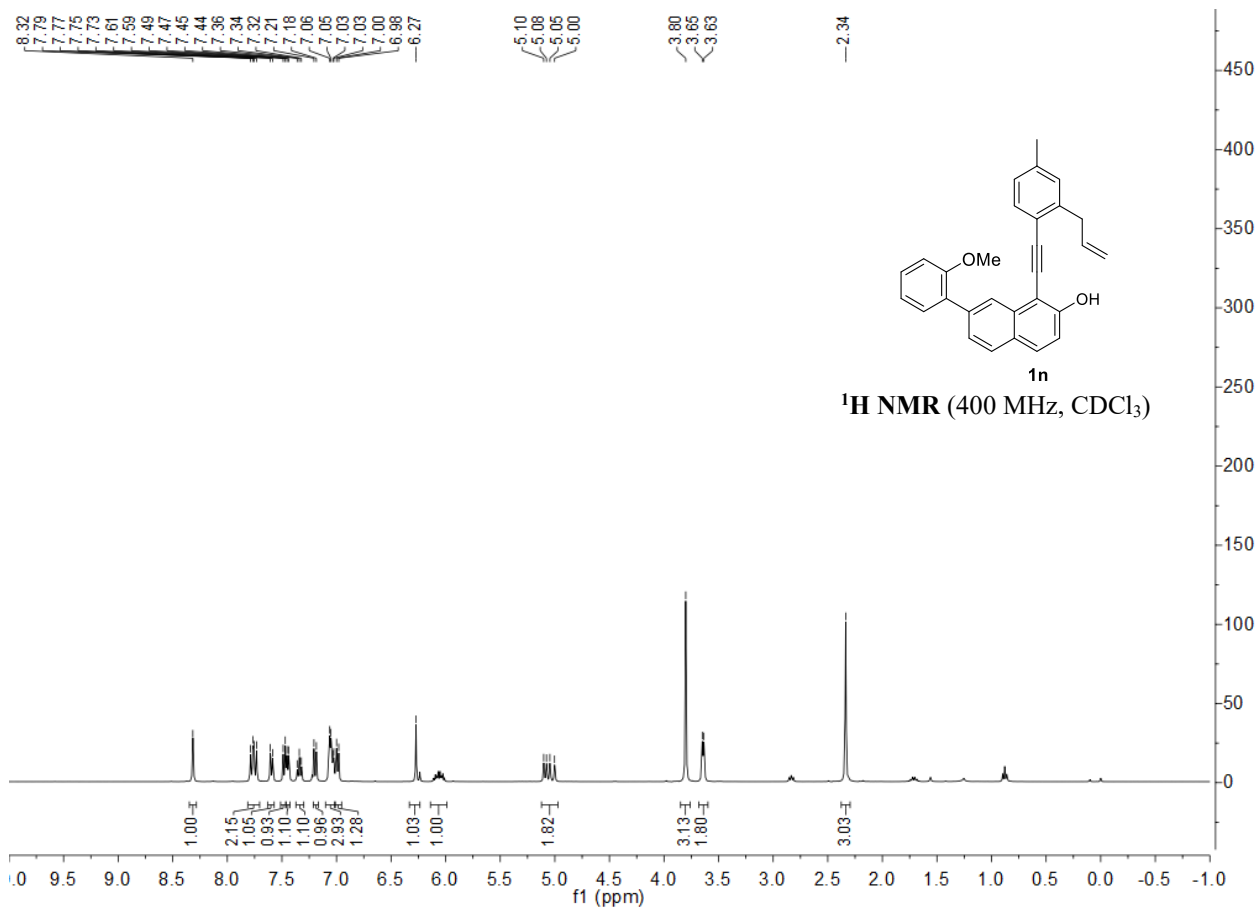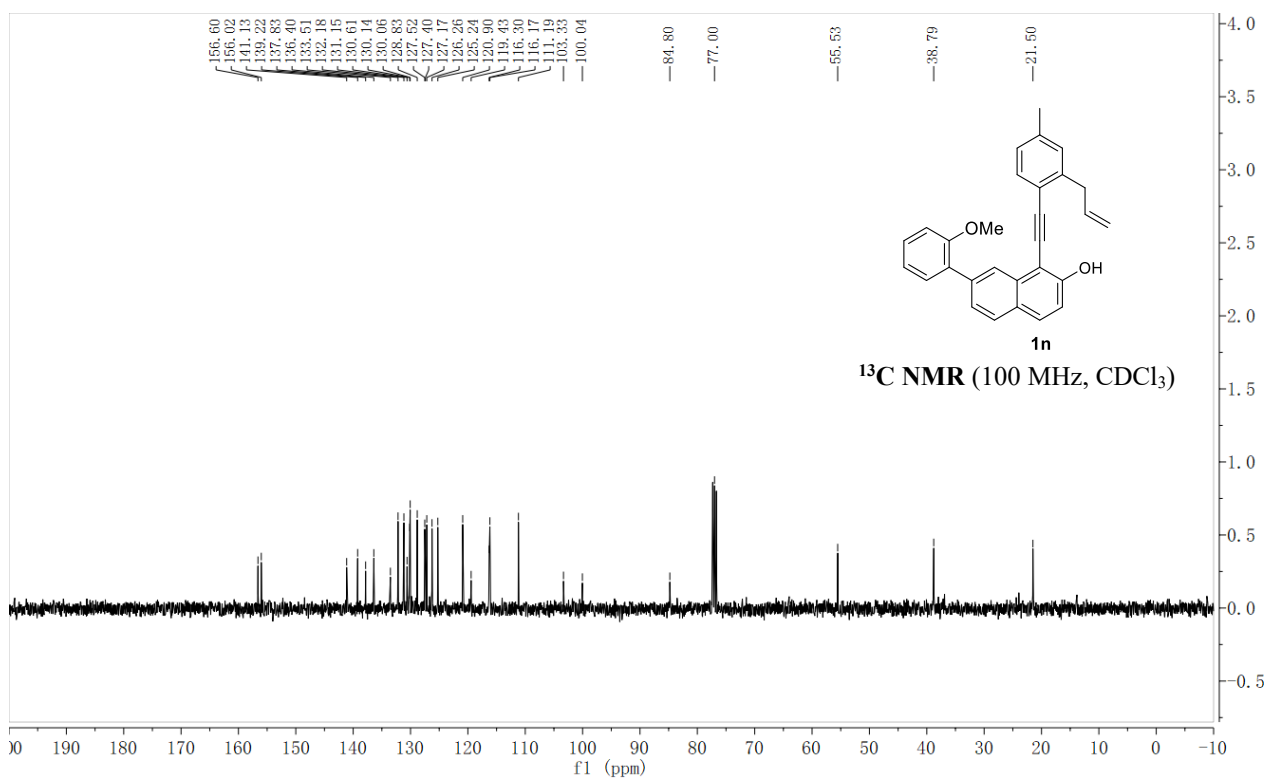

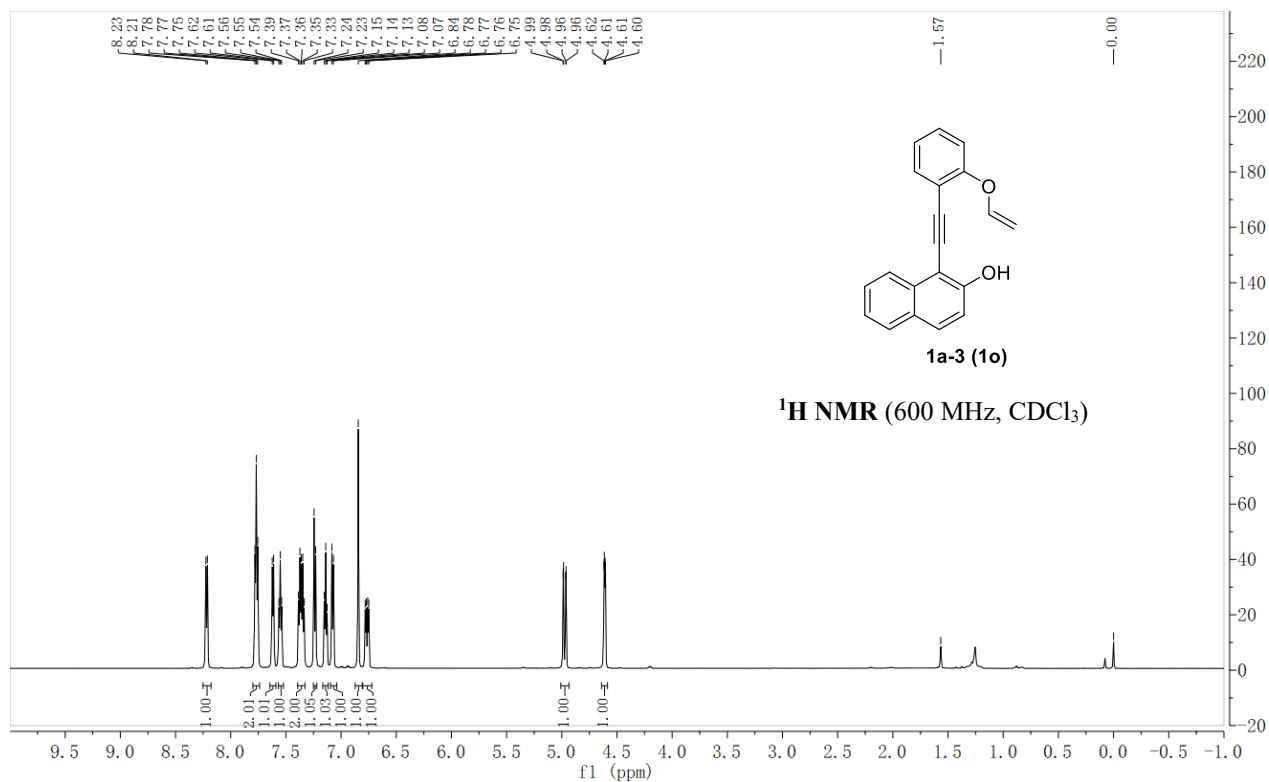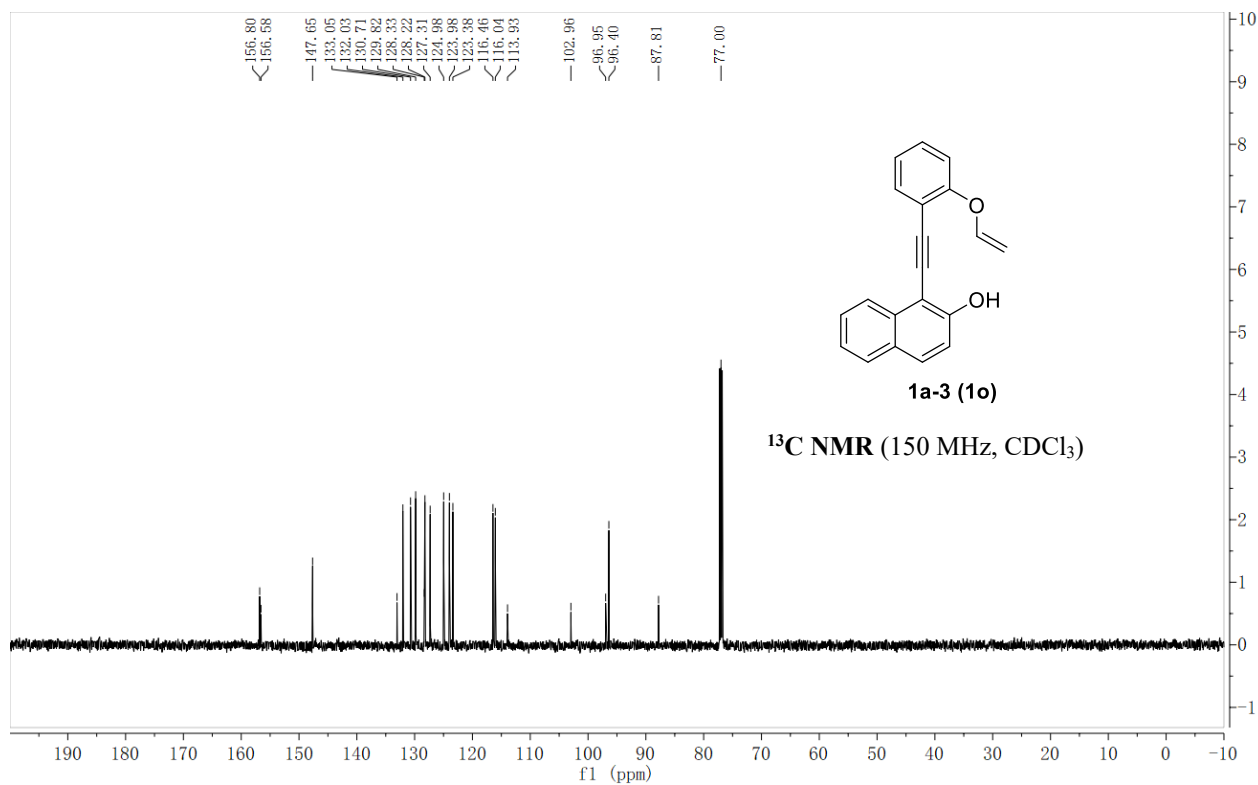



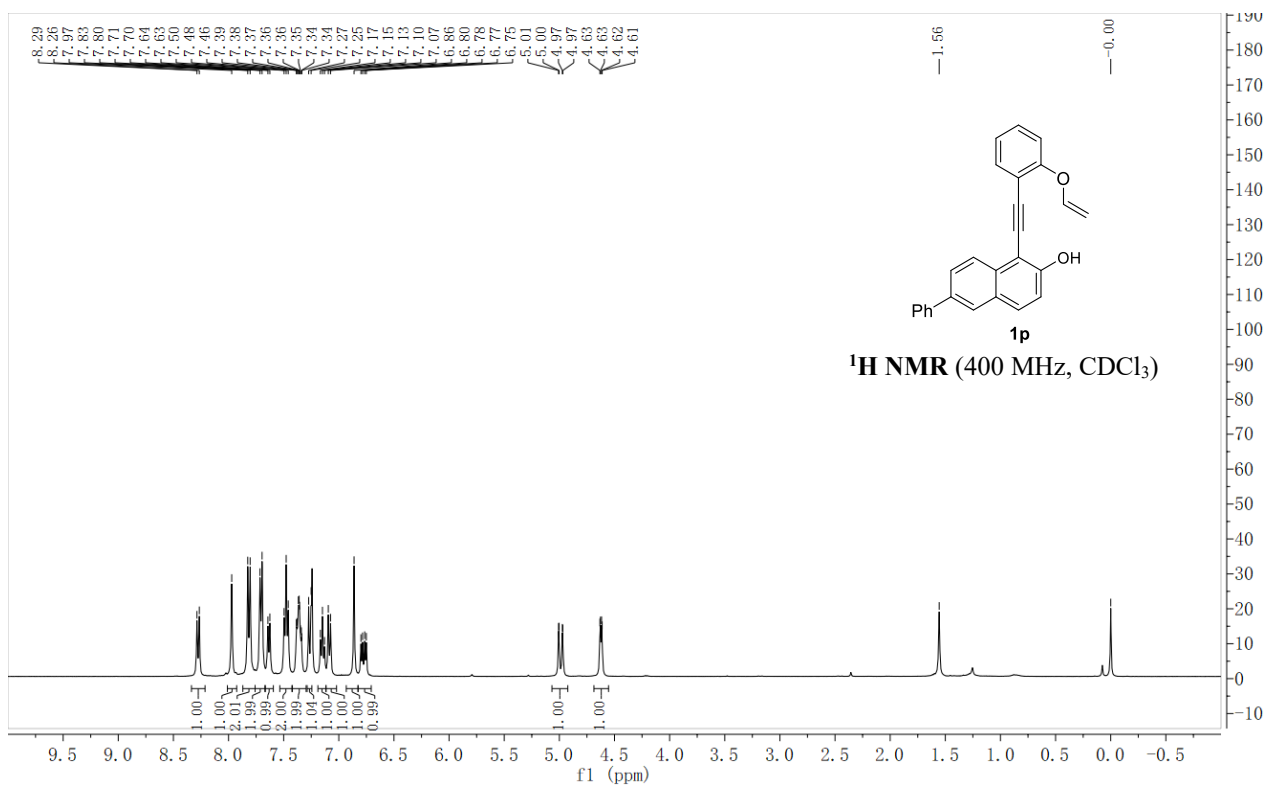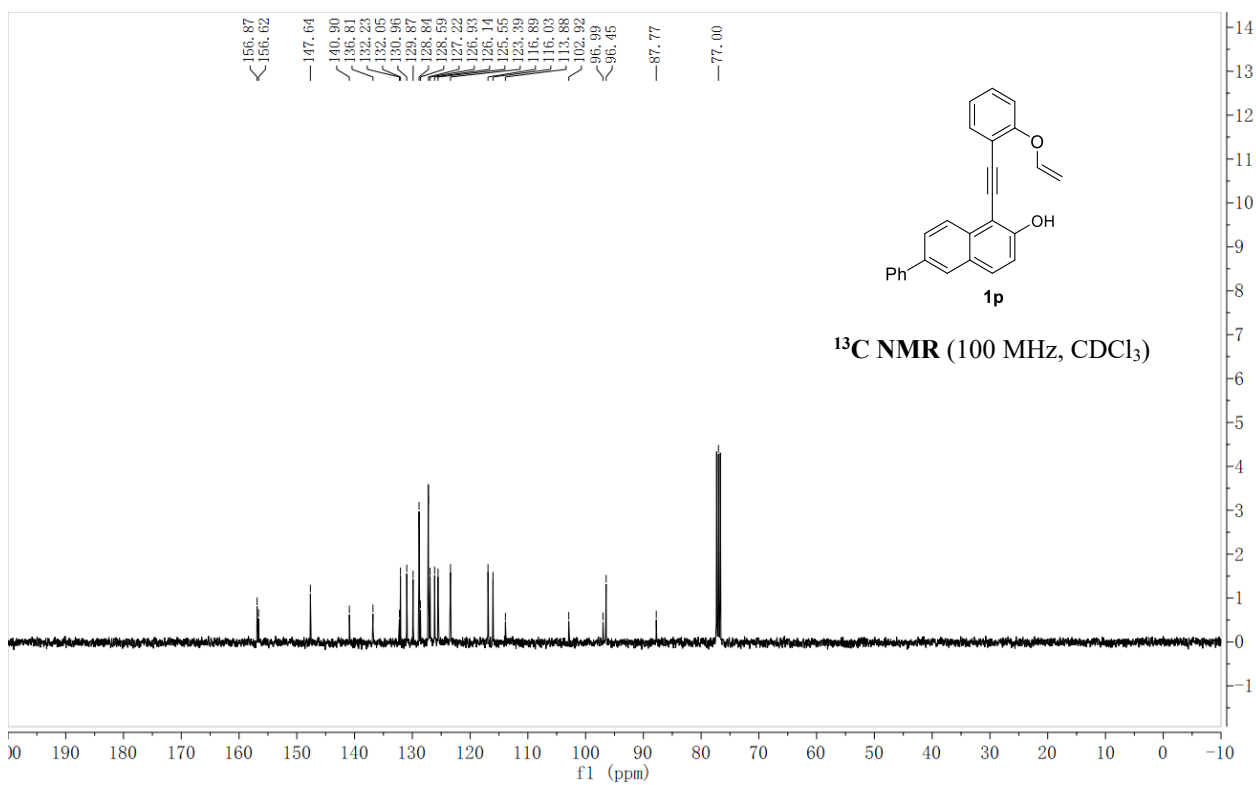

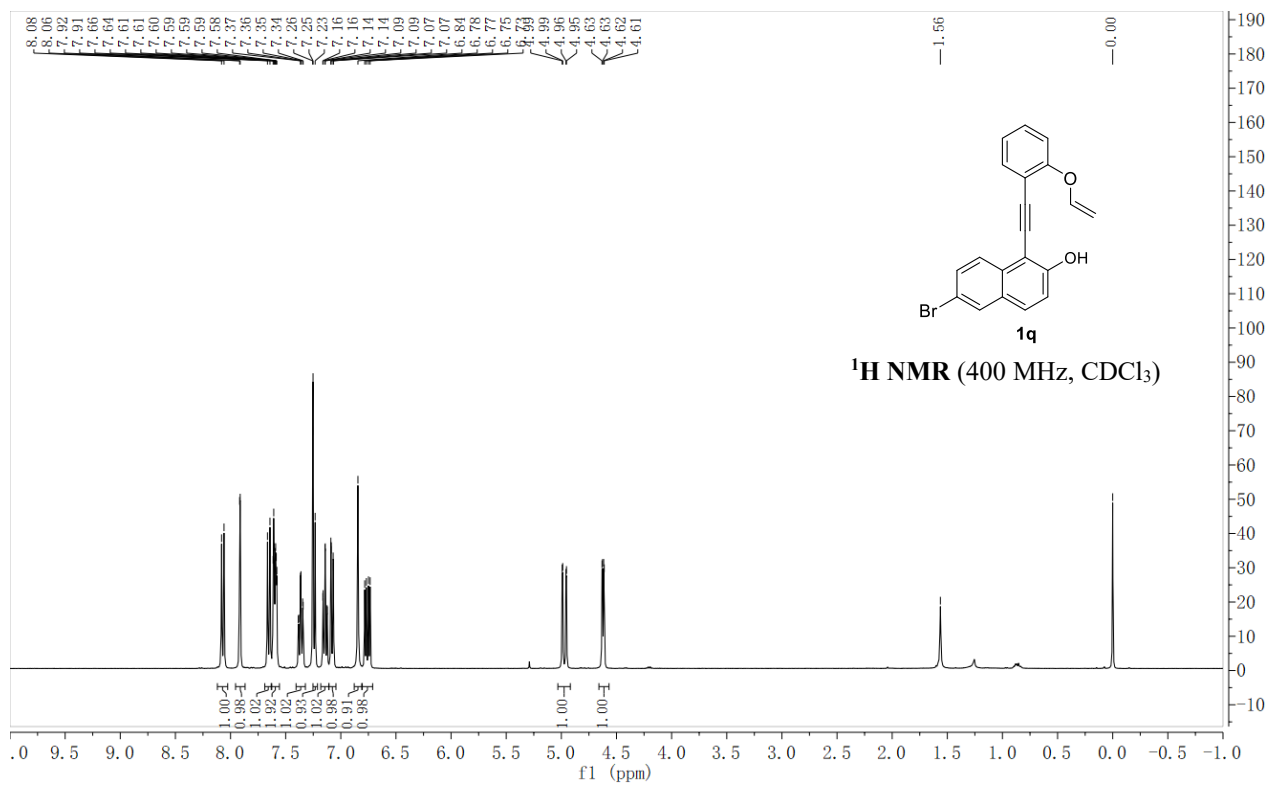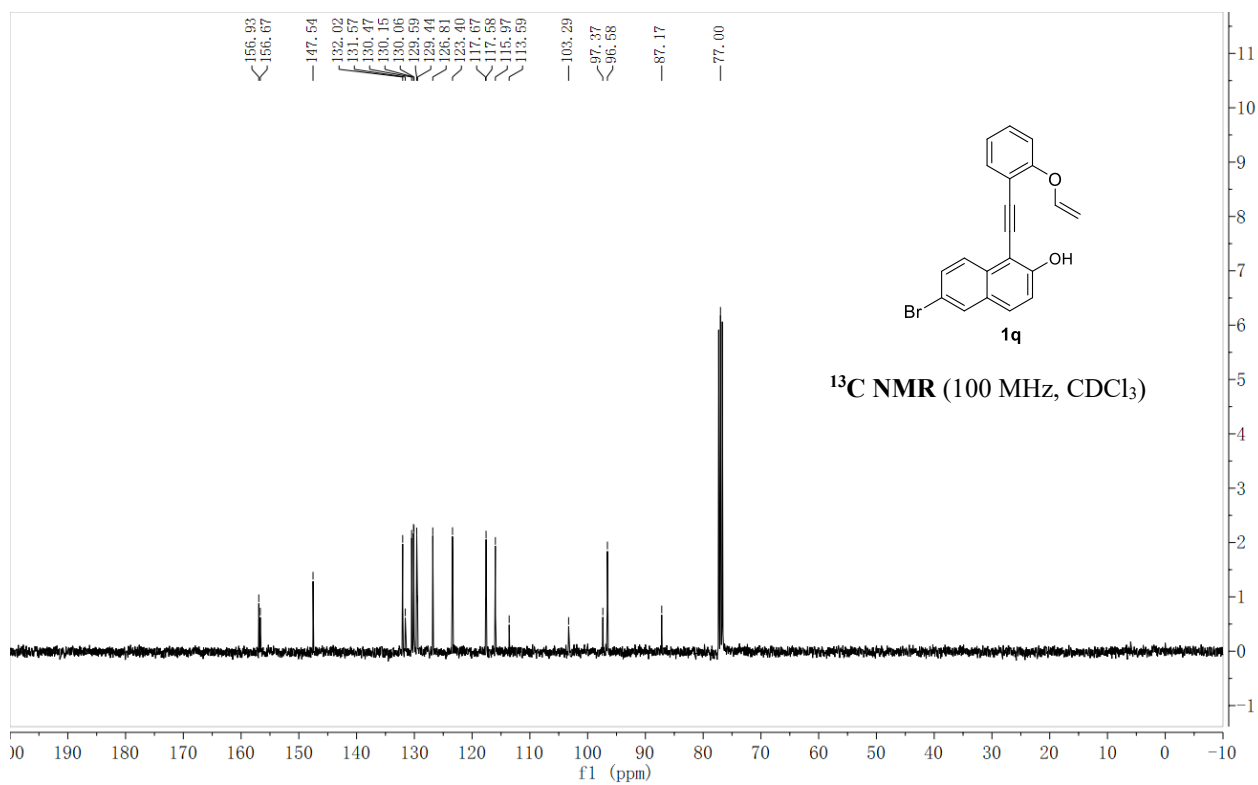

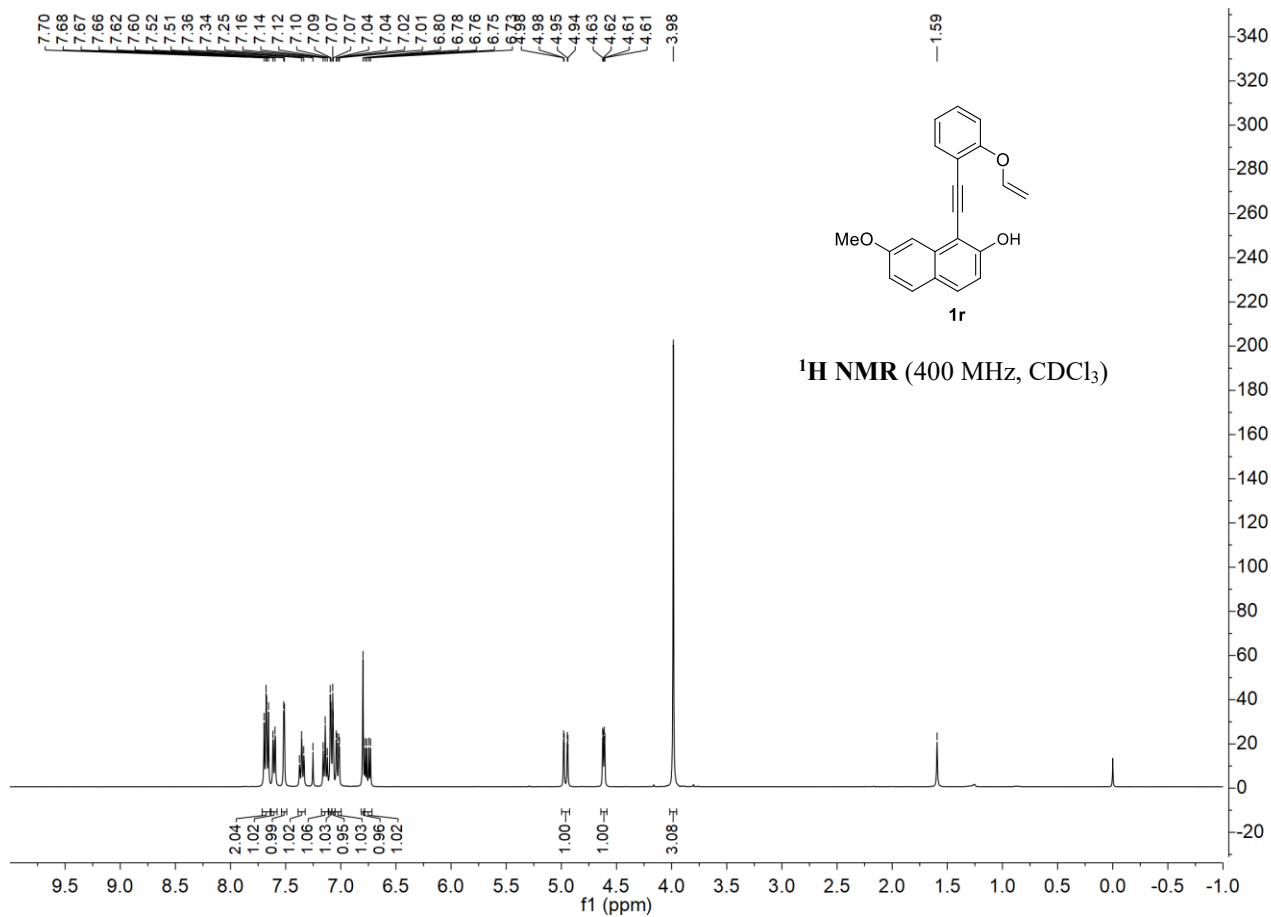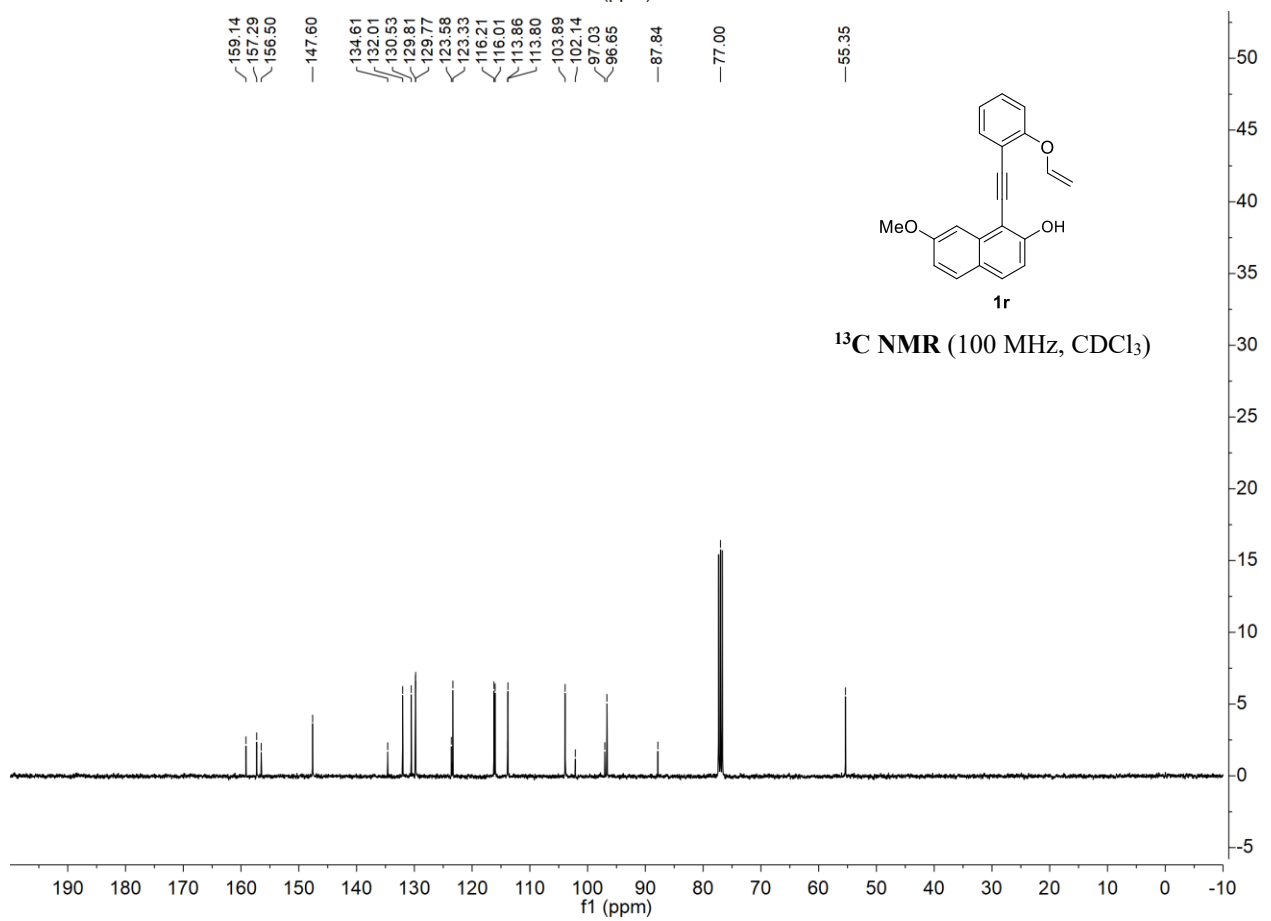

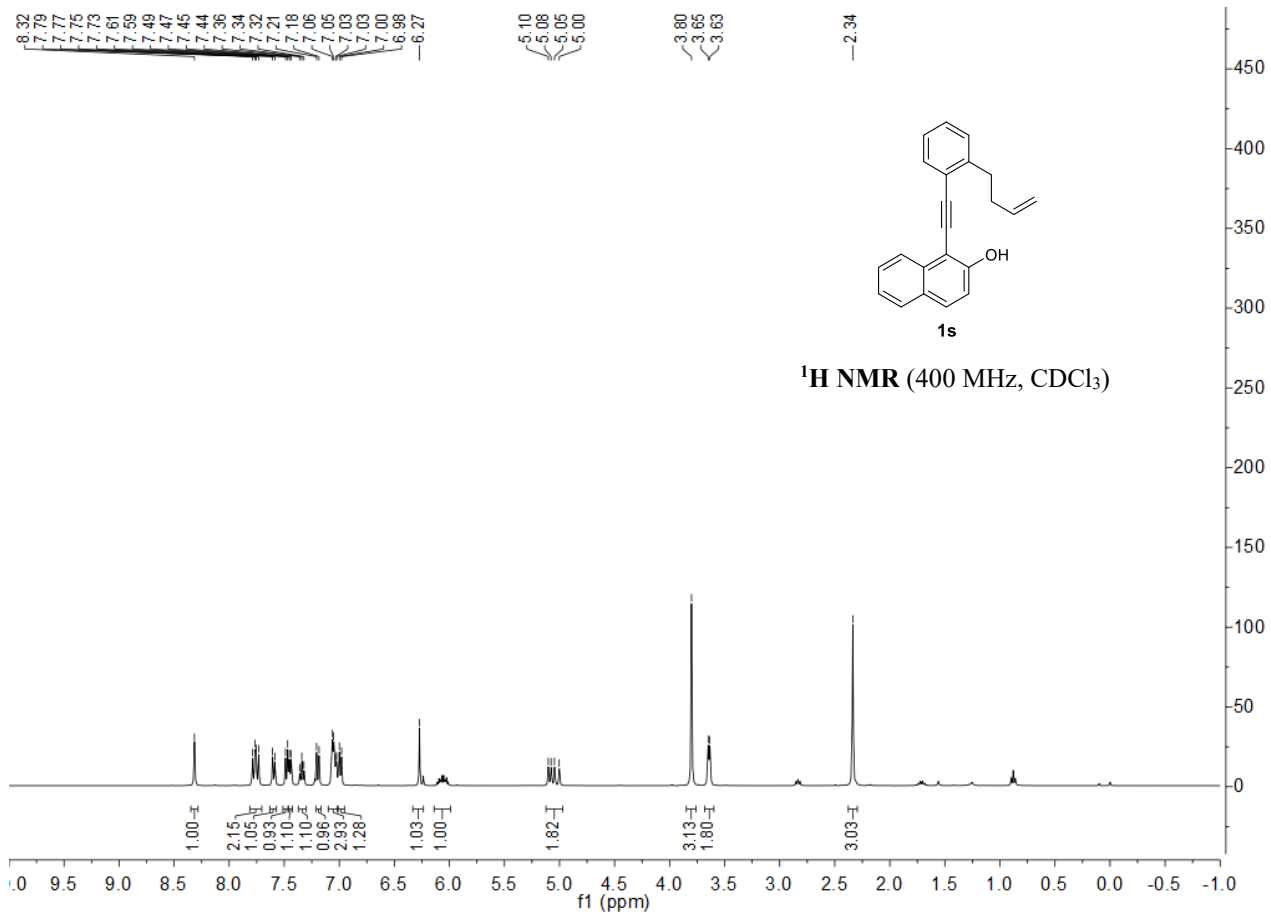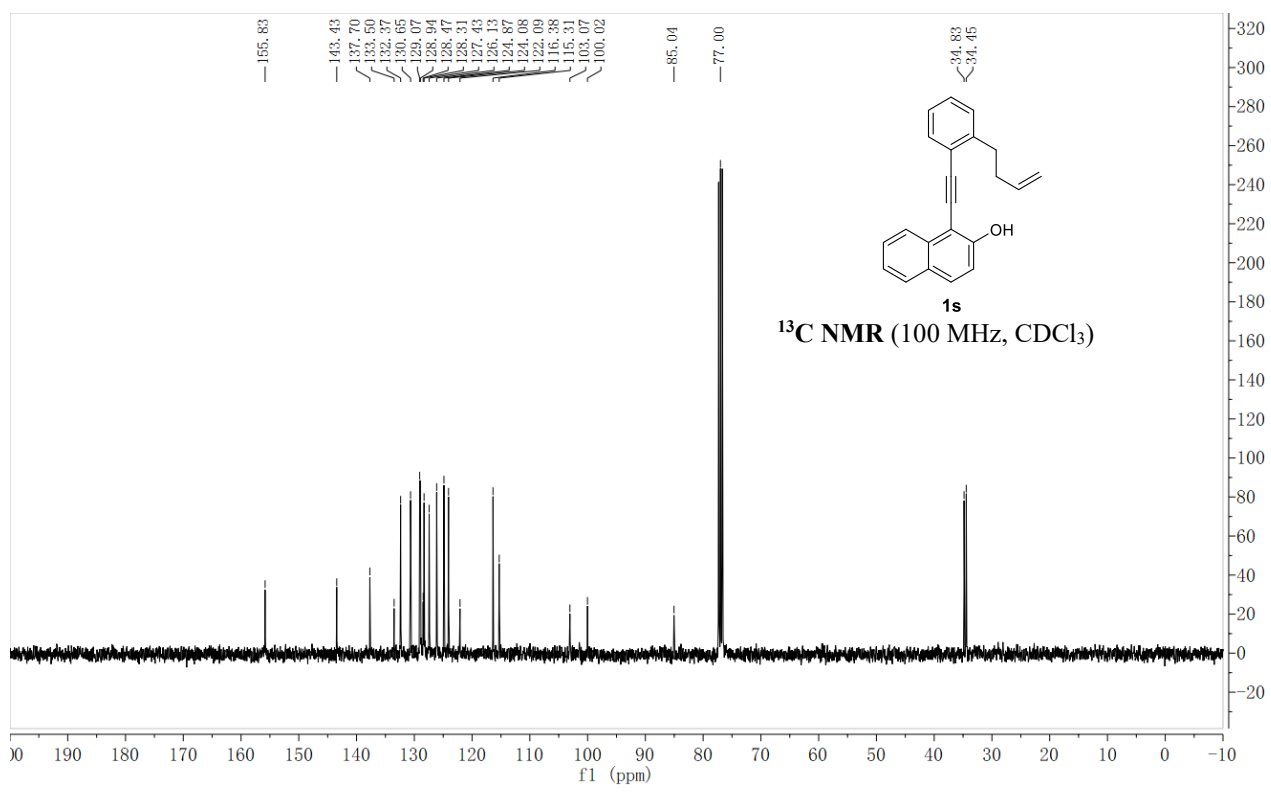

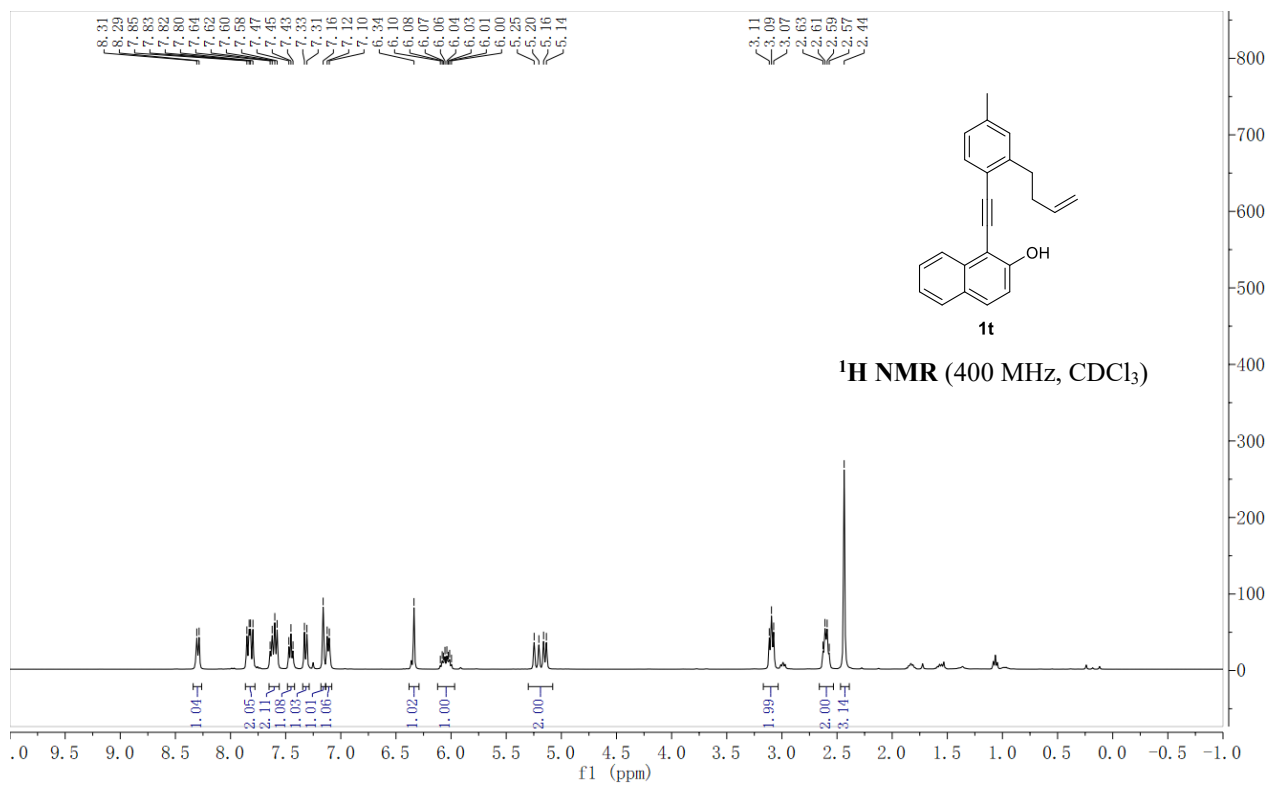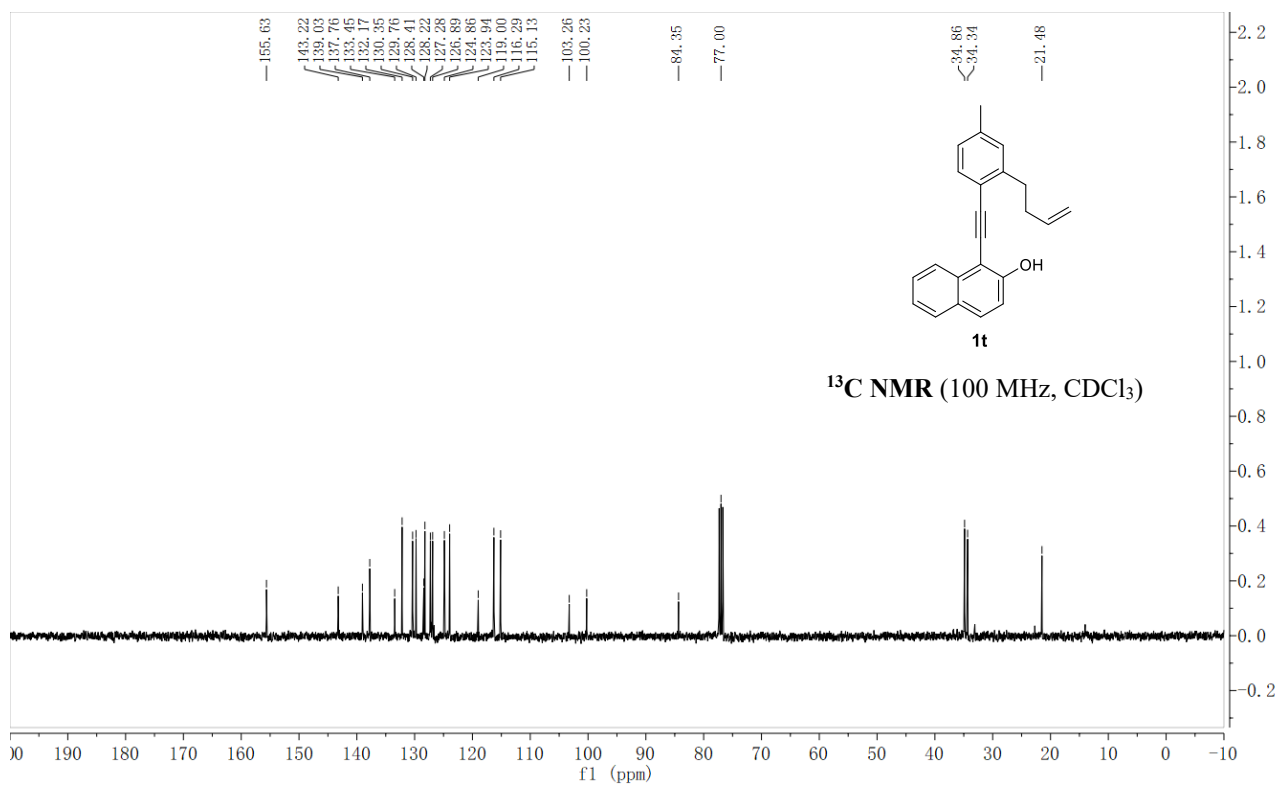



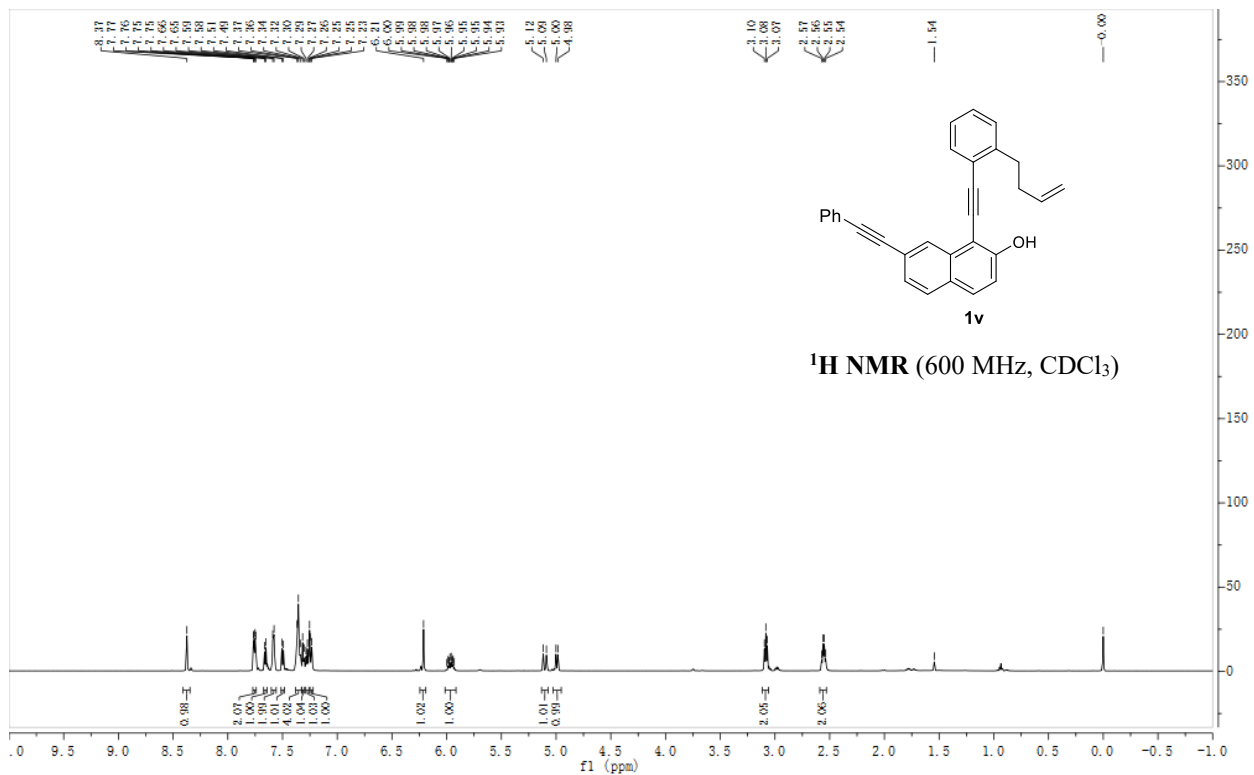

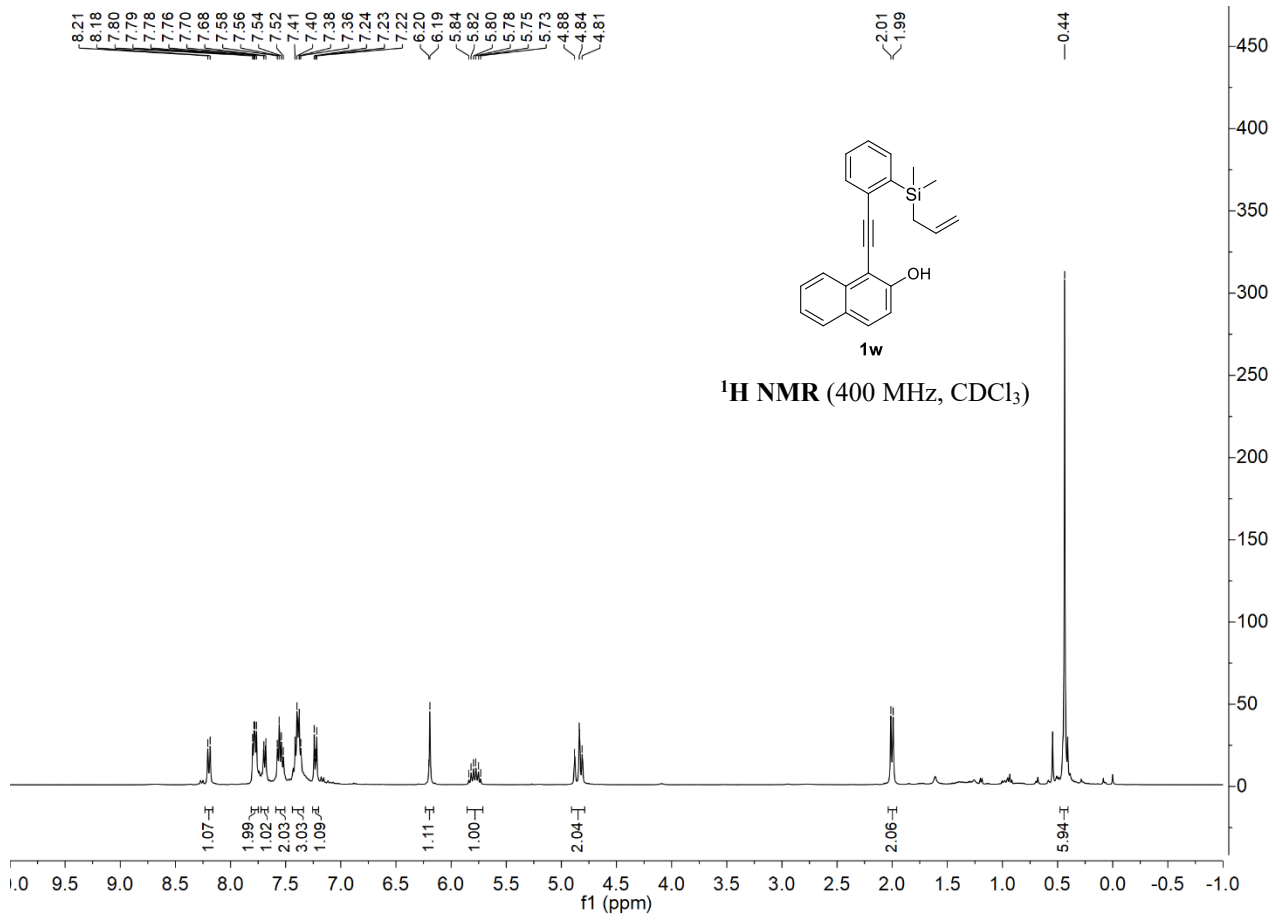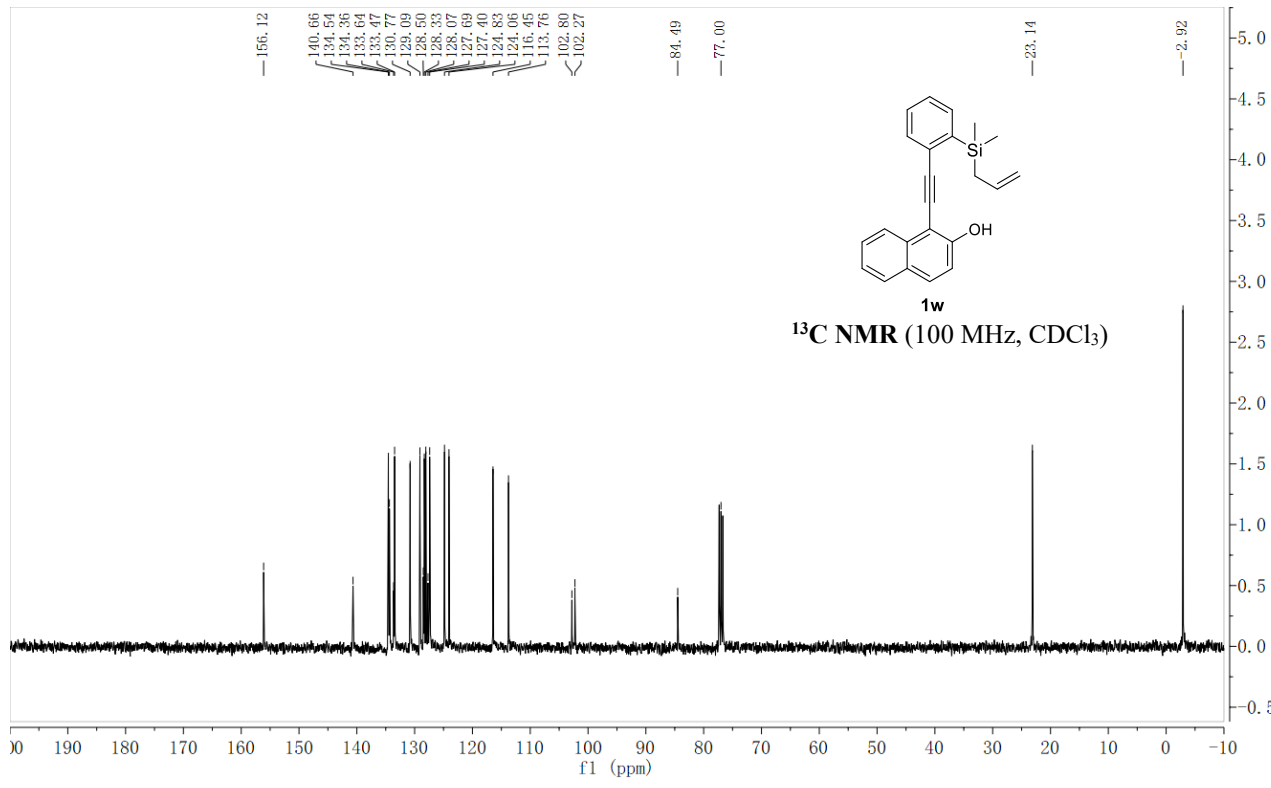



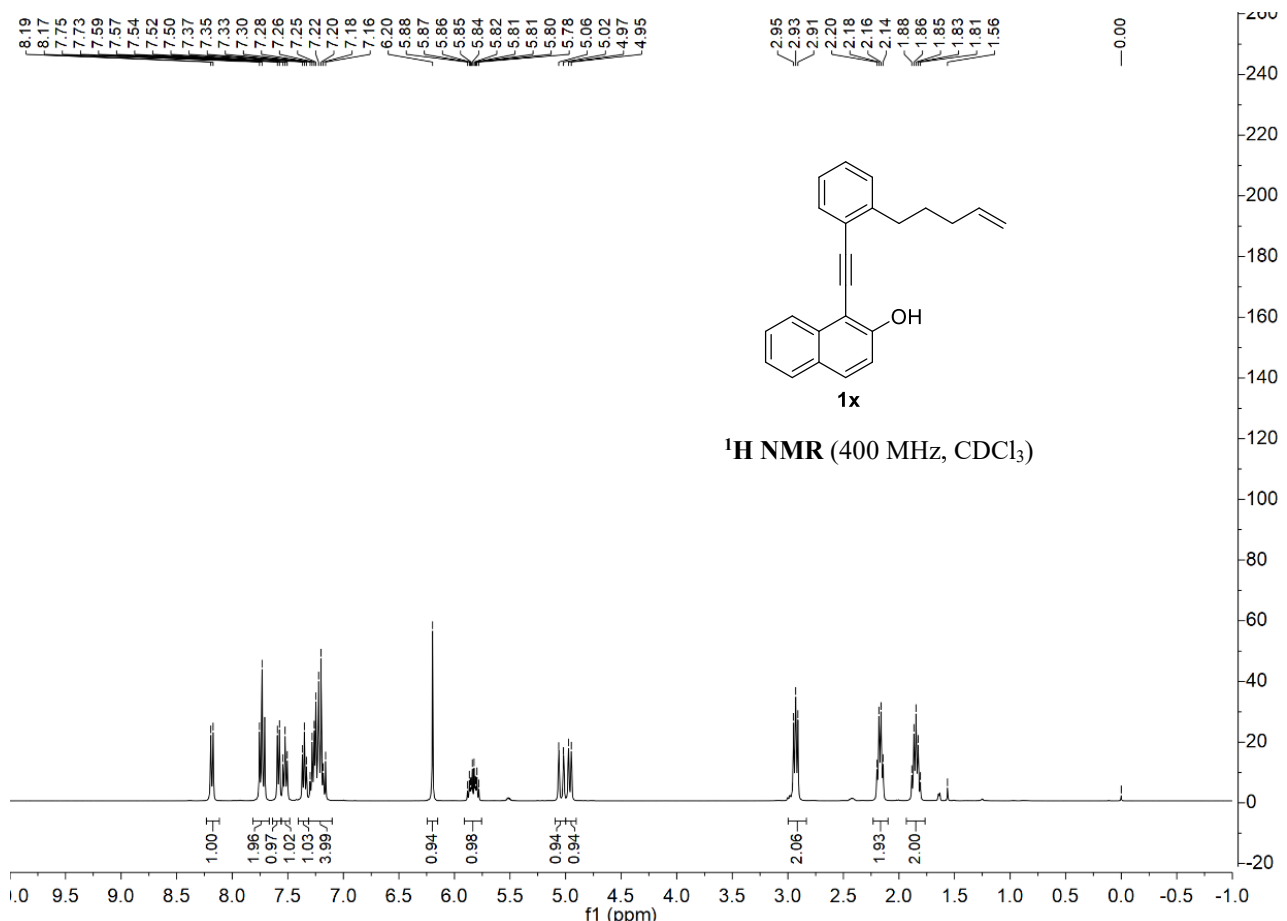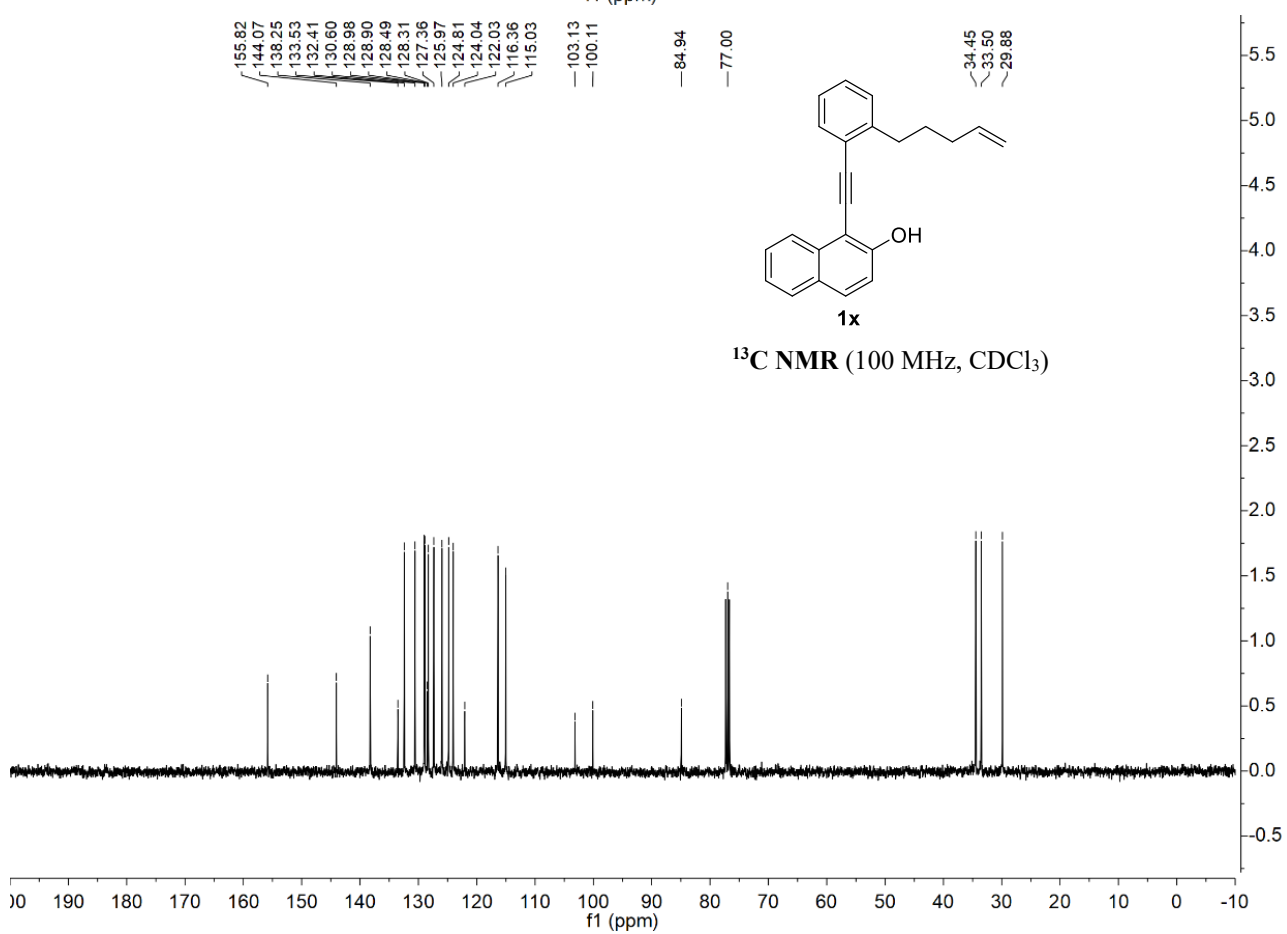

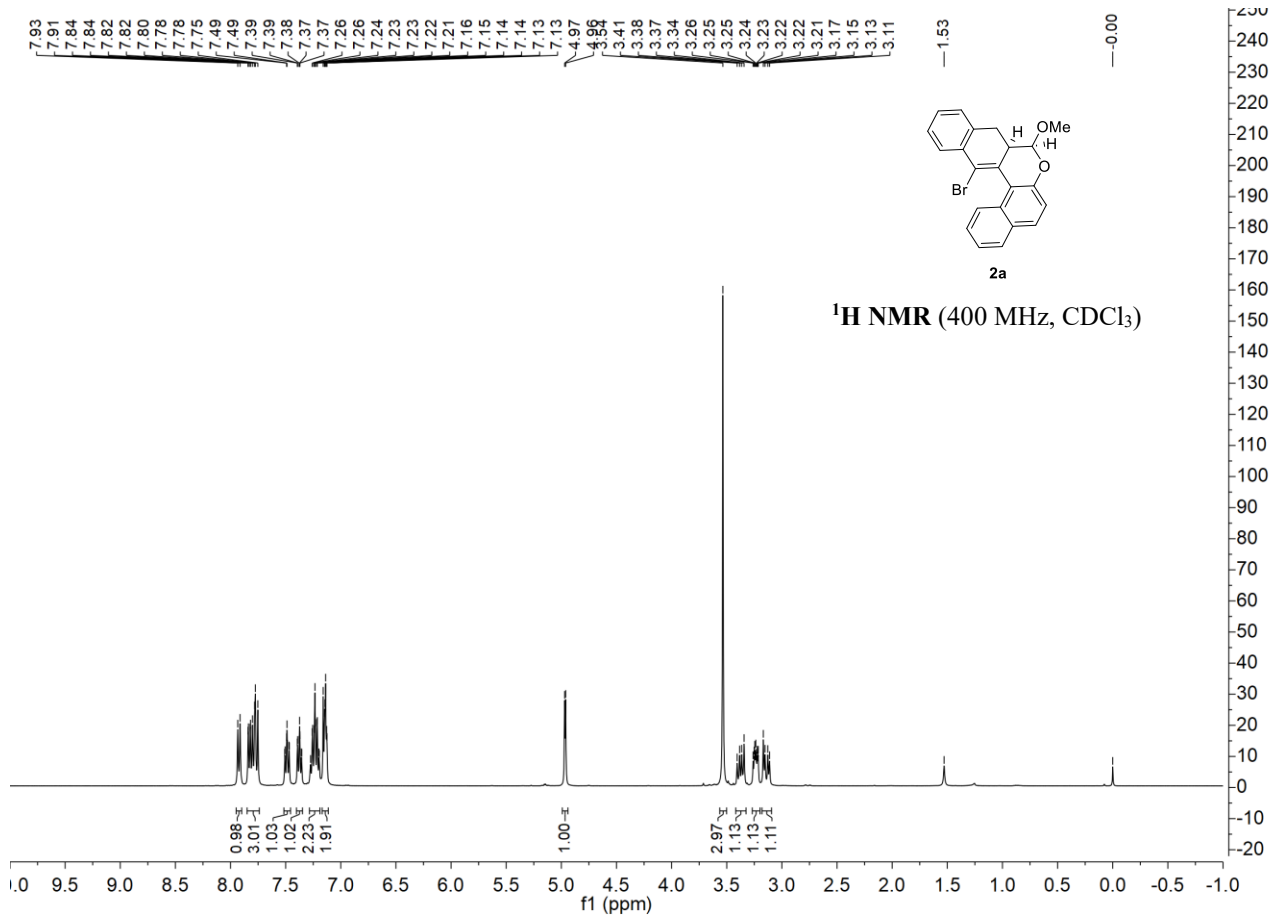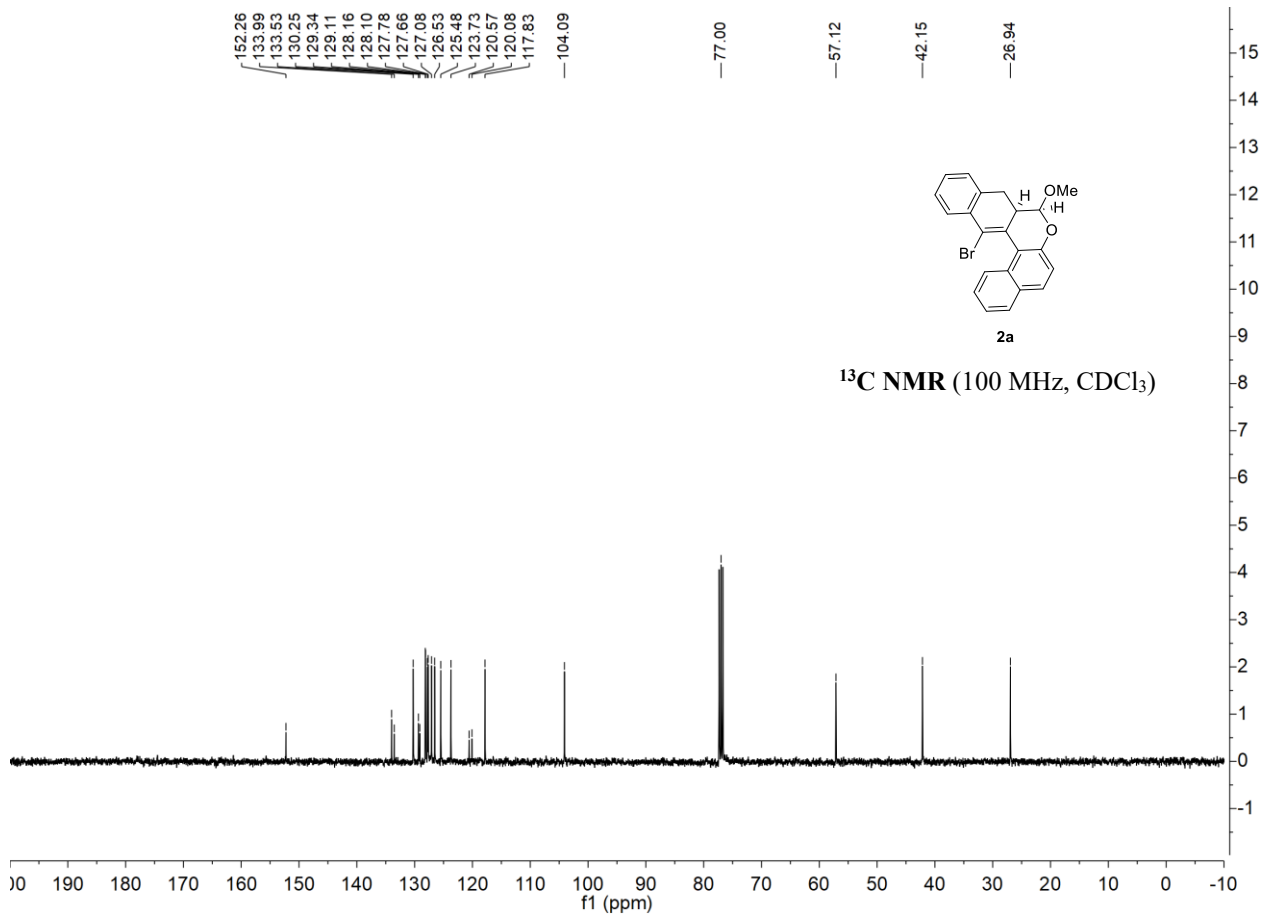

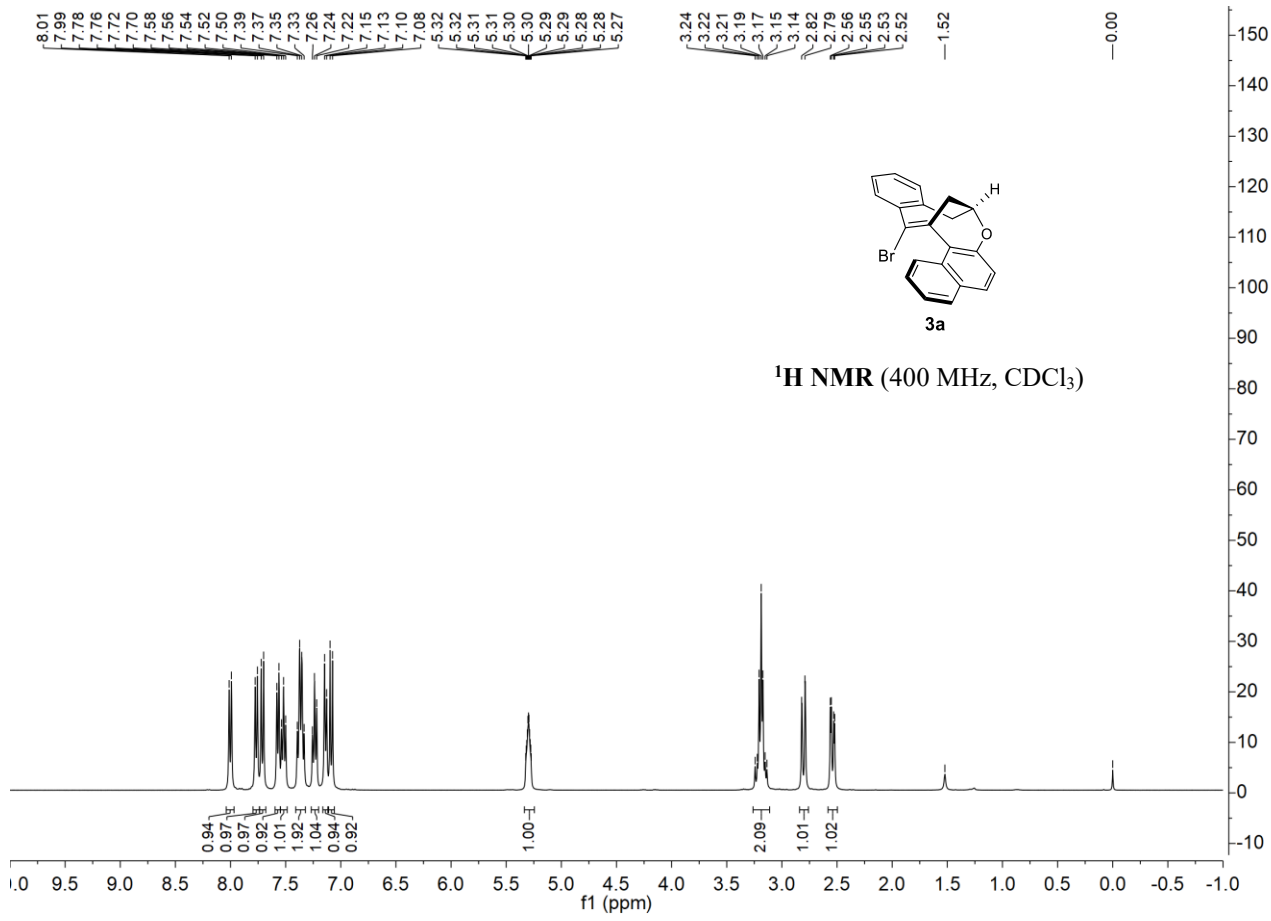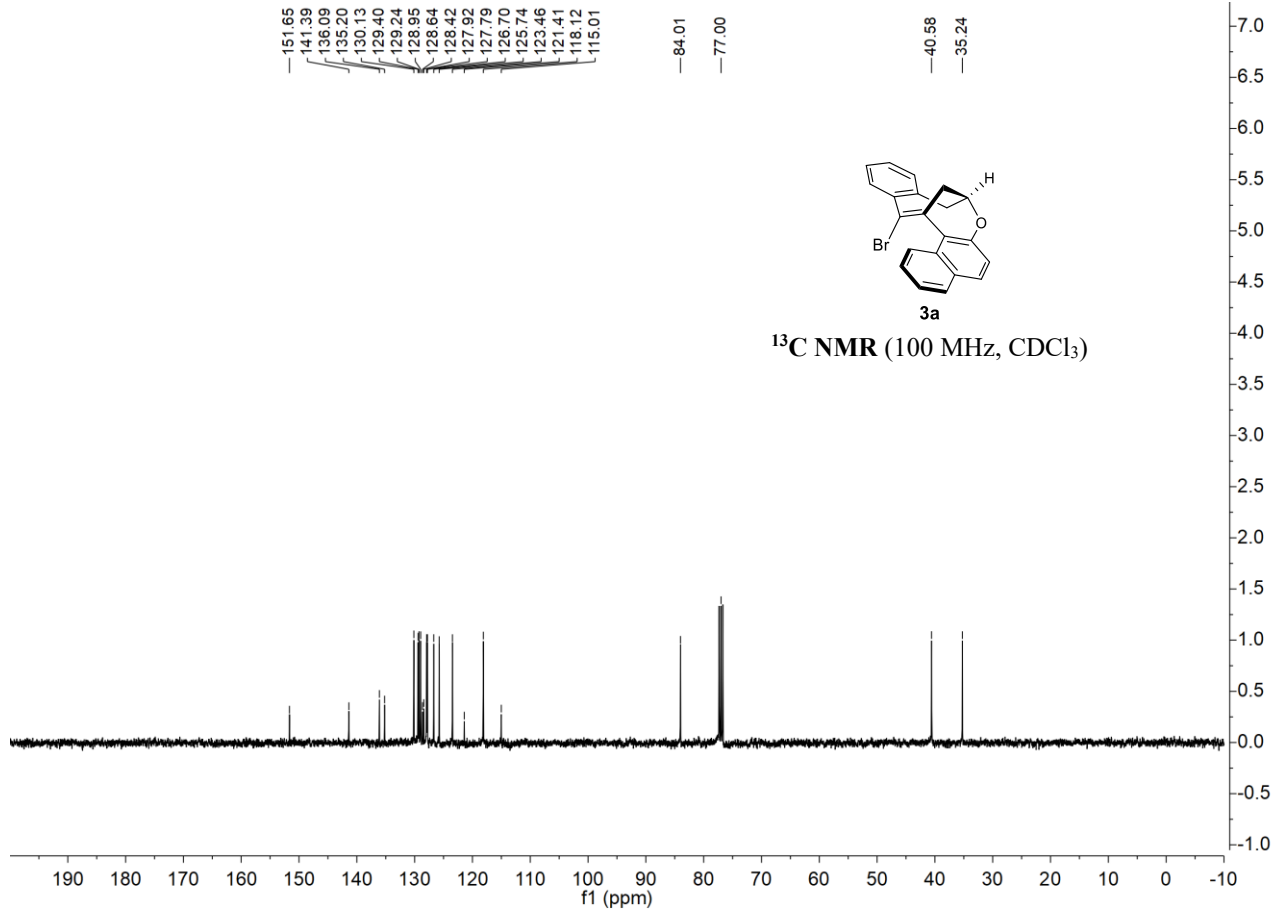

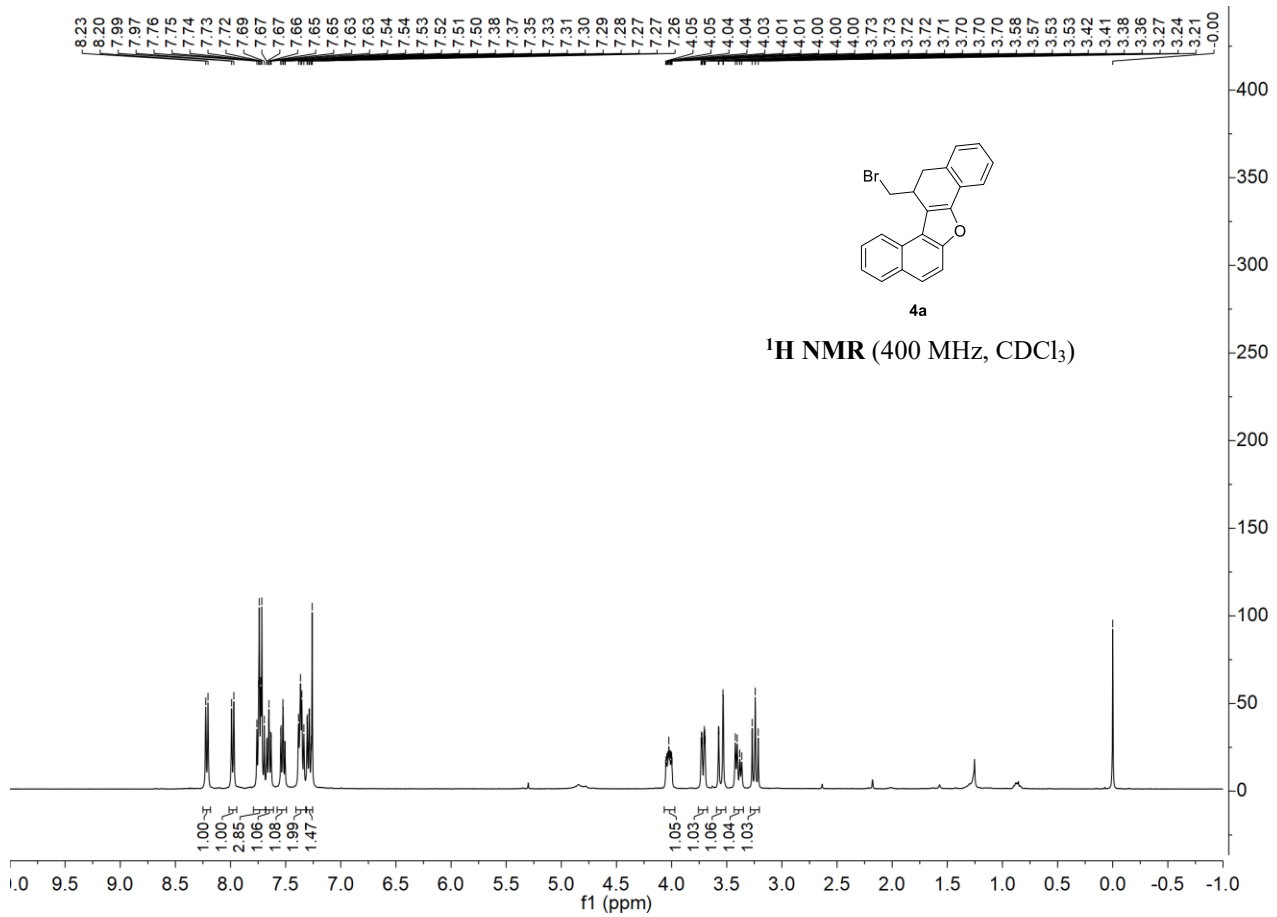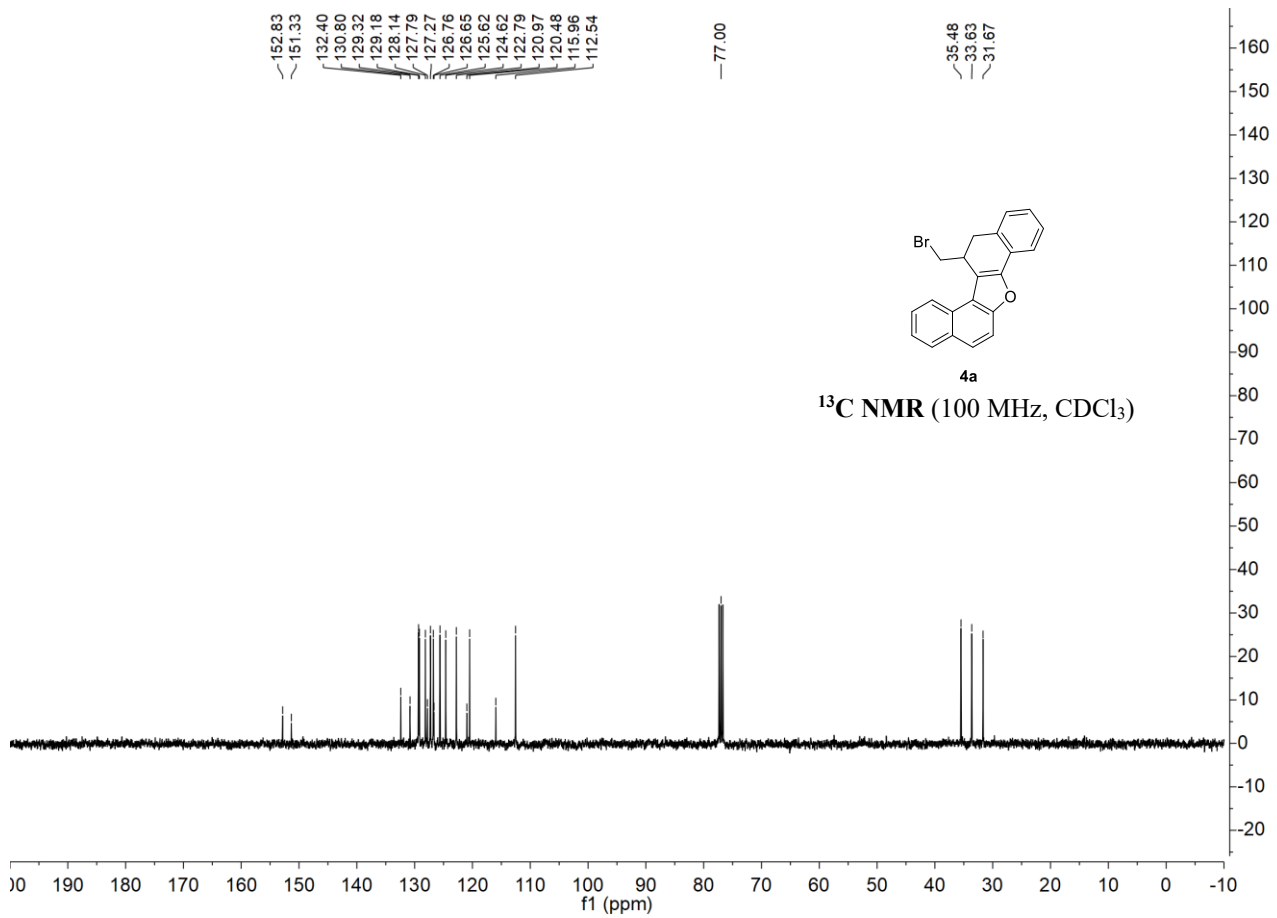

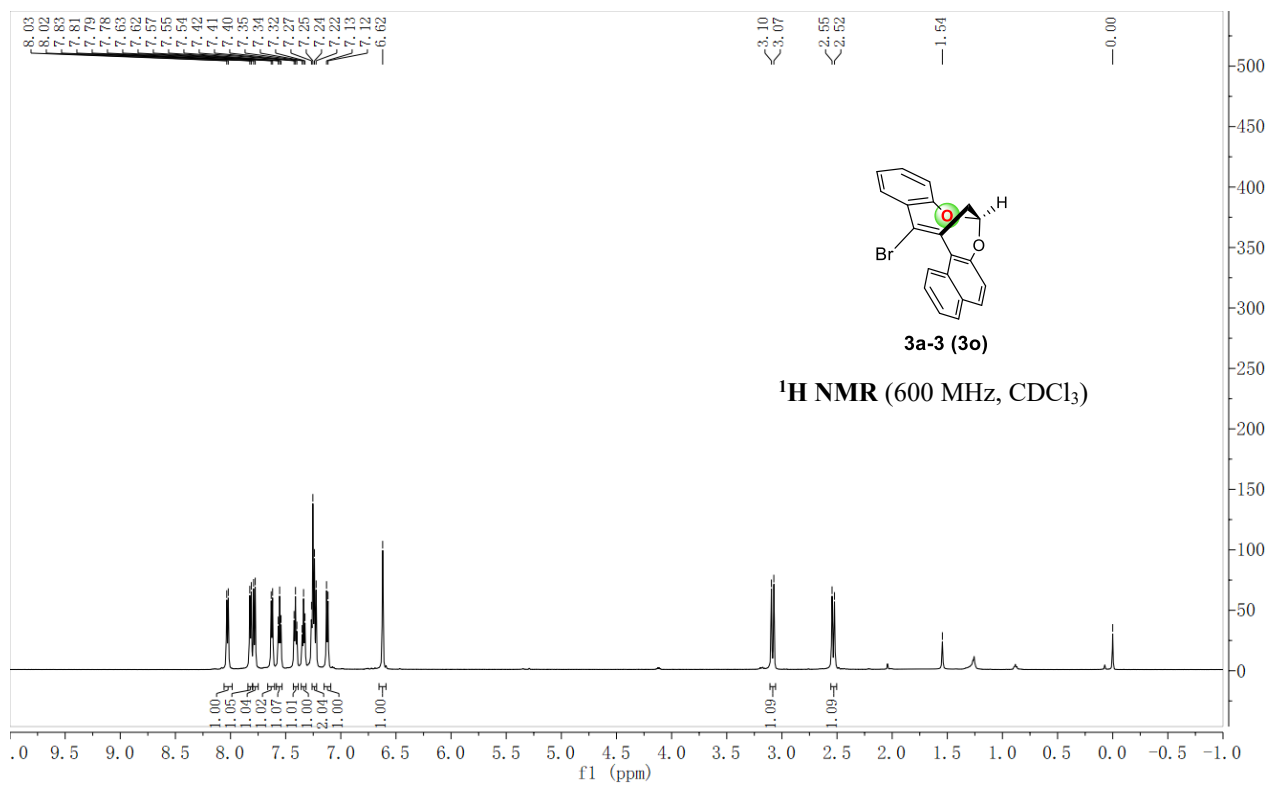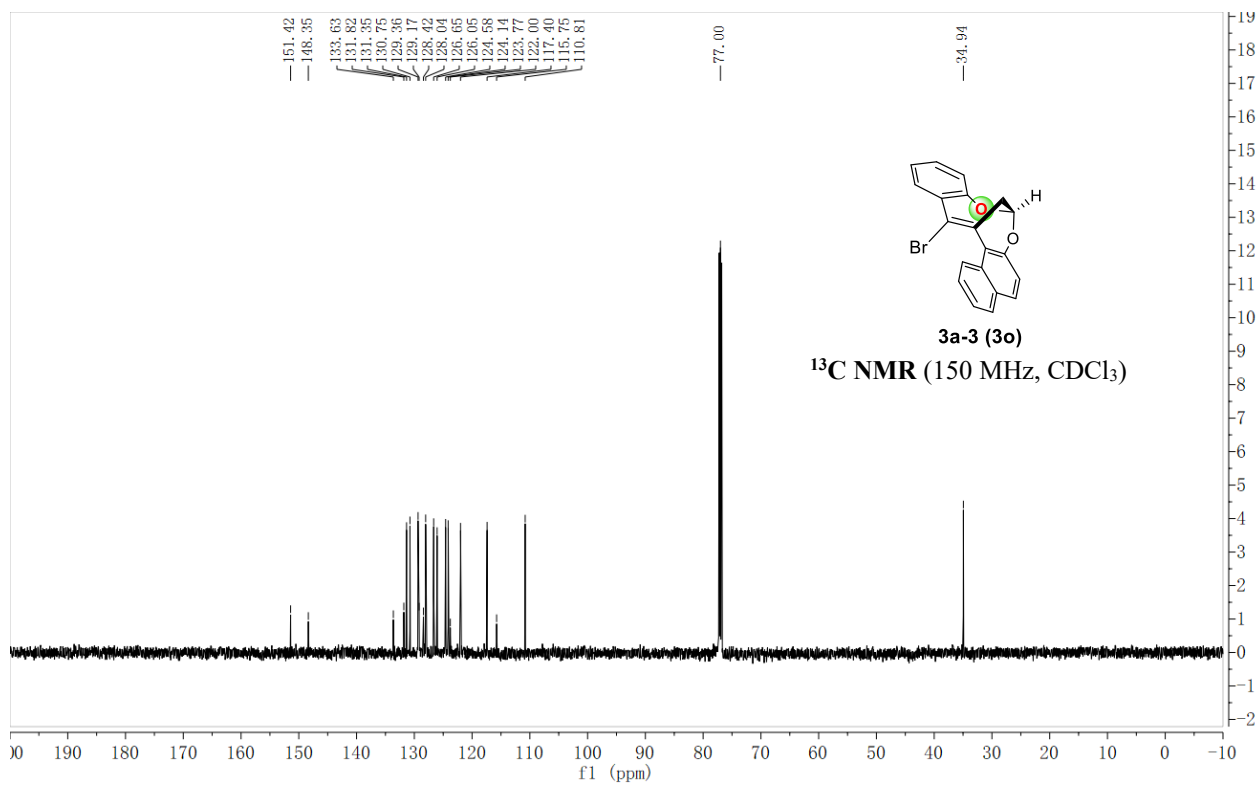

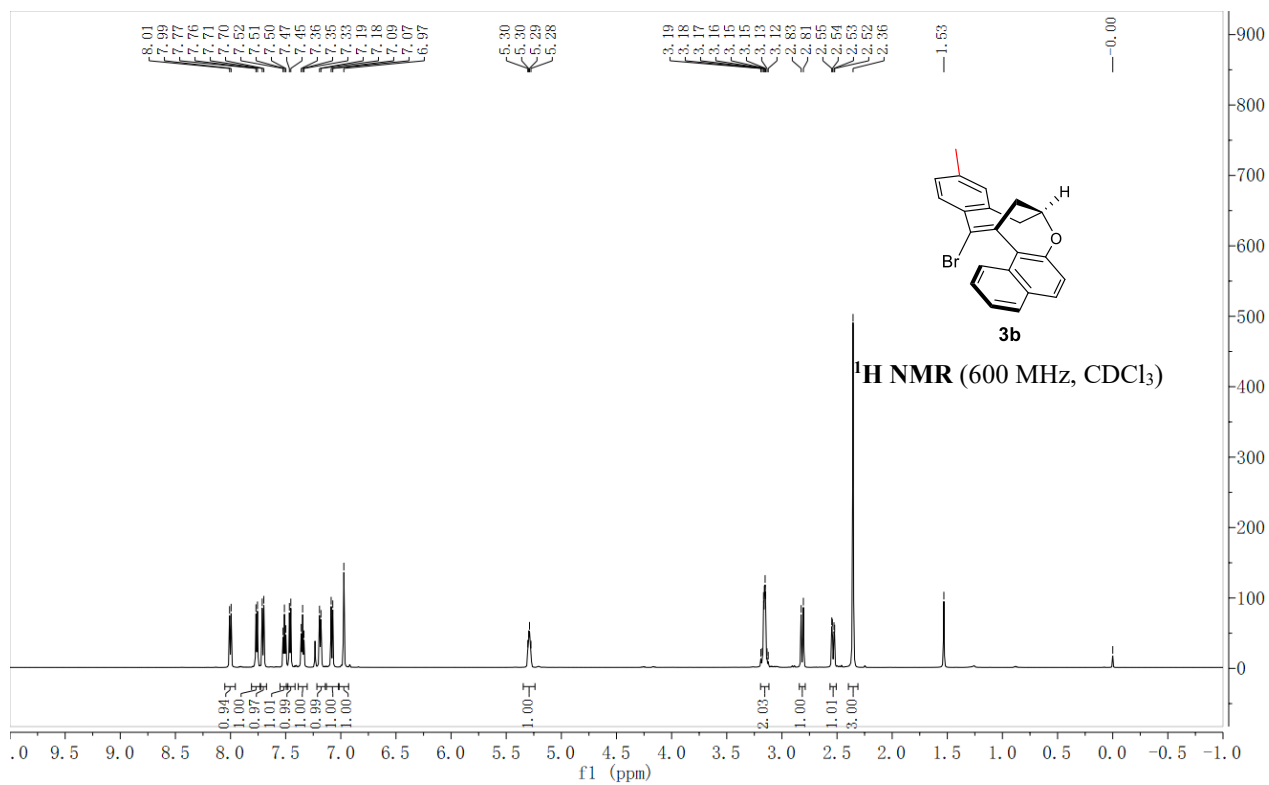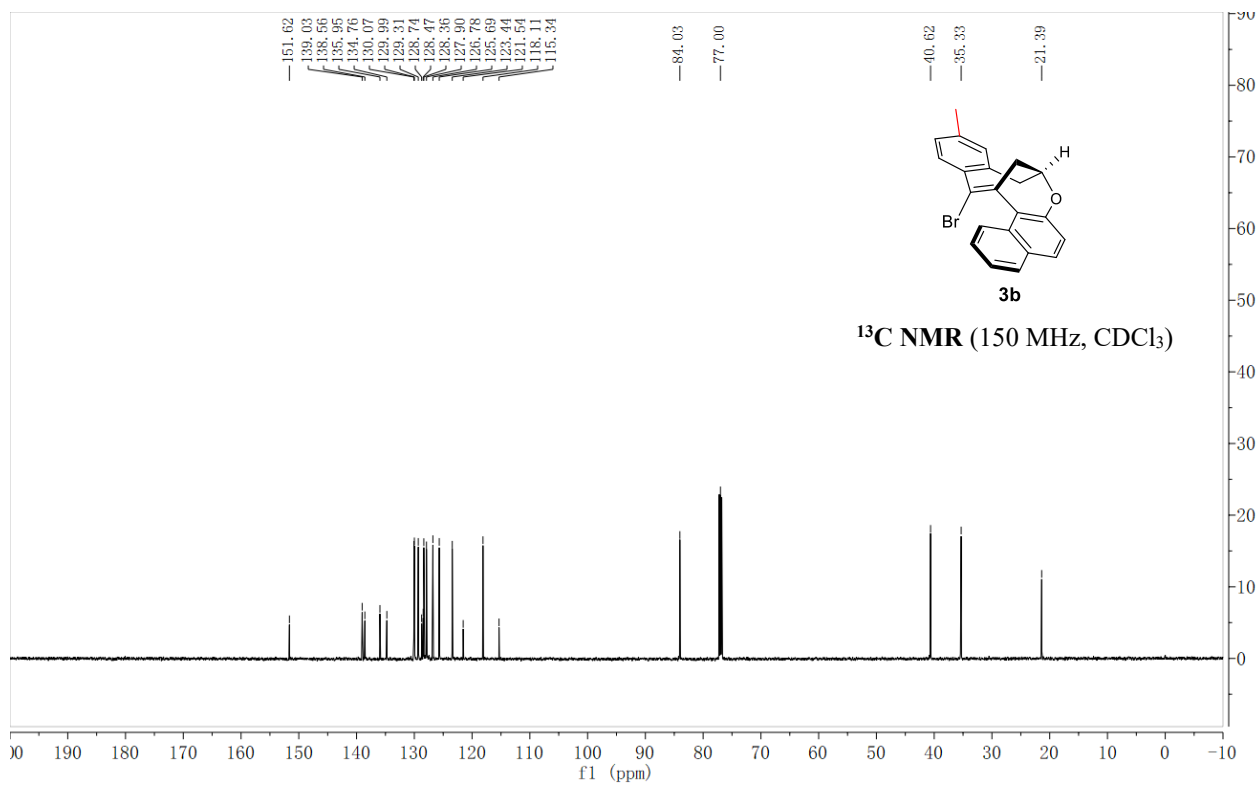

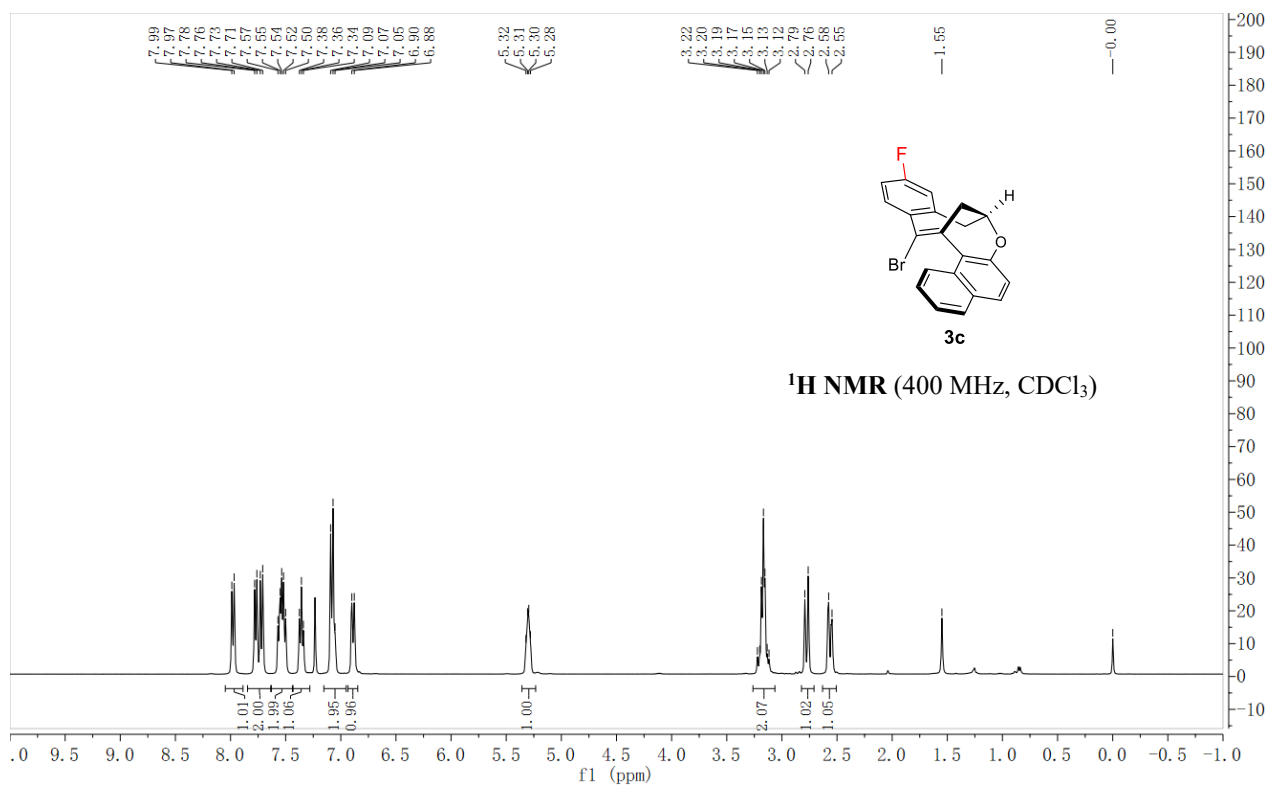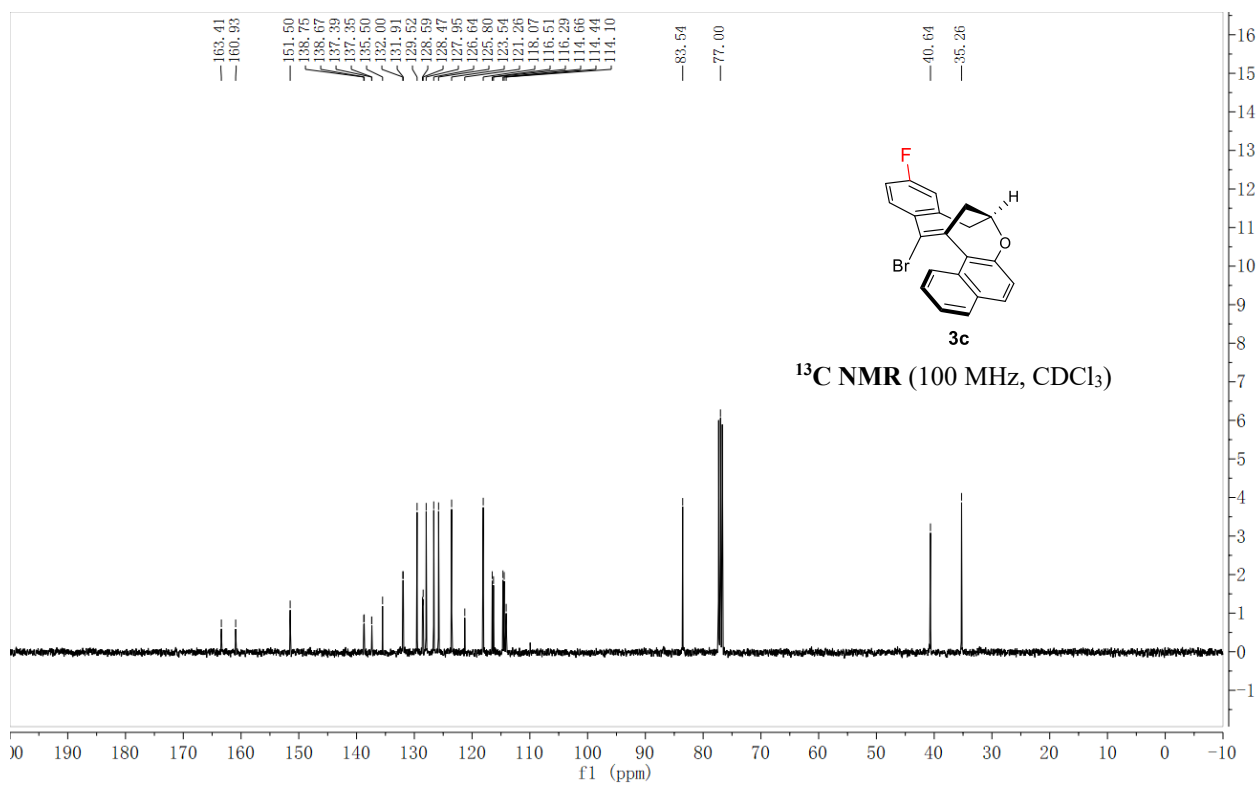

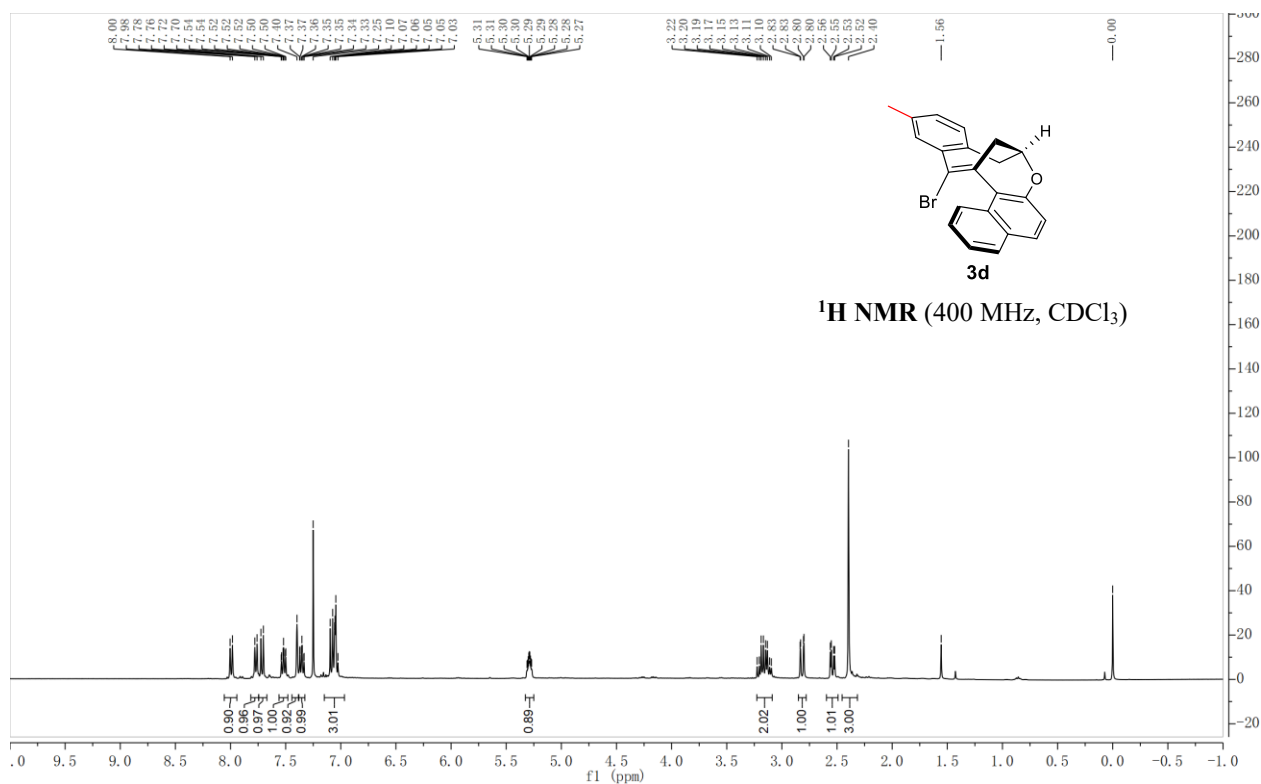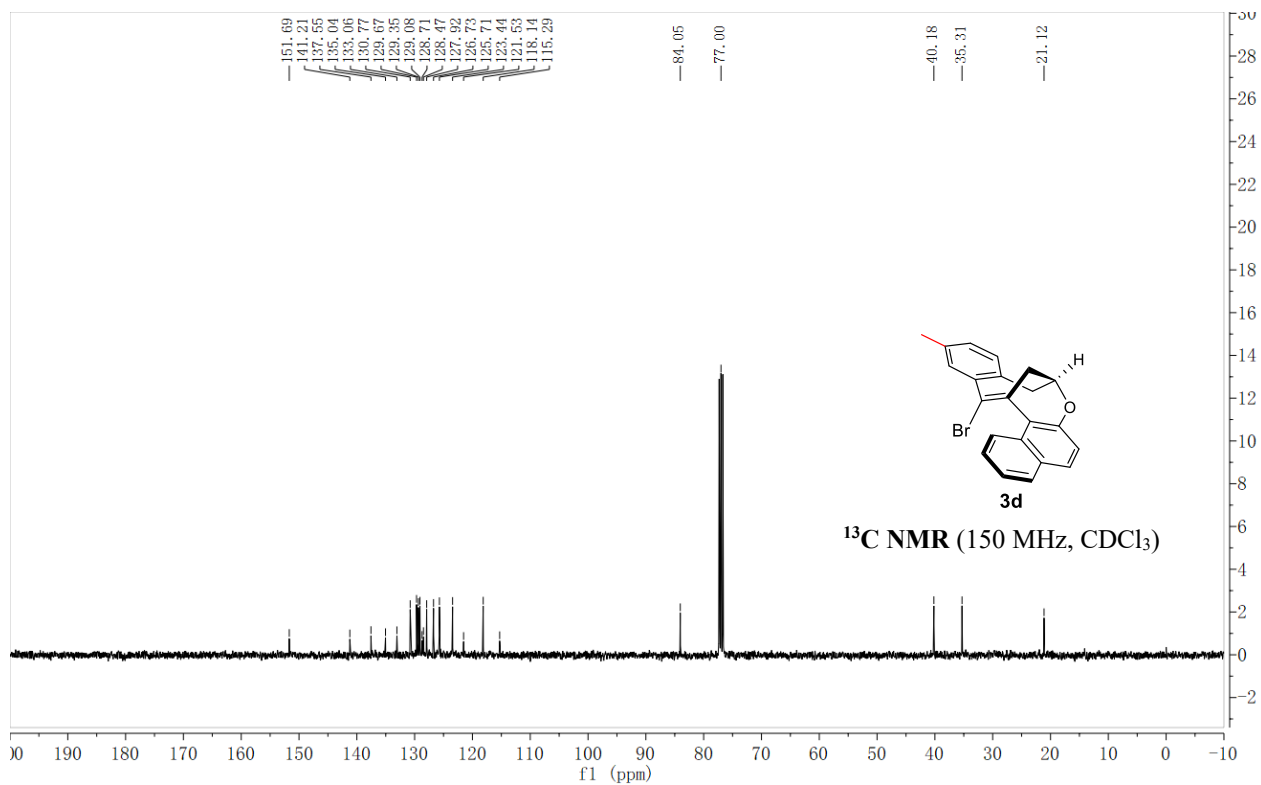



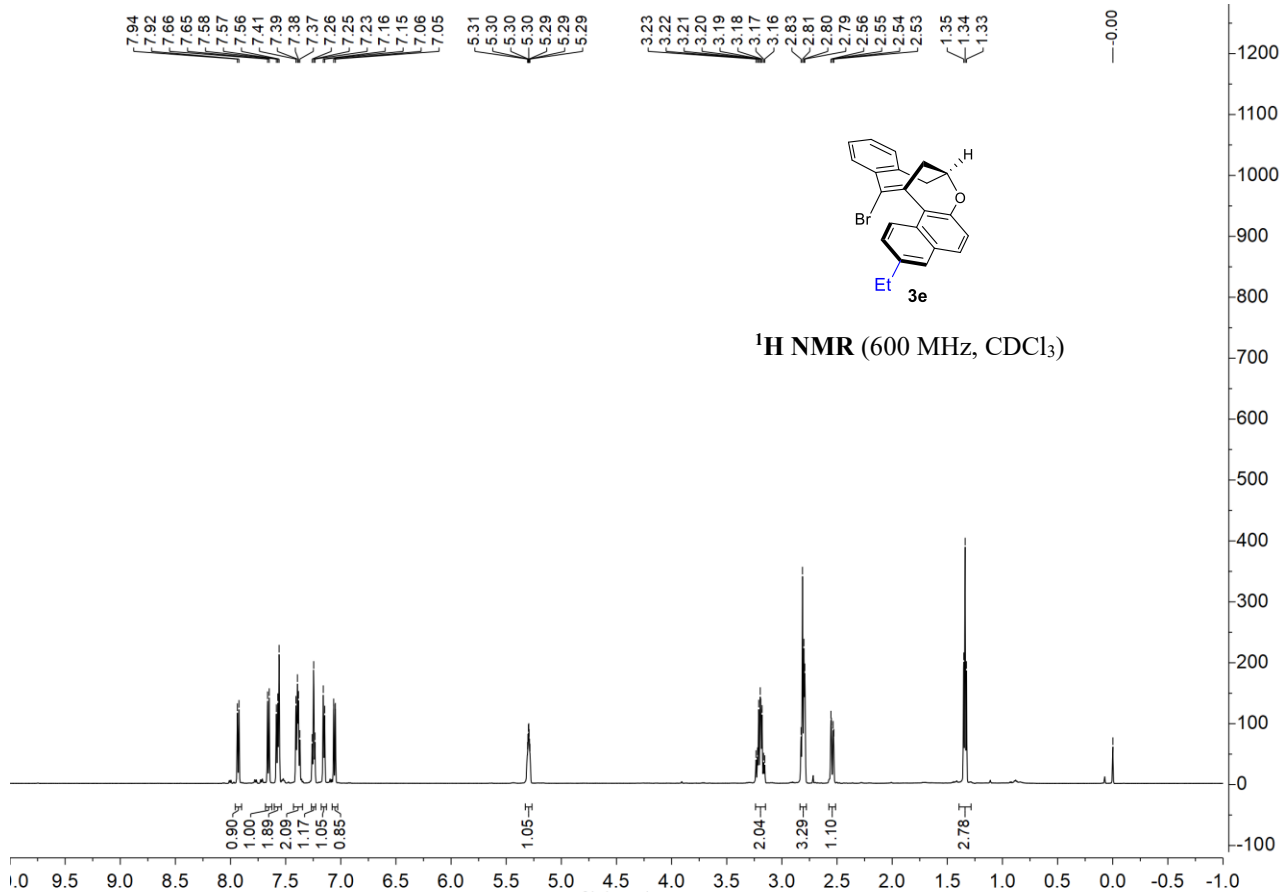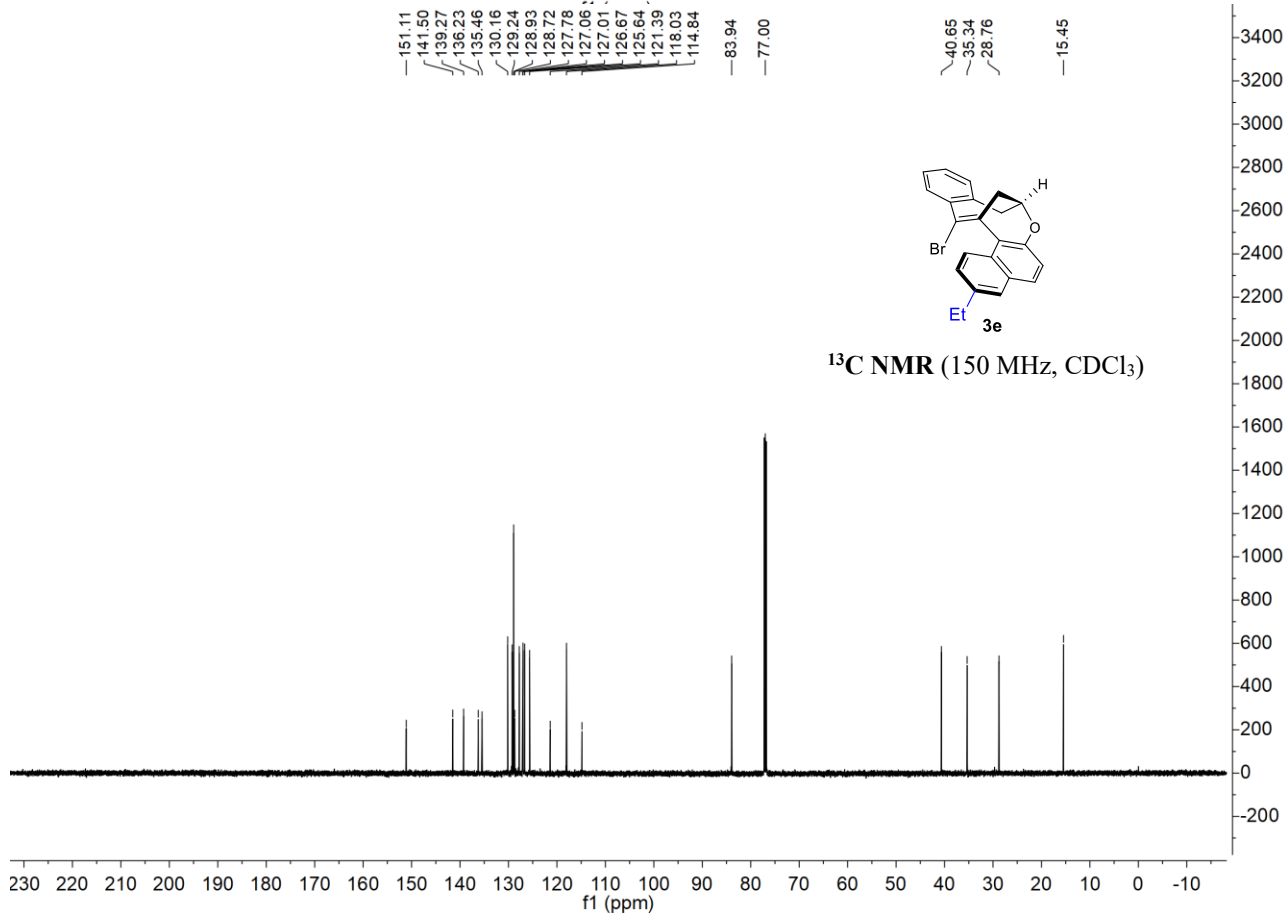

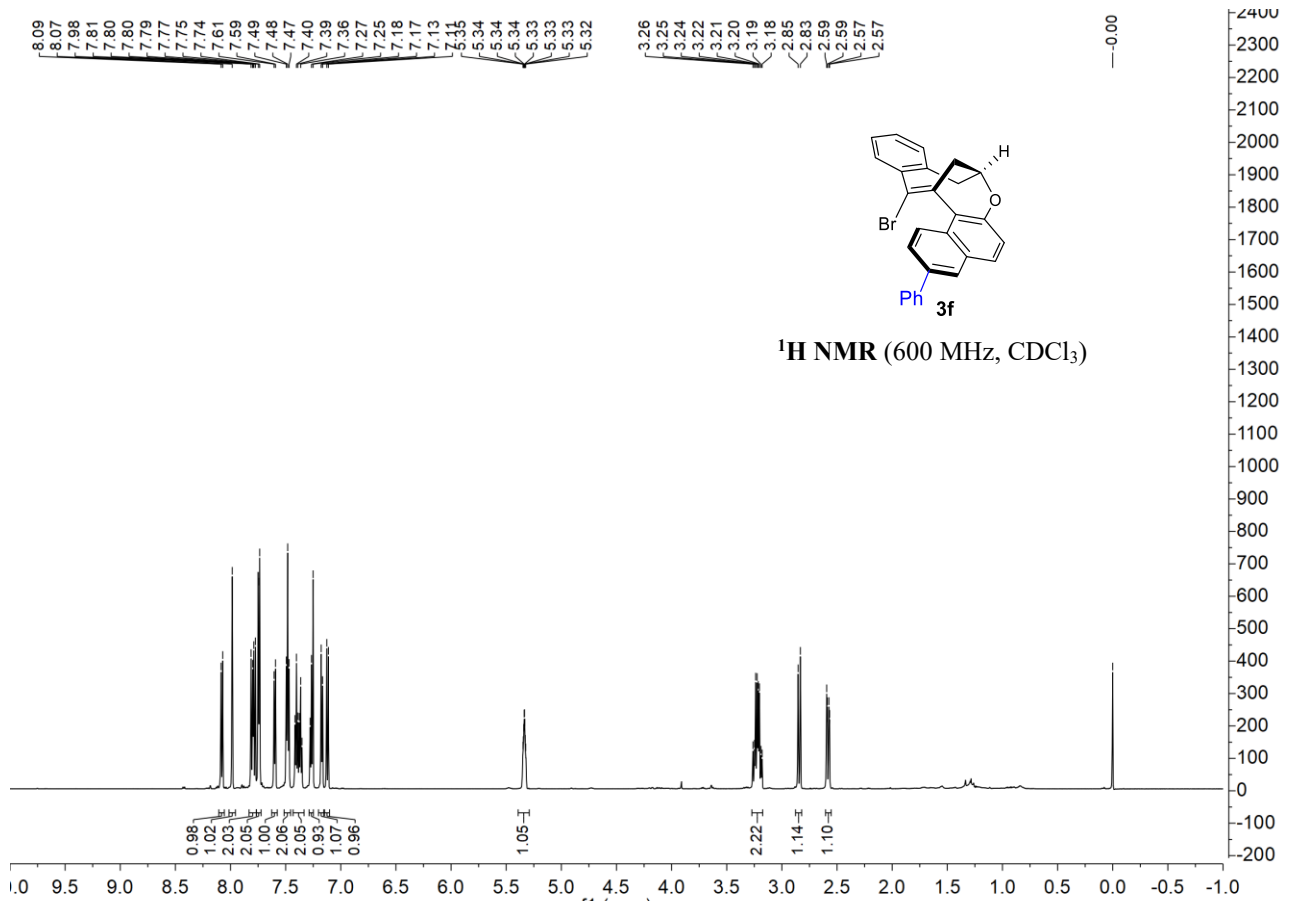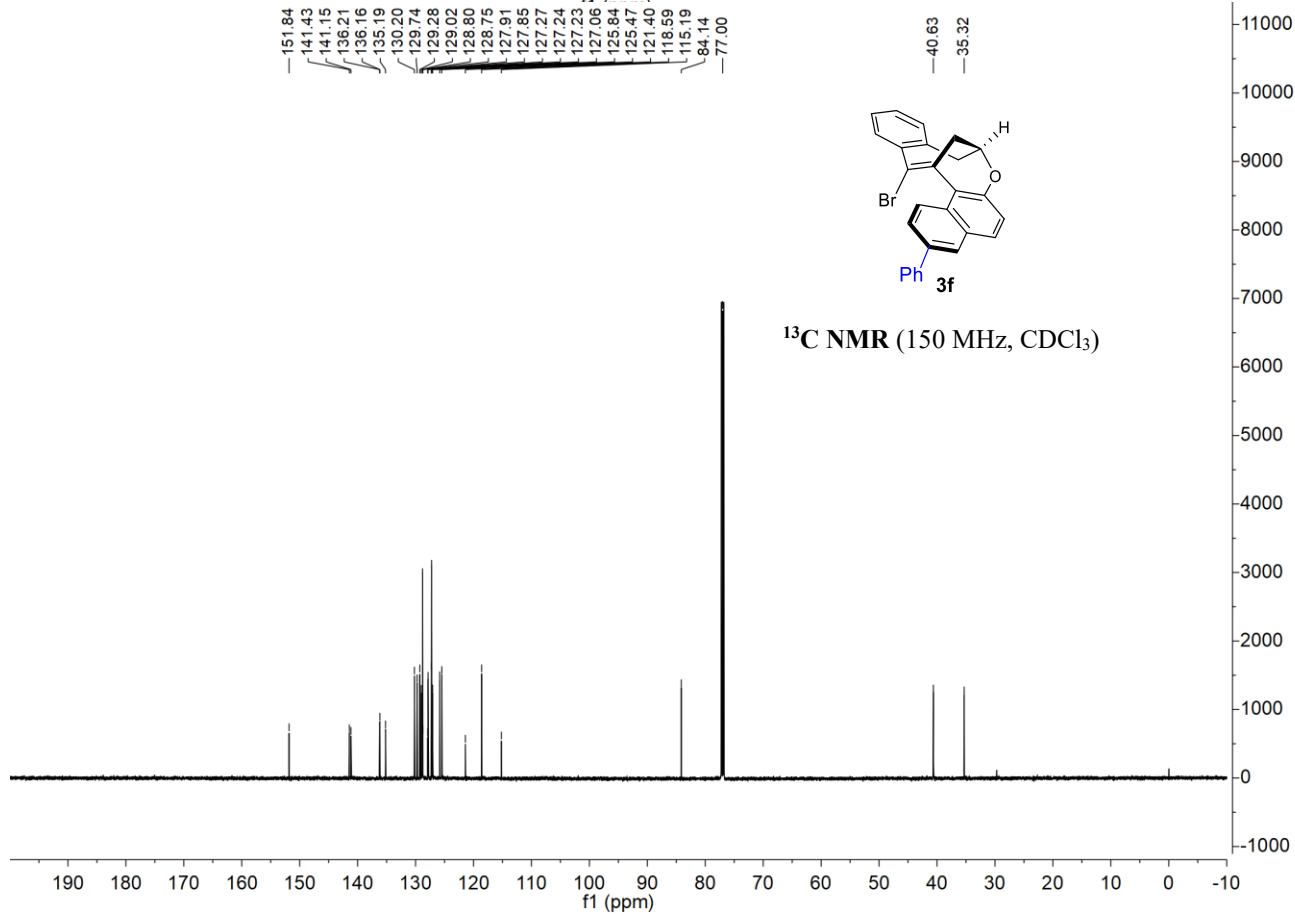

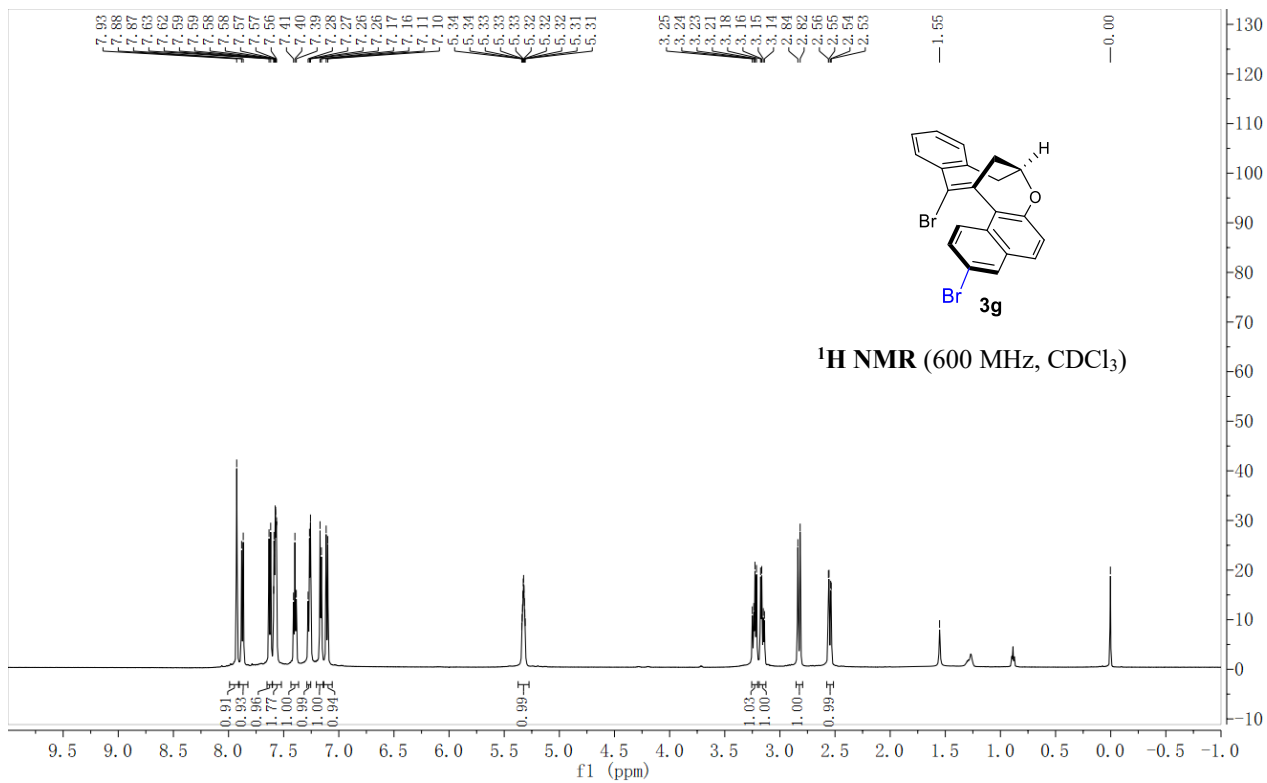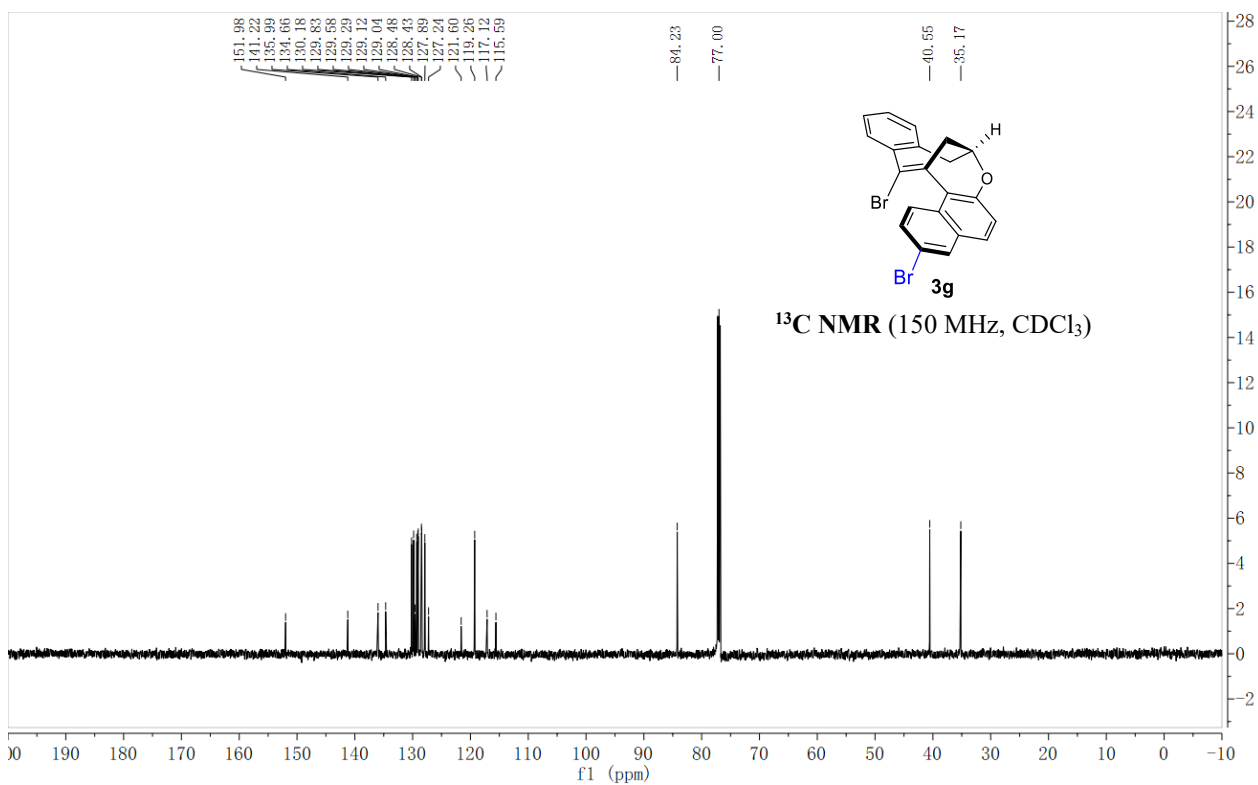

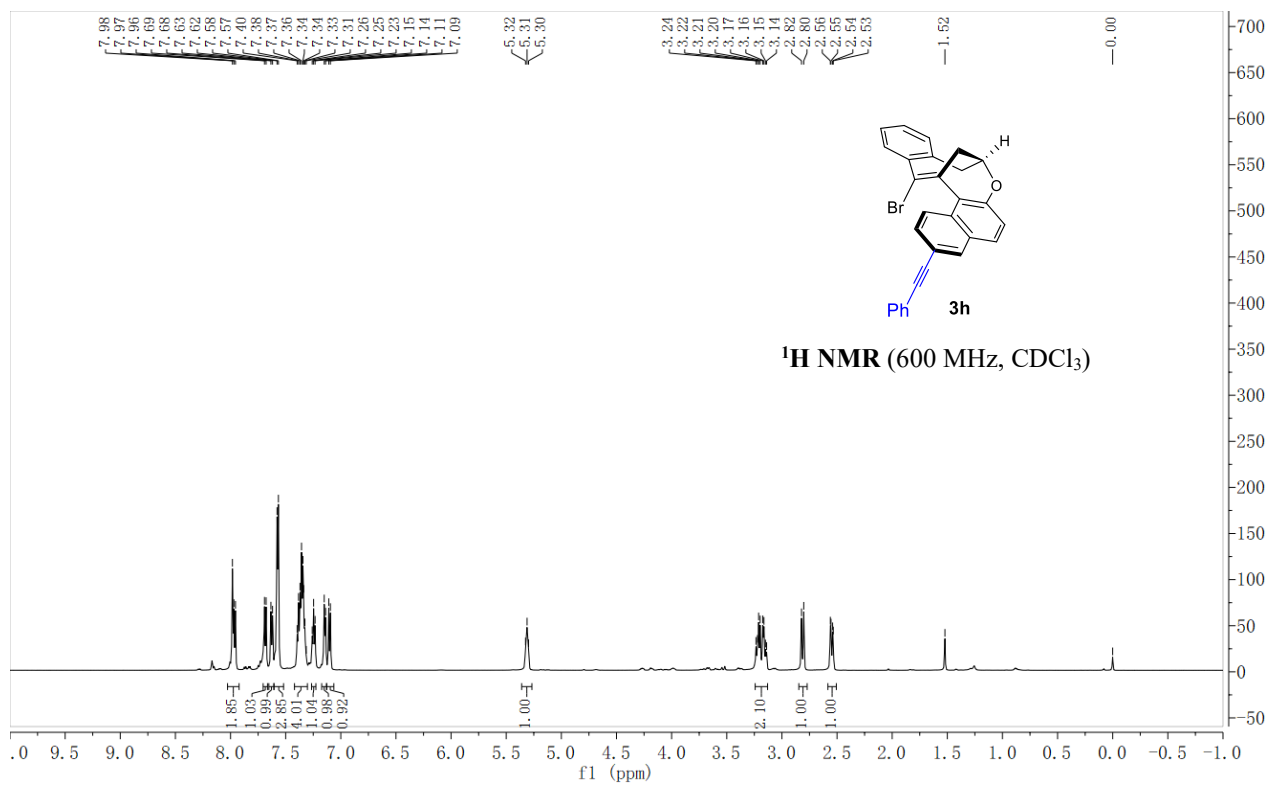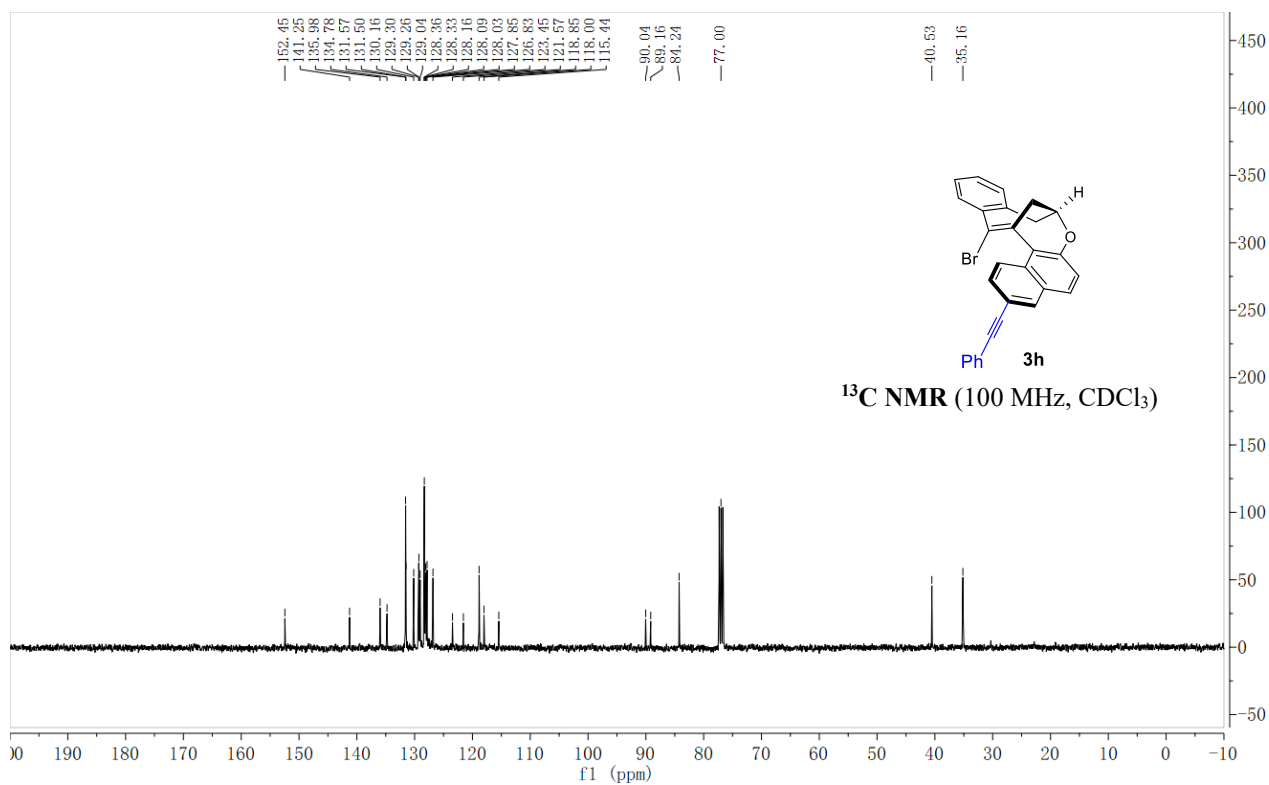

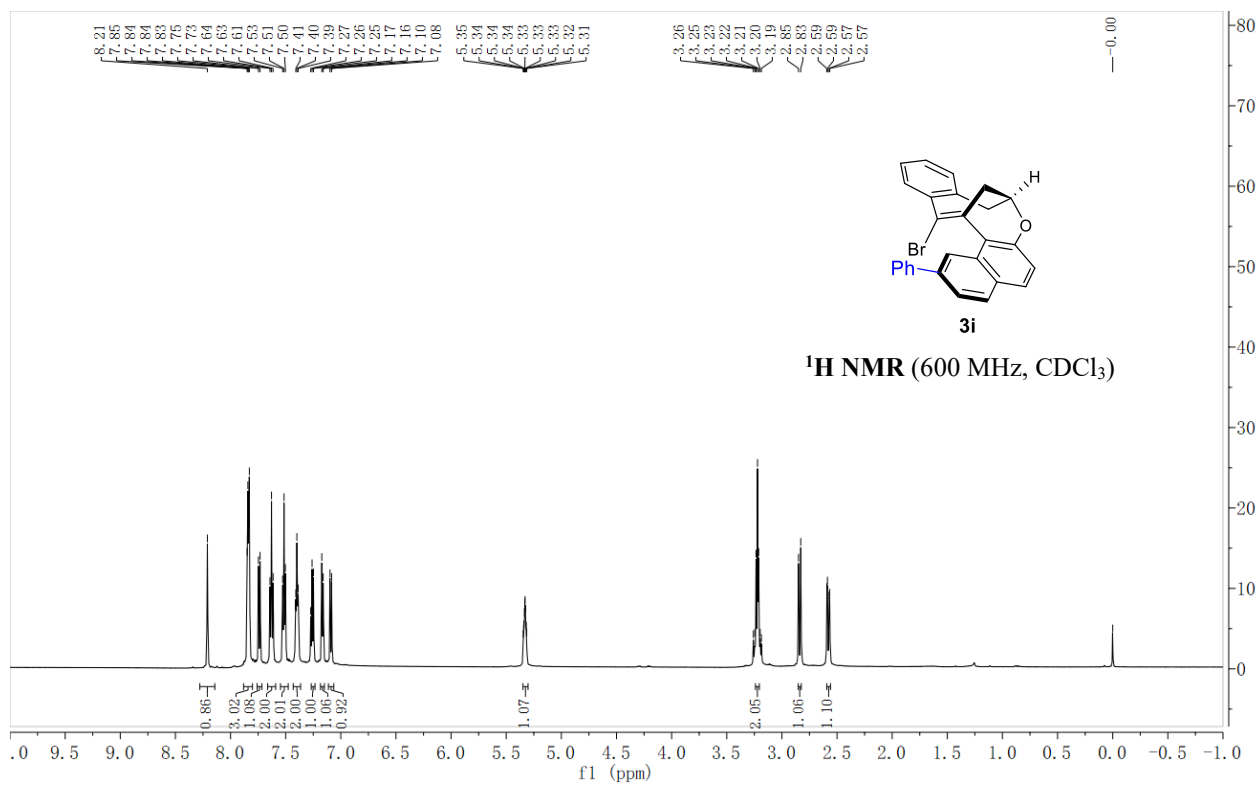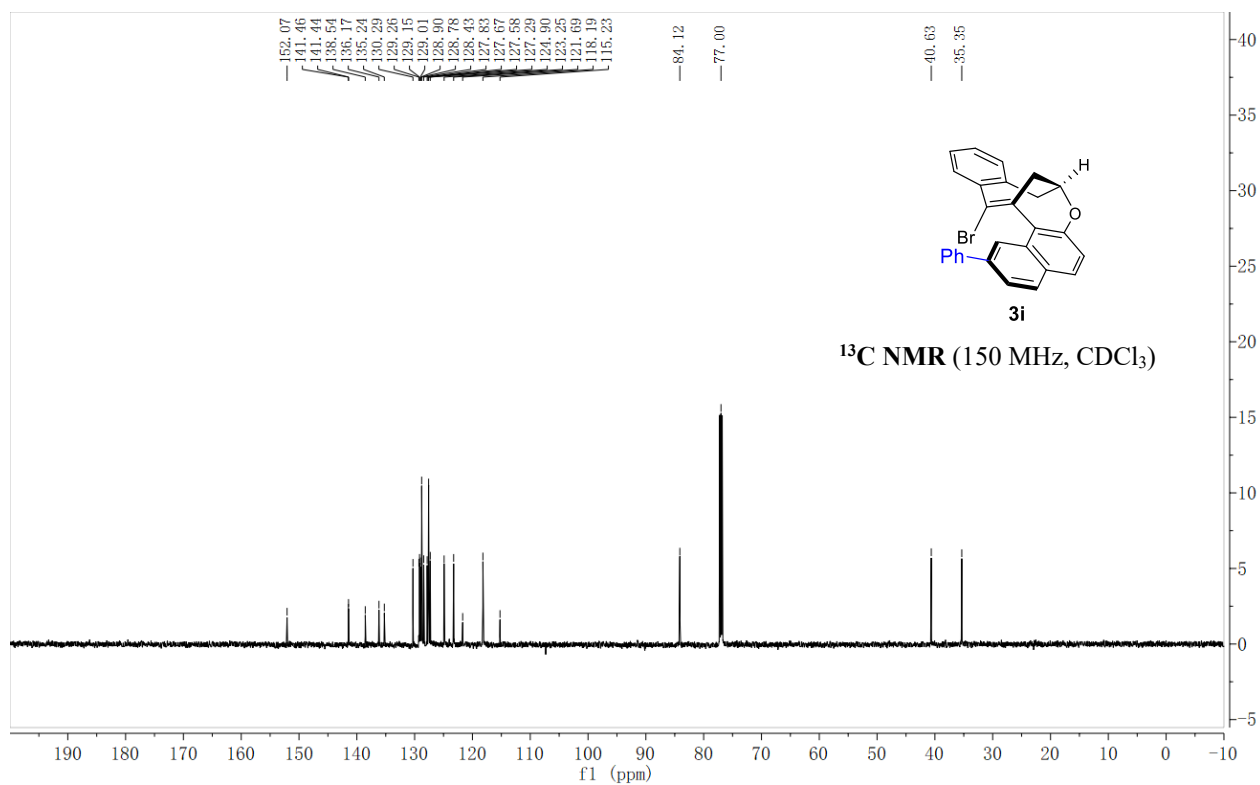

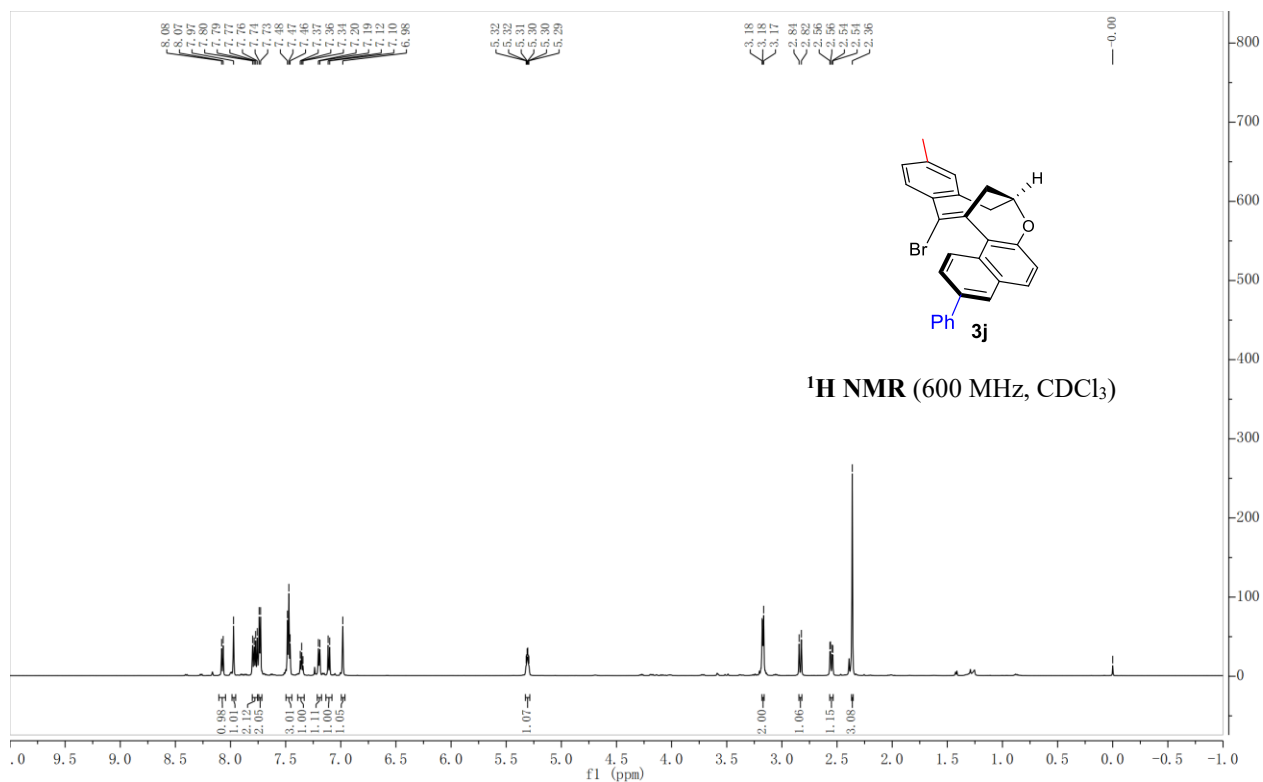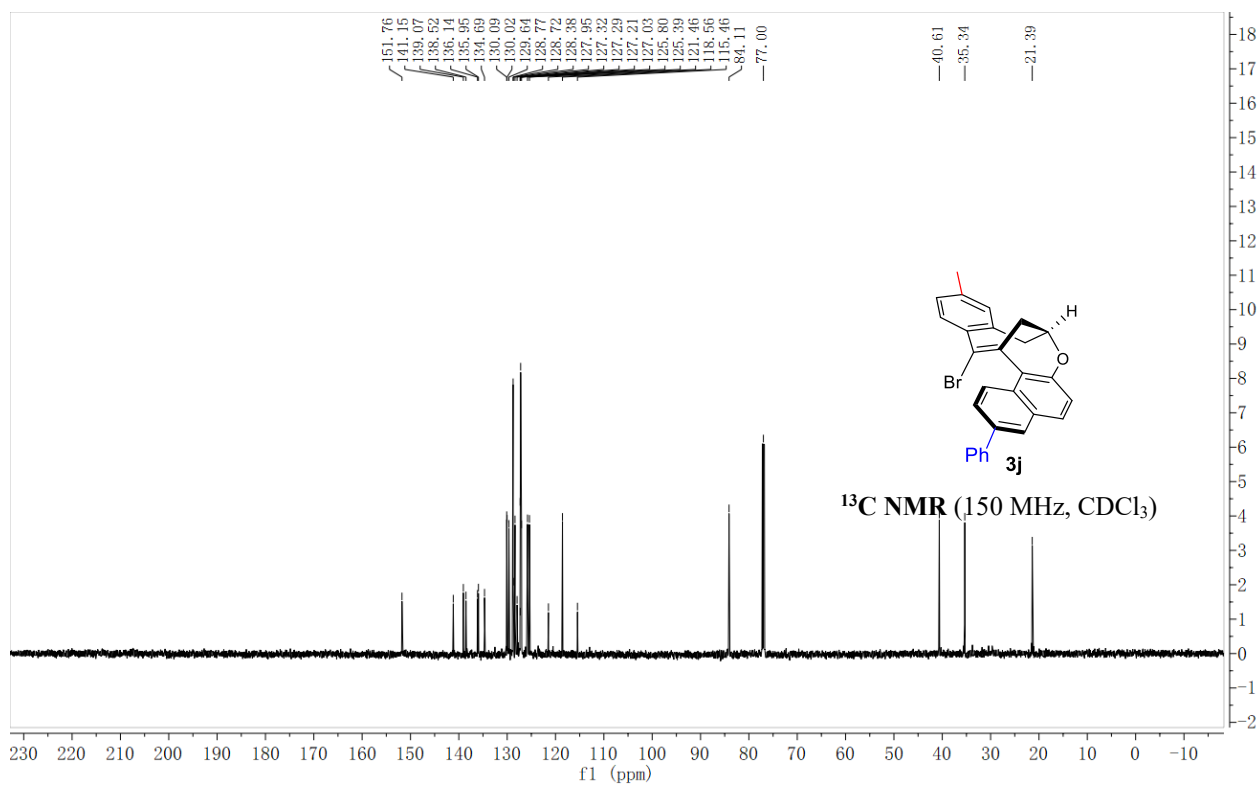

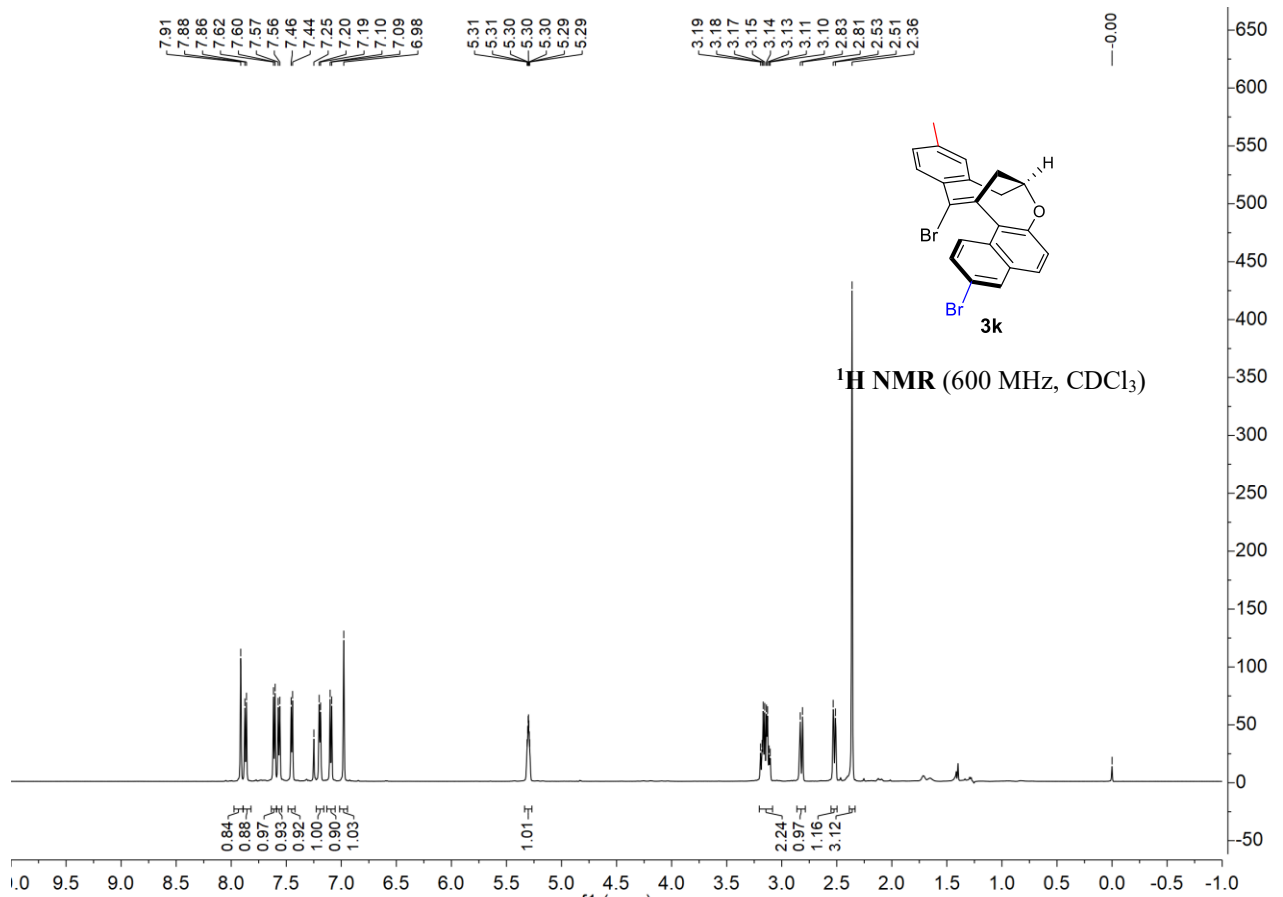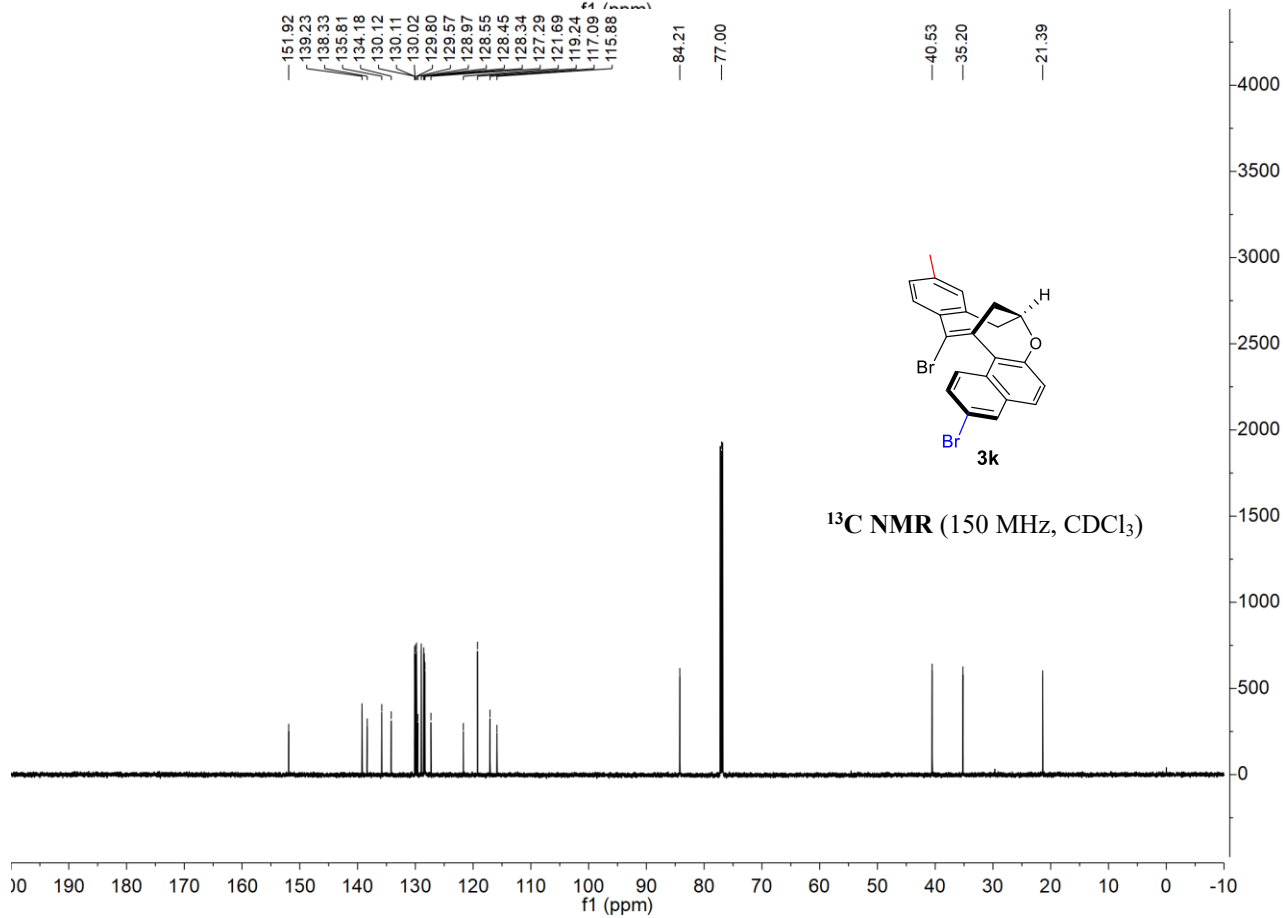

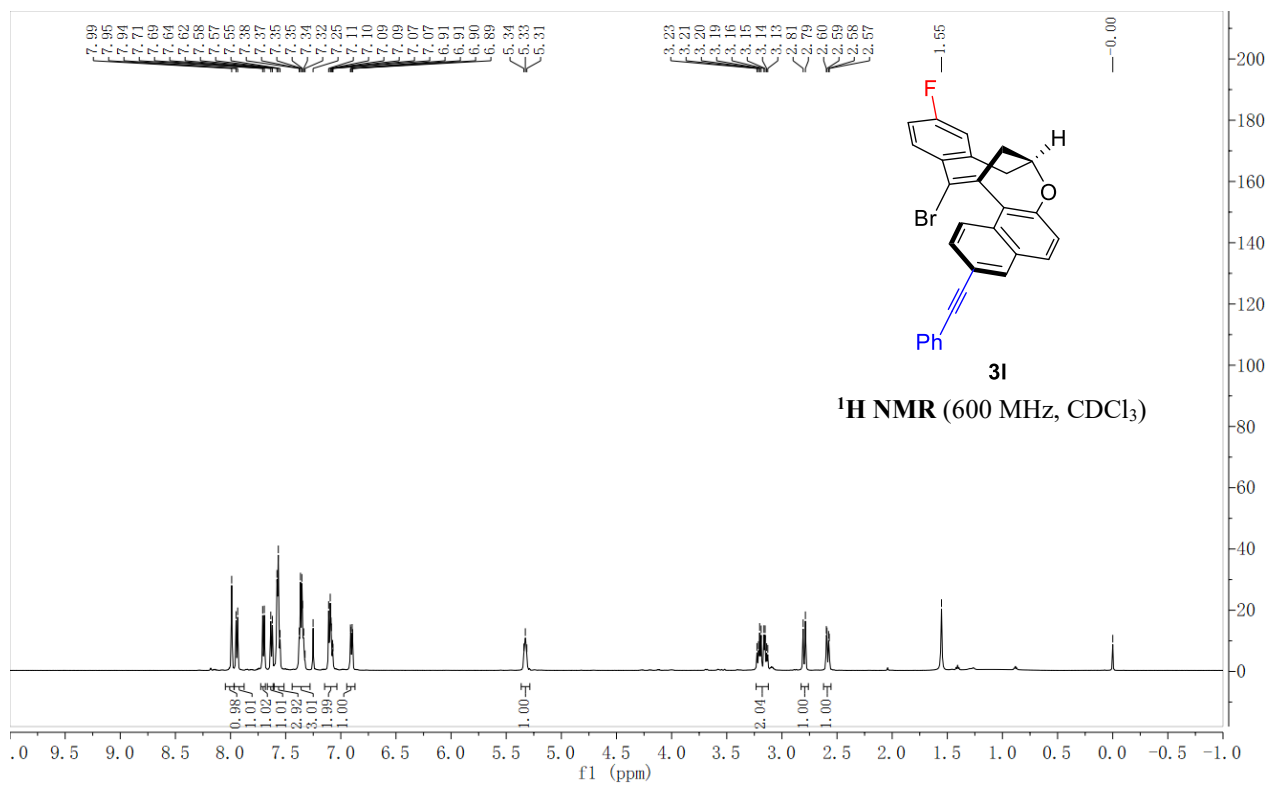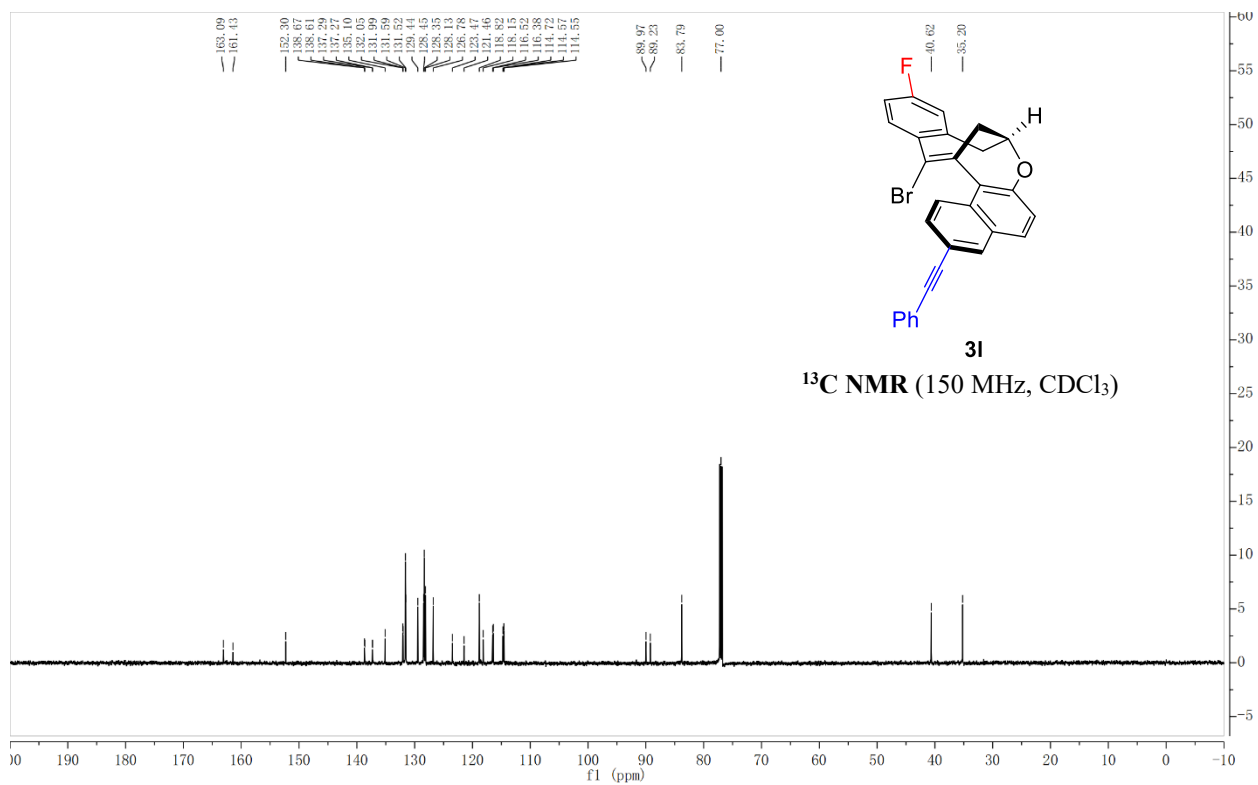



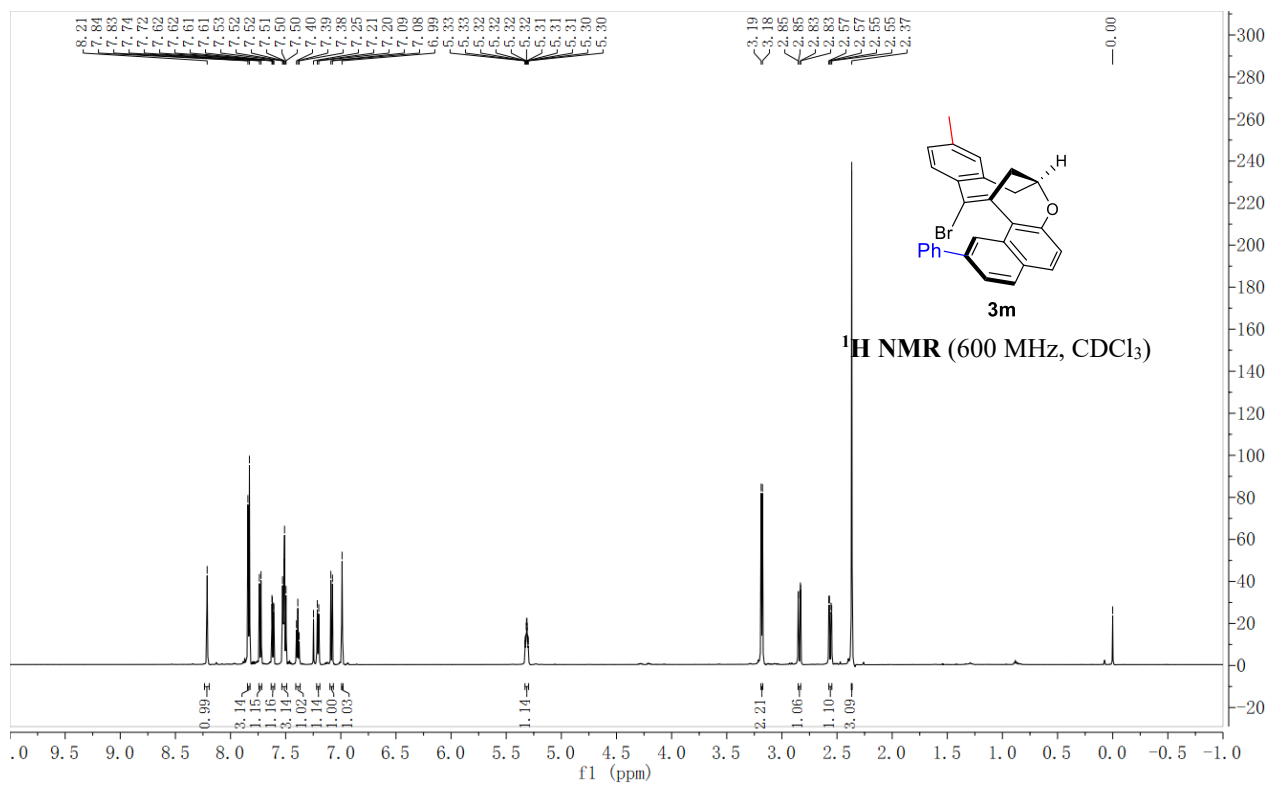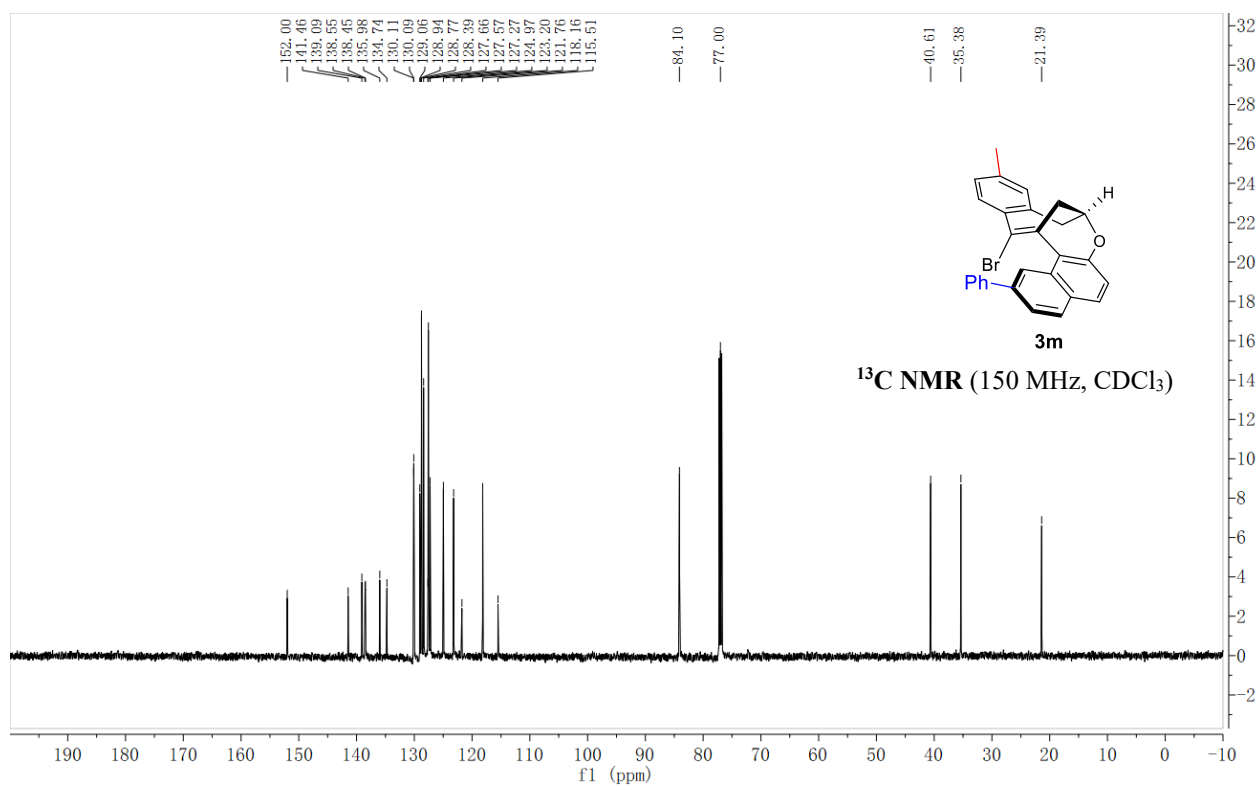

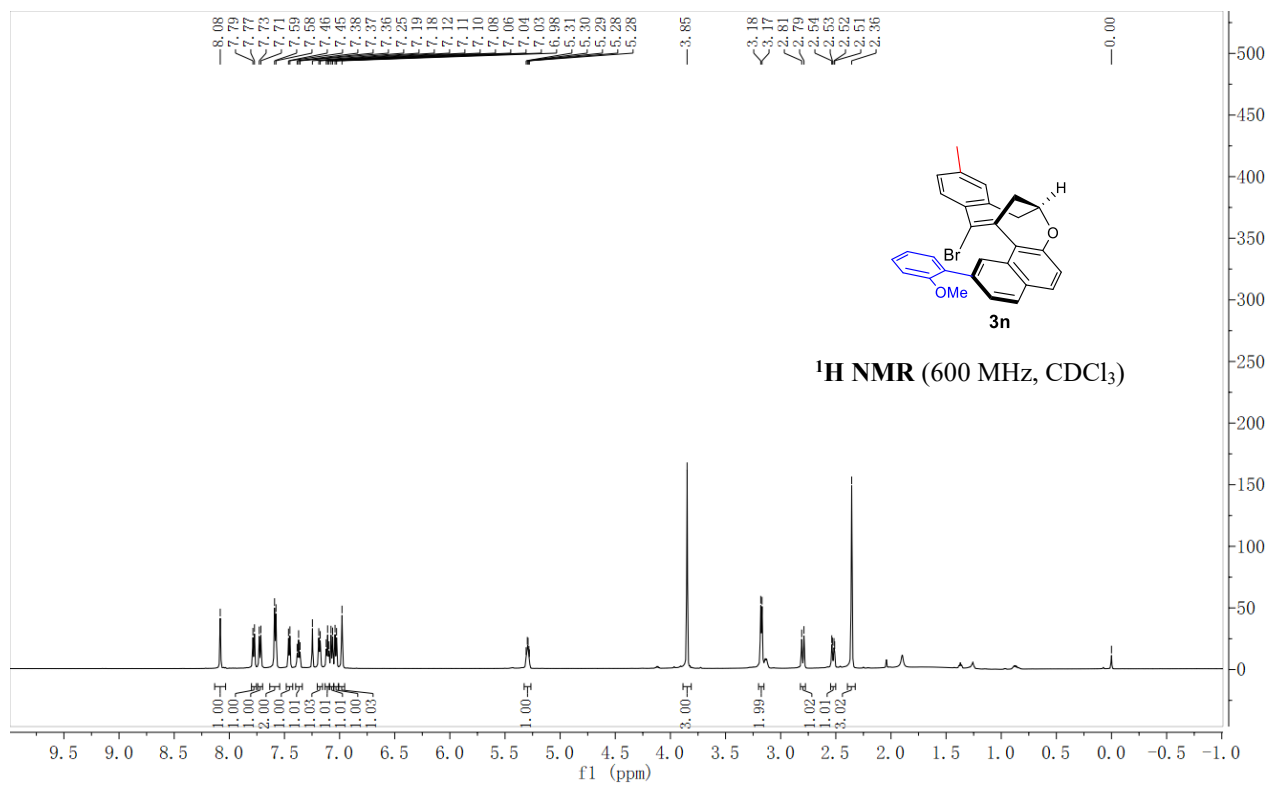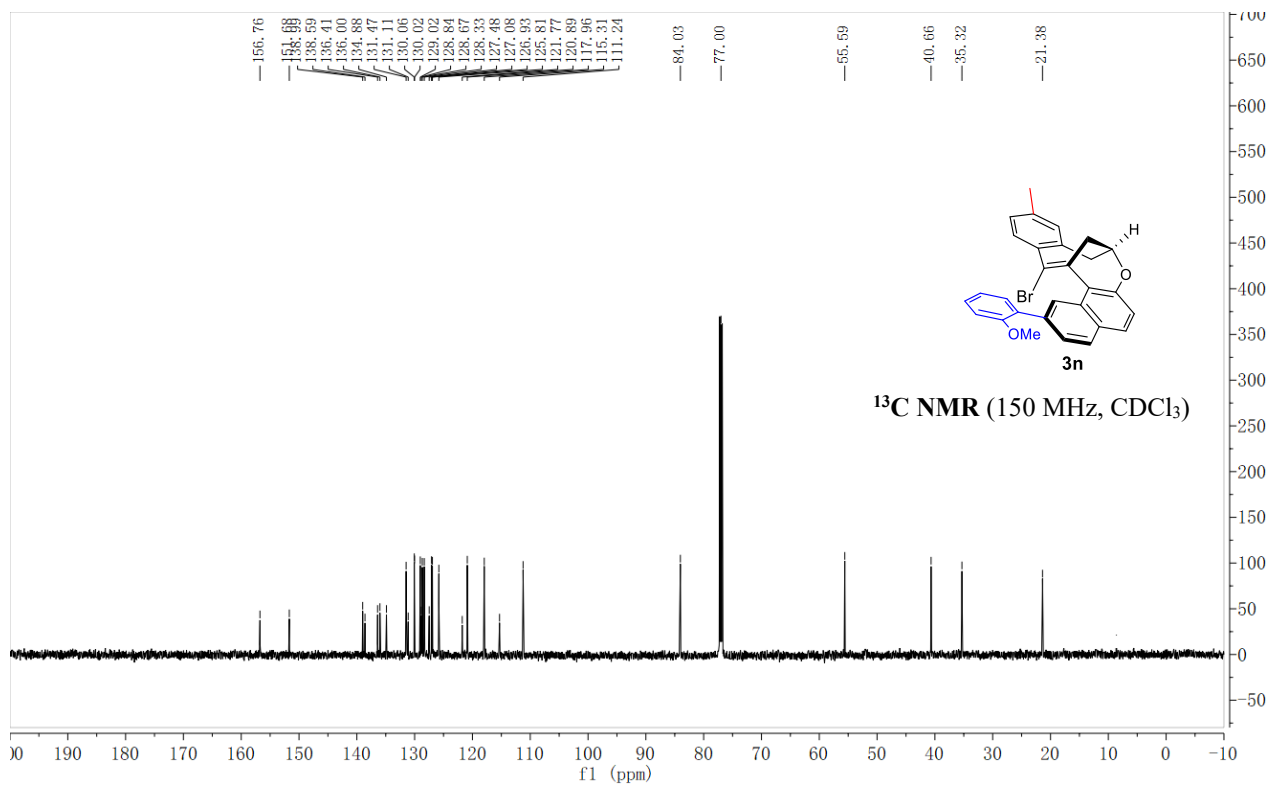

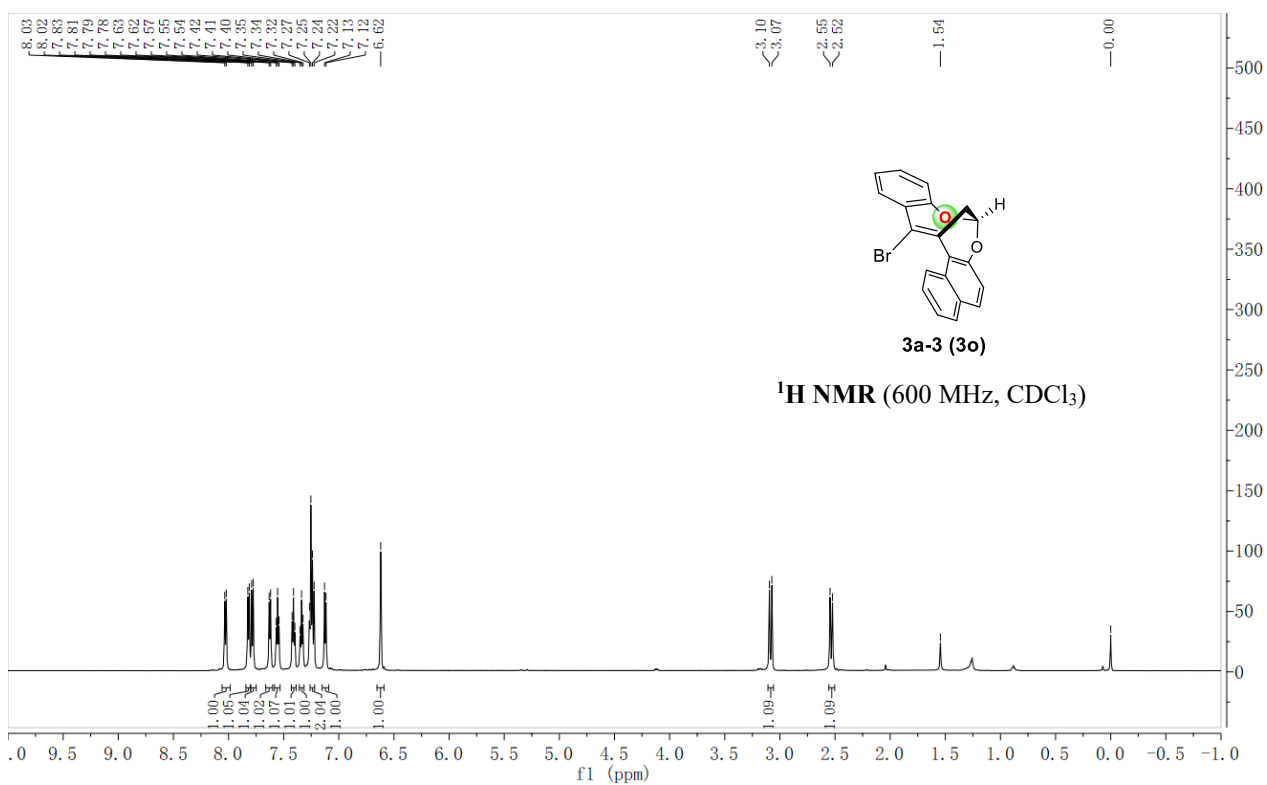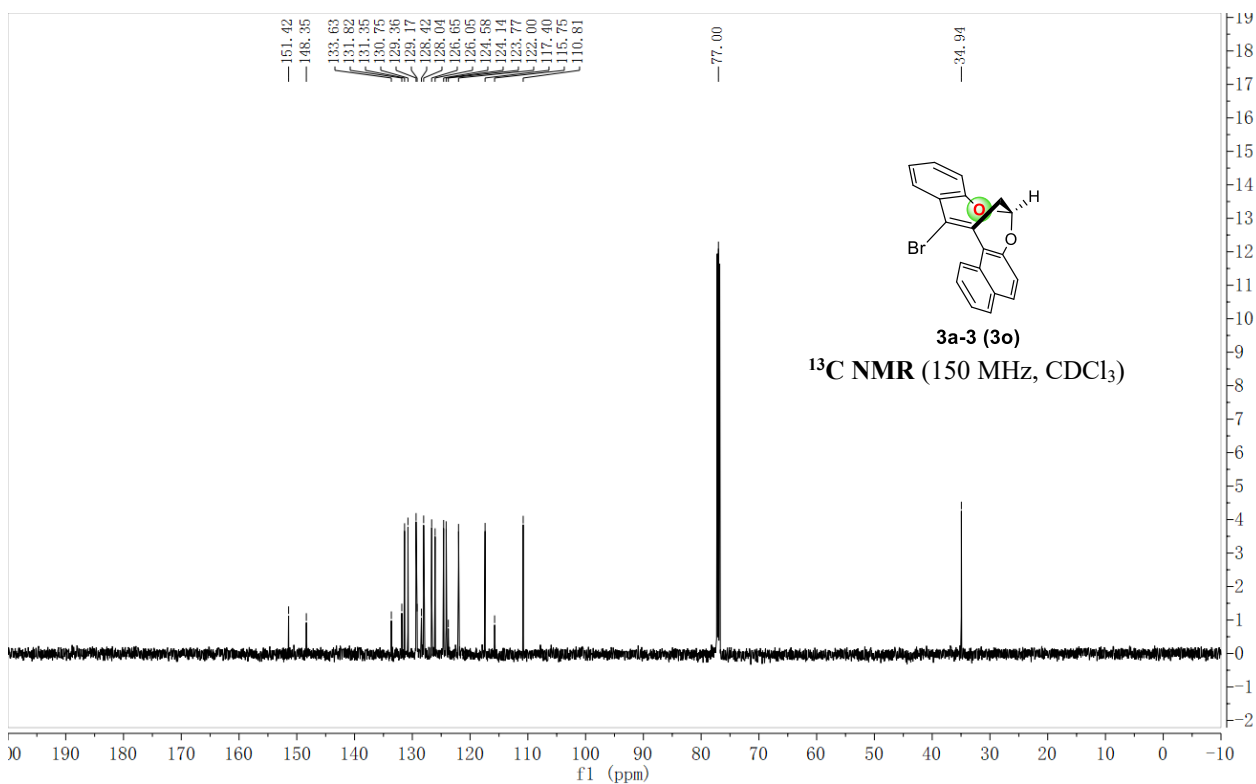

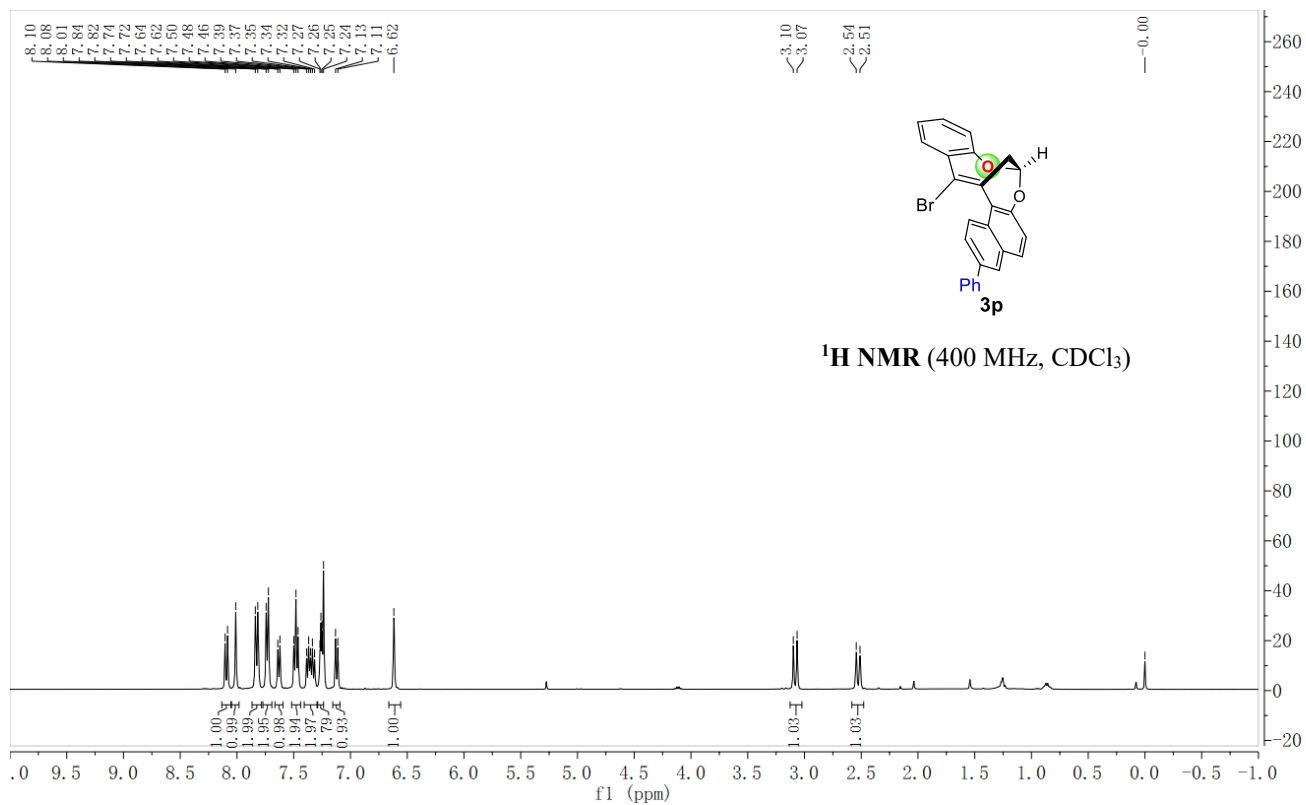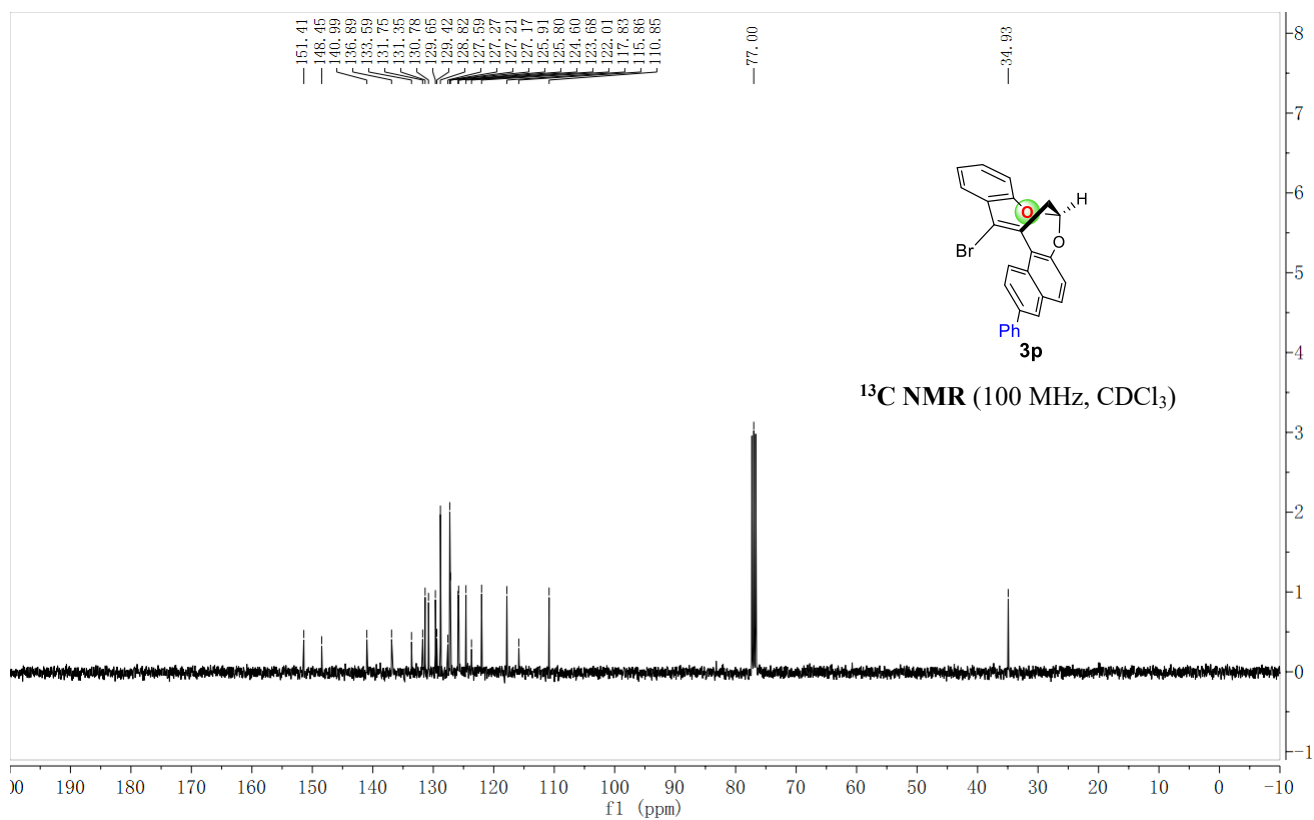

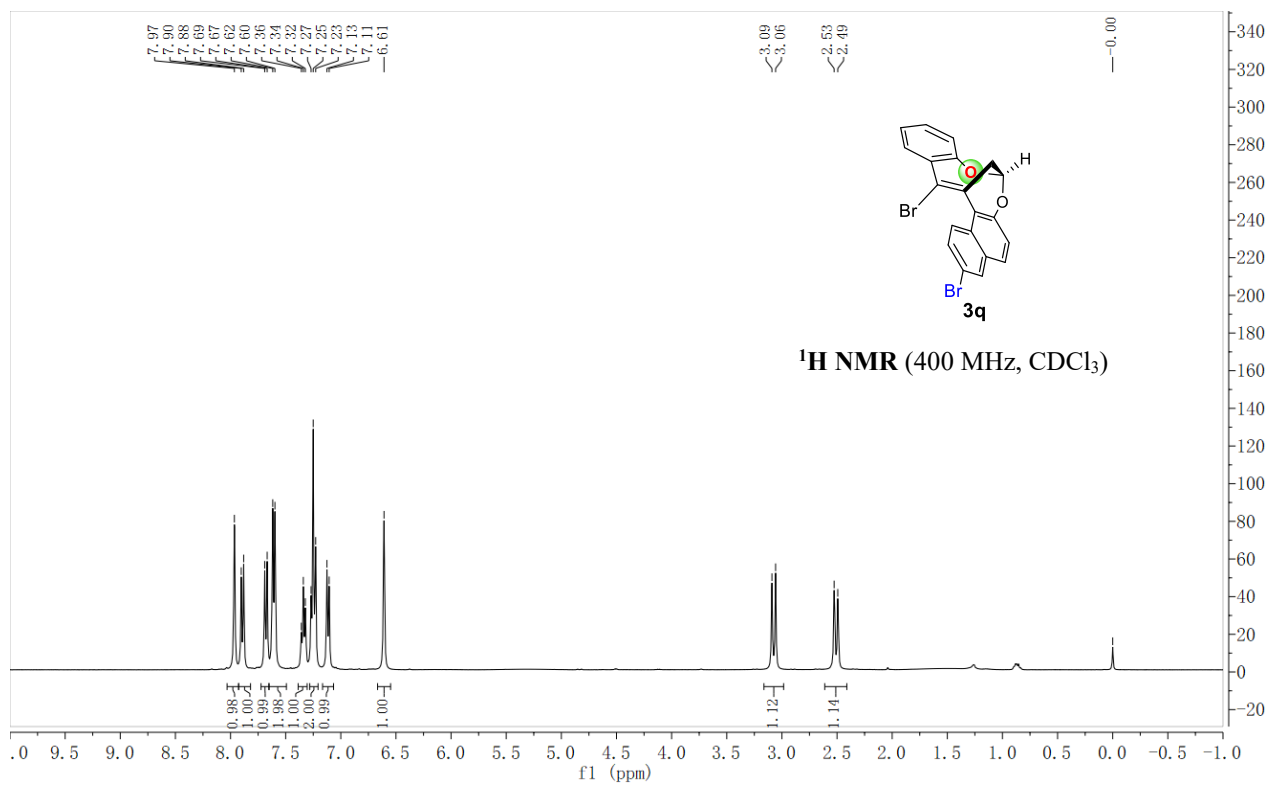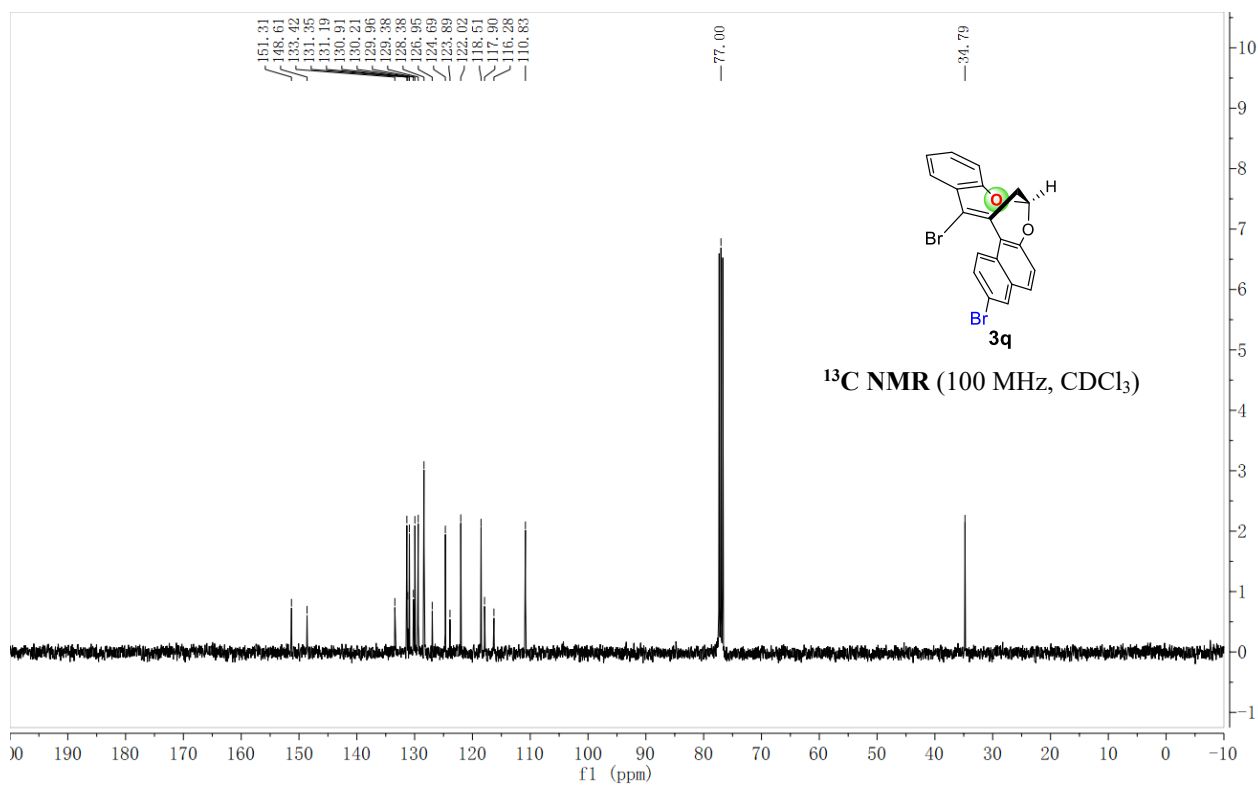

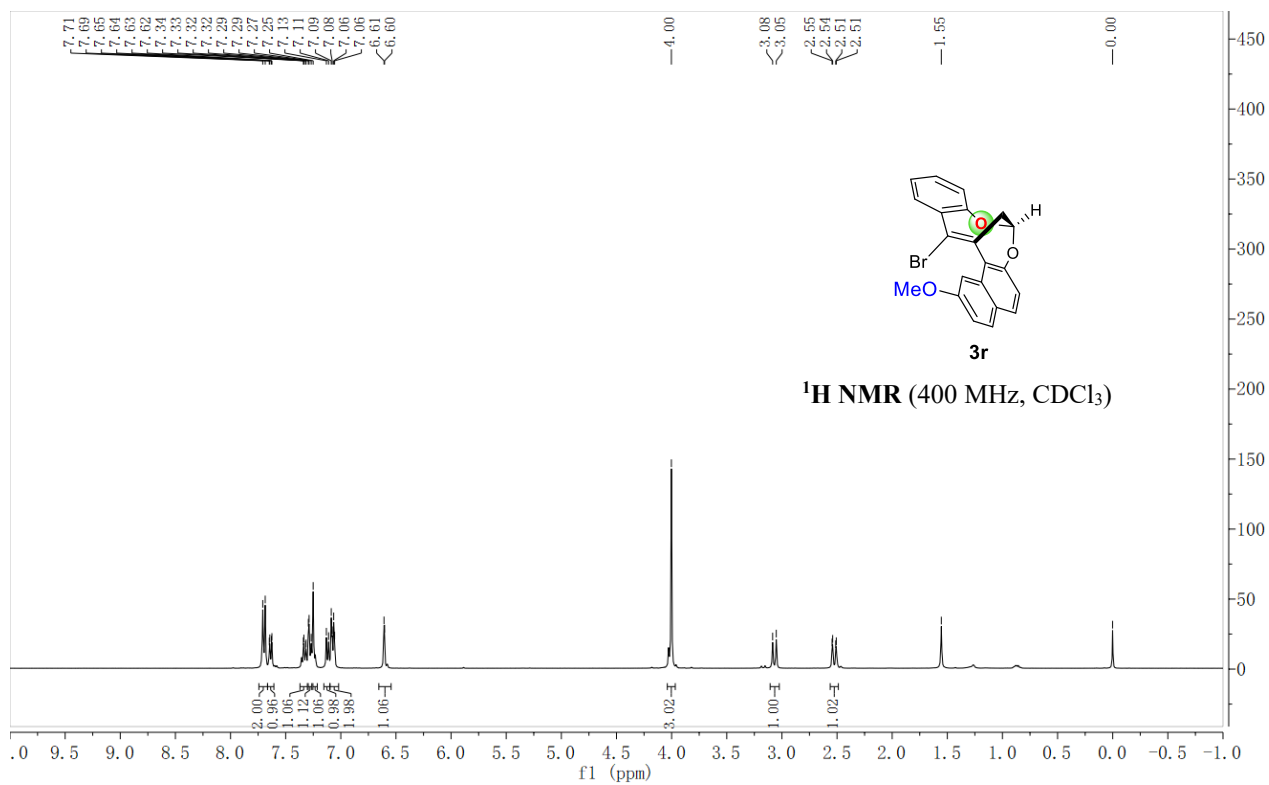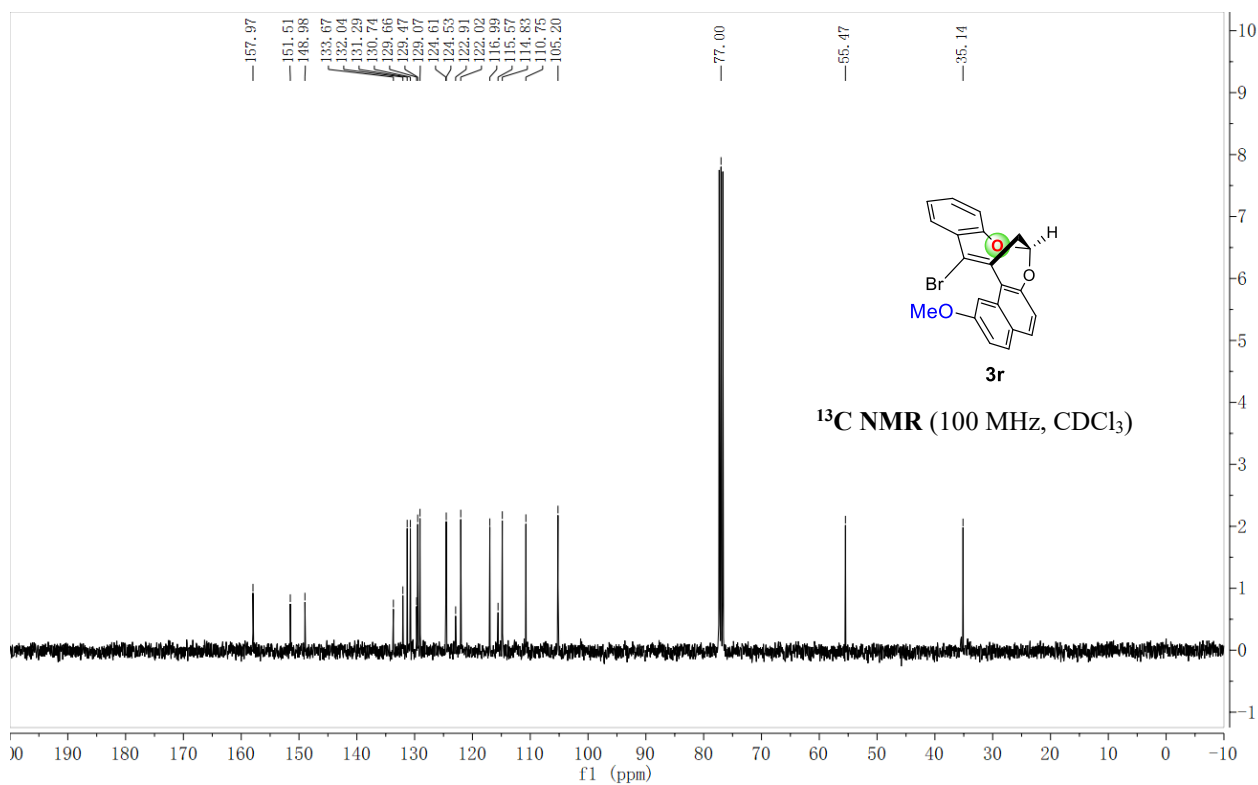

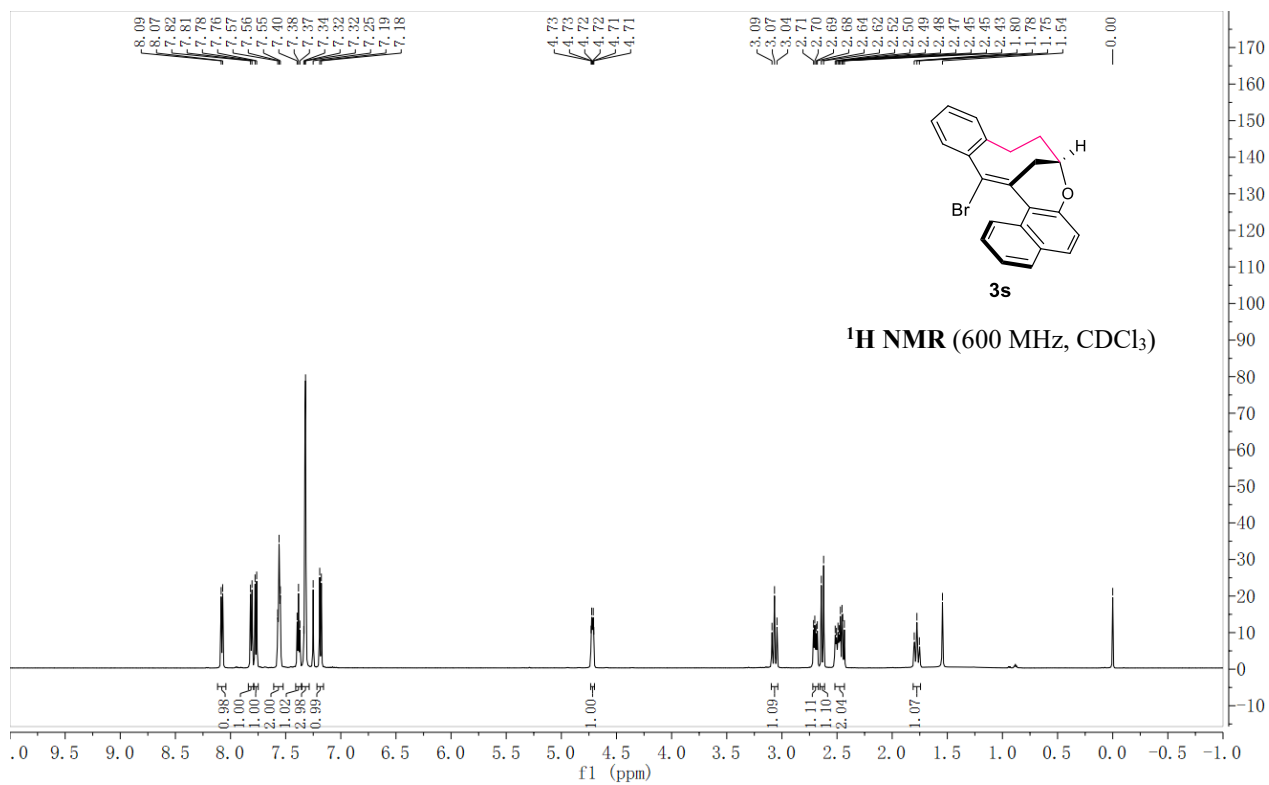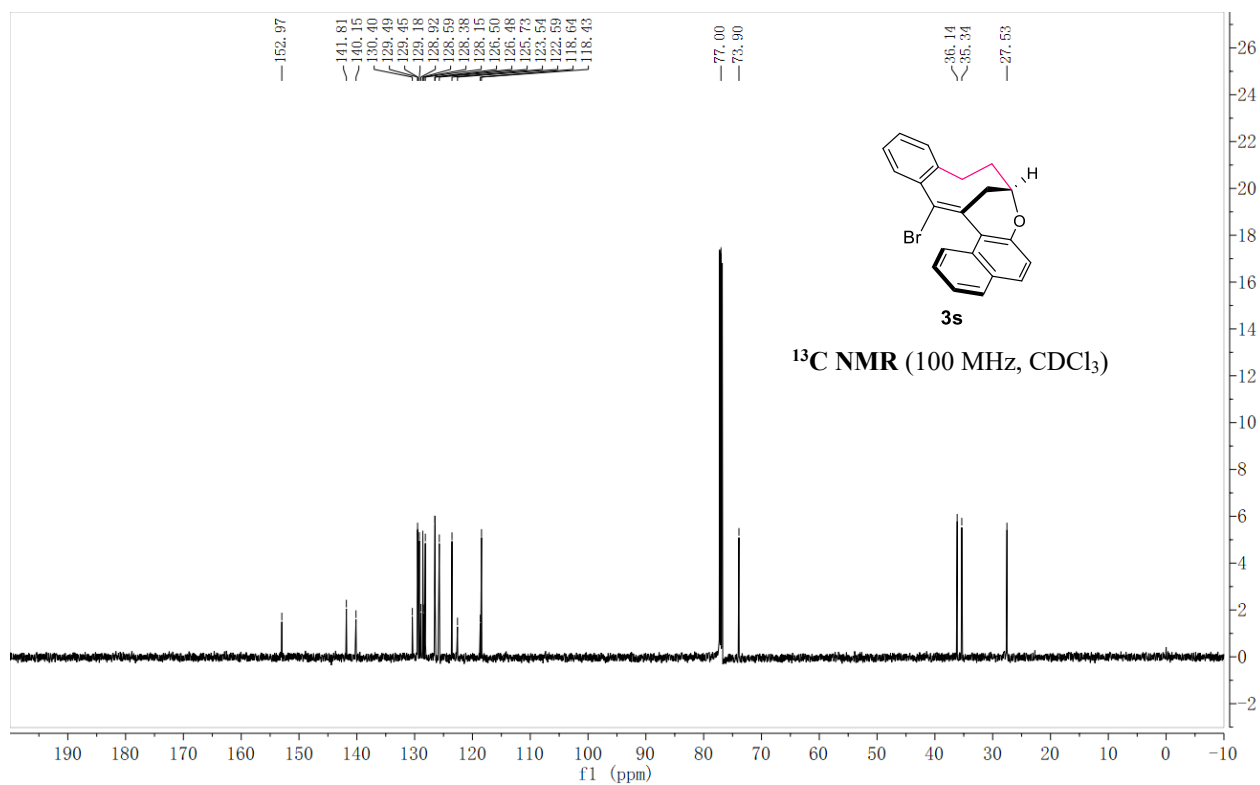

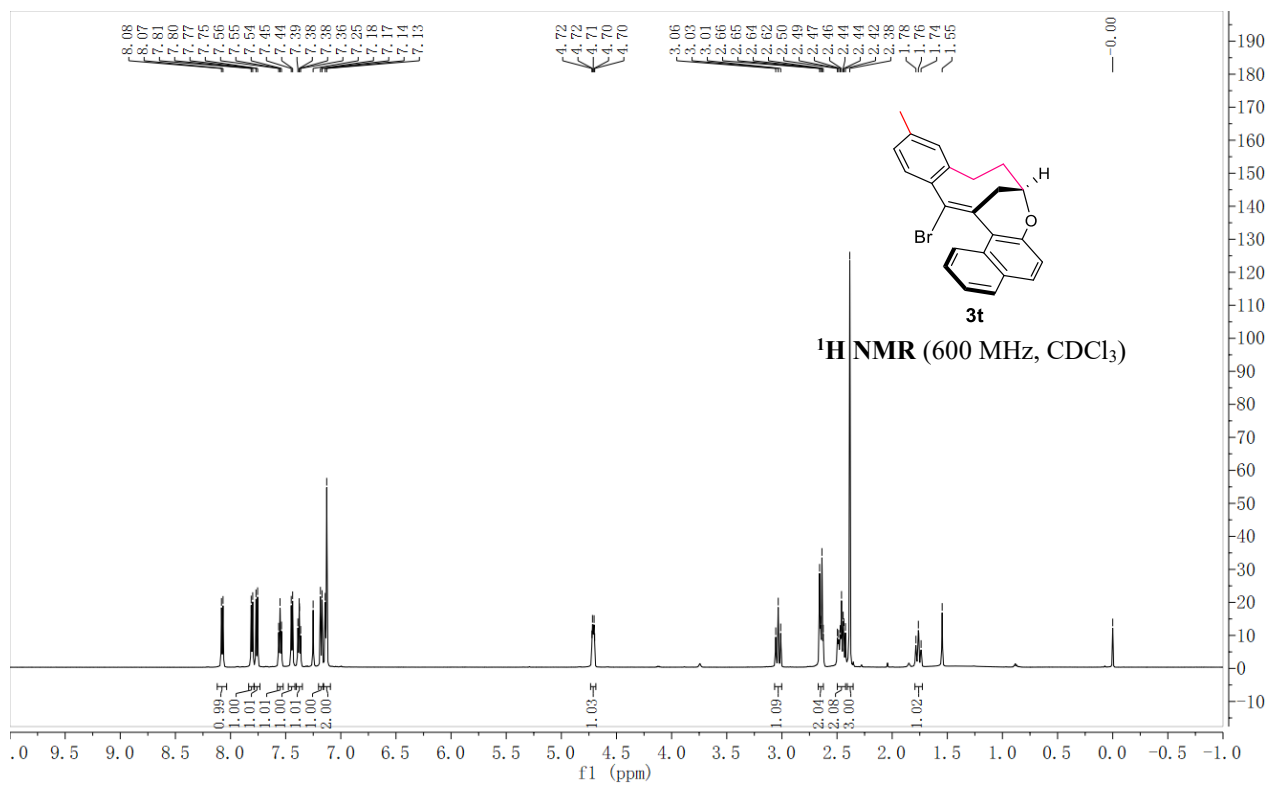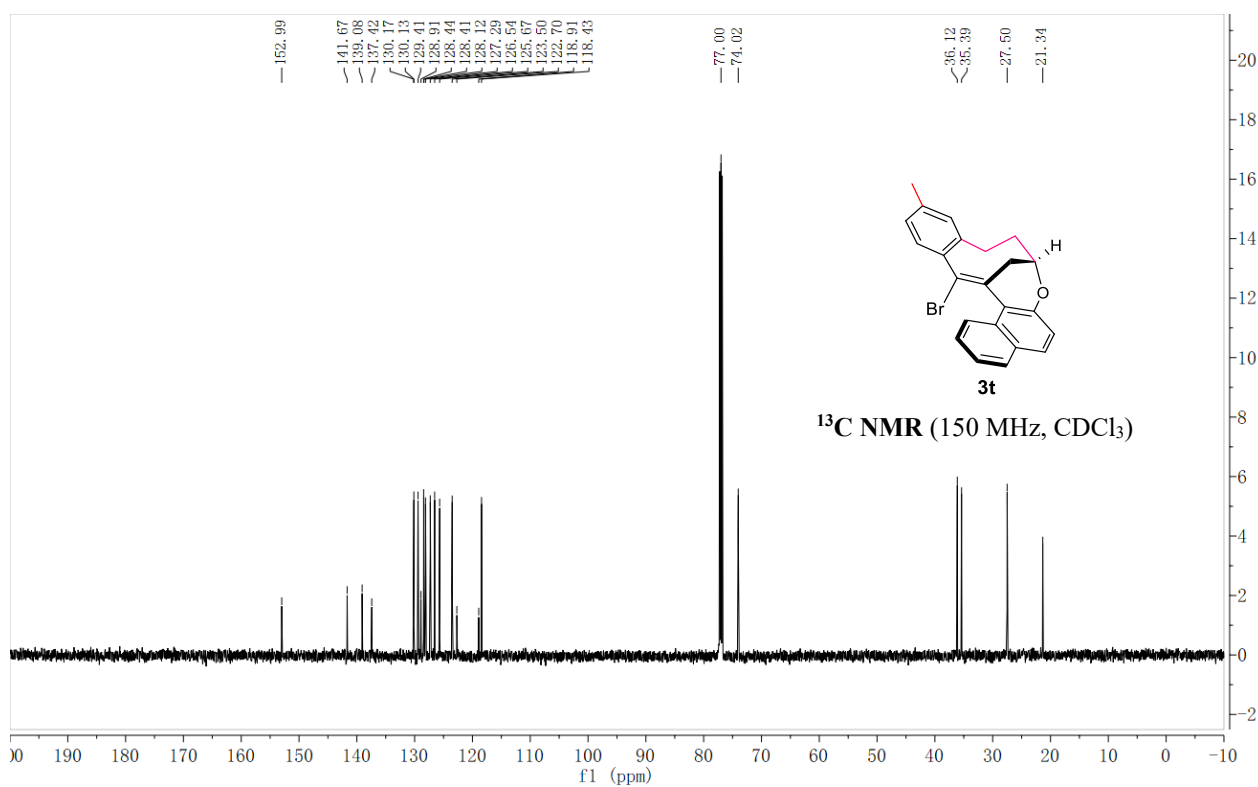



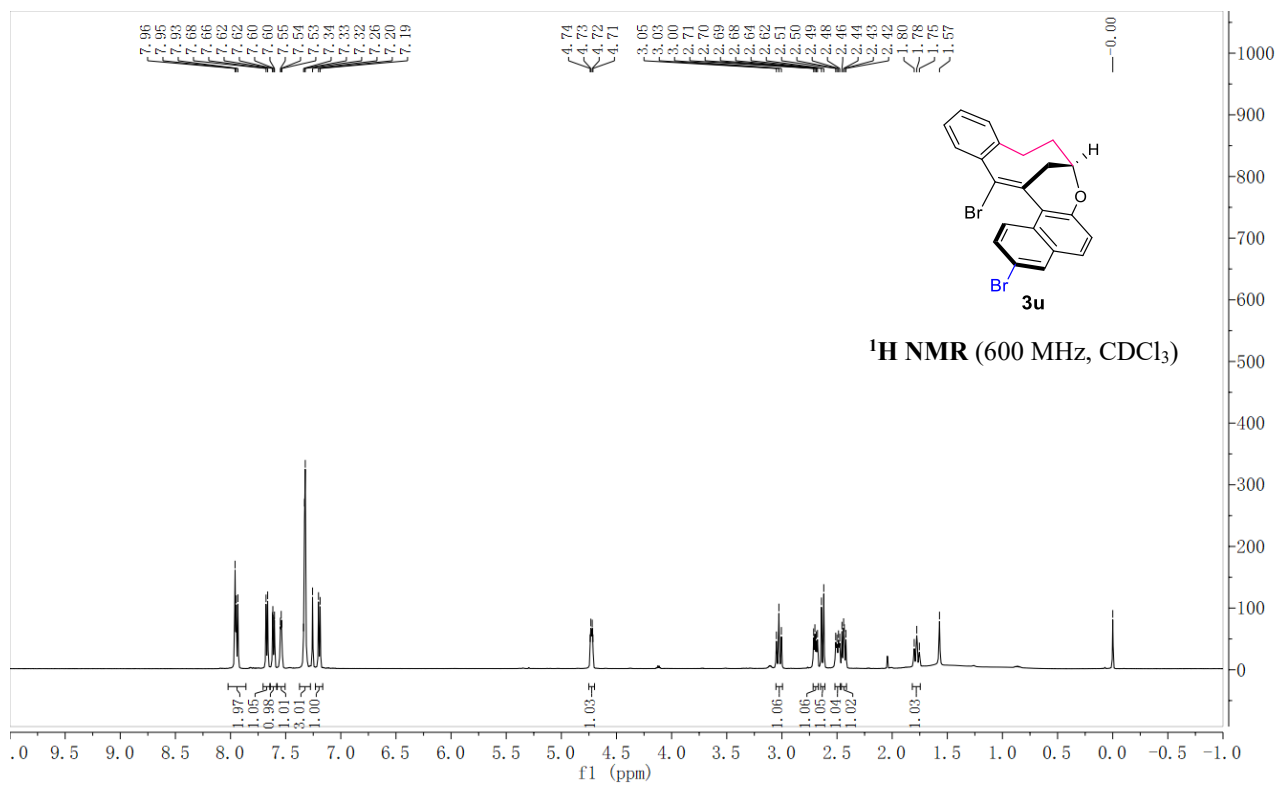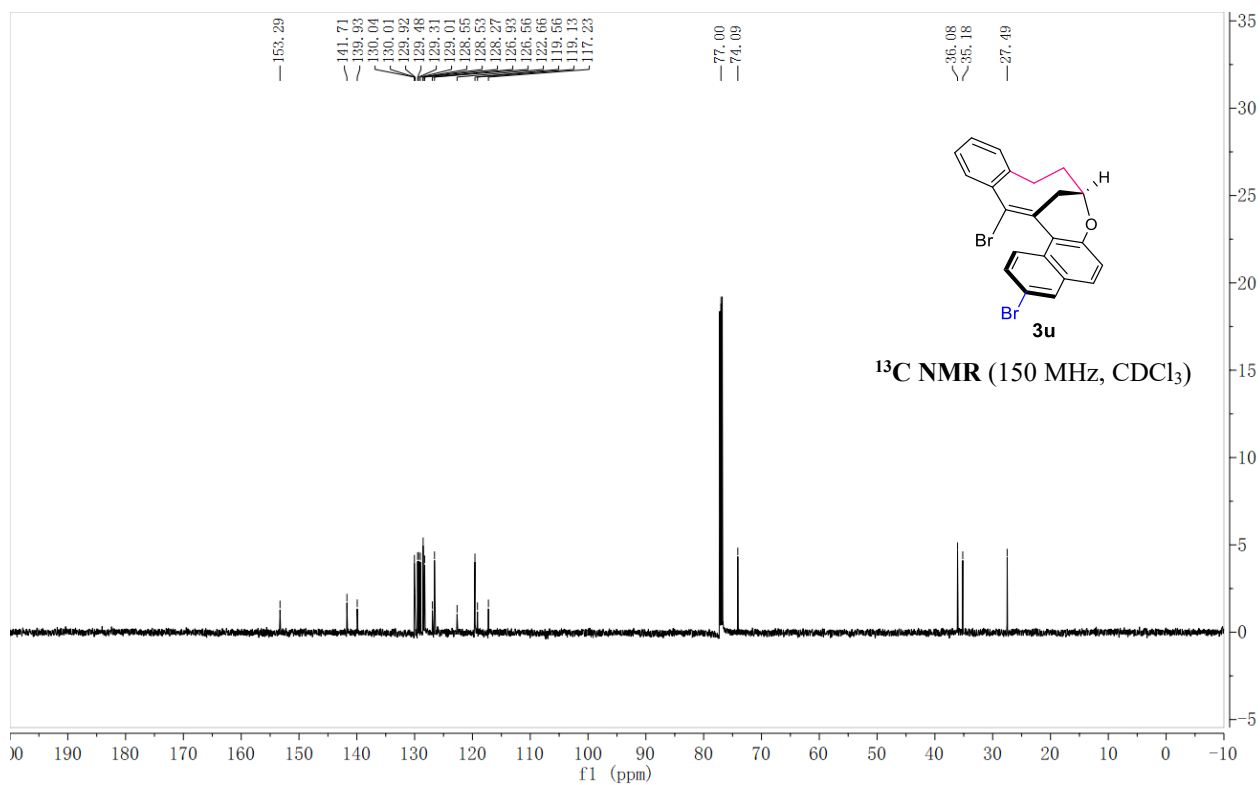

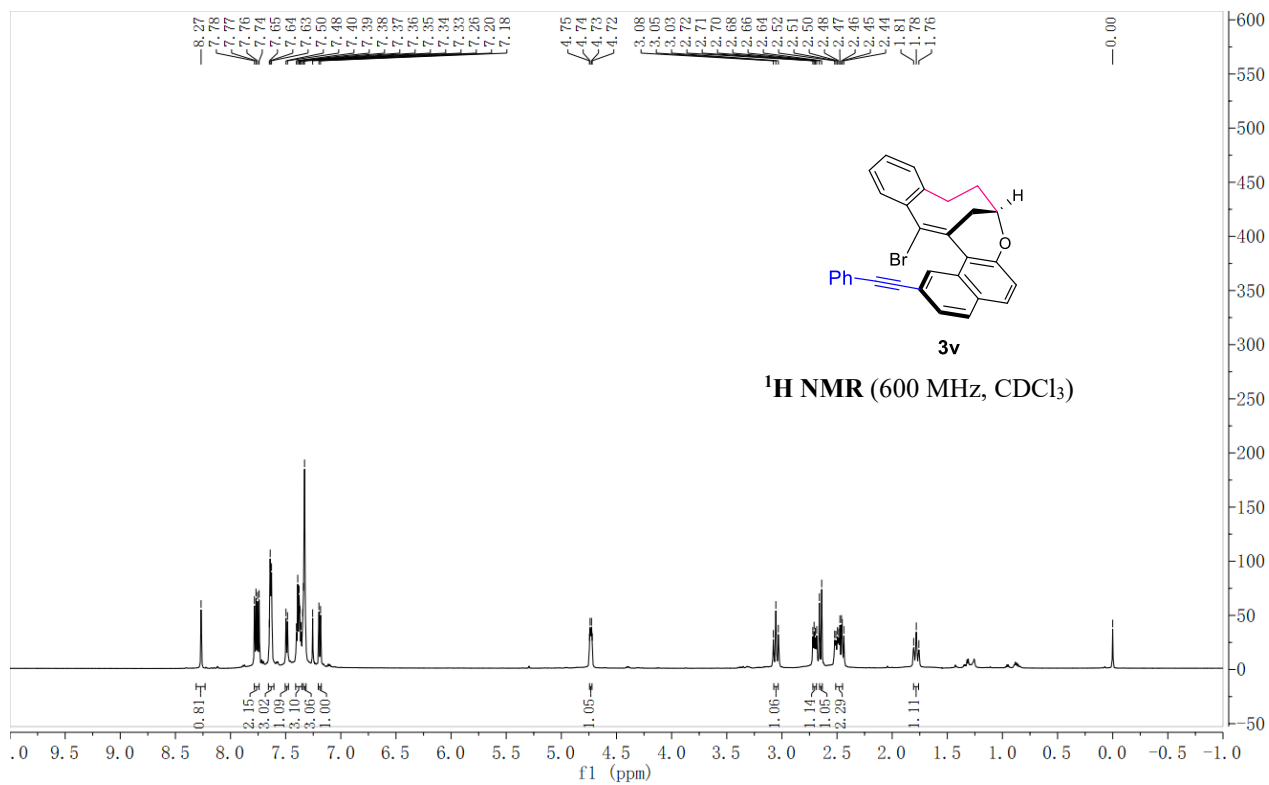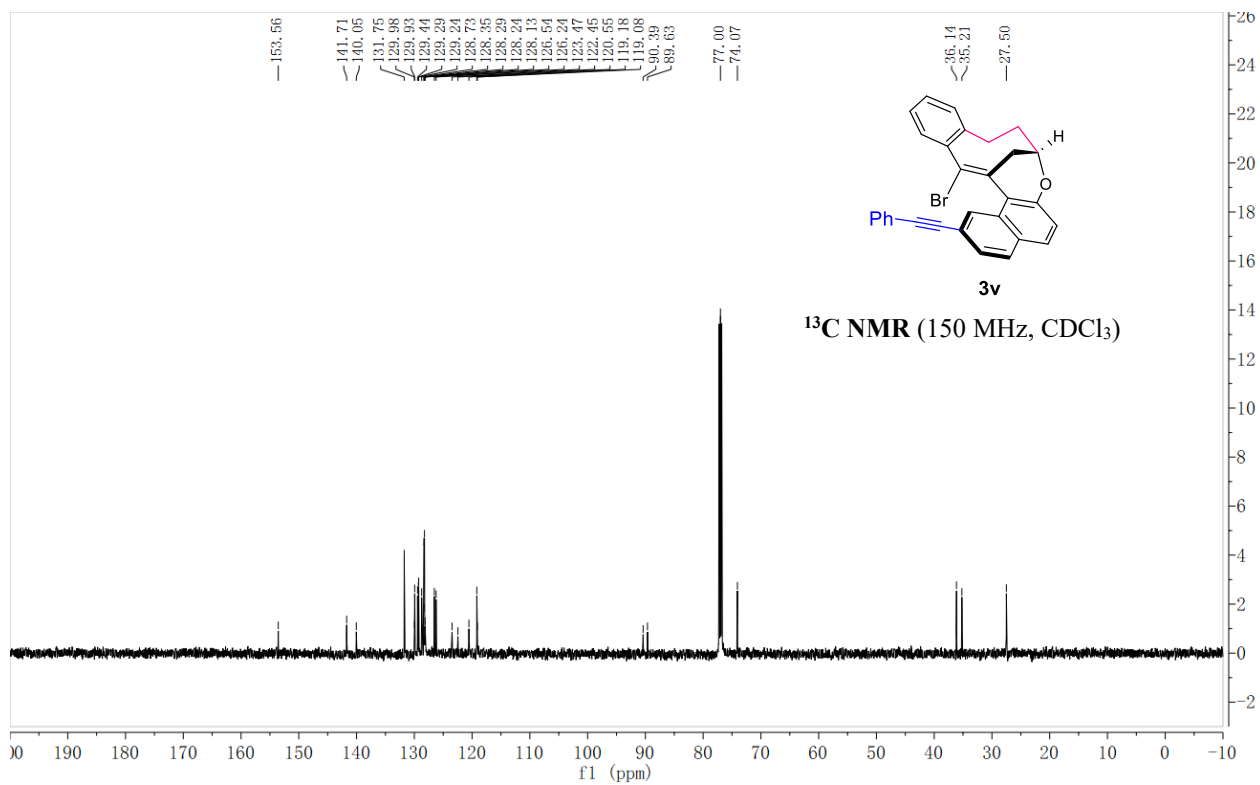

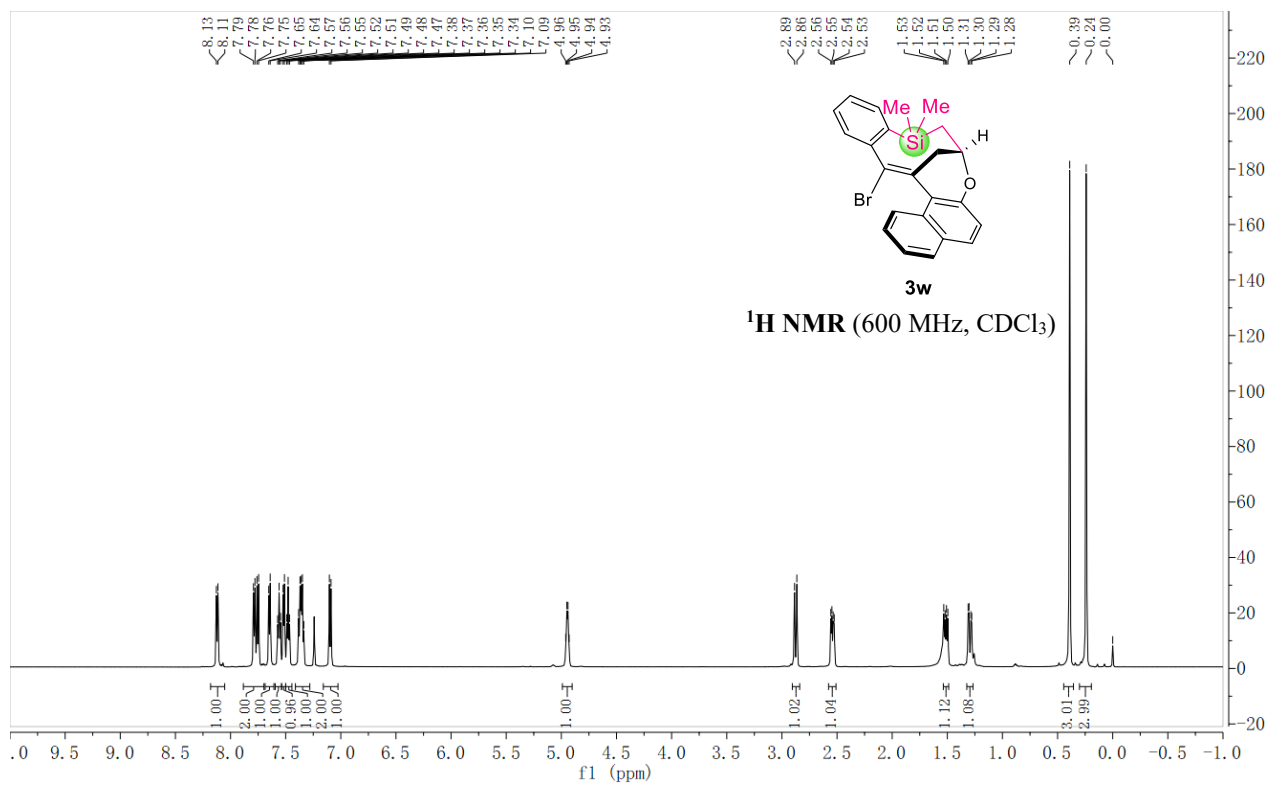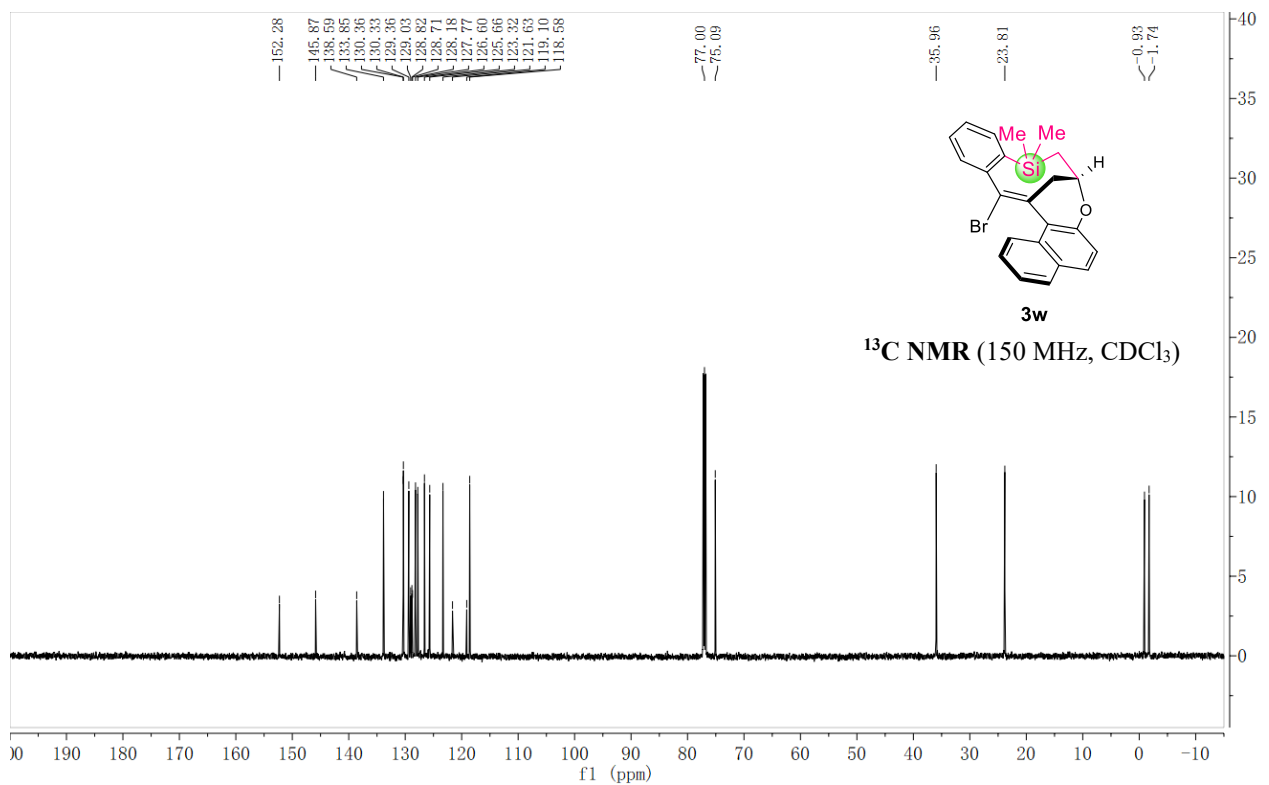

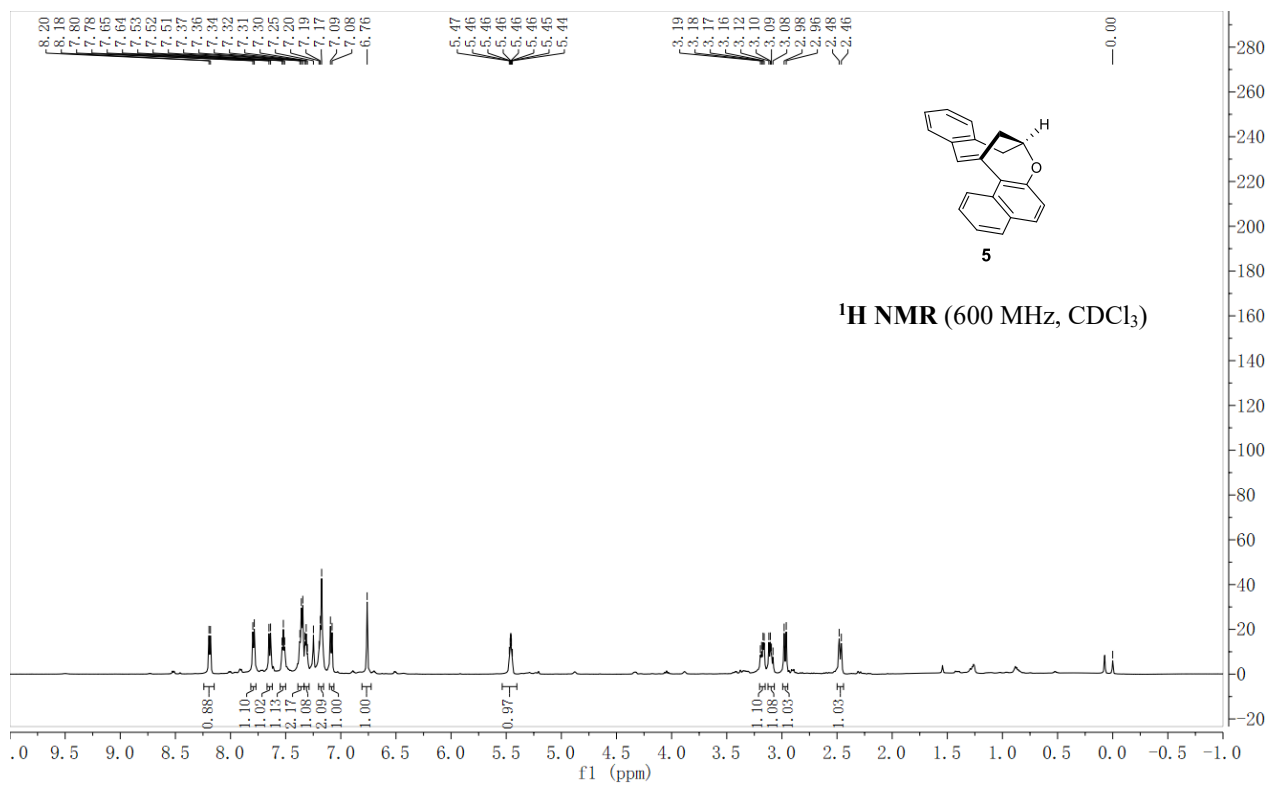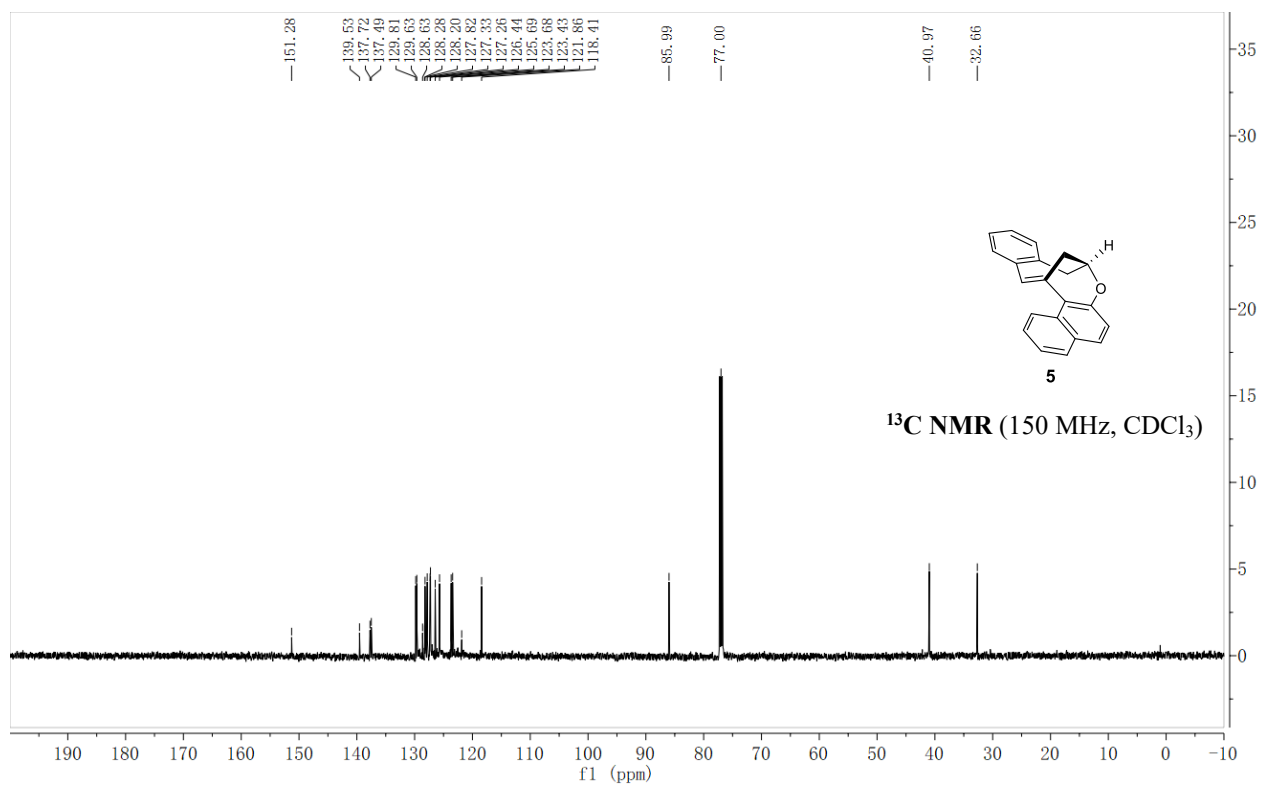

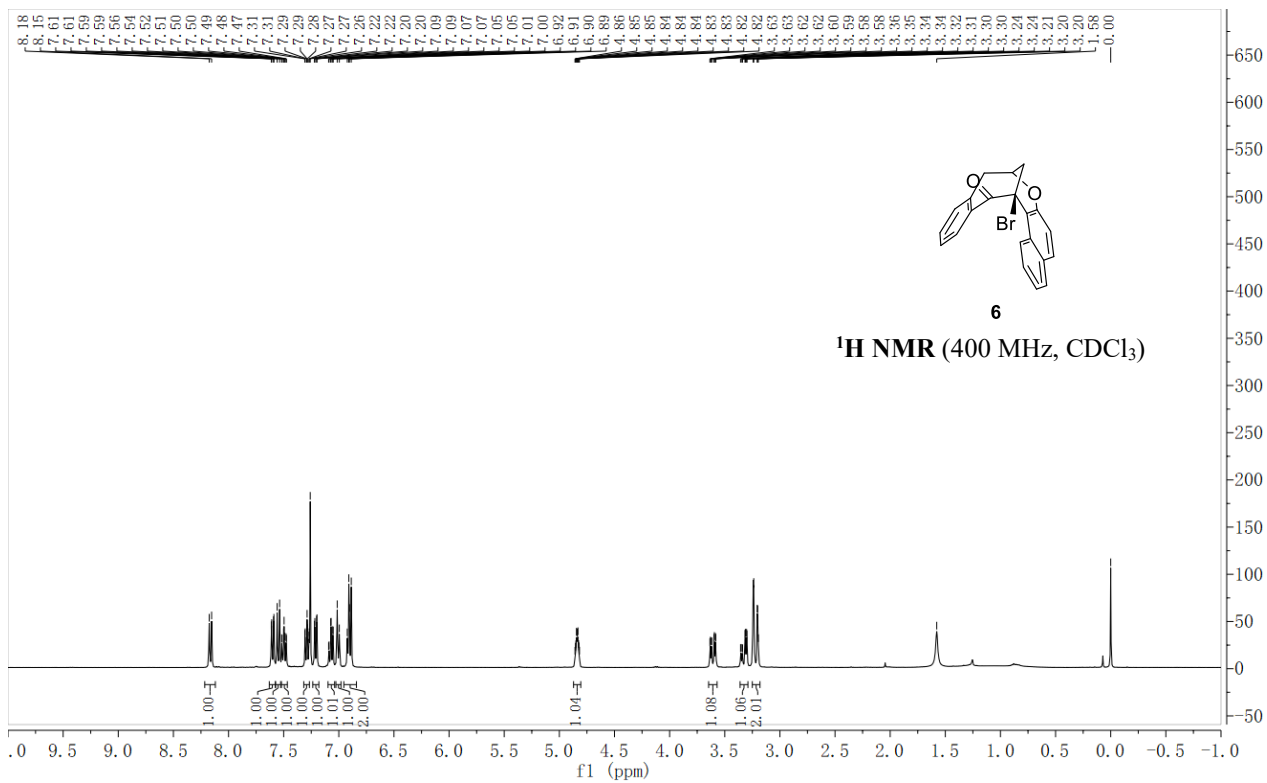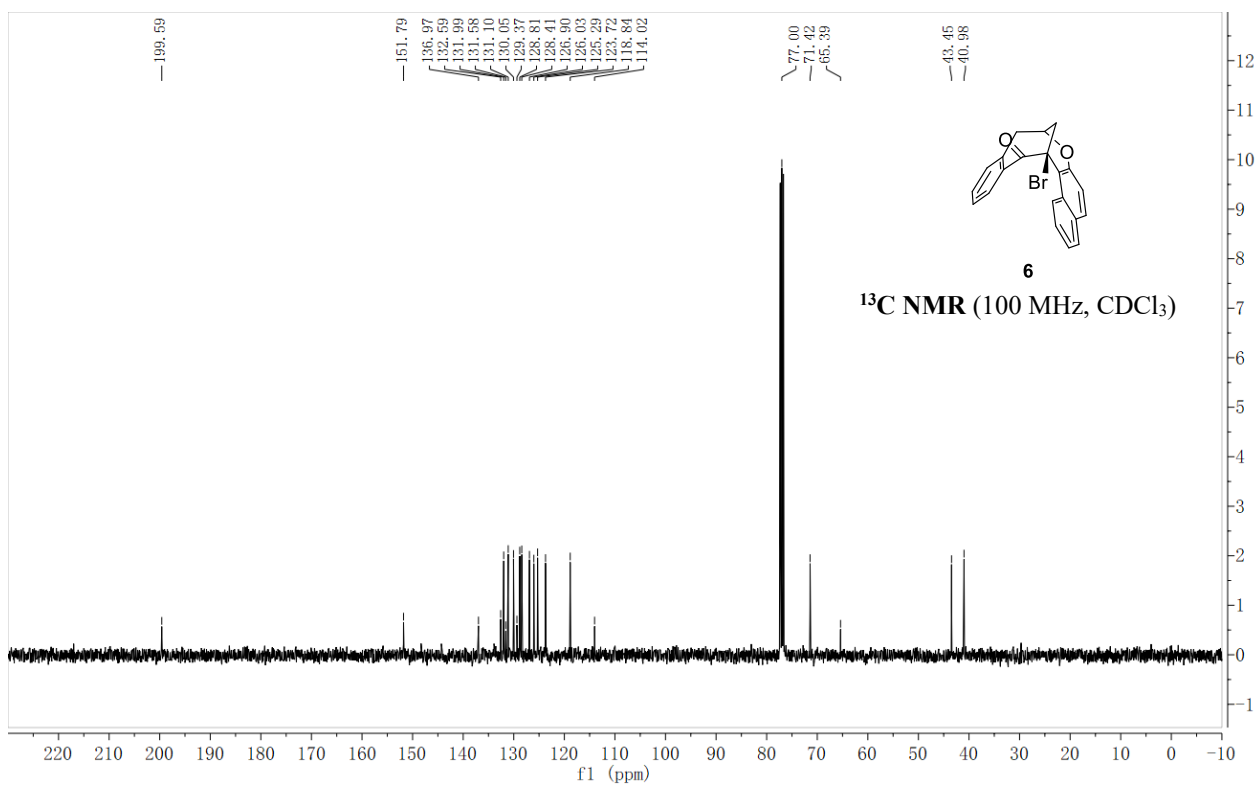

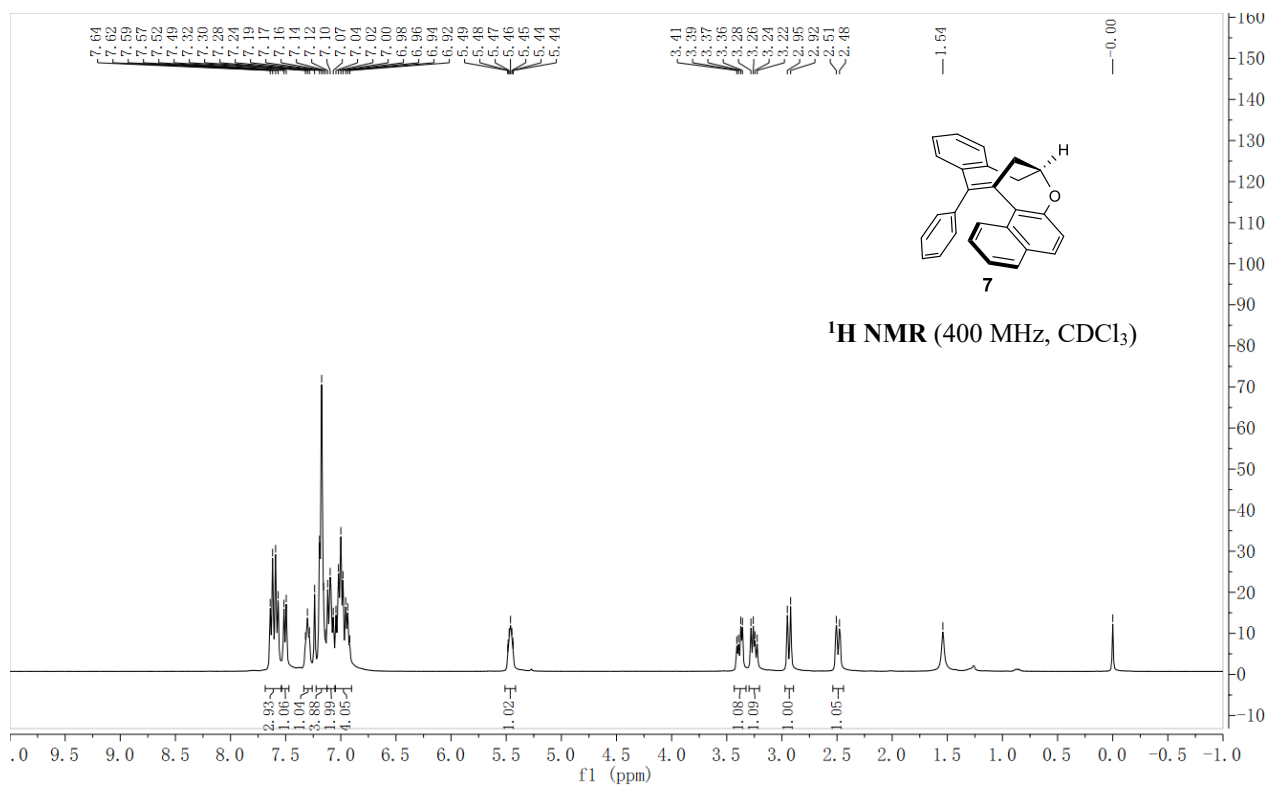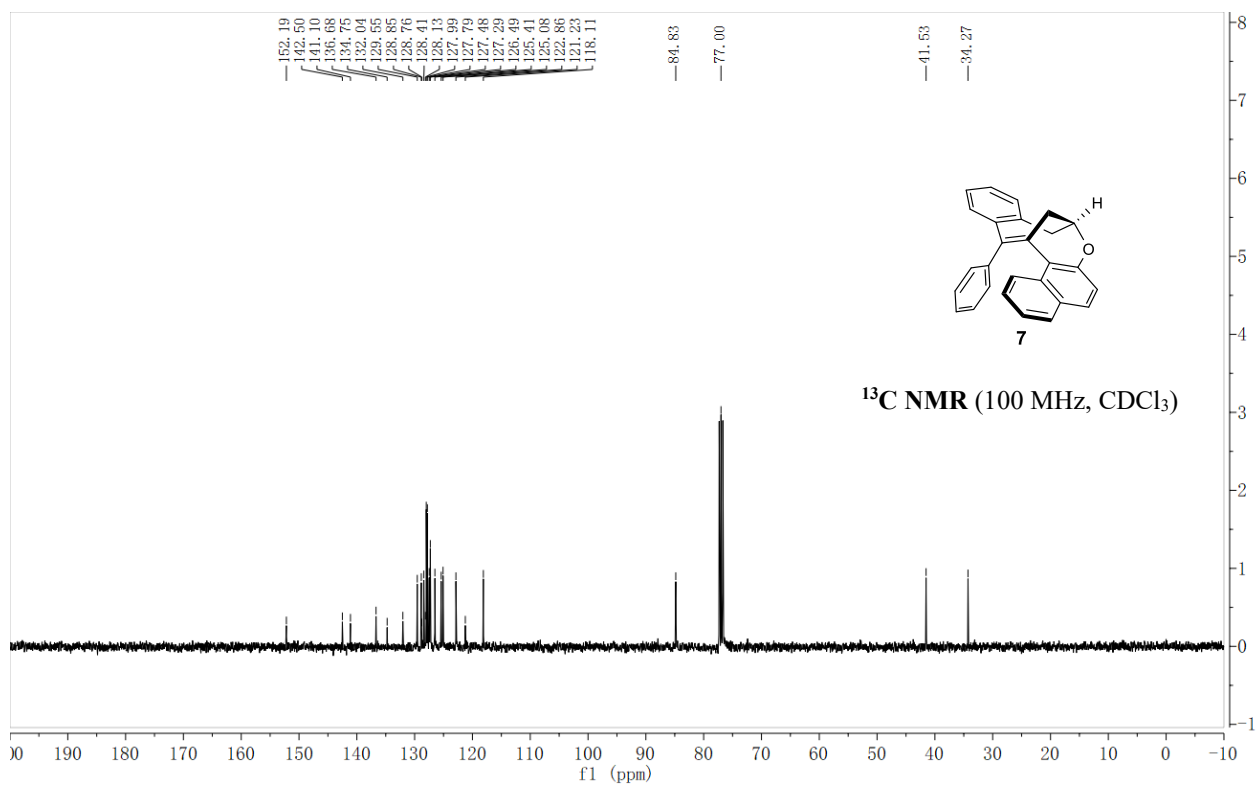

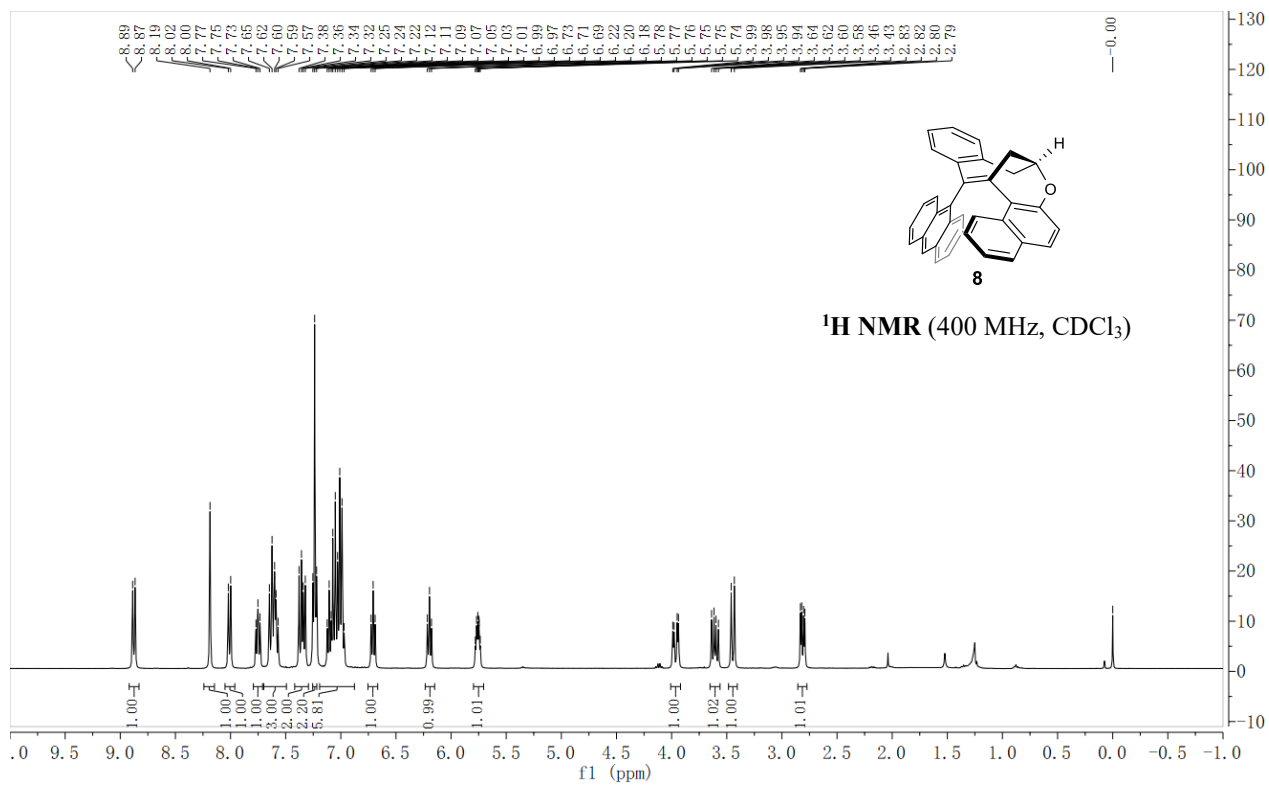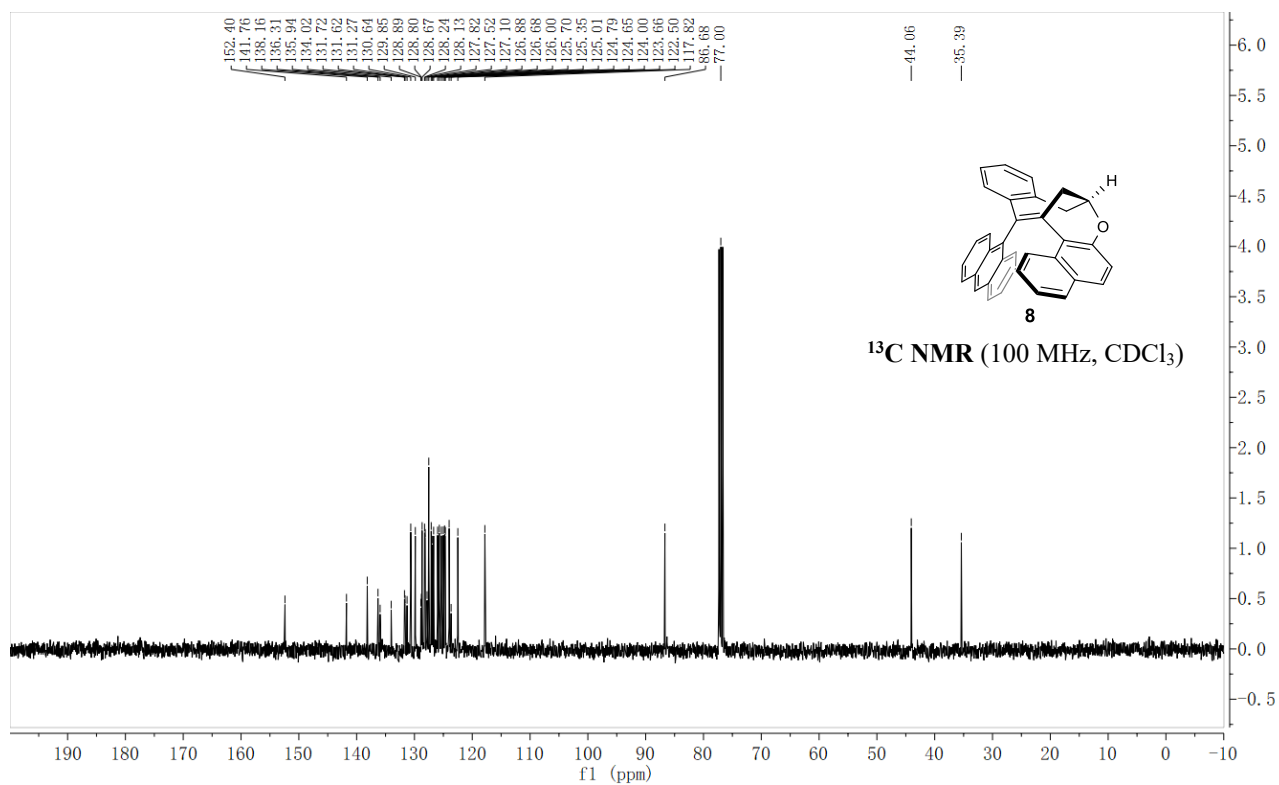

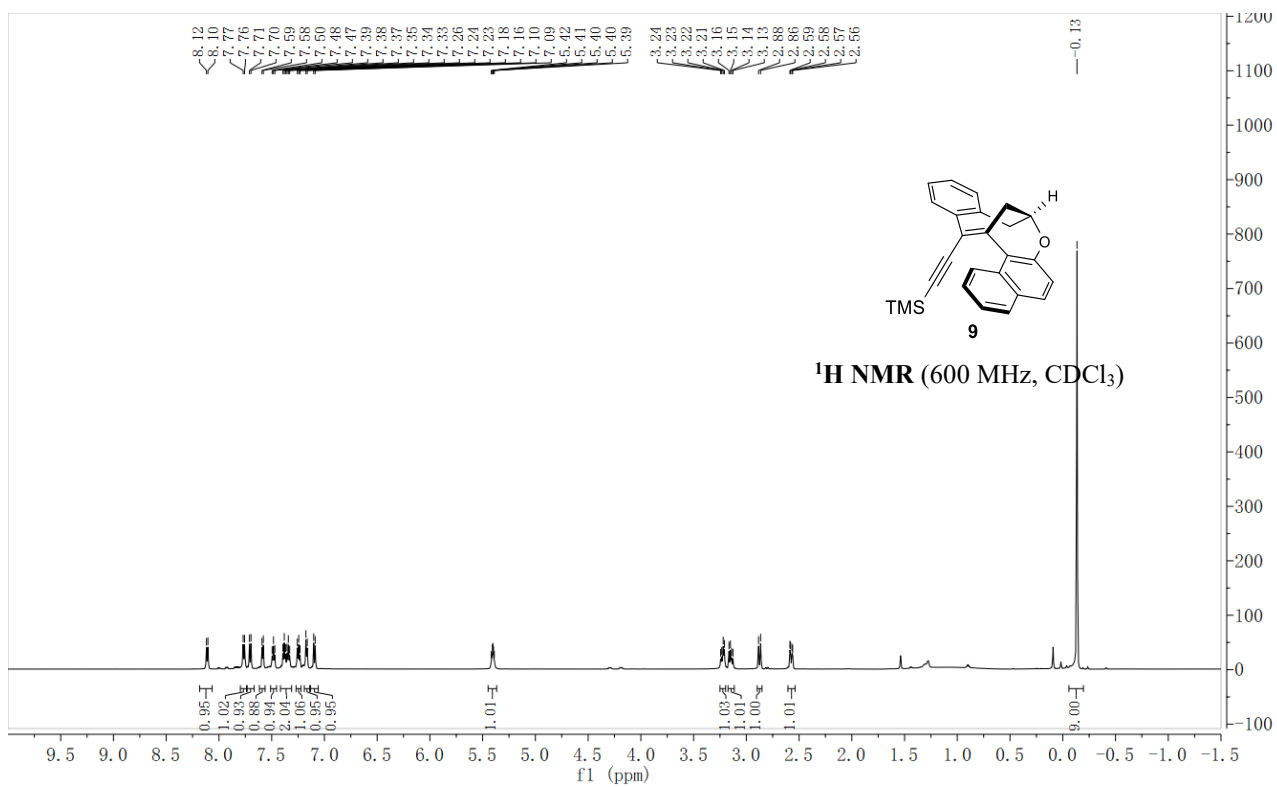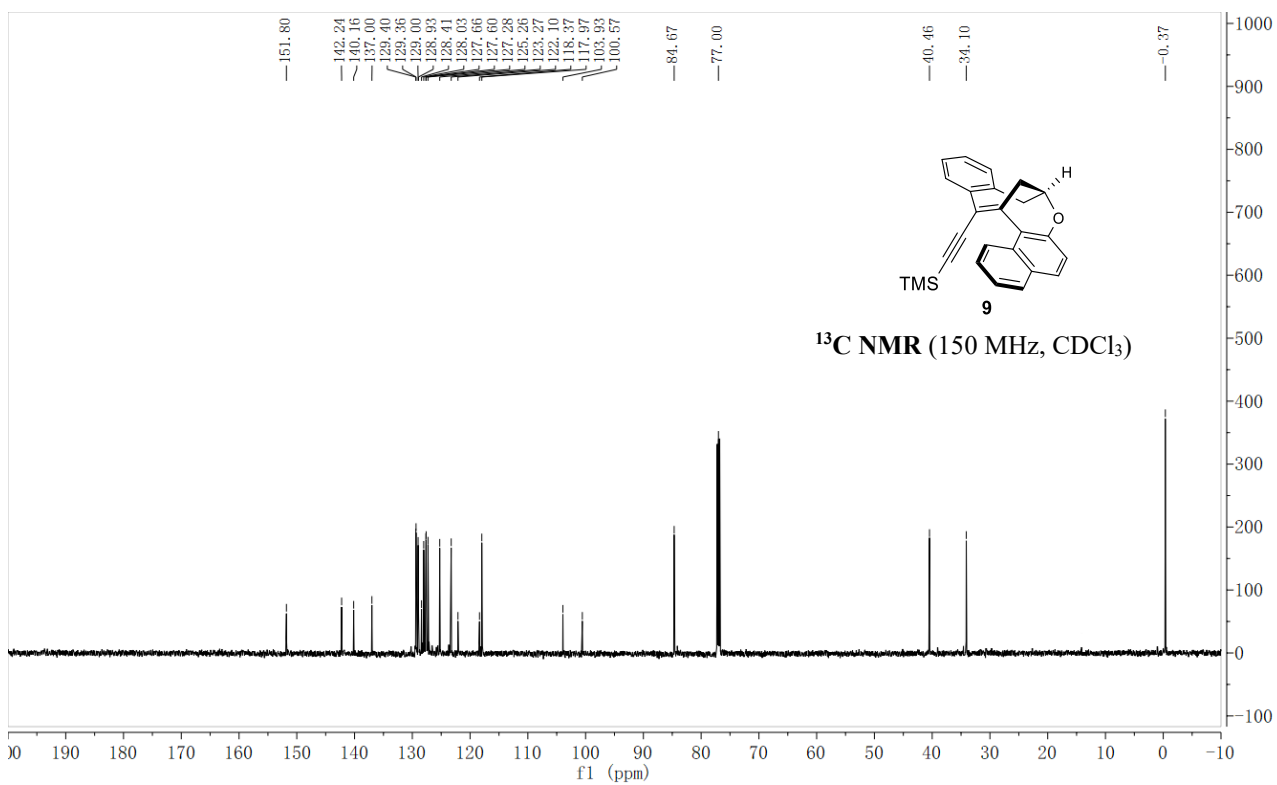



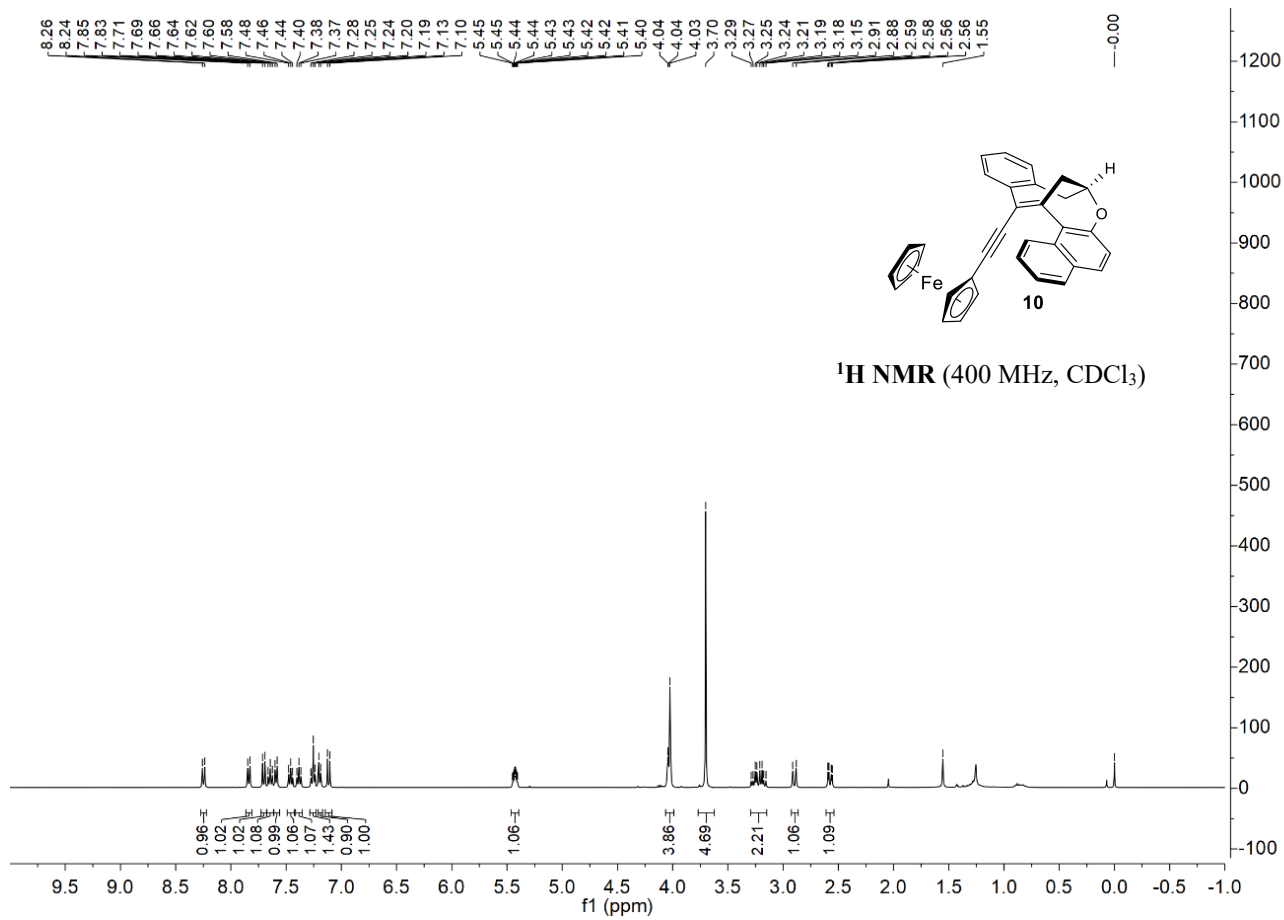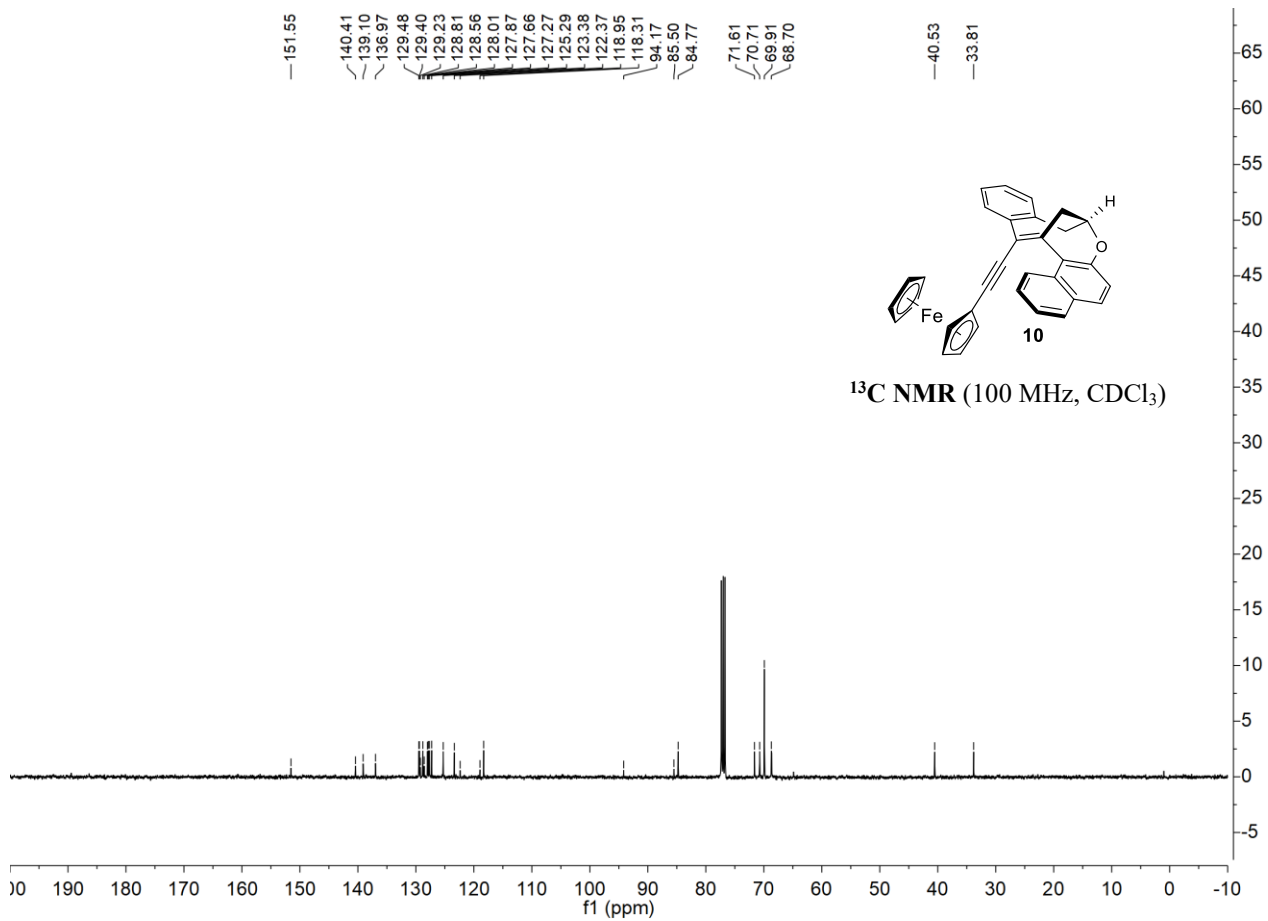

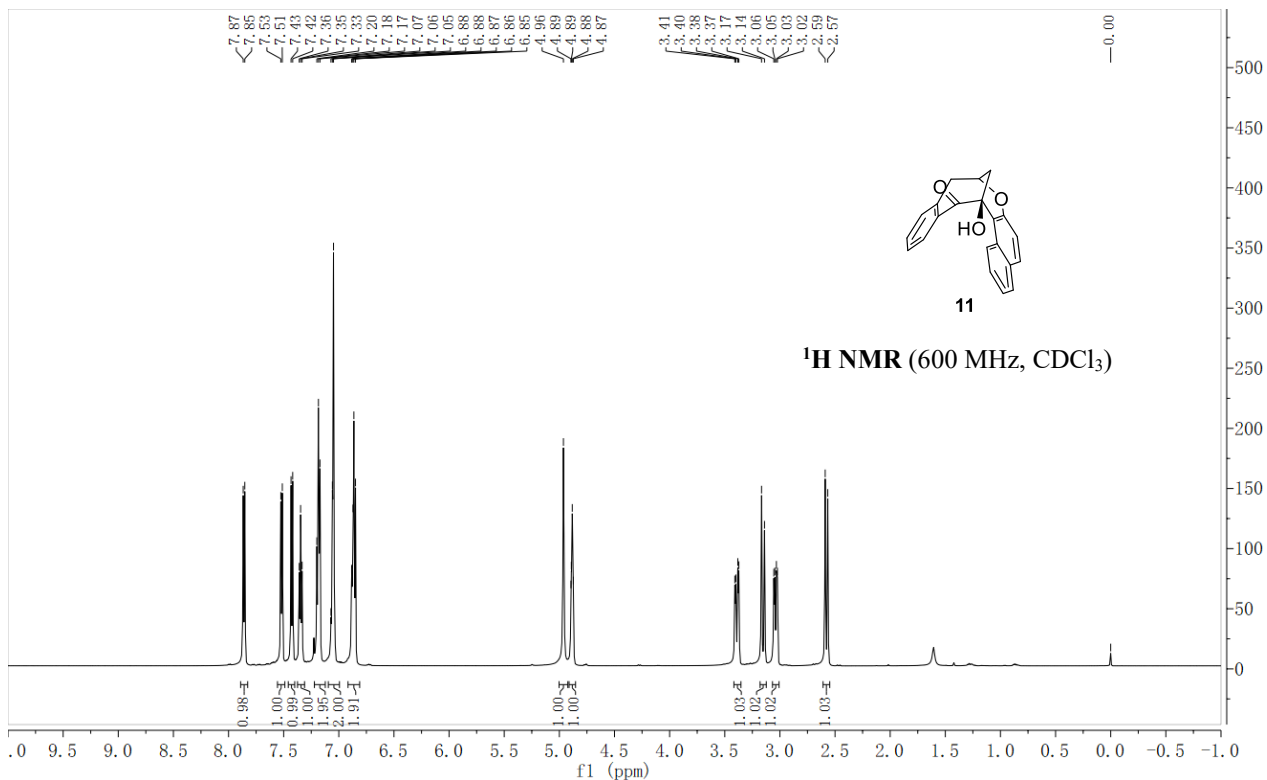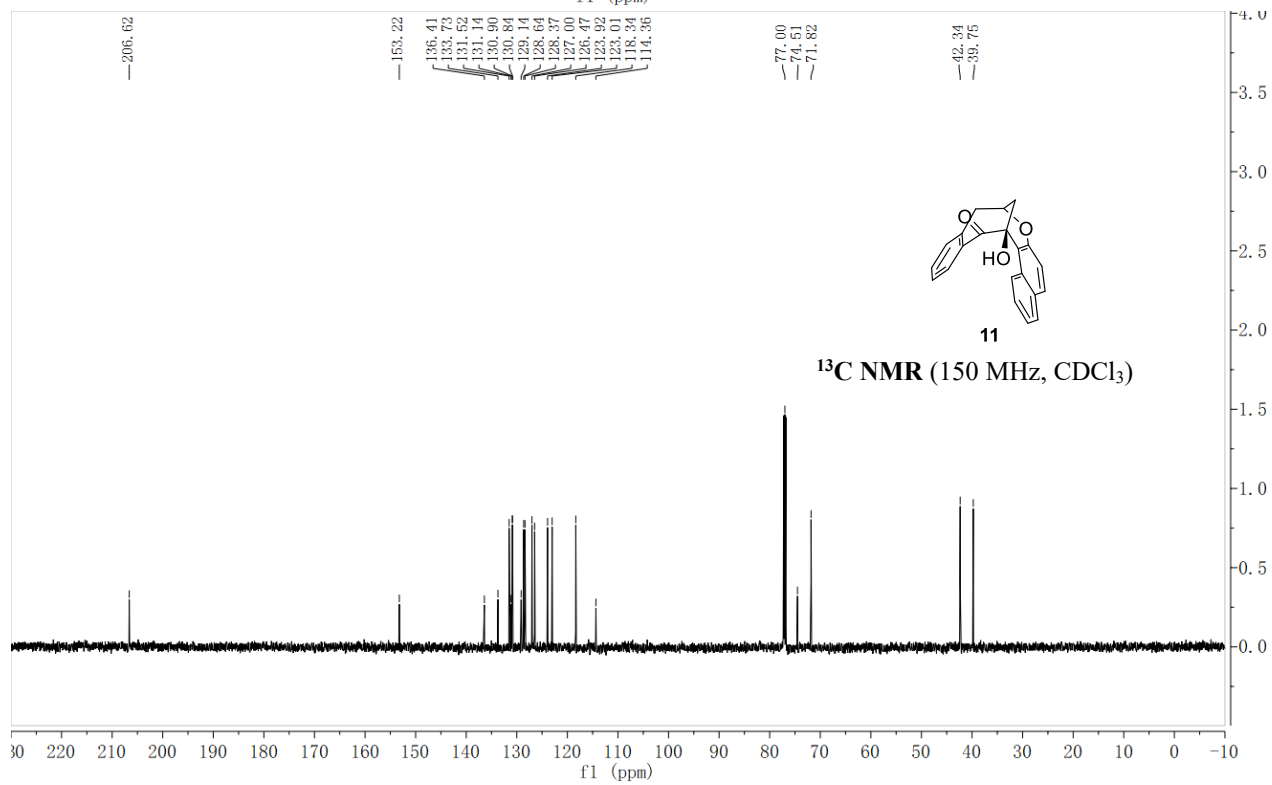

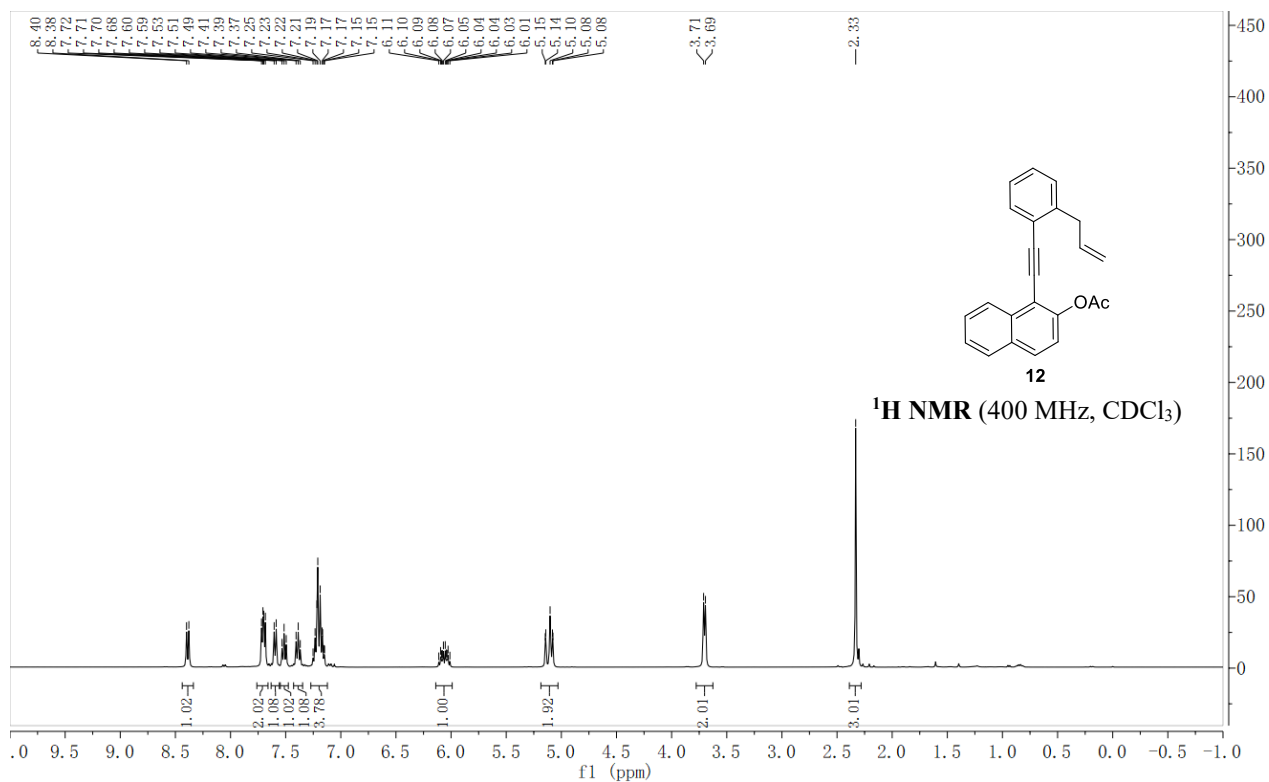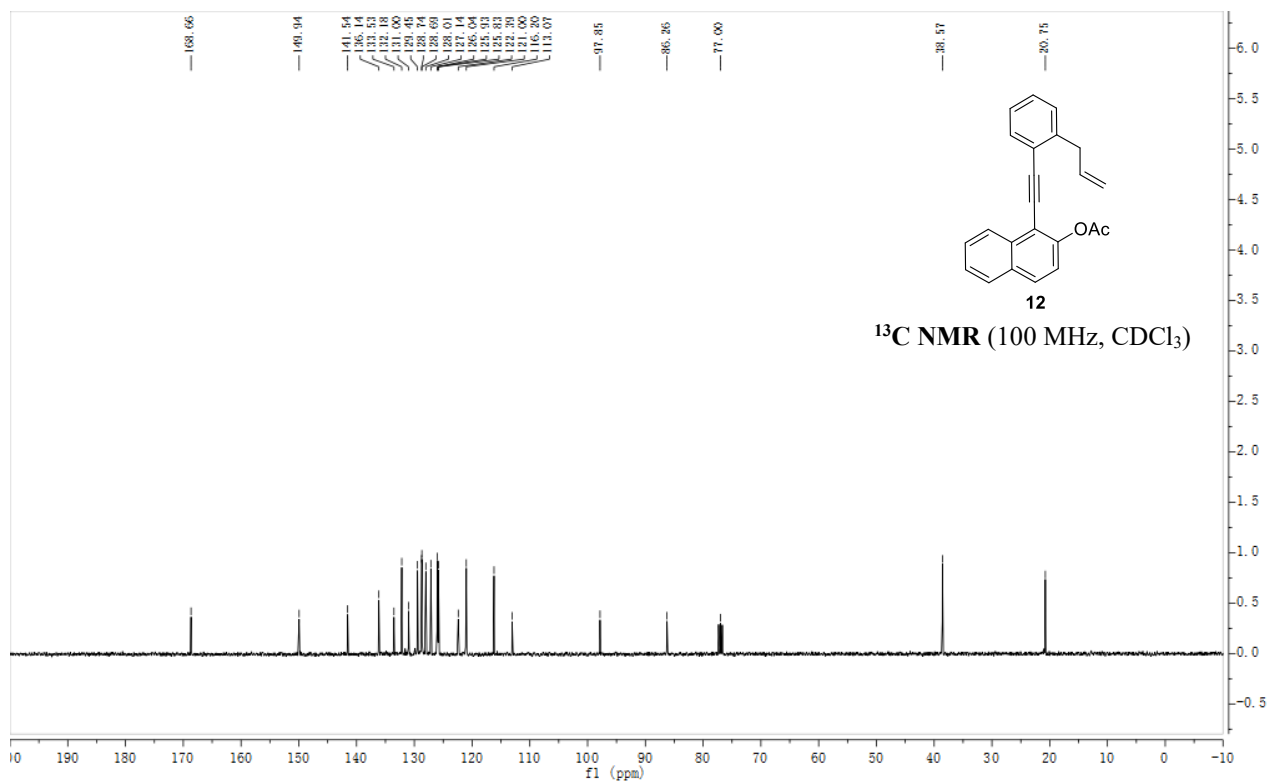



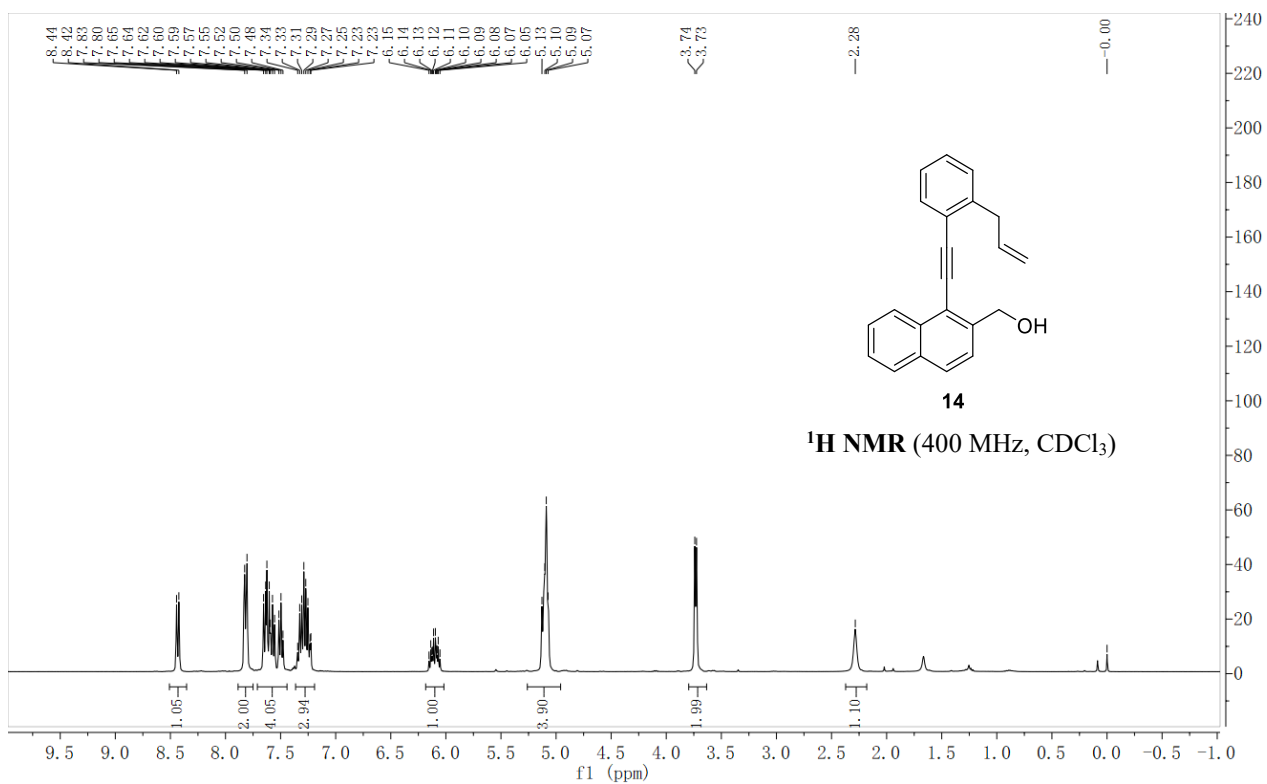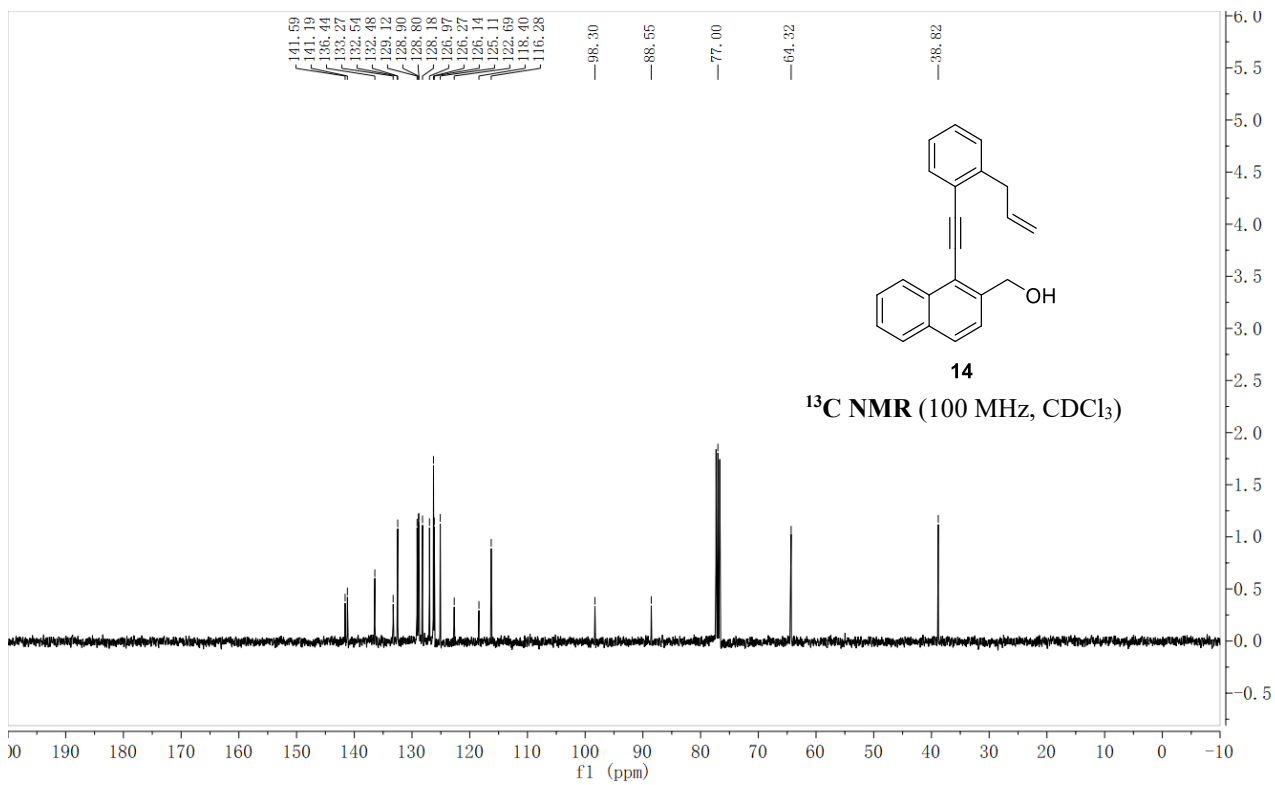

## XII. X-ray crystallographic information

The authors thank Mr. Xiangnan Gong (Analytical and Testing Center of Chongqing University) for spectroscopic measurements.

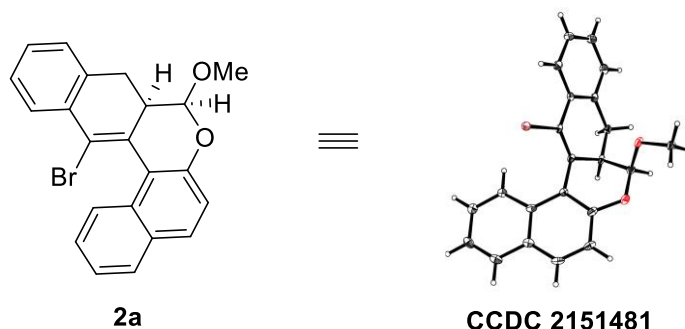

|                                         |                                                   |                                                                |              |
|-----------------------------------------|---------------------------------------------------|----------------------------------------------------------------|--------------|
| Bond precision:                         | C-C = 0.0096 Å                                    | Wavelength=0.71073                                             |              |
| Cell:                                   | a=28.1188(8)                                      | b=7.6926(2)                                                    | c=15.6637(5) |
| alpha=90                                | beta=92.223(3)                                    | gamma=90                                                       |              |
| Temperature:                            | 200 K                                             |                                                                |              |
|                                         | Calculated                                        | Reported                                                       |              |
| Volume                                  | 3385.61(17)                                       | 3385.61(17)                                                    |              |
| Space group                             | P 21/c                                            | P 1 21/c 1                                                     |              |
| Hall group                              | -P 2ybc                                           | -P 2ybc                                                        |              |
| Moiety formula                          | C <sub>22</sub> H <sub>17</sub> Br O <sub>2</sub> | 2(C <sub>22</sub> H <sub>17</sub> Br O <sub>2</sub> )          |              |
| Sum formula                             | C <sub>22</sub> H <sub>17</sub> Br O <sub>2</sub> | C <sub>44</sub> H <sub>34</sub> Br <sub>2</sub> O <sub>4</sub> |              |
| Mr                                      | 393.26                                            | 786.53                                                         |              |
| Dx, g cm <sup>-3</sup>                  | 1.543                                             | 1.543                                                          |              |
| Z                                       | 8                                                 | 4                                                              |              |
| Mu (mm <sup>-1</sup> )                  | 2.441                                             | 2.441                                                          |              |
| F <sub>000</sub>                        | 1600.0                                            | 1600.0                                                         |              |
| F <sub>000</sub> '                      | 1598.34                                           |                                                                |              |
| h,k,lmax                                | 38,10,21                                          | 37,10,21                                                       |              |
| Nref                                    | 9036                                              | 8072                                                           |              |
| Tmin,Tmax                               | 0.500,0.584                                       | b 0.758,1.000                                                  |              |
| Tmin'                                   | 0.465                                             |                                                                |              |
| Correction method= # Reported T Limits: | Tmin=0.758 Tmax=1.000                             |                                                                |              |
| AbsCorr = MULTI-SCAN                    |                                                   |                                                                |              |
| Data completeness= 0.893                |                                                   | Theta(max)= 29.036                                             |              |
| R(reflections)= 0.0781( 6205)           |                                                   | wR2(reflections)=0.1771( 8072)                                 |              |
| S = 1.151                               | Npar= 453                                         |                                                                |              |

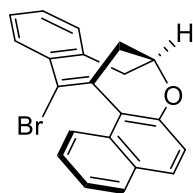

**3a**

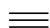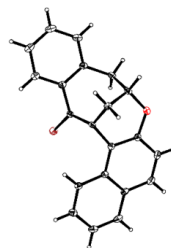

**CCDC 2151484**

|                                                               |                                      |                                      |
|---------------------------------------------------------------|--------------------------------------|--------------------------------------|
| Bond precision:                                               | C-C = 0.0040 Å                       | Wavelength=0.71073                   |
| Cell:                                                         | a=15.1076(5)                         | b=10.0376(5)      c=20.6682(10)      |
| alpha=90                                                      | beta=90                              | gamma=90                             |
| Temperature:                                                  | 293 K                                |                                      |
|                                                               | Calculated                           | Reported                             |
| Volume                                                        | 3134.2(2)                            | 3134.2(2)                            |
| Space group                                                   | P b c a                              | P b c a                              |
| Hall group                                                    | -P 2ac 2ab                           | -P 2ac 2ab                           |
| Moiety formula                                                | C <sub>21</sub> H <sub>15</sub> Br O | C <sub>21</sub> H <sub>15</sub> Br O |
| Sum formula                                                   | C <sub>21</sub> H <sub>15</sub> Br O | C <sub>21</sub> H <sub>15</sub> Br O |
| Mr                                                            | 363.23                               | 363.24                               |
| Dx,g cm <sup>-3</sup>                                         | 1.540                                | 1.540                                |
| Z                                                             | 8                                    | 8                                    |
| Mu (mm <sup>-1</sup> )                                        | 2.625                                | 2.625                                |
| F <sub>000</sub>                                              | 1472.0                               | 1472.0                               |
| F <sub>000</sub> '                                            | 1470.26                              |                                      |
| h,k,lmax                                                      | 20,13,28                             | 20,13,27                             |
| Nref                                                          | 4202                                 | 3707                                 |
| Tmin,Tmax                                                     | 0.437,0.467                          | 0.970,1.000                          |
| Tmin'                                                         | 0.404                                |                                      |
| Correction method= # Reported T Limits: Tmin=0.970 Tmax=1.000 |                                      |                                      |
| AbsCorr = MULTI-SCAN                                          |                                      |                                      |
| Data completeness= 0.882                                      |                                      | Theta(max)= 29.094                   |
| R(reflections)= 0.0391( 2444)                                 |                                      | wR2(reflections) = 0.0899( 3707)     |
| S = 1.038                                                     |                                      | Npar= 208                            |

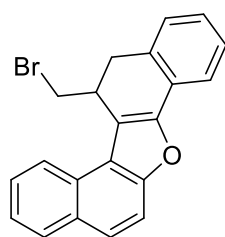

**4a**

≡

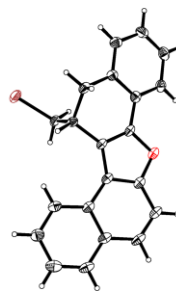

**CCDC 2151483**

|                                                               |                                      |                                      |               |
|---------------------------------------------------------------|--------------------------------------|--------------------------------------|---------------|
| Bond precision:                                               | C-C = 0.0083 Å                       | Wavelength=0.71073                   |               |
| Cell:                                                         | a=7.8805(4)                          | b=11.2373(4)                         | c=17.8564(12) |
| alpha=90                                                      | beta=90                              | gamma=90                             |               |
| Temperature:                                                  | 293 K                                |                                      |               |
|                                                               | Calculated                           | Reported                             |               |
| Volume                                                        | 1581.28(14)                          | 1581.28(14)                          |               |
| Space group                                                   | P 21 21 21                           | P 21 21 21                           |               |
| Hall group                                                    | P 2ac 2ab                            | P 2ac 2ab                            |               |
| Moiety formula                                                | C <sub>21</sub> H <sub>15</sub> Br O | C <sub>21</sub> H <sub>15</sub> Br O |               |
| Sum formula                                                   | C <sub>21</sub> H <sub>15</sub> Br O | C <sub>21</sub> H <sub>15</sub> Br O |               |
| Mr                                                            | 363.23                               | 363.24                               |               |
| Dx,g cm <sup>-3</sup>                                         | 1.526                                | 1.526                                |               |
| Z                                                             | 4                                    | 4                                    |               |
| Mu (mm <sup>-1</sup> )                                        | 2.601                                | 2.601                                |               |
| F000                                                          | 736.0                                | 736.0                                |               |
| F000'                                                         | 735.13                               |                                      |               |
| h,k,lmax                                                      | 10,15,24                             | 10,15,22                             |               |
| Nref                                                          | 4242[ 2425]                          | 3598                                 |               |
| Tmin,Tmax                                                     | 0.358,0.424                          | 0.770,1.000                          |               |
| Tmin'                                                         | 0.331                                |                                      |               |
| Correction method= # Reported T Limits: Tmin=0.770 Tmax=1.000 |                                      |                                      |               |
| AbsCorr = MULTI-SCAN                                          |                                      |                                      |               |
| Data completeness= 1.48/0.85                                  |                                      | Theta(max)= 29.096                   |               |
| R(reflections)= 0.0487( 2126)                                 |                                      | wR2(reflections) = 0.1007( 3598)     |               |
| S = 0.981                                                     |                                      | Npar= 208                            |               |



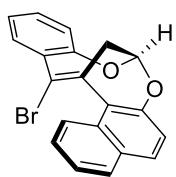

**3o (3a-3)**

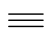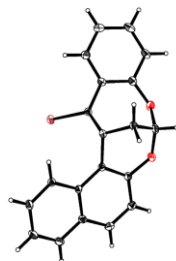

**CCDC 2151485**

|                                    |                                                   |                                                   |
|------------------------------------|---------------------------------------------------|---------------------------------------------------|
| Bond precision:                    | C-C = 0.0076 Å                                    | Wavelength=0.71073                                |
| Cell:                              | a=8.0085(3)                                       | b=8.9848(6) c=21.0224(11)                         |
| alpha=90                           | beta=90                                           | gamma=90                                          |
| Temperature:                       | 295 K                                             |                                                   |
|                                    | Calculated                                        | Reported                                          |
| Volume                             | 1512.66(14)                                       | 1512.66(15)                                       |
| Space group                        | P 21 21 21                                        | P 21 21 21                                        |
| Hall group                         | P 2ac 2ab                                         | P 2ac 2ab                                         |
| Moiety formula                     | C <sub>20</sub> H <sub>13</sub> Br O <sub>2</sub> | C <sub>20</sub> H <sub>13</sub> Br O <sub>2</sub> |
| Sum formula                        | C <sub>20</sub> H <sub>13</sub> Br O <sub>2</sub> | C <sub>20</sub> H <sub>13</sub> Br O <sub>2</sub> |
| Mr                                 | 365.20                                            | 365.21                                            |
| D <sub>x</sub> ,g cm <sup>-3</sup> | 1.604                                             | 1.604                                             |
| Z                                  | 4                                                 | 4                                                 |
| Mu (mm <sup>-1</sup> )             | 2.725                                             | 2.725                                             |
| F <sub>000</sub>                   | 736.0                                             | 736.0                                             |
| F <sub>000</sub> '                 | 735.16                                            |                                                   |
| h,k,lmax                           | 10,12,28                                          | 10,11,28                                          |
| Nref                               | 4032[ 2317]                                       | 3463                                              |
| Tmin,Tmax                          | 0.435,0.596                                       | 0.776,1.000                                       |
| Tmin'                              | 0.402                                             |                                                   |
| Correction method=                 | # Reported T Limits: Tmin=0.776 Tmax=1.000        |                                                   |
| AbsCorr =                          | MULTI-SCAN                                        |                                                   |
| Data completeness=                 | 1.49/0.86                                         | Theta(max)= 29.044                                |
| R(reflections)=                    | 0.0439( 2759)                                     | wR2(reflections) = 0.0823( 3463)                  |
| S =                                | 1.035                                             | Npar= 208                                         |

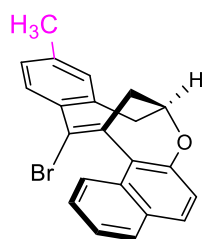

**3b**

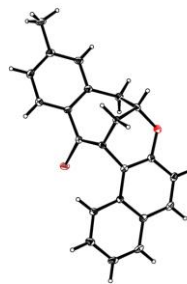

**CCDC 2151486**

|                                                               |                                      |                                      |
|---------------------------------------------------------------|--------------------------------------|--------------------------------------|
| Bond precision:                                               | C-C = 0.0063 Å                       | Wavelength=0.71073                   |
| Cell:                                                         | a=5.5950(3)                          | b=10.2307(4)      c=29.7158(12)      |
| alpha=90                                                      | beta=90                              | gamma=90                             |
| Temperature:                                                  | 293 K                                |                                      |
|                                                               | Calculated                           | Reported                             |
| Volume                                                        | 1700.96(13)                          | 1700.96(13)                          |
| Space group                                                   | P 21 21 21                           | P 21 21 21                           |
| Hall group                                                    | P 2ac 2ab                            | P 2ac 2ab                            |
| Moiety formula                                                | C <sub>22</sub> H <sub>17</sub> Br O | C <sub>22</sub> H <sub>17</sub> Br O |
| Sum formula                                                   | C <sub>22</sub> H <sub>17</sub> Br O | C <sub>22</sub> H <sub>17</sub> Br O |
| Mr                                                            | 377.26                               | 377.26                               |
| Dx, g cm <sup>-3</sup>                                        | 1.473                                | 1.473                                |
| Z                                                             | 4                                    | 4                                    |
| Mu (mm <sup>-1</sup> )                                        | 2.421                                | 2.421                                |
| F000                                                          | 768.0                                | 768.0                                |
| F000'                                                         | 767.13                               |                                      |
| h,k,lmax                                                      | 7,13,40                              | 7,13,37                              |
| Nref                                                          | 4531[ 2634]                          | 3859                                 |
| Tmin,Tmax                                                     | 0.551,0.559                          | 0.831,1.000                          |
| Tmin'                                                         | 0.541                                |                                      |
| Correction method= # Reported T Limits: Tmin=0.831 Tmax=1.000 |                                      |                                      |
| AbsCorr = MULTI-SCAN                                          |                                      |                                      |
| Data completeness= 1.47/0.85                                  |                                      | Theta(max)= 29.010                   |
| R(reflections)= 0.0436( 2981)                                 |                                      | wR2(reflections) = 0.0772( 3859)     |
| S = 1.065                                                     |                                      | Npar= 218                            |

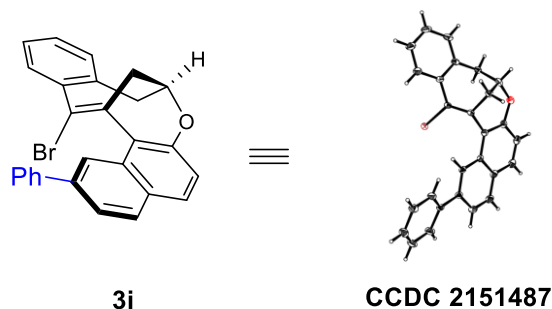

|                        |                                            |                                      |
|------------------------|--------------------------------------------|--------------------------------------|
| Bond precision:        | C-C = 0.0082 Å                             | Wavelength=0.71073                   |
| Cell:                  | a=8.7121(3)                                | b=8.8820(4)      c=13.2952(6)        |
| alpha=90               | beta=98.023(4)                             | gamma=90                             |
| Temperature:           | 293 K                                      |                                      |
|                        | Calculated                                 | Reported                             |
| Volume                 | 1018.73(7)                                 | 1018.72(7)                           |
| Space group            | P 21                                       | P 1 21 1                             |
| Hall group             | P 2yb                                      | P 2yb                                |
| Moiety formula         | C <sub>27</sub> H <sub>19</sub> Br O       | C <sub>27</sub> H <sub>19</sub> Br O |
| Sum formula            | C <sub>27</sub> H <sub>19</sub> Br O       | C <sub>27</sub> H <sub>19</sub> Br O |
| Mr                     | 439.32                                     | 439.33                               |
| Dx,g cm <sup>-3</sup>  | 1.432                                      | 1.432                                |
| Z                      | 2                                          | 2                                    |
| Mu (mm <sup>-1</sup> ) | 2.033                                      | 2.033                                |
| F000                   | 448.0                                      | 448.0                                |
| F000'                  | 447.59                                     |                                      |
| h,k,lmax               | 11,12,18                                   | 11,12,17                             |
| Nref                   | 5421[ 2878]                                | 4625                                 |
| Tmin,Tmax              | 0.443,0.462                                | 0.981,1.000                          |
| Tmin'                  | 0.409                                      |                                      |
| Correction method=     | # Reported T Limits: Tmin=0.981 Tmax=1.000 |                                      |
| AbsCorr =              | MULTI-SCAN                                 |                                      |
| Data completeness=     | 1.61/0.85                                  | Theta(max)= 29.047                   |
| R(reflections)=        | 0.0420( 3735)                              | wR2(reflections) = 0.0842( 4625)     |
| S =                    | 1.053                                      | Npar= 262                            |

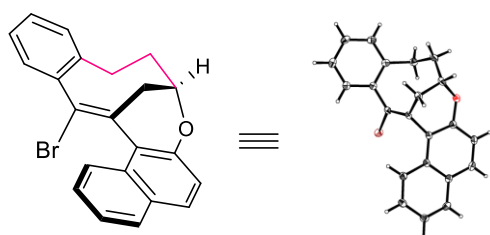

**3s**

**CCDC 2151488**

|                                                 |                                                 |                                      |
|-------------------------------------------------|-------------------------------------------------|--------------------------------------|
| Bond precision:                                 | C-C = 0.0070 Å                                  | Wavelength=0.71073                   |
| Cell:                                           | a=7.6693(2)                                     | b=13.0042(5) c=17.0867(8)            |
| alpha=90                                        | beta=90                                         | gamma=90                             |
| Temperature:                                    | 293 K                                           |                                      |
|                                                 | Calculated                                      | Reported                             |
| Volume                                          | 1704.11(11)                                     | 1704.11(11)                          |
| Space group                                     | P 21 21 21                                      | P 21 21 21                           |
| Hall group                                      | P 2ac 2ab                                       | P 2ac 2ab                            |
| Moiety formula                                  | C <sub>22</sub> H <sub>17</sub> Br O            | C <sub>22</sub> H <sub>17</sub> Br O |
| Sum formula                                     | C <sub>22</sub> H <sub>17</sub> Br O            | C <sub>22</sub> H <sub>17</sub> Br O |
| Mr                                              | 377.26                                          | 377.26                               |
| D <sub>x</sub> , g cm <sup>-3</sup>             | 1.470                                           | 1.470                                |
| Z                                               | 4                                               | 4                                    |
| Mu (mm <sup>-1</sup> )                          | 2.417                                           | 2.417                                |
| F <sub>000</sub>                                | 768.0                                           | 768.0                                |
| F <sub>000</sub> '                              | 767.13                                          |                                      |
| h,k,lmax                                        | 10,17,23                                        | 10,17,23                             |
| N <sub>ref</sub>                                | 4526[ 2582]                                     | 3886                                 |
| T <sub>min</sub> ,T <sub>max</sub>              | 0.386,0.440                                     | 0.824,1.000                          |
| T <sub>min</sub> '                              | 0.357                                           |                                      |
| Correction method= # Reported T Limits:         | T <sub>min</sub> =0.824 T <sub>max</sub> =1.000 |                                      |
| AbsCorr = MULTI-SCAN                            |                                                 |                                      |
| Data completeness= 1.51/0.86 Theta(max)= 28.983 |                                                 |                                      |
| R(reflections)= 0.0458( 2775)                   | wR2(reflections) = 0.0841( 3886)                |                                      |
| S = 1.040                                       | N <sub>par</sub> = 217                          |                                      |

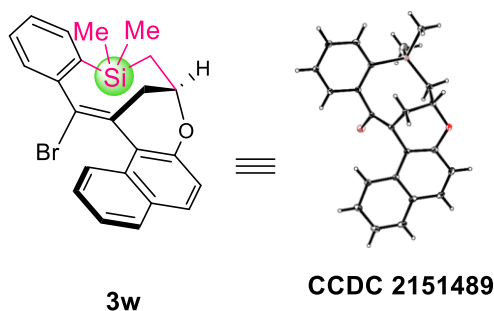

|                                                               |                                         |                                         |
|---------------------------------------------------------------|-----------------------------------------|-----------------------------------------|
| Bond precision:                                               | C-C = 0.0058 Å                          | Wavelength=0.71073                      |
| Cell:                                                         | a=8.6383(3)                             | b=12.6159(5)      c=17.6123(7)          |
| alpha=90                                                      | beta=90                                 | gamma=90                                |
| Temperature:                                                  | 293 K                                   |                                         |
|                                                               | Calculated                              | Reported                                |
| Volume                                                        | 1919.39(13)                             | 1919.39(13)                             |
| Space group                                                   | P 21 21 21                              | P 21 21 21                              |
| Hall group                                                    | P 2ac 2ab                               | P 2ac 2ab                               |
| Moiety formula                                                | C <sub>23</sub> H <sub>21</sub> Br O Si | C <sub>23</sub> H <sub>21</sub> Br O Si |
| Sum formula                                                   | C <sub>23</sub> H <sub>21</sub> Br O Si | C <sub>23</sub> H <sub>21</sub> Br O Si |
| Mr                                                            | 421.39                                  | 421.40                                  |
| Dx, g cm <sup>-3</sup>                                        | 1.458                                   | 1.458                                   |
| Z                                                             | 4                                       | 4                                       |
| Mu (mm <sup>-1</sup> )                                        | 2.213                                   | 2.213                                   |
| F <sub>000</sub>                                              | 864.0                                   | 864.0                                   |
| F <sub>000</sub> '                                            | 863.46                                  |                                         |
| h,k,lmax                                                      | 11,17,24                                | 11,16,23                                |
| Nref                                                          | 5099[ 2887]                             | 4349                                    |
| Tmin,Tmax                                                     | 0.449,0.482                             | 0.806,1.000                             |
| Tmin'                                                         | 0.415                                   |                                         |
| Correction method= # Reported T Limits: Tmin=0.806 Tmax=1.000 |                                         |                                         |
| AbsCorr = MULTI-SCAN                                          |                                         |                                         |
| Data completeness= 1.51/0.85                                  |                                         | Theta(max)= 28.995                      |
| R(reflections)= 0.0398( 3532)                                 |                                         | wR2(reflections) = 0.0805( 4349)        |
| S = 1.039                                                     |                                         | Npar= 237                               |

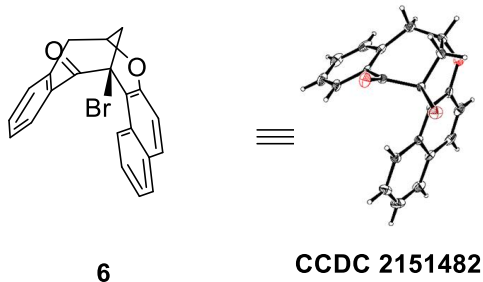

|                                         |                                                   |                                                   |
|-----------------------------------------|---------------------------------------------------|---------------------------------------------------|
| Bond precision:                         | C-C = 0.0104 Å                                    | Wavelength=0.71073                                |
| Cell:                                   | a=8.8697(4)                                       | b=22.6968(7) c=8.9630(5)                          |
| alpha=90                                | beta=114.336(6)                                   | gamma=90                                          |
| Temperature:                            | 293 K                                             |                                                   |
|                                         | Calculated                                        | Reported                                          |
| Volume                                  | 1644.05(15)                                       | 1644.05(15)                                       |
| Space group                             | P 21                                              | P 1 21 1                                          |
| Hall group                              | P 2yb                                             | P 2yb                                             |
| Moiety formula                          | C <sub>21</sub> H <sub>15</sub> Br O <sub>2</sub> | C <sub>21</sub> H <sub>15</sub> Br O <sub>2</sub> |
| Sum formula                             | C <sub>21</sub> H <sub>15</sub> Br O <sub>2</sub> | C <sub>21</sub> H <sub>15</sub> Br O <sub>2</sub> |
| Mr                                      | 379.23                                            | 379.24                                            |
| D <sub>x</sub> ,g cm <sup>-3</sup>      | 1.532                                             | 1.532                                             |
| Z                                       | 4                                                 | 4                                                 |
| Mu (mm <sup>-1</sup> )                  | 2.510                                             | 2.510                                             |
| F <sub>000</sub>                        | 768.0                                             | 768.0                                             |
| F <sub>000</sub> '                      | 767.16                                            |                                                   |
| h,k,lmax                                | 12,30,12                                          | 12,30,12                                          |
| Nref                                    | 8758[ 4487]                                       | 7480                                              |
| Tmin,Tmax                               | 0.526,0.547                                       | 0.664,1.000                                       |
| Tmin' 0.516                             |                                                   |                                                   |
| Correction method= # Reported T Limits: | Tmin=0.664 Tmax=1.000                             |                                                   |
| AbsCorr = MULTI-SCAN                    |                                                   |                                                   |
| Data completeness= 1.67/0.85            |                                                   | Theta(max)= 29.012                                |
| R(reflections)= 0.0472( 5045)           |                                                   | wR2(reflections) = 0.0867( 7480)                  |
| S = 1.010                               |                                                   | Npar= 433                                         |

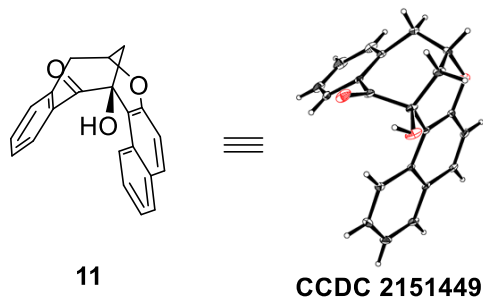

|                                                               |                                  |              |                    |
|---------------------------------------------------------------|----------------------------------|--------------|--------------------|
| Bond precision:                                               | C-C = 0.0041 Å                   |              | Wavelength=1.54184 |
| Cell:                                                         | a=7.48375(11)                    | b=23.7768(5) | c=8.95801(13)      |
| alpha=90                                                      | beta=94.0554(14)                 | gamma=90     |                    |
| Temperature:                                                  | 180 K                            |              |                    |
|                                                               | Calculated                       | Reported     |                    |
| Volume                                                        | 1589.99(5)                       | 1589.99(5)   |                    |
| Space group                                                   | P 21                             |              |                    |
| Hall group                                                    | P 2yb                            |              |                    |
| Moiety formula                                                | C21 H16 O3 [+ solvent]           | C21 H16 O3   |                    |
| Sum formula                                                   | C21 H16 O3 [+ solvent]           |              |                    |
| Mr                                                            | 316.34                           |              |                    |
| Dx,g cm <sup>-3</sup>                                         | 1.321                            |              |                    |
| Z                                                             | 4                                |              |                    |
| Mu (mm <sup>-1</sup> )                                        | 0.707                            |              |                    |
| F000                                                          | 664.0                            |              |                    |
| F000'                                                         | 666.03                           |              |                    |
| h,k,lmax                                                      | 9,29,11                          |              |                    |
| Nref                                                          | 6209[ 3184]                      |              | 5126               |
| Tmin,Tmax                                                     | 0.775,0.770                      |              | 0.334,1.000        |
| Tmin'                                                         | 0.703                            |              |                    |
| Correction method= # Reported T Limits: Tmin=0.334 Tmax=1.000 |                                  |              |                    |
| AbsCorr = MULTI-SCAN                                          |                                  |              |                    |
| Data completeness= 1.61/0.83                                  | Theta(max)= 71.700               |              |                    |
| R(reflections)= 0.0354( 5051)                                 | wR2(reflections) = 0.0924( 5126) |              |                    |
| S = 1.057                                                     | Npar= 435                        |              |                    |

## References

1. S. Jia, Z. Chen, N. Zhang, Y. Tan, Y. Liu, J. Deng and H. Yan, *J. Am. Chem. Soc.*, 2018, **140**, 7056–7060.
2. S. Doherty, J. G. Knight, C. H. Smyth, R. W. Harrington and W. Clegg, *Organometallics*, 2007, **26**, 6453–6461.
3. S. Huang, Z. Chen, H. Mao, F. Hu, D. Li, Y. Tan, F. Yang and W. Qin, *Org. Biomol. Chem.*, 2019, **17**, 1121–1129.
4. T. Ishida, S. Kikuchi, T. Tsubo and T. Yamada, *Org. Lett.*, 2013, **15**, 848–851.
5. F. Zhou, C. Li, M. Li, Y. Jin, H. Jiang, Y. Zhang and W. Wu, *Chem. Commun.*, 2021, 57, 4799–4802.
6. S. Yoshioka, Y. Fujii, H. Tsujino, T. Uno, H. Fujioka and M. Arisawa, *Chem. Commun.*, 2017, **53**, 5970–5973.
7. N. Kapadia and W. Harding, *Tetrahedron*, 2013, **69**, 8914–8920.
8. E. Jiménez-Núñez, M. Raducan, T. Lauterbach, K. Malawi, C. R. Solorio and A. M. Echavarren, *Angew. Chem. Int. Ed.*, 2009, **48**, 6152–6155.
